# Supplementary material for: Systematic Analysis of the Impact of R-Methylation on RBPs-RNA Interactions: A Proteomic Approach
Source: Front Mol Biosci. 2021 Sep 7;8:688973. doi: 10.3389/fmolb.2021.688973 (PMC8454774; doi:10.3389/fmolb.2021.688973)
Supplement: Supplementary file 5 [file Table1.XLSX]

## Sheet: Experimental Design
			Replicates from Triple SILAC (Both Total extract and OOPS strategy)
				Cell treatment
				L	M	H
			Forward	DMSO	MS023	GSK591
			Reverse	DMSO	GSK591	MS023
				FWD		REV
			MS023/DMSO	M/L	ó	H/L
			GSK591/DMSO	H/L	ó	M/L

## Sheet: All Raw Data
Protein IDs	Protein names	Gene names	Peptides WCE FWD	Peptides WCE REV	Peptides Interface FWD	Peptides Interface REV	Unique peptides WCE FWD	Unique peptides WCE REV	Unique peptides Interface FWD	Unique peptides Interface REV	Sequence coverage [%]	Score	Ratio M/L normalized WCE FWD	Ratio M/L normalized WCE REV	Ratio M/L normalized Interface FWD	Ratio M/L normalized Interface REV	Ratio H/L normalized WCE FWD	Ratio H/L normalized WCE REV	Ratio H/L normalized Interface FWD	Ratio H/L normalized Interface REV	Only identified by site	Reverse	Potential contaminant
A0A024QZP7	Cyclin-dependent kinase 1	CDC2	11	12	1	2	9	10	0	1	52.9	65.36	0.80334	0.92873	NaN	1.3358	0.91168	0.71543	NaN	1.7578
A0A024R3M2	GRAM domain-containing protein 1B	hCG_39893	4	2	0	0	4	2	0	0	9.9	6.8988	1.0457	0.83112	NaN	NaN	1.0029	0.90529	NaN	NaN
A0A024R4E5	Vigilin	HDLBP	53	41	22	22	53	41	22	22	45.7	323.31	0.87214	0.87264	1.1786	0.91923	0.87674	0.83211	0.81809	1.0742
K7EN05	Transcription elongation factor 1 homolog	ELOF1	1	1	0	0	1	1	0	0	23.7	16.055	NaN	1.1267	NaN	NaN	NaN	1.0149	NaN	NaN
A0A024RA52	Proteasome subunit alpha type;Proteasome subunit alpha type-2	PSMA2	14	15	1	1	14	15	1	1	57.7	138.91	0.9836	1.0291	NaN	0.63558	1.0592	0.98671	NaN	1.0524
A0A024RAC6		TCEB3	1	1	0	0	1	1	0	0	1.4	4.2693	NaN	NaN	NaN	NaN	NaN	NaN	NaN	NaN
A0A0G2JLK6	Lysosomal thioesterase PPT2	PPT2	0	1	0	0	0	1	0	0	10.6	2.2531	NaN	NaN	NaN	NaN	NaN	NaN	NaN	NaN
A0A024RCR6	Large proline-rich protein BAG6	BAT3	16	19	0	1	16	19	0	1	26.3	165.74	0.99387	0.94587	NaN	NaN	1.0399	1.056	NaN	NaN
A0A075B6F9	Nitric oxide synthase-interacting protein	NOSIP	6	8	0	0	6	8	0	0	41.4	44.932	0.79726	0.73195	NaN	NaN	0.9146	0.87313	NaN	NaN
A0A5H1ZRP7	Dystrophin	DMD	3	2	0	0	3	2	0	0	4.8	5.9008	1.2375	0.90301	NaN	NaN	1.0128	1.4517	NaN	NaN
A0A075B6U4		TRAV7	0	0	0	1	0	0	0	1	19.6	2.1777	NaN	NaN	NaN	NaN	NaN	NaN	NaN	NaN
P0DN26	Peptidyl-prolyl cis-trans isomerase;Peptidyl-prolyl cis-trans isomerase A-like 4A/B/C;Peptidyl-prolyl cis-trans isomerase A-like 4D	PPIAL4C	2	2	2	2	0	0	0	0	16.5	-2	NaN	NaN	NaN	NaN	NaN	NaN	NaN	NaN	+
A0A075B785	LisH domain and HEAT repeat-containing protein KIAA1468	KIAA1468	1	1	0	0	1	1	0	0	6.4	2.8871	NaN	NaN	NaN	NaN	NaN	NaN	NaN	NaN
F8W809	Thioredoxin reductase 1, cytoplasmic	TXNRD1	28	29	0	0	27	28	0	0	75.1	323.31	1.0256	0.97699	NaN	NaN	1.0782	1.1141	NaN	NaN
V9GYI0	Polyamine-modulated factor 1	PMF1	1	1	0	0	1	1	0	0	17.2	3.6672	NaN	NaN	NaN	NaN	NaN	NaN	NaN	NaN
A0A087X2I2	Glutathione peroxidase;Phospholipid hydroperoxide glutathione peroxidase, mitochondrial	GPX4	6	2	0	0	6	2	0	0	32.7	11.152	1.0822	1.0518	NaN	NaN	1.0364	1.1241	NaN	NaN
A0A087WT20	DDB1- and CUL4-associated factor 13	DCAF13	3	2	1	0	3	2	1	0	14.2	8.2858	0.94052	1.083	NaN	NaN	1.1897	1.8116	NaN	NaN
A0A087WT35	Phosphatidylinositol 5-phosphate 4-kinase type-2 beta	PIP4K2B	1	1	0	0	1	1	0	0	19.7	6.4972	NaN	NaN	NaN	NaN	NaN	NaN	NaN	NaN
A0A087WT44	Heme oxygenase 2	HMOX2	7	5	0	0	7	5	0	0	35.4	32.283	0.9479	1.0919	NaN	NaN	0.96399	0.89316	NaN	NaN
A0A087WT45	GRIP1-associated protein 1	GRIPAP1	4	3	0	0	4	3	0	0	7.9	16.22	1.2306	0.8367	NaN	NaN	1.0022	0.94938	NaN	NaN
A0A087X0U3	Amino acid transporter;Excitatory amino acid transporter 1	SLC1A3	1	1	0	0	1	1	0	0	2.8	6.2779	NaN	1.0076	NaN	NaN	NaN	0.40353	NaN	NaN
A0A087WTA5	Translation initiation factor eIF-2B subunit delta	EIF2B4	5	3	0	0	5	3	0	0	15.8	9.0525	0.98294	0.99021	NaN	NaN	1.0351	0.84387	NaN	NaN
F5H5N1	NADH dehydrogenase [ubiquinone] iron-sulfur protein 7, mitochondrial	NDUFS7	1	1	0	0	1	1	0	0	4.9	6.3893	0.69206	NaN	NaN	NaN	0.61916	NaN	NaN	NaN
A0A087WTK0	Protein-tyrosine-phosphatase;Receptor-type tyrosine-protein phosphatase eta	PTPRJ	0	0	2	2	0	0	2	2	2.3	7.7254	NaN	NaN	1.1256	0.77405	NaN	NaN	0.89537	1.1194
A0A087WTU3	Testis-expressed sequence 264 protein	TEX264	1	1	0	0	1	1	0	0	5.9	2.7042	NaN	0.89422	NaN	NaN	NaN	0.68033	NaN	NaN
A0A087WV20	Alstrom syndrome protein 1	ALMS1	0	1	0	2	0	1	0	2	1.2	2.6141	NaN	NaN	NaN	NaN	NaN	NaN	NaN	NaN
A0A087WTV6	Pyrroline-5-carboxylate reductase 2;Pyrroline-5-carboxylate reductase	PYCR2	7	7	0	0	6	6	0	0	35.8	34.066	0.633	0.93359	NaN	NaN	0.94012	0.83244	NaN	NaN
A0A087WVR3	E3 ubiquitin-protein ligase UHRF1	UHRF1	12	14	0	0	11	13	0	0	23.4	139.43	1.0635	0.89346	NaN	NaN	0.95125	0.92766	NaN	NaN
A0A087WU02	Endoplasmic reticulum-Golgi intermediate compartment protein 2	ERGIC2	2	2	0	0	2	2	0	0	7.8	6.6764	0.99605	1.3041	NaN	NaN	0.8737	1.2808	NaN	NaN
A0A087WU53	Magnesium transporter protein 1	MAGT1	4	3	0	0	4	3	0	0	11.4	6.3427	1.0863	1.0049	NaN	NaN	1.0533	1.0289	NaN	NaN
A0A087WU65	Vacuolar protein sorting-associated protein 45	VPS45	6	6	0	0	6	6	0	0	16.8	12.14	1.0971	1.1185	NaN	NaN	0.99414	1.0103	NaN	NaN
A0A087WUB9	Beta-catenin-like protein 1	CTNNBL1	6	5	0	0	6	5	0	0	13	14.538	1.046	1.0947	NaN	NaN	1.1194	0.9627	NaN	NaN
A0A087WUD3	Oligosaccharyltransferase complex subunit OSTC	OSTC	1	1	0	0	1	1	0	0	14.5	14.976	0.98587	0.9378	NaN	NaN	0.95879	1.1851	NaN	NaN
A0A087WUD7	Sec1 family domain-containing protein 2	SCFD2	2	1	0	0	2	1	0	0	5.2	4.0859	0.76921	NaN	NaN	NaN	0.94735	NaN	NaN	NaN
A0A087WUL4	Retrotransposon-derived protein PEG10	PEG10	10	12	2	1	10	12	2	1	24.7	63.143	1.1737	0.83578	2.7571	0.9382	0.78764	1.2567	0.86056	3.2985
A0A087WUN7	SRA stem-loop-interacting RNA-binding protein, mitochondrial	SLIRP	6	6	3	5	6	6	3	5	79.3	128.97	0.77438	0.99157	0.85642	1.0322	0.99782	0.84538	0.95698	0.86546
A0A087WUQ6	Glutathione peroxidase;Glutathione peroxidase 1	GPX1	9	10	0	0	9	10	0	0	69.3	84.817	0.96502	0.91809	NaN	NaN	0.91544	1.0325	NaN	NaN
A0A087WUT6	Eukaryotic translation initiation factor 5B	EIF5B	29	28	6	6	29	28	6	6	36.5	188.1	1.0014	1.0599	1.1092	0.6203	1.0342	0.94474	0.75537	1.0601
A0A087X0G7	NF-kappa-B essential modulator	IKBKG	4	2	0	0	4	2	0	0	16.8	25.38	0.93913	0.88667	NaN	NaN	0.90463	0.91146	NaN	NaN
A0A087WUZ3		SPTBN1	110	104	1	1	0	1	0	0	61.4	-2	NaN	NaN	NaN	NaN	NaN	NaN	NaN	NaN	+
A0A087WV01	Elongation factor 1-alpha	EEF1A1	35	34	12	15	0	1	0	0	79.1	-2	NaN	NaN	NaN	NaN	NaN	NaN	NaN	NaN	+
A0A087WV05	C-Myc-binding protein	MYCBP	3	3	0	0	3	3	0	0	34.5	15.427	0.93	1.002	NaN	NaN	1.0873	1.0025	NaN	NaN
A0A087WV25	FGFR1 oncogene partner	FGFR1OP	2	2	0	0	2	2	0	0	11.4	15.572	NaN	0.99072	NaN	NaN	NaN	0.82788	NaN	NaN
A0A087WV29	N-acetyltransferase 10	NAT10	9	10	0	0	9	10	0	0	22.1	34.861	1.1421	0.82843	NaN	NaN	1.1042	1.0228	NaN	NaN
A0A087WV46	Ragulator complex protein LAMTOR4;Ragulator complex protein LAMTOR4, N-terminally processed	LAMTOR4	1	1	0	0	1	1	0	0	12.2	63.091	NaN	NaN	NaN	NaN	NaN	NaN	NaN	NaN
A0A087WVM4	Monofunctional C1-tetrahydrofolate synthase, mitochondrial	MTHFD1L	9	11	0	0	6	7	0	0	18.9	20.639	1.1764	1.0073	NaN	NaN	0.90241	1.0684	NaN	NaN
A0A087WVQ6	Clathrin heavy chain;Clathrin heavy chain 1	CLTC	90	88	5	8	69	68	4	6	63.8	323.31	0.95098	1.005	2.6371	1.3184	1.0041	0.93196	0.9355	2.4069
Q9NW25	Single-stranded DNA-binding protein 3	SSBP3	1	1	0	0	1	1	0	0	6.1	4.8419	NaN	NaN	NaN	NaN	NaN	NaN	NaN	NaN
A0A087WVZ9	DNA-directed RNA polymerases I, II, and III subunit RPABC1	POLR2E	8	7	0	0	8	7	0	0	55.4	39.777	0.95039	1.0027	NaN	NaN	0.97935	0.94114	NaN	NaN
A0A087WW35	Methyltransferase-like protein 2A;Methyltransferase-like protein 2B	METTL2A	1	1	0	0	1	1	0	0	6.1	3.5638	1.0087	NaN	NaN	NaN	1.023	NaN	NaN	NaN
A0A087WW40	Endophilin-B1	SH3GLB1	7	6	0	1	7	6	0	1	24.1	71.126	1.145	1.0502	NaN	1.0424	0.94819	1.0167	NaN	1.9712
A0A087WW58	Ethanolaminephosphotransferase 1	EPT1	2	3	0	0	2	3	0	0	8.1	21.469	1.2693	0.98587	NaN	NaN	0.91191	0.95121	NaN	NaN
B4DGL8	ATP-binding cassette sub-family B member 7, mitochondrial	ABCB7	4	1	0	0	4	1	0	0	10.7	4.5567	0.95321	NaN	NaN	NaN	1.2678	NaN	NaN	NaN
A0A087WW77	Lethal(2) giant larvae protein homolog 1	LLGL1	1	3	0	0	1	3	0	0	5.9	4.1958	NaN	1.4498	NaN	NaN	NaN	0.71954	NaN	NaN
A0A087WWF1	Selenoprotein M	SELM	0	1	0	0	0	1	0	0	10.4	2.9735	NaN	NaN	NaN	NaN	NaN	NaN	NaN	NaN
A0A087WWF6	DNA polymerase delta subunit 2	POLD2	7	7	0	0	7	7	0	0	29.6	33.429	1.0537	0.84495	NaN	NaN	0.85995	1.0073	NaN	NaN
A0A087WWM0	Trafficking protein particle complex subunit 3	TRAPPC3	3	3	0	0	3	3	0	0	18.1	9.5641	1.0991	0.95557	NaN	NaN	0.82794	1.0154	NaN	NaN
H0YMB3	GMP reductase;GMP reductase 2	GMPR2	3	5	0	0	3	5	0	0	18.7	6.8238	0.91991	0.99444	NaN	NaN	0.85179	1.0914	NaN	NaN
I3L411	Myc-associated zinc finger protein	MAZ	1	1	0	0	1	1	0	0	28.3	2.2133	NaN	NaN	NaN	NaN	NaN	NaN	NaN	NaN
A0A087WWS1	THO complex subunit 1	THOC1	4	6	0	0	4	6	0	0	16.7	16.848	0.89713	1.2568	NaN	NaN	0.87412	1.1545	NaN	NaN
A0A087WXX8	Succinate dehydrogenase [ubiquinone] iron-sulfur subunit, mitochondrial	SDHB	2	3	0	0	2	3	0	0	26.8	13.949	1.2802	1.2057	NaN	NaN	1.0731	0.93867	NaN	NaN
A0A087WWU1	Transmembrane protein 237	TMEM237	1	0	0	0	1	0	0	0	4.8	2.9353	NaN	NaN	NaN	NaN	NaN	NaN	NaN	NaN
A0A087WWW8	Calcineurin-binding protein cabin-1	CABIN1	2	2	0	0	2	2	0	0	2.3	2.5654	NaN	NaN	NaN	NaN	NaN	NaN	NaN	NaN
A0A087WWW9	B-cell lymphoma/leukemia 10	BCL10	2	2	0	0	2	2	0	0	23	5.1548	0.91103	1.0935	NaN	NaN	1.0832	0.91489	NaN	NaN
A0A087WXC5	NADH dehydrogenase [ubiquinone] 1 alpha subcomplex subunit 10, mitochondrial	NDUFA10	7	6	0	0	7	6	0	0	21.1	21.01	0.96687	1.1781	NaN	NaN	1.1249	1.0628	NaN	NaN
A0A087WXI4		TMCO3	1	1	0	0	1	1	0	0	17.2	-2	NaN	NaN	NaN	NaN	NaN	NaN	NaN	NaN	+
A0A087WXM6	60S ribosomal protein L17	RPL17	14	15	4	7	14	15	4	7	61.5	140.81	0.97703	0.94061	1.4782	1.1673	1.0189	0.96174	0.82971	1.2059
A0A087WXM8	Basal cell adhesion molecule	BCAM	11	14	1	4	11	14	1	4	39.5	49.847	1.3325	0.67407	NaN	0.55376	0.77445	1.2899	NaN	1.4473
A0A087WY55	Vacuolar protein sorting-associated protein VTA1 homolog	VTA1	5	5	0	0	5	5	0	0	27.1	127.36	0.9104	0.97794	NaN	NaN	1.1036	0.95691	NaN	NaN
A0A087WY71	AP-2 complex subunit mu	AP2M1	7	7	0	0	5	5	0	0	21.7	36.001	0.84509	0.96864	NaN	NaN	0.87643	0.81226	NaN	NaN
F8W120	Transmembrane protein 106C	TMEM106C	1	1	0	0	1	1	0	0	26.2	3.7902	NaN	NaN	NaN	NaN	NaN	NaN	NaN	NaN
A0A087WYF6	WASH complex subunit FAM21A	FAM21A	5	5	0	0	1	1	0	0	8.5	2.6483	0.79685	NaN	NaN	NaN	0.96606	NaN	NaN	NaN
A0A087WYF8	PDZ and LIM domain protein 3	PDLIM3	4	3	0	0	4	3	0	0	28.6	30.34	0.80474	1.1069	NaN	NaN	0.81868	0.64241	NaN	NaN
A0A087WYJ2	DNA polymerase;DNA polymerase delta catalytic subunit	POLD1	8	7	0	0	8	7	0	0	14.8	18.779	0.8607	0.6905	NaN	NaN	0.76436	0.79066	NaN	NaN
F5GWT2	Programmed cell death protein 2	PDCD2	0	1	0	0	0	1	0	0	20.2	2.7544	NaN	NaN	NaN	NaN	NaN	NaN	NaN	NaN
G3V4A5	Mediator of RNA polymerase II transcription subunit 6	MED6	0	1	0	0	0	1	0	0	4.4	2.2174	NaN	NaN	NaN	NaN	NaN	NaN	NaN	NaN
A0A087WYT3	Prostaglandin E synthase 3	PTGES3	12	12	4	7	12	12	4	7	52.4	323.31	0.94481	1.0206	2.7714	1.1948	1.0503	0.97353	0.812	2.6195
A0A087WYV6	Tetraspanin-6	TSPAN6	3	3	0	0	3	3	0	0	25.6	13.996	1.0605	0.82948	NaN	NaN	0.9126	0.90303	NaN	NaN
A0A087WZ13	Ribonucleoprotein PTB-binding 1	RAVER1	14	11	8	10	14	11	8	10	48	78.734	1.0836	1.2287	0.98313	1.4204	1.2606	0.93055	1.2202	1.0848
A0A087X0J3	Adenylyl cyclase-associated protein;Adenylyl cyclase-associated protein 2	CAP2	4	1	0	0	3	0	0	0	18	11.768	0.96136	NaN	NaN	NaN	1.3859	NaN	NaN	NaN
A0A590UK10	Rho guanine nucleotide exchange factor 18	ARHGEF18	5	3	0	0	5	3	0	0	9.8	6.1774	1.0634	1.2025	NaN	NaN	0.72695	1.056	NaN	NaN
A0A2R8YCP1	Ribonuclease H2 subunit B	RNASEH2B	1	1	0	1	1	1	0	1	8.7	4.3762	NaN	NaN	NaN	NaN	NaN	NaN	NaN	NaN
A0A087WZK9	Eukaryotic translation initiation factor 3 subunit H	EIF3H	12	14	0	0	12	14	0	0	44.1	110.72	1.1394	1.0567	NaN	NaN	0.98298	0.94027	NaN	NaN
A0A087WZL0	Pleckstrin homology-like domain family B member 1	PHLDB1	1	1	0	0	1	1	0	0	1.7	2.2647	NaN	NaN	NaN	NaN	NaN	NaN	NaN	NaN
A0A087WZN1	Isocitrate dehydrogenase [NAD] subunit, mitochondrial;Isocitrate dehydrogenase [NAD] subunit beta, mitochondrial	IDH3B	6	9	0	0	6	9	0	0	42.1	22.658	0.98813	1.1441	NaN	NaN	0.99943	1.0144	NaN	NaN
A0A087WZQ1	Potassium voltage-gated channel subfamily H member 7	KCNH7	1	2	0	0	1	2	0	0	6.7	2.1877	NaN	NaN	NaN	NaN	NaN	NaN	NaN	NaN
A0A087WZX0	B-cell CLL/lymphoma 9-like protein	BCL9L	1	3	0	0	1	3	0	0	4.1	2.9793	NaN	1.4843	NaN	NaN	NaN	0.81534	NaN	NaN
A0A087WZX2	NADH dehydrogenase [ubiquinone] 1 beta subcomplex subunit 6	NDUFB6	1	1	0	0	1	1	0	0	10.3	2.5559	NaN	NaN	NaN	NaN	NaN	NaN	NaN	NaN
A0A087X014	Zinc finger protein 804A	ZNF804A	1	1	0	0	1	1	0	0	0.7	-2	NaN	NaN	NaN	NaN	NaN	NaN	NaN	NaN	+
A0A087X020	Ribosome maturation protein SBDS	SBDS	14	12	1	1	14	12	1	1	48.8	79.278	0.97096	0.95291	0.92537	0.91074	0.94288	0.94938	1.2033	1.0853
A0A087X041		PDE4DIP	1	1	0	0	1	1	0	0	5.7	-2	NaN	NaN	NaN	NaN	NaN	NaN	NaN	NaN	+
A0A087X0K9	Tight junction protein ZO-1	TJP1	9	6	0	0	9	6	0	0	8.4	57.655	1.0744	0.90373	NaN	NaN	0.93998	1.1438	NaN	NaN
A0A087X0L7	Mitochondrial inner membrane protein OXA1L	OXA1L	3	2	0	0	3	2	0	0	9	7.8547	0.87415	0.74291	NaN	NaN	1.0892	0.73163	NaN	NaN
A0A087X0M4	Kanadaptin	SLC4A1AP	4	3	0	0	4	3	0	0	15.6	9.6295	0.9584	1.0226	NaN	NaN	0.98861	0.95658	NaN	NaN
A0A087X0Q9	Selenoprotein O	SELO	2	1	0	0	2	1	0	0	3.7	2.8233	0.78628	NaN	NaN	NaN	1.4418	NaN	NaN	NaN
A0A087X0R6	Sorting nexin-12	SNX12	9	9	1	0	8	8	1	0	61	53.851	0.9845	0.9101	NaN	NaN	1.0135	0.86668	NaN	NaN
A0A087X0S5	Collagen alpha-1(VI) chain	COL6A1	0	1	0	0	0	1	0	0	1.8	3.2989	NaN	NaN	NaN	NaN	NaN	NaN	NaN	NaN
G3V4F2	Acyl-coenzyme A thioesterase 1;Acyl-coenzyme A thioesterase 2, mitochondrial	ACOT1	6	4	0	0	6	4	0	0	24.3	16.5	0.49542	0.85848	NaN	NaN	0.97999	0.52939	NaN	NaN
Q2TAM5	Transcription factor p65	RELA	6	5	0	0	6	5	0	0	26.3	23.73	0.87722	0.96555	NaN	NaN	1.1024	0.73937	NaN	NaN
A0A087X0W9	OTU domain-containing protein 6B	OTUD6B	2	3	0	0	2	3	0	0	11.5	9.5598	1.0987	0.98841	NaN	NaN	1.0355	1.1448	NaN	NaN
A0A087X142	Septin-8	2008-09-01	5	5	0	0	2	2	0	0	17.4	8.0603	1.1059	2.6885	NaN	NaN	0.99157	2.2849	NaN	NaN
S4R418	Bridging integrator 2	BIN2	1	1	1	1	0	0	1	1	3.8	2.1145	NaN	NaN	NaN	NaN	NaN	NaN	NaN	NaN
A0A087X1B2	U4/U6.U5 tri-snRNP-associated protein 2	USP39	4	5	0	0	4	5	0	0	18.1	23.054	1.0512	1.1562	NaN	NaN	1.0513	0.98032	NaN	NaN
A0A087X1E4	Arfaptin-2	ARFIP2	3	3	0	0	1	1	0	0	11.5	10.568	0.88435	0.68327	NaN	NaN	0.82647	0.9863	NaN	NaN
A0A087X1G7	15 kDa selenoprotein	2015-09-01	3	2	0	0	3	2	0	0	25	35.62	0.88405	1.0189	NaN	NaN	0.84001	0.89909	NaN	NaN
A0A087X1N3	Ribonuclease P protein subunit p40	RPP40	3	2	0	1	3	2	0	1	24.3	4.6576	0.95807	1.1817	NaN	NaN	1.2888	1.0568	NaN	NaN
A0A087X1N7	Nebulin	NEB	2	3	0	0	2	3	0	0	0.6	2.985	NaN	NaN	NaN	NaN	NaN	NaN	NaN	NaN
A0A087X1X9	Stromal membrane-associated protein 1	SMAP1	2	1	0	0	2	1	0	0	5.5	7.7442	1.021	NaN	NaN	NaN	1.0031	NaN	NaN	NaN
A0A087X1Z2	EF-hand domain-containing protein D1	EFHD1	3	3	0	0	1	1	0	0	23.2	4.8105	NaN	NaN	NaN	NaN	NaN	NaN	NaN	NaN
A0A087X1Z3	Proteasome activator complex subunit 2	PSME2	15	17	1	1	15	17	1	1	68.1	285.76	1.0052	0.98192	NaN	0.97954	0.97573	0.93932	NaN	1.0214
A0A087X208	Agrin;Agrin N-terminal 110 kDa subunit;Agrin C-terminal 110 kDa subunit;Agrin C-terminal 90 kDa fragment;Agrin C-terminal 22 kDa fragment	AGRN	1	2	1	1	1	2	1	1	2.2	5.1841	NaN	0.90026	NaN	NaN	NaN	1.5587	NaN	NaN
A0A087X256	WASH complex subunit 7	KIAA1033	4	4	0	0	4	4	0	0	6.6	22.244	0.72438	0.97178	NaN	NaN	0.95086	0.71793	NaN	NaN
E9PIW1	Baculoviral IAP repeat-containing protein 2;Baculoviral IAP repeat-containing protein 3	BIRC2	2	1	0	0	2	1	0	0	14.3	2.0524	0.84217	NaN	NaN	NaN	1.3875	NaN	NaN	NaN
A0A087X2C3	Ras-related protein Rap-2c	RAP2C	2	2	0	0	2	2	0	0	21.4	4.2185	1.0099	0.73727	NaN	NaN	1.0107	1.0758	NaN	NaN
A0A087X2D5	39S ribosomal protein L45, mitochondrial	MRPL45	7	6	0	1	7	6	0	1	38.9	17.715	0.93702	0.95062	NaN	NaN	0.92454	1.0309	NaN	NaN
A0A087X2I1	26S protease regulatory subunit 10B	PSMC6	23	22	0	2	23	22	0	2	68	226.87	1.0374	1.028	NaN	1.7918	1.0648	0.98196	NaN	2.6001
G3V5V2	WD repeat-containing protein 20	WDR20	1	0	0	0	1	0	0	0	82.6	-2	NaN	NaN	NaN	NaN	NaN	NaN	NaN	NaN	+
A0A090HNM7	DNA repair protein complementing XP-G cells	ERCC5-201	2	2	0	0	2	2	0	0	2.5	4.1301	NaN	NaN	NaN	NaN	NaN	NaN	NaN	NaN
A0A096LNZ9	Ubiquitin-like protein ISG15	ISG15	3	1	0	0	3	1	0	0	20.3	6.1512	1.2328	NaN	NaN	NaN	0.80343	NaN	NaN	NaN
A0A096LP69	CD99 antigen	CD99	2	2	0	0	2	2	0	0	23.9	127.41	NaN	0.90239	NaN	NaN	NaN	1.22	NaN	NaN
J3KP36	WASH complex subunit FAM21C	FAM21C	5	5	0	0	1	1	0	0	8.4	17.695	0.79451	0.7986	NaN	NaN	0.98725	0.81044	NaN	NaN
A0A096LPD9	Thioredoxin reductase 2, mitochondrial	TXNRD2	2	4	0	0	1	3	0	0	25.8	6.6277	NaN	1.1557	NaN	NaN	NaN	0.69356	NaN	NaN
A0A096LPI6		C21orf33	5	4	2	2	4	3	0	0	31.5	46.486	0.59392	0.93999	NaN	NaN	0.85163	0.60167	NaN	NaN
A0A0A0MQR2	Protein RTF2 homolog	RTFDC1	5	5	0	0	5	5	0	0	19.3	8.8292	0.93154	0.84599	NaN	NaN	1.0238	0.93887	NaN	NaN
A0A0A0MQS1	Pyrroline-5-carboxylate reductase;Pyrroline-5-carboxylate reductase 3	PYCRL	4	5	0	0	4	5	0	0	23.8	12.172	0.76795	0.75733	NaN	NaN	0.75204	0.83696	NaN	NaN
U3KQC1	WD repeat-containing protein 18	WDR18	4	6	0	0	4	6	0	0	17.5	17.063	1.0576	1.0836	NaN	NaN	0.97856	0.92305	NaN	NaN
A0A0A0MQU4	Selenocysteine lyase	SCLY	2	0	0	0	2	0	0	0	7.9	3.0401	0.74574	NaN	NaN	NaN	0.82661	NaN	NaN	NaN
A0A0A0MQV6	Fibroblast growth factor 2	FGF2	1	1	0	0	1	1	0	0	3.5	2.2811	NaN	NaN	NaN	NaN	NaN	NaN	NaN	NaN
C9JP00	Muscleblind-like protein 1	MBNL1	10	8	6	9	4	3	1	3	40.2	20.59	1.1656	0.96344	1.0693	1.0612	1.0439	0.99422	0.97297	1.0367
A0A0A0MR02	Voltage-dependent anion-selective channel protein 2	VDAC2	15	14	0	0	15	14	0	0	65.2	165.34	1.1218	1.1814	NaN	NaN	1.0928	1.1015	NaN	NaN
H3BSZ4	Target of rapamycin complex subunit LST8	MLST8	2	2	0	0	1	1	0	0	10.5	4.8653	0.92675	1.0608	NaN	NaN	1.0343	0.95546	NaN	NaN
Q5T092	Protein RER1	RER1	3	3	0	0	3	3	0	0	29.7	42.201	0.89206	0.86847	NaN	NaN	0.91984	0.84995	NaN	NaN
G3V3B9	Maleylacetoacetate isomerase	GSTZ1	1	0	0	0	1	0	0	0	11.8	3.2966	0.60795	NaN	NaN	NaN	0.97671	NaN	NaN	NaN
A0A0A0MR85	Glutathione S-transferase Mu 4	GSTM4	6	6	0	0	1	1	0	0	28.4	2.3413	0.78805	0.70754	NaN	NaN	0.71586	0.71338	NaN	NaN
A0A0A0MRF6	A-kinase anchor protein 9	AKAP9	2	3	0	1	2	3	0	1	2	4.3758	1.0127	1.0325	NaN	NaN	1.1377	0.72253	NaN	NaN
A0A0A0MRH8	Chromodomain-helicase-DNA-binding protein 1-like	CHD1L	3	1	0	0	3	1	0	0	3.8	4.6317	1.163	NaN	NaN	NaN	0.99204	NaN	NaN	NaN
A0A0A0MRJ6	Protein-L-isoaspartate O-methyltransferase;Protein-L-isoaspartate(D-aspartate) O-methyltransferase	PCMT1	14	16	0	0	14	16	0	0	58.2	202	0.88521	1.0403	NaN	NaN	1.0377	0.89089	NaN	NaN
F8W895	G patch domain-containing protein 4	GPATCH4	2	3	1	1	2	3	1	1	15.9	7.199	0.94035	1.051	0.98835	0.9338	0.55054	1.1558	1.0429	0.95903
A0A0A0MRM8	Unconventional myosin-VI	MYO6	5	5	0	0	5	5	0	0	8.8	9.9319	1.1794	0.99067	NaN	NaN	0.97214	1.1913	NaN	NaN
A0A0A0MRP6	Probable global transcription activator SNF2L1	SMARCA1	9	8	0	0	1	1	0	0	8.6	2.549	1.0579	NaN	NaN	NaN	0.91204	NaN	NaN	NaN
A0A0A0MRS7	Ankyrin repeat and SAM domain-containing protein 6	ANKS6	1	0	0	0	1	0	0	0	5.1	2.2403	NaN	NaN	NaN	NaN	NaN	NaN	NaN	NaN
B6VEX4	Abl interactor 1	ABI1	5	3	0	0	5	2	0	0	20.9	22.585	1.0686	1.2465	NaN	NaN	1.0362	1.0265	NaN	NaN
B1AM48	ELAV-like protein;ELAV-like protein 2	ELAVL2	1	1	2	1	0	0	1	0	14.3	2.1792	NaN	NaN	NaN	NaN	NaN	NaN	NaN	NaN
A0A1B0GWB8	Nuclear factor 1;Nuclear factor 1 B-type	NFIB	1	2	0	0	1	2	0	0	14.3	2.8584	NaN	0.94268	NaN	NaN	NaN	0.75447	NaN	NaN
E7EMV7	TNFAIP3-interacting protein 1	TNIP1	0	0	1	2	0	0	1	2	6.5	8.1842	NaN	NaN	NaN	0.82458	NaN	NaN	NaN	3.1041
A0A0A0MS45	Conserved oligomeric Golgi complex subunit 4	COG4	1	2	0	0	1	2	0	0	3.3	2.8709	NaN	0.99267	NaN	NaN	NaN	1.5942	NaN	NaN
A0A0A0MS51	Gelsolin	GSN	8	7	0	1	8	7	0	1	26.2	53.563	1.0552	0.92427	NaN	NaN	0.80851	1.1097	NaN	NaN
A0A0A0MS54	cAMP-dependent protein kinase catalytic subunit beta	PRKACB	10	7	0	0	2	1	0	0	34.7	23.779	0.59722	0.92279	NaN	NaN	0.89689	0.70137	NaN	NaN
A0A0A0MS59	Helicase SRCAP	SRCAP	2	1	0	0	2	1	0	0	0.6	2.4341	1.0656	NaN	NaN	NaN	1.2528	NaN	NaN	NaN
A0A3B3ITY3	Myeloid differentiation primary response protein MyD88	MYD88	0	1	0	0	0	1	0	0	9.4	2.7675	NaN	NaN	NaN	NaN	NaN	NaN	NaN	NaN
A0A0A0MS99	Multidrug resistance-associated protein 1	ABCC1	4	2	0	0	4	2	0	0	5	8.8905	0.85329	1.147	NaN	NaN	0.9031	0.84098	NaN	NaN
A0A0A0MSA7	Eukaryotic translation initiation factor 4 gamma 3	EIF4G3	12	9	0	0	6	6	0	0	10.4	13.462	1.0239	0.95272	NaN	NaN	0.90022	0.90974	NaN	NaN
A0A0A0MSB8	Exocyst complex component 7	EXOC7	5	6	0	0	5	6	0	0	14	15.531	1.0729	0.88025	NaN	NaN	0.84293	1.0624	NaN	NaN
A0A0A0MSE2	Hydroxyacyl-coenzyme A dehydrogenase, mitochondrial	HADH	8	7	0	0	8	7	0	0	45.7	69.466	0.51243	1.2658	NaN	NaN	1.0608	0.43644	NaN	NaN
C9JHU6	UPF0554 protein C2orf43	LDAH	1	1	0	0	1	1	0	0	7.7	3.1383	NaN	NaN	NaN	NaN	NaN	NaN	NaN	NaN
B3KPJ4	Polyhomeotic-like protein 2	PHC2	1	1	1	1	1	1	1	1	2.2	-2	NaN	NaN	NaN	NaN	NaN	NaN	NaN	NaN	+
F8W9B8	Exocyst complex component 5	EXOC5	3	3	0	0	3	3	0	0	6.4	7.1972	0.88028	1.0832	NaN	NaN	1.3288	2.8484	NaN	NaN
A0A0A0MSK5	Torsin-1A-interacting protein 1	TOR1AIP1	11	11	0	0	1	1	0	0	40	2.8711	NaN	1.2772	NaN	NaN	NaN	1.0389	NaN	NaN
A0A0A0MSS8	Aldo-keto reductase family 1 member C3	AKR1C3	15	15	0	0	1	1	0	0	65.3	193.06	0.73811	1.0021	NaN	NaN	1.0026	0.83241	NaN	NaN
A0A0A0MST8	Anion exchange protein;Sodium bicarbonate cotransporter 3	SLC4A7	3	2	0	0	3	2	0	0	6.7	5.9119	1.17	NaN	NaN	NaN	0.89017	NaN	NaN	NaN
H7C1L3	ELM2 and SANT domain-containing protein 1	ELMSAN1	1	2	0	0	1	2	0	0	7	2.4443	NaN	NaN	NaN	NaN	NaN	NaN	NaN	NaN
A0A0G2JKZ1	Tapasin	TAPBP	4	3	0	0	4	3	0	0	9.8	10.606	0.94472	0.96765	NaN	NaN	0.8256	0.84454	NaN	NaN
A0A0A0MSW4	Phosphatidylinositol transfer protein beta isoform	PITPNB	9	10	0	0	8	9	0	0	52.8	49.209	1.1554	1.1507	NaN	NaN	1.1689	1.1433	NaN	NaN
M0R116	Sodium/potassium-transporting ATPase subunit alpha-3	ATP1A3	17	17	3	3	0	0	0	0	21.7	-2	NaN	NaN	NaN	NaN	NaN	NaN	NaN	NaN	+
A0A0A0MT32	Lysosomal acid lipase/cholesteryl ester hydrolase	LIPA	0	3	0	0	0	3	0	0	18.4	5.0934	NaN	1.1139	NaN	NaN	NaN	0.79318	NaN	NaN
A0A0A0MT33	Protein SCAF8	SCAF8	1	2	0	0	1	0	0	0	2.2	2.8523	NaN	1.4846	NaN	NaN	NaN	1.6437	NaN	NaN
A0A0C4DG88	POU domain protein;POU domain, class 2, transcription factor 1;POU domain, class 2, transcription factor 2;POU domain, class 2, transcription factor 3	POU2F1	1	2	0	0	1	2	0	0	7.7	5.4771	1.0031	0.88967	NaN	NaN	0.95657	0.76802	NaN	NaN
A0A2R8Y7S2	Transcription activator BRG1	SMARCA4	6	7	0	0	4	5	0	0	5.4	15.725	0.94541	1.1112	NaN	NaN	1.072	0.83713	NaN	NaN
Q5JXX1	Mortality factor 4-like protein 2	MORF4L2	1	1	0	0	1	1	0	0	12.7	2.9165	NaN	NaN	NaN	NaN	NaN	NaN	NaN	NaN
A0A0A0MTB8	WD repeat-containing protein 36	WDR36	9	13	0	0	9	13	0	0	21.1	38.081	0.8984	1.0494	NaN	NaN	0.97976	1.0318	NaN	NaN
A0A0A0MTR7	E3 ubiquitin-protein ligase RNF213	RNF213	6	4	1	2	6	4	1	2	1.8	9.3493	0.58893	0.67839	1.0767	1.0422	0.7329	0.43527	1.0459	0.96847
A0A0A0MTG2	Cytoplasmic dynein 1 intermediate chain 1	DYNC1I1	1	1	0	0	1	1	0	0	6.2	11.99	NaN	NaN	NaN	NaN	NaN	NaN	NaN	NaN
A0A0A0MTH3	Integrin-linked protein kinase	ILK	12	14	0	0	3	3	0	0	36.4	64.345	0.84189	1.0518	NaN	NaN	0.95961	0.93196	NaN	NaN
A0A0A0MTI1	Delta(24)-sterol reductase	DHCR24	6	3	0	0	6	3	0	0	11	10.376	0.70004	0.79143	NaN	NaN	0.83565	0.61042	NaN	NaN
A0A0R4J2G3	Neutral cholesterol ester hydrolase 1	NCEH1	11	12	0	0	11	12	0	0	36.6	141.4	1.0086	0.92597	NaN	NaN	0.94919	1.0819	NaN	NaN
A0A0A0MTN0	Cullin-2	CUL2	5	9	0	0	5	9	0	0	21.6	19.407	0.90226	0.82859	NaN	NaN	1.2278	0.90889	NaN	NaN
A0A0A0MTS7	Titin	TTN	4	6	2	2	4	6	2	2	0.6	8.6254	1.1176	0.87715	NaN	NaN	0.94495	1.3598	NaN	NaN
A0A0A6YYA0	Transmembrane emp24 domain-containing protein 7	TMED7-TICAM2	5	5	0	0	5	5	0	0	32.4	37.351	0.9889	1.0025	NaN	NaN	0.84894	1.0029	NaN	NaN
E5RIS5	Golgi apparatus membrane protein TVP23 homolog;Golgi apparatus membrane protein TVP23 homolog C;Golgi apparatus membrane protein TVP23 homolog B	TVP23C	1	1	0	0	1	1	0	0	73	4.7228	NaN	NaN	NaN	NaN	NaN	NaN	NaN	NaN
A0A0A6YYC7	E3 ubiquitin-protein ligase ZFP91	ZFP91-CNTF	1	1	0	0	1	1	0	0	4.7	4.9335	NaN	NaN	NaN	NaN	NaN	NaN	NaN	NaN
H0YC55	Condensin-2 complex subunit H2	NCAPH2	1	1	0	0	1	1	0	0	7.1	3.1118	NaN	NaN	NaN	NaN	NaN	NaN	NaN	NaN
A0A0A6YYH1	Arpin	C15orf38-AP3S2	2	1	0	0	2	1	0	0	10.2	8.1329	0.45955	NaN	NaN	NaN	0.5389	NaN	NaN	NaN
A0A0A6YYI3	Suppressor of SWI4 1 homolog	PPAN-P2RY11	1	2	1	1	1	2	1	1	12.9	8.7265	NaN	1.3083	1.1857	1.2691	NaN	1.0969	1.0054	1.0517
A0A0A6YYJ8	UPF0562 protein C7orf55;Putative RNA-binding protein Luc7-like 2	LUC7L2	15	14	8	11	1	1	0	0	38	2.6412	0.81919	NaN	NaN	NaN	0.56614	NaN	NaN	NaN
A0A0A6YYL2	Sulfotransferase;Sulfotransferase 1A4;Sulfotransferase 1A3;Sulfotransferase 1A1;Sulfotransferase 1A2	SULT1A4	3	3	0	0	3	3	0	0	19.6	10.722	1.0283	0.61643	NaN	NaN	0.89927	1.0879	NaN	NaN
A0A0A6YYL4	Coronin;Coronin-7;Mitochondrial import inner membrane translocase subunit TIM16	CORO7-PAM16	2	2	0	0	2	2	0	0	3.4	17.73	1.0288	1.3031	NaN	NaN	1.0674	1.2015	NaN	NaN
A0A0B4J1S8	Phosphatidylinositol 4-kinase beta	PI4KB	1	2	0	0	1	2	0	0	3.7	5.4184	NaN	1.0407	NaN	NaN	NaN	0.77521	NaN	NaN
B4DDR8	Mediator of RNA polymerase II transcription subunit 24	MED24	1	1	0	0	1	1	0	0	4.7	3.8332	NaN	NaN	NaN	NaN	NaN	NaN	NaN	NaN
H7C1G2	Cordon-bleu protein-like 1	COBLL1	2	2	0	0	2	2	0	0	7.8	3.1576	1.3101	1.2619	NaN	NaN	1.3191	1.1222	NaN	NaN
A0A0B4J2A0	Sedoheptulokinase	TRPV1	1	0	0	0	1	0	0	0	2.5	2.1603	NaN	NaN	NaN	NaN	NaN	NaN	NaN	NaN
A0A0B4J2B4		RPS15	4	6	3	3	0	1	0	0	68.6	-2	NaN	NaN	NaN	NaN	NaN	NaN	NaN	NaN	+
A0A0B4J2E5	Periodic tryptophan protein 2 homolog	PWP2	7	7	4	8	6	6	2	6	14	41.858	0.95648	1.1391	0.96053	1.2074	0.96054	0.83159	0.95888	0.96327
A0A0C4DFL7	Lanosterol 14-alpha demethylase	CYP51A1	12	11	0	0	12	11	0	0	38.3	70.916	2.2893	1.059	NaN	NaN	1.0672	2.2026	NaN	NaN
A0A0C4DFM1	Transmembrane 9 superfamily member 4	TM9SF4	5	6	0	0	5	6	0	0	15.2	24.813	1.0168	1.2002	NaN	NaN	1.1746	0.71722	NaN	NaN
A0A0C4DFN3	Monoglyceride lipase	MGLL	1	2	0	0	1	2	0	0	14.7	4.1473	NaN	0.87818	NaN	NaN	NaN	1.1	NaN	NaN
A0A0C4DFX9	Negative elongation factor A	NELFA	6	4	0	0	6	4	0	0	19.3	22.36	1.0545	1.1454	NaN	NaN	1.3419	1.1659	NaN	NaN
C9J9K3	40S ribosomal protein SA	RPSA	18	19	3	5	18	19	3	5	68.8	323.31	0.92729	0.96252	2.4046	1.5319	0.99814	1.007	0.93695	1.9497
E7ENN3	Nesprin-1	SYNE1	2	2	1	1	2	2	1	1	0.7	4.1232	NaN	NaN	1.0787	0.93735	NaN	NaN	0.96301	0.99376
A0A0C4DG44	Serine protease HTRA2, mitochondrial	HTRA2	6	4	0	0	6	4	0	0	32.4	73.747	0.6628	0.94133	NaN	NaN	0.65328	0.99335	NaN	NaN
A0A0C4DG49	Poliovirus receptor	PVR	3	3	1	1	3	3	1	1	11	8.7146	0.98734	1.0035	1.288	NaN	0.89213	1.2626	1.215	NaN
F5GYV5	ADP-ribosylation factor-like protein 6-interacting protein 4	ARL6IP4	2	2	0	0	2	2	0	0	14.7	5.393	1.1172	0.83682	NaN	NaN	0.84313	0.81609	NaN	NaN
A0A0C4DG89	Probable ATP-dependent RNA helicase DDX46	DDX46	33	30	9	10	33	30	9	10	46	146.1	0.73166	1.3847	0.80264	0.95489	1.3052	0.61095	1.1422	0.78437
A0A0C4DGA2	Enoyl-CoA delta isomerase 2, mitochondrial	ECI2	8	8	1	1	8	8	1	1	42.9	90.438	1.132	1.105	NaN	NaN	1.0561	1.083	NaN	NaN
A0A0C4DGA6	Helicase-like transcription factor	HLTF	4	2	0	0	4	2	0	0	5.4	12.305	0.96699	1.3316	NaN	NaN	1.1703	0.87655	NaN	NaN
A0A0C4DGB0	Short coiled-coil protein	SCOC	1	1	0	0	1	1	0	0	22	24.756	NaN	NaN	NaN	NaN	NaN	NaN	NaN	NaN
A0A0C4DGB5	Calpastatin	CAST	19	18	0	0	1	1	0	0	42.3	155.79	1.0622	1.0545	NaN	NaN	1.0119	1.075	NaN	NaN
A0A0C4DGC1	C-X-C motif chemokine 14	CXCL14	1	0	0	0	1	0	0	0	10.1	-2	NaN	NaN	NaN	NaN	NaN	NaN	NaN	NaN	+
A0A2R8Y425	Chromodomain-helicase-DNA-binding protein 4	CHD4	28	24	0	0	18	15	0	0	23.7	154.43	0.91645	1.0886	NaN	NaN	1.1226	0.92342	NaN	NaN
A0A0C4DGH0	CD276 antigen	CD276	1	0	0	2	1	0	0	2	11.3	6.5641	NaN	NaN	NaN	0.78328	NaN	NaN	NaN	1.3666
A0A0C4DGJ7	Protein Churchill	CHURC1	1	2	0	0	1	1	0	0	27.7	2.274	1.4505	0.61699	NaN	NaN	1.3756	1.3587	NaN	NaN
J3QRU8	ARF GTPase-activating protein GIT1	GIT1	2	1	0	0	2	0	0	0	8.5	3.309	1.948	NaN	NaN	NaN	1.4287	NaN	NaN	NaN
K7ELJ7	Calpain small subunit 1	CAPNS1	7	7	1	0	5	6	1	0	60.8	220.67	0.94827	1.0573	NaN	NaN	0.99281	1.0086	NaN	NaN
A0A0C4DGQ8	Dehydrogenase/reductase SDR family member 7B	DHRS7B	1	2	0	0	1	2	0	0	9	5.4747	NaN	1.0607	NaN	NaN	NaN	1.2545	NaN	NaN
A0A0C4DGS1	Dolichyl-diphosphooligosaccharide--protein glycosyltransferase 48 kDa subunit	DDOST	12	13	0	0	12	13	0	0	42.8	323.31	1.0534	1.0859	NaN	NaN	0.95511	1.0326	NaN	NaN
A0A0C4DGS9	Choline/ethanolaminephosphotransferase 1	CEPT1	1	1	0	0	1	1	0	0	3.9	2.6113	NaN	NaN	NaN	NaN	NaN	NaN	NaN	NaN
A0A3B3IRK3	NEDD4 family-interacting protein 2	NDFIP2	2	2	0	1	2	2	0	1	18.6	26.173	1.0485	0.86285	NaN	0.7304	0.81664	1.2315	NaN	1.1204
A0A590UJ21	Cullin-1	CUL1	12	13	0	0	12	13	0	0	27	31.219	0.92544	1.1088	NaN	NaN	1.0218	0.98512	NaN	NaN
A0A0D9SEM4	Serine/arginine-rich splicing factor 4	SRSF4	6	6	8	8	2	2	3	3	23.3	11.974	1.2707	1.2326	1.1334	1.1103	1.3149	1.2575	1.1053	1.2825
A0A0D9SES8	Transducin-like enhancer protein 3	TLE3	6	9	0	0	4	6	0	0	23.8	45.819	0.88201	1.1052	NaN	NaN	1.1556	0.80597	NaN	NaN
A0A0D9SEU5	Ran-binding protein 10	RANBP10	1	1	0	0	1	1	0	0	2.1	2.445	NaN	NaN	NaN	NaN	NaN	NaN	NaN	NaN
E7ENQ1	Mitogen-activated protein kinase kinase kinase kinase 4	MAP4K4	3	1	0	0	2	0	0	0	4.3	3.9349	0.85969	NaN	NaN	NaN	1.0546	NaN	NaN	NaN
A0A0D9SFB3	ATP-dependent RNA helicase DDX3X;ATP-dependent RNA helicase DDX3Y	DDX3X	37	35	17	19	36	34	16	18	65.6	323.31	0.9088	0.88736	1.354	0.95506	0.91957	0.9037	0.8631	1.2941
A0A0D9SF70	ADP-ribosylation factor GTPase-activating protein 2	ARFGAP2	4	2	0	0	4	2	0	0	16.1	16.146	0.85811	0.7948	NaN	NaN	0.83378	0.72811	NaN	NaN
A0A0D9SFB1	Dynamin-1	DNM1	9	7	0	0	1	1	0	0	13.1	4.4535	0.69826	NaN	NaN	NaN	0.80322	NaN	NaN	NaN
H3BR00	Battenin	CLN3	0	0	0	2	0	0	0	2	24.5	3.9489	NaN	NaN	NaN	0.62589	NaN	NaN	NaN	0.72413
A0A0D9SFJ1	Ubiquinone biosynthesis monooxygenase COQ6, mitochondrial	COQ6	1	1	0	0	1	1	0	0	4.3	4.4697	NaN	NaN	NaN	NaN	NaN	NaN	NaN	NaN
A0A0D9SG71	Ubiquitin-conjugating enzyme E2 A	UBE2A	1	1	0	0	1	1	0	0	8.4	10.97	NaN	NaN	NaN	NaN	NaN	NaN	NaN	NaN
A0A1B0GWF2	Syntaxin-binding protein 1	STXBP1	4	3	0	0	4	3	0	0	12.9	17.363	1.2028	0.96511	NaN	NaN	0.81627	1.2106	NaN	NaN
A0A0D9SG77	Ubiquitin-protein ligase E3A	UBE3A	3	2	0	0	3	2	0	0	6.9	7.2691	1.0681	0.82266	NaN	NaN	1.116	0.94153	NaN	NaN
A0A0D9SGE8	PHD finger protein 6	PHF6	7	6	0	0	7	6	0	0	30.6	24.146	0.88574	1.1388	NaN	NaN	1.108	1.0151	NaN	NaN
A0A1B0GW29	Sodium/hydrogen exchanger 6	SLC9A6	1	1	0	1	1	1	0	1	7.1	3.1736	NaN	NaN	NaN	0.60341	NaN	NaN	NaN	0.9228
A0A0D9SGK2	Protein tyrosine phosphatase type IVA 1	PTP4A1	1	2	0	0	0	1	0	0	29.1	4.3832	NaN	NaN	NaN	NaN	NaN	NaN	NaN	NaN
A0A0G2JH68	Protein diaphanous homolog 1	DIAPH1	20	22	0	0	20	22	0	0	25.3	155.85	1.0063	1.004	NaN	NaN	0.94858	0.94132	NaN	NaN
A0A0G2JHC2	Phostensin	PPP1R18	4	6	0	0	4	6	0	0	18.8	13.916	0.97753	0.81352	NaN	NaN	0.95963	1.0626	NaN	NaN
U3KQA6	Bromodomain-containing protein 2	BRD2	2	1	0	1	1	0	0	1	8.9	-2	NaN	NaN	NaN	NaN	NaN	NaN	NaN	NaN	+
A0A0G2JI89	Abhydrolase domain-containing protein 16A	ABHD16A	1	1	1	1	1	1	1	1	8	3.1631	NaN	NaN	0.12772	NaN	NaN	NaN	4.4474	NaN
A0A0G2JIW1	Heat shock 70 kDa protein 1B;Heat shock 70 kDa protein 1A	HSPA1B	44	46	6	10	6	6	0	0	63.9	323.31	0.84708	0.88933	2.9147	0.96094	0.89984	0.87735	0.91435	3.1333
A2ACR1	Proteasome subunit beta type;Proteasome subunit beta type-9	PSMB9	1	2	0	0	1	2	0	0	11.2	15.181	NaN	NaN	NaN	NaN	NaN	NaN	NaN	NaN
A0A0G2JLH9			0	1	0	0	0	1	0	0	100	-2	NaN	NaN	NaN	NaN	NaN	NaN	NaN	NaN	+
A0A0G2JNZ2	Protein scribble homolog	SCRIB	9	10	0	0	8	9	0	0	13.9	84.457	0.88358	1.1405	NaN	NaN	1.0058	0.96855	NaN	NaN
A0A0G2JQ62	Lysophosphatidylcholine acyltransferase 1	LPCAT1	2	3	0	0	2	3	0	0	12.1	5.7854	0.62377	1.3953	NaN	NaN	0.96956	0.75319	NaN	NaN
A0A0G2JR96			10	9	1	1	1	1	0	0	16	10.607	1.6742	0.60964	NaN	NaN	1.3467	0.50447	NaN	NaN
A0A0G2JRD1	RNA binding protein fox-1 homolog;RNA binding protein fox-1 homolog 2;RNA binding protein fox-1 homolog 1	RBFOX2	1	2	1	4	1	1	0	2	25.1	21.145	NaN	1.1139	1.1233	1.1367	NaN	1.6359	1.0226	1.8065
A0A2R8YEE8	SWI/SNF-related matrix-associated actin-dependent regulator of chromatin subfamily B member 1	SMARCB1	2	2	0	0	2	2	0	0	18.1	4.5946	NaN	1.0621	NaN	NaN	NaN	0.90973	NaN	NaN
A0A0J9YVX5	Golgi-associated PDZ and coiled-coil motif-containing protein	GOPC	1	0	0	0	1	0	0	0	7.7	2.7932	NaN	NaN	NaN	NaN	NaN	NaN	NaN	NaN
A0A0J9YX62	DnaJ homolog subfamily B member 6	DNAJB6	4	3	0	0	3	2	0	0	19.5	17.043	0.97595	0.83317	NaN	NaN	0.7992	0.91064	NaN	NaN
Q5VZZ6	CUGBP Elav-like family member 2	CELF2	4	4	3	3	2	2	1	1	11.6	6.1845	NaN	0.50151	0.85449	0.92427	NaN	0.68295	1.1283	0.85672
A0A0J9YXF2	Serum paraoxonase/arylesterase 2	PON2	8	6	0	0	8	6	0	0	38.9	90.415	1.0594	0.83563	NaN	NaN	0.92226	1.1336	NaN	NaN
A0A0J9YYF7	Disheveled-associated activator of morphogenesis 2	DAAM2	1	0	1	1	1	0	1	1	4.8	2.5072	NaN	NaN	NaN	NaN	NaN	NaN	NaN	NaN
A0A0R4J2E8	Matrin-3	MATR3	36	32	32	31	36	32	32	31	60	323.31	0.93791	1.0842	1.0078	1.1181	1.0687	0.93664	1.0317	0.945
A0A0S2Z4R8	Antigen peptide transporter 1	TAP1	2	1	1	0	2	1	1	0	22.6	26.445	0.84064	NaN	NaN	NaN	0.87043	NaN	NaN	NaN
A0A1B0GW73	Ceroid-lipofuscinosis neuronal protein 6	CLN6	1	1	0	0	1	1	0	0	27.3	2.5373	NaN	NaN	NaN	NaN	NaN	NaN	NaN	NaN
A0A3B3ITY2	Gigaxonin	GAN	1	1	0	0	1	1	0	0	24.1	11.01	NaN	0.80714	NaN	NaN	NaN	0.77228	NaN	NaN
E3W994	CLIP-associating protein 2	CLASP2	6	7	0	0	1	1	0	0	8	17.498	0.95172	0.99261	NaN	NaN	0.85368	0.85202	NaN	NaN
F8VSC5	SCY1-like protein 2	SCYL2	2	4	0	0	2	4	0	0	9.7	10.987	0.99594	0.88633	NaN	NaN	1.1509	0.80867	NaN	NaN
A0A0U1RQV4	Rho-associated protein kinase 1	ROCK1	9	7	0	0	4	2	0	0	11.4	4.9522	0.99251	0.96579	NaN	NaN	1.0195	1.1663	NaN	NaN
A0A0U1RR32	Histone H2A type 1-J;Histone H2A type 1-H;Histone H2A.J;Histone H2A type 1-D;Histone H2A type 1;Histone H2A;Histone H2AX;Histone H2A type 1-A	HIST1H2AJ	8	7	3	2	0	0	0	0	44.4	141.1	0.71106	0.91343	NaN	NaN	1.0082	0.6386	NaN	NaN
A0A0U1RR85	Receptor expression-enhancing protein 3	REEP3	1	1	0	0	1	1	0	0	11.9	2.0443	NaN	NaN	NaN	NaN	NaN	NaN	NaN	NaN
S4R3D7	Calcium uptake protein 1, mitochondrial	MICU1	2	1	0	0	2	1	0	0	12.3	5.3215	1.2726	NaN	NaN	NaN	1.1184	NaN	NaN	NaN
A0A0U1RRL7			1	2	0	0	1	2	0	0	74.6	4.6419	NaN	0.62158	NaN	NaN	NaN	0.88241	NaN	NaN
A0A0U1RRM1	Transcriptional repressor p66-beta	GATAD2B	7	7	0	0	6	7	0	0	20.6	21.308	0.80636	1.0241	NaN	NaN	0.90742	0.91604	NaN	NaN
A0A0U1RRM6	Protein enabled homolog	ENAH	13	12	0	0	13	12	0	0	26.6	93.503	0.98509	0.96554	NaN	NaN	0.94794	0.99878	NaN	NaN
A0A140T912		HLA-C	14	14	5	4	0	0	0	0	49.7	323.31	1.0633	0.82274	1.6409	0.89178	0.8346	1.0625	0.81654	1.301
A0A140T9I0		HLA-A	12	12	4	4	5	5	0	1	39.2	135.73	1.0995	0.94927	NaN	1.1071	0.8751	1.2242	NaN	1.3118
A0A140TA13			9	8	3	2	0	0	0	0	40.2	2.6434	NaN	NaN	NaN	NaN	NaN	NaN	NaN	NaN
A0A140TA14			5	4	2	1	1	0	0	0	33	-2	NaN	NaN	NaN	NaN	NaN	NaN	NaN	NaN	+
Q5JNW7	Proteasome subunit beta type;Proteasome subunit beta type-8	PSMB8	4	3	0	0	4	3	0	0	18.3	17.933	1.1896	0.89171	NaN	NaN	0.82916	1.2815	NaN	NaN
A0A140T9J9	HLA class I histocompatibility antigen, Cw-7 alpha chain	HLA-C	13	13	4	3	0	0	0	0	46.8	10.49	NaN	NaN	NaN	NaN	NaN	NaN	NaN	NaN
A0A140T9M0			11	11	2	2	0	0	0	0	34.1	21.251	1.1671	0.89261	NaN	NaN	0.90825	1.1066	NaN	NaN
A0A140TA05			8	9	2	1	0	1	0	0	45.1	-2	NaN	NaN	NaN	NaN	NaN	NaN	NaN	NaN	+
A0A140TA09	E3 ubiquitin-protein ligase RNF5	RNF5	1	1	0	0	1	1	0	0	16.5	13.484	NaN	NaN	NaN	NaN	NaN	NaN	NaN	NaN
F6UJC5		DDX39B	11	11	1	1	1	0	0	1	45.3	-2	NaN	NaN	NaN	NaN	NaN	NaN	NaN	NaN	+
A0A1B0GW13	Renin receptor	ATP6AP2	3	2	0	0	3	2	0	0	23.7	25.535	0.84635	0.97533	NaN	NaN	0.79389	1.1385	NaN	NaN
A0A1B0GTB8	Carnitine O-palmitoyltransferase 2, mitochondrial	CPT2	12	8	0	0	12	8	0	0	28.2	42.299	0.52054	1.1268	NaN	NaN	1.0175	0.45783	NaN	NaN
A0A1B0GTY1	Alpha-ketoglutarate-dependent dioxygenase FTO	FTO	1	2	0	0	1	2	0	0	4.5	2.8597	0.79825	1.0368	NaN	NaN	1.223	0.78814	NaN	NaN
A0A1B0GTU1			3	2	1	1	1	0	0	0	6.5	2.9741	NaN	NaN	NaN	NaN	NaN	NaN	NaN	NaN
A0A1B0GTU4	Paxillin	PXN	13	10	0	0	13	10	0	0	19.5	63.951	1.1252	1.2296	NaN	NaN	1.1161	1.3007	NaN	NaN
A0A1B0GU48	Histone-lysine N-methyltransferase EHMT1	EHMT1	3	2	0	0	2	1	0	0	8.1	4.2875	1.0897	NaN	NaN	NaN	0.90162	NaN	NaN	NaN
A0A1B0GU86	Aminoacylase-1	ACY1	6	4	0	0	6	4	0	0	25.7	14.271	0.62594	0.60967	NaN	NaN	0.59118	0.63949	NaN	NaN
A0A1B0GUA3	KIF1-binding protein	KIAA1279	6	3	0	0	6	3	0	0	13	9.382	0.90231	0.97294	NaN	NaN	0.9945	0.80785	NaN	NaN
G3V144	SH3 and PX domain-containing protein 2B	SH3PXD2B	0	1	0	0	0	1	0	0	2.6	2.3628	NaN	NaN	NaN	NaN	NaN	NaN	NaN	NaN
A0A1B0GUF4	Ecotropic viral integration site 5 protein homolog	EVI5	1	1	0	0	1	1	0	0	8.3	2.875	NaN	NaN	NaN	NaN	NaN	NaN	NaN	NaN
A0A1B0GUN5	Pleckstrin homology domain-containing family A member 6	PLEKHA6	1	4	0	0	1	4	0	0	5	3.6571	NaN	1.281	NaN	NaN	NaN	1.9301	NaN	NaN
A0A1B0GW44	Cathepsin D;Cathepsin D light chain;Cathepsin D heavy chain	CTSD	14	14	0	0	14	14	0	0	42	118.73	0.93572	0.99544	NaN	NaN	1.0066	0.95165	NaN	NaN
A0A1B0GWJ0	Adenylosuccinate lyase	ADSL	10	12	1	1	10	12	1	1	43.5	263.05	0.98161	1.0963	NaN	NaN	1.0803	1.0234	NaN	NaN
F6WST4	ORM1-like protein 1;ORM1-like protein 2	ORMDL1	1	1	0	0	1	1	0	0	13.9	16.392	NaN	1.2803	NaN	NaN	NaN	0.76863	NaN	NaN
A0A1C7CYW8	Dynein heavy chain 10, axonemal	DNAH10	1	1	1	0	1	1	1	0	1	2.3434	NaN	NaN	NaN	NaN	NaN	NaN	NaN	NaN
A0A1C7CYX9	Dihydropyrimidinase-related protein 2	DPYSL2	26	24	2	1	22	22	2	1	60	323.31	1.1362	1.0965	NaN	NaN	0.99328	1.0459	NaN	NaN
A0A1W2PQ52	GPI transamidase component PIG-T	PIGT	1	2	0	0	1	2	0	0	8.5	3.7843	NaN	0.75103	NaN	NaN	NaN	0.96221	NaN	NaN
A0A1W2PNV4			14	13	0	0	0	0	0	0	31	59.471	0.9754	1.0475	NaN	NaN	1.0178	0.9236	NaN	NaN
A0A1W2PNW2	Elongator complex protein 4	ELP4	1	1	0	0	1	1	0	0	9.4	2.2266	NaN	1.027	NaN	NaN	NaN	0.97273	NaN	NaN
A0A1X7SBU8	Golgi SNAP receptor complex member 2	GOSR2	2	3	0	0	2	3	0	0	21.1	16.567	1.41	1.1621	NaN	NaN	0.77533	1.7182	NaN	NaN
A0A1W2PQT3	NAD-dependent malic enzyme, mitochondrial	ME2	6	5	0	0	6	5	0	0	20.7	111.05	0.97282	0.99015	NaN	NaN	1.0518	1.0261	NaN	NaN
A0A1W2PPJ4		C2orf81	0	0	1	1	0	0	1	1	5	-2	NaN	NaN	NaN	NaN	NaN	NaN	NaN	NaN	+
A0A1W2PPR8	HLA class I histocompatibility antigen, B-7 alpha chain	HLA-B	10	8	2	2	0	0	0	0	32	171.55	1.0545	0.77491	1.3759	0.95366	0.85203	1.0633	0.88078	1.344
A0A1W2PPZ5	Transcription elongation factor A protein 1	TCEA1	10	8	1	1	10	8	1	1	42.9	163.5	0.91585	1.0214	NaN	0.077007	0.99859	0.83858	NaN	0.12025
A0A1X7SBZ2	Probable ATP-dependent RNA helicase DDX17	DDX17	39	40	30	31	28	29	19	20	52.7	323.31	1.2723	0.84838	1.32	0.88216	0.80478	1.2886	0.80391	1.2655
A0A1W2PQ63	Pleckstrin homology-like domain family B member 2	PHLDB2	2	0	0	0	2	0	0	0	3.4	3.1291	NaN	NaN	NaN	NaN	NaN	NaN	NaN	NaN
A0A1W2PR06	Cationic amino acid transporter 2	SLC7A2	2	3	2	2	2	3	2	2	6.1	6.7028	0.85711	0.62639	0.69591	0.51717	0.86443	0.84357	0.75958	0.87826
F2Z2I2	6-phosphofructo-2-kinase/fructose-2,6-bisphosphatase 3;6-phosphofructo-2-kinase;Fructose-2,6-bisphosphatase	PFKFB3	3	0	1	1	3	0	1	1	13.8	2.7544	NaN	NaN	2.0809	1.9042	NaN	NaN	1.895	1.4989
A0A1W2PRB8			2	2	0	0	1	1	0	0	5	9.8347	0.76772	1.0324	NaN	NaN	1.0058	0.67393	NaN	NaN
A0A1W2PRC7	G-protein coupled receptor 98	GPR98	0	2	1	1	0	2	1	1	2.3	3.0317	NaN	NaN	0.90188	1.2078	NaN	NaN	0.8647	0.88495
B4DP61	Survival motor neuron protein	SMN2	3	3	0	0	3	3	0	0	25.1	10.124	0.92951	0.84354	NaN	NaN	0.85572	1.1329	NaN	NaN
Q5SRN7	HLA class I histocompatibility antigen, A-3 alpha chain	HLA-A	7	7	5	4	1	1	0	0	34.1	12.209	1.2525	0.94236	NaN	NaN	0.88852	1.1997	NaN	NaN
A0A1W2PS43	Lysosome membrane protein 2	SCARB2	4	5	7	11	4	5	7	11	31.2	80.797	1.1927	1.2398	1.123	0.90104	1.0261	1.0843	0.95144	1.0992
A0A286YEX4	Nuclear factor 1 C-type	NFIC	1	2	0	0	1	2	0	0	7.9	14.134	NaN	0.9169	NaN	NaN	NaN	0.80427	NaN	NaN
D6RB36	Anaphase-promoting complex subunit 10	ANAPC10	2	1	0	0	2	1	0	0	52.9	3.3215	0.33824	NaN	NaN	NaN	0.82269	NaN	NaN	NaN
A0A286YF22	D-3-phosphoglycerate dehydrogenase	PHGDH	26	30	8	13	26	30	8	13	71.1	323.31	1.1113	1.0844	3.2247	1.4375	1.0553	1.0549	0.95618	2.7733
A0A286YF37	F-box only protein 2	FBXO2	13	12	0	0	13	12	0	0	64.6	140.89	0.99191	0.97593	NaN	NaN	0.88552	0.95312	NaN	NaN
A0A286YFD1	Fer-1-like protein 5	FER1L5	1	2	0	1	1	2	0	1	3	3.0039	NaN	0.64055	NaN	NaN	NaN	0.84287	NaN	NaN
A0A2C9F2P4	Palmitoyl-protein thioesterase 1	PPT1	3	3	0	0	3	3	0	0	24.3	36.292	1.0363	1.2272	NaN	NaN	1.1238	0.88662	NaN	NaN
A0A286YFF8	Protein MON2 homolog	MON2	1	2	0	0	1	2	0	0	1.6	9.9077	NaN	0.93577	NaN	NaN	NaN	0.70152	NaN	NaN
A0A2Q2TH77	Golgin subfamily A member 2	GOLGA2	10	9	1	2	9	8	1	1	20.7	106.05	0.91513	1.18	NaN	1.2898	0.87632	1.0888	NaN	2.7541
C9JW07	LisH domain-containing protein ARMC9	ARMC9	1	1	0	0	1	1	0	0	9	7.1834	NaN	NaN	NaN	NaN	NaN	NaN	NaN	NaN
Q5SWX3	Calcium/calmodulin-dependent protein kinase type II subunit gamma;Calcium/calmodulin-dependent protein kinase type II subunit beta	CAMK2G	5	4	0	0	3	2	0	0	14.1	8.2059	1.1008	NaN	NaN	NaN	1.042	NaN	NaN	NaN
A0A2R8Y3N3	Probable histidine--tRNA ligase, mitochondrial	HARS2	7	5	0	0	3	0	0	0	19.2	3.3993	0.76308	NaN	NaN	NaN	1.6177	NaN	NaN	NaN
A6NNI4	Tetraspanin;CD9 antigen	CD9	2	2	0	0	2	2	0	0	22	101.96	1.077	1.0854	NaN	NaN	1.0704	1.1512	NaN	NaN
A0A2R8YFC9	Spastin	SPAST	1	0	0	0	1	0	0	0	8.4	3.029	NaN	NaN	NaN	NaN	NaN	NaN	NaN	NaN
A0A2R8Y484	Leukocyte surface antigen CD47	CD47	3	2	3	3	3	2	3	3	15.3	5.7912	0.92583	1.0418	0.87066	0.76237	0.96229	0.89103	0.97914	0.89428
A0A2R8YFK2	Breast cancer anti-estrogen resistance protein 1	BCAR1	1	1	0	0	1	1	0	0	4.1	2.9451	NaN	NaN	NaN	NaN	NaN	NaN	NaN	NaN
A0A2R8Y4R4	Plasma membrane calcium-transporting ATPase 2	ATP2B2	7	6	0	0	1	1	0	0	9	10.836	NaN	NaN	NaN	NaN	NaN	NaN	NaN	NaN
A0A2R8Y765	SWI/SNF-related matrix-associated actin-dependent regulator of chromatin subfamily E member 1	SMARCE1	5	3	0	0	5	3	0	0	24.9	37.039	0.96903	1.1182	NaN	NaN	1.3374	1.0904	NaN	NaN
A0A2R8Y4W2	Epidermal growth factor receptor kinase substrate 8	EPS8	1	0	0	0	1	0	0	0	3.3	3.2315	NaN	NaN	NaN	NaN	NaN	NaN	NaN	NaN
A0A2R8Y549	InaD-like protein	INADL	2	1	0	0	2	1	0	0	1.8	4.4007	1.3241	NaN	NaN	NaN	1.0815	NaN	NaN	NaN
A0A2R8Y595	Transcriptional repressor CTCF	CTCF	4	2	0	0	3	2	0	0	11.6	87.125	1.1174	1.1434	NaN	NaN	1.1543	1.2973	NaN	NaN
H0YH87	Ataxin-2	ATXN2	13	12	1	1	12	11	0	0	32.3	57.495	1.2653	1.0317	NaN	NaN	1.0125	1.2695	NaN	NaN
A0A2R8YEM0	tRNA-splicing endonuclease subunit Sen15	TSEN15	2	2	0	0	2	2	0	0	89.1	13.783	1.0642	1.3621	NaN	NaN	1.3195	0.93286	NaN	NaN
A0A2U3TZJ6	Tubulin-specific chaperone E	TBCE	4	5	0	0	4	5	0	0	18.1	19.915	0.9891	1.0721	NaN	NaN	1.1759	0.90172	NaN	NaN
A0A2R8Y5V9			25	28	1	2	1	1	0	0	71	4.3073	NaN	NaN	NaN	NaN	NaN	NaN	NaN	NaN
A0A2R8Y5Y7			15	12	1	0	0	1	0	0	68.2	-2	NaN	NaN	NaN	NaN	NaN	NaN	NaN	NaN	+
A0A2R8Y623			14	14	1	1	1	1	0	0	68	2.7788	NaN	NaN	NaN	NaN	NaN	NaN	NaN	NaN
A0A2U3TZN6	Peripheral plasma membrane protein CASK	CASK	6	4	0	0	6	4	0	0	10	13.342	1.0326	1.0444	NaN	NaN	1.0491	0.85792	NaN	NaN
A0A2R8Y7W8	Male-enhanced antigen 1	MEA1	1	1	0	0	1	1	0	0	7.6	2.3357	NaN	1.0889	NaN	NaN	NaN	0.82679	NaN	NaN
A0A2R8YDQ9	Succinyl-CoA ligase [ADP-forming] subunit beta, mitochondrial	SUCLA2	9	8	0	0	9	8	0	0	24.4	59.773	1.2365	1.2933	NaN	NaN	1.1324	0.97834	NaN	NaN
A0A2R8Y793			36	38	21	23	1	0	0	0	94.2	-2	NaN	NaN	NaN	NaN	NaN	NaN	NaN	NaN	+
A0A2R8Y7M0	TATA element modulatory factor	TMF1	7	5	0	1	7	5	0	1	8.2	23.702	1.2263	0.88981	NaN	NaN	0.89063	0.94052	NaN	NaN
A0A2R8Y7R9	Liprin-alpha-1	PPFIA1	9	7	0	0	7	6	0	0	13.5	44.825	1.0513	1.1091	NaN	NaN	1.1108	1.0323	NaN	NaN
C9JAS4	Mitochondrial chaperone BCS1	BCS1L	0	1	0	0	0	1	0	0	13.6	3.4153	NaN	NaN	NaN	NaN	NaN	NaN	NaN	NaN
A0A2R8Y811	40S ribosomal protein S14	RPS14	10	11	3	3	10	11	3	3	70.7	323.31	0.92275	0.99517	1.437	1.0331	0.99392	0.99688	0.92631	1.2379
A0A2R8Y840	Chromodomain-helicase-DNA-binding protein 8	CHD8	1	1	1	0	1	1	1	0	1.8	4.0908	NaN	NaN	NaN	NaN	NaN	NaN	NaN	NaN
E7ETK0	40S ribosomal protein S24	RPS24	6	6	2	5	6	6	2	5	36.6	41.384	1.033	1.017	0.91955	0.72841	1.0602	0.99042	0.84061	0.84515
A0A2R8Y852	Homeobox protein cut-like 1;Protein CASP	CUX1	5	5	0	0	5	5	0	0	6.9	12.955	0.55518	0.89852	NaN	NaN	0.75318	0.68627	NaN	NaN
A0A2R8Y880	E3 ubiquitin-protein ligase RBBP6	RBBP6	3	1	0	0	3	1	0	0	2.2	7.0729	NaN	NaN	NaN	NaN	NaN	NaN	NaN	NaN
A0A2R8Y891	ATP-dependent 6-phosphofructokinase, muscle type	PFKM	20	17	0	0	18	14	0	0	33.9	162.87	1.0086	0.92976	NaN	NaN	1.0136	0.95811	NaN	NaN
Q4VB86	Protein 4.1	EPB41	4	3	0	0	4	3	0	0	14.3	12.454	0.89648	NaN	NaN	NaN	0.75159	NaN	NaN	NaN
A0A2R8YGD1	Tripeptidyl-peptidase 1	TPP1	2	2	0	0	2	2	0	0	6	5.7357	NaN	0.91318	NaN	NaN	NaN	0.81953	NaN	NaN
A0A2R8YD50	Peroxisomal multifunctional enzyme type 2;(3R)-hydroxyacyl-CoA dehydrogenase;Enoyl-CoA hydratase 2	HSD17B4	32	29	0	0	32	29	0	0	57.5	323.31	1.0911	1.0291	NaN	NaN	0.93758	1.0445	NaN	NaN
F8W1P7	Natural resistance-associated macrophage protein 2	SLC11A2	2	3	1	1	2	3	1	1	10	10.149	1.8259	1.0835	1.8401	NaN	0.86991	1.7115	0.85007	NaN
A0A2R8YDQ0	Vacuolar protein sorting-associated protein 33B	VPS33B	3	4	0	0	3	4	0	0	12.7	11.951	0.84964	1.3406	NaN	NaN	1.246	2.404	NaN	NaN
A0A2R8YEA7			18	18	7	8	2	1	0	0	84.1	20.864	NaN	NaN	NaN	NaN	NaN	NaN	NaN	NaN
A0A2R8YEM9	TPR and ankyrin repeat-containing protein 1	TRANK1	2	1	0	0	2	1	0	0	2.4	2.1348	NaN	NaN	NaN	NaN	NaN	NaN	NaN	NaN
A0A2R8YEZ7	1-acylglycerol-3-phosphate O-acyltransferase ABHD5	ABHD5	2	0	0	0	2	0	0	0	13.6	4.1354	0.41768	NaN	NaN	NaN	1.0898	NaN	NaN	NaN
A0A2R8YF49	Rho guanine nucleotide exchange factor 5	ARHGEF5	3	3	0	0	3	3	0	0	3.6	4.8162	0.94826	1.6952	NaN	NaN	0.86922	1.1763	NaN	NaN
H3BMM5	Vacuolar protein sorting-associated protein 33A	VPS33A	3	2	0	0	3	2	0	0	11.3	6.1456	1.0301	0.90727	NaN	NaN	0.96342	0.78931	NaN	NaN
A0A2R8YFH5	Protein transport protein Sec23B	SEC23B	15	15	0	1	13	12	0	1	36.2	205.58	0.90152	0.91754	NaN	NaN	0.88585	0.91734	NaN	NaN
A0A2R8YFV2	Protein Wiz	WIZ	2	2	0	0	2	2	0	0	2	2.9203	1.0669	0.94221	NaN	NaN	0.95076	0.89395	NaN	NaN
A0A2R8YG38			2	3	0	0	0	1	0	0	8.8	3.918	NaN	NaN	NaN	NaN	NaN	NaN	NaN	NaN
B1ALK7	Rho guanine nucleotide exchange factor 7	ARHGEF7	3	2	0	1	3	2	0	1	10.2	5.0612	0.90036	1.0419	NaN	NaN	1.0821	0.82374	NaN	NaN
A0A2R8YGH5	AP-1 complex subunit sigma-1A	AP1S1	1	2	0	0	1	2	0	0	15.9	54.343	0.9349	0.93604	NaN	NaN	1.064	0.97171	NaN	NaN
A0A2U3TZH3	Elongation factor 1-alpha 2	EEF1A2	24	24	9	8	8	8	1	0	74.4	133.98	0.99284	0.97192	NaN	NaN	0.66524	1.0483	NaN	NaN
E9PNW4	CD59 glycoprotein	CD59	6	5	2	2	6	5	2	2	30.6	21.16	1.155	1.0609	0.94709	0.87653	0.9713	1.0368	0.89168	0.95576
A0A2U3TZL8	Kinesin-like protein;Kinesin-like protein KIF23	KIF23	6	4	0	1	6	4	0	1	10.2	15.742	0.80076	0.77482	NaN	NaN	0.80888	0.79752	NaN	NaN
A0A2Y9D025	NADH dehydrogenase [ubiquinone] 1 alpha subcomplex subunit 6	NDUFA6	2	2	0	0	2	2	0	0	17.5	3.4381	0.77669	1.3907	NaN	NaN	0.90562	0.8236	NaN	NaN
A0A384DVU0	Neuropathy target esterase	PNPLA6	5	3	0	0	5	3	0	0	8.3	17.387	0.674	0.86407	NaN	NaN	0.64283	0.8274	NaN	NaN
A0A3B3IRI2	CTP synthase 1;CTP synthase	CTPS1	23	21	2	3	22	21	2	3	53.7	182.87	1.1244	0.975	3.5164	1.4247	0.97329	1.0562	0.68513	3.5626
A0A3B3IRI3	Tight junction protein ZO-2	TJP2	9	7	0	1	9	7	0	1	16.6	70.093	0.91294	0.86795	NaN	NaN	0.91654	1.0457	NaN	NaN
A0A3B3IRL2	Protein CREG1	CREG1	1	1	0	0	1	1	0	0	8.2	11.546	NaN	NaN	NaN	NaN	NaN	NaN	NaN	NaN
A0A3B3IRQ9	Double-stranded RNA-specific adenosine deaminase	ADAR	27	29	5	9	0	1	0	0	37.7	25.842	NaN	NaN	NaN	NaN	NaN	NaN	NaN	NaN
A0A3B3IRT3	TBC1 domain family member 4	TBC1D4	2	2	0	1	2	2	0	1	6.7	8.5942	NaN	0.90627	NaN	NaN	NaN	0.75913	NaN	NaN
C9J3L8	Translocon-associated protein subunit alpha	SSR1	5	4	1	2	5	4	1	2	21.5	88.968	1.035	1.093	NaN	1.0696	1.0267	1.0207	NaN	1.0177
A0A3B3IRV5	Heme-binding protein 1	HEBP1	3	5	0	0	3	5	0	0	32.9	62.161	0.8338	0.70328	NaN	NaN	0.74997	0.72912	NaN	NaN
B4DKB2	Endothelin-converting enzyme 1	ECE1	2	2	1	1	2	2	1	1	4.5	2.7391	0.64359	0.7969	NaN	NaN	0.62026	0.70583	NaN	NaN
A0A3B3ISG5	Insulin-degrading enzyme	IDE	17	12	0	0	17	12	0	0	25.8	69.75	0.98401	1.0511	NaN	NaN	1.0011	0.9669	NaN	NaN
A0A3B3ISL3	MFS-type transporter SLC18B1	SLC18B1	1	1	0	0	1	1	0	0	14.7	2.3105	NaN	NaN	NaN	NaN	NaN	NaN	NaN	NaN
A0A3B3ISQ4	Epidermal growth factor receptor kinase substrate 8-like protein 2	EPS8L2	9	9	0	0	9	9	0	0	16.8	28.38	0.95145	0.48257	NaN	NaN	0.57483	1.0198	NaN	NaN
A0A3B3ISR7	Probable ATP-dependent RNA helicase DDX10	DDX10	2	2	0	1	2	2	0	1	6.3	4.8182	0.86713	NaN	NaN	NaN	1.2285	NaN	NaN	NaN
A0A3B3ISV4	Vitamin K epoxide reductase complex subunit 1-like protein 1	VKORC1L1	2	2	0	0	2	2	0	0	9.4	3.0565	1.2375	0.9407	NaN	NaN	0.89316	0.96363	NaN	NaN
A0A3B3ISW7	Vacuolar protein-sorting-associated protein 36	VPS36	0	1	0	0	0	1	0	0	4.3	2.6424	NaN	NaN	NaN	NaN	NaN	NaN	NaN	NaN
A0A3B3IT54	UPF0488 protein C8orf33	C8orf33	3	3	0	0	3	3	0	0	21.2	33.634	1.2141	1.0881	NaN	NaN	1.0598	1.1591	NaN	NaN
A0A3B3IT99	Cytochrome P450 2J2	CYP2J2	1	0	0	0	1	0	0	0	2.7	-2	NaN	NaN	NaN	NaN	NaN	NaN	NaN	NaN	+
A0A3B3ITE9	Protein jagunal homolog 1	JAGN1	1	1	0	0	1	1	0	0	24	4.764	NaN	1.3564	NaN	NaN	NaN	0.62335	NaN	NaN
J3KT25	Protein IMPACT	IMPACT	0	1	0	0	0	1	0	0	11.7	2.1809	NaN	NaN	NaN	NaN	NaN	NaN	NaN	NaN
A0A3B3ITJ4	Heterogeneous nuclear ribonucleoprotein L	HNRNPL	29	26	18	23	1	1	1	1	80.1	3.9452	NaN	NaN	1.3897	1.4322	NaN	NaN	1.5071	1.3704
A0A3B3ITS5	DNA polymerase alpha subunit B	POLA2	5	4	0	0	5	4	0	0	14.5	13.69	0.71921	0.80884	NaN	NaN	0.7219	0.81079	NaN	NaN
A0A3B3ITU8	Inositol 1,4,5-trisphosphate receptor type 1	ITPR1	11	8	0	0	8	5	0	0	5.7	21.45	1.2103	1.0963	NaN	NaN	0.93553	0.98819	NaN	NaN
A0A3B3ITW1	Glycogen synthase kinase-3 beta	GSK3B	6	5	0	0	5	4	0	0	23.8	29.814	0.89266	0.84097	NaN	NaN	0.77336	0.92784	NaN	NaN
A0A3B3ITW3	ATP-binding cassette sub-family D member 3	ABCD3	14	16	1	0	14	16	1	0	31	191.52	1.0904	1.0188	0.78203	NaN	0.93586	0.98075	0.9329	NaN
A0A3B3IU16	BET1 homolog	BET1	1	1	0	0	1	1	0	0	12.9	2.2018	1.0997	NaN	NaN	NaN	0.94023	NaN	NaN	NaN
A0A3B3IU42	Gem-associated protein 2	GEMIN2	2	2	0	0	2	2	0	0	9.8	6.8942	NaN	0.89684	NaN	NaN	NaN	0.77129	NaN	NaN
A0A3B3IU46	RNMT-activating mini protein	FAM103A1	2	0	0	0	2	0	0	0	19.5	2.1698	1.3557	NaN	NaN	NaN	1.3604	NaN	NaN	NaN
A0A3B3IUB1	Translation initiation factor eIF-2B subunit epsilon	EIF2B5	5	5	0	0	5	5	0	0	13.7	18.283	1.0256	0.99835	NaN	NaN	1.1982	0.88486	NaN	NaN
A0A3B3IUB5	Minor histocompatibility antigen H13	HM13	6	6	0	0	6	6	0	0	21.2	107.37	0.77774	0.96243	NaN	NaN	1.0049	0.81059	NaN	NaN
A0A3B3IUC4	Alpha-galactosidase A	GLA	1	2	0	0	1	2	0	0	4.7	4.0288	NaN	1.8539	NaN	NaN	NaN	1.3249	NaN	NaN
A0A3B3IUD7	Protein RRP5 homolog	PDCD11	13	11	4	7	13	11	4	7	14.2	66.818	1.2182	0.87123	1.0471	1.1741	0.91216	0.91906	0.91894	0.9858
A0A3F2YNY6	Pre-mRNA-processing factor 40 homolog A	PRPF40A	9	7	9	11	9	7	9	11	15	57.043	0.8729	1.0327	0.90015	0.83192	0.99933	0.87167	0.96742	0.92435
A0A3F2YNY7	Porphobilinogen deaminase	HMBS	2	1	0	0	2	1	0	0	10.4	5.7673	1.0077	NaN	NaN	NaN	0.63951	NaN	NaN	NaN
A0A494C0T6	Probable palmitoyltransferase ZDHHC11B	ZDHHC11B	1	1	0	0	1	1	0	0	57.1	2.7294	NaN	NaN	NaN	NaN	NaN	NaN	NaN	NaN
A0A494C001	Putative RNA-binding protein 15	RBM15	8	5	11	16	8	5	11	16	29.4	94.281	1.1452	0.92611	1.1511	0.95194	1.4609	1.212	1.0826	1.2636
A0A494C017	Myeloid-associated differentiation marker	MYADM	2	2	0	0	2	2	0	0	27	48.912	0.82229	0.67779	NaN	NaN	0.85763	0.94431	NaN	NaN
A0A494C039	Hypoxia up-regulated protein 1	HYOU1	26	25	0	0	26	25	0	0	42.5	226.14	1.0212	0.97246	NaN	NaN	0.89038	0.98187	NaN	NaN
A0A494C0G4	Mediator of RNA polymerase II transcription subunit 19	MED19	1	1	0	0	1	1	0	0	11.4	5.0905	NaN	NaN	NaN	NaN	NaN	NaN	NaN	NaN
A0A494C1K5	Poly(A)-specific ribonuclease PARN	PARN	2	2	0	0	2	2	0	0	9	7.0439	1.5636	0.99314	NaN	NaN	0.93526	0.77464	NaN	NaN
A0A494C0R8	Clustered mitochondria protein homolog	CLUH	25	23	0	0	24	23	0	0	30.8	174.43	1.1908	0.93181	NaN	NaN	1.0024	1.207	NaN	NaN
A0A494C0X0	Tubulin-folding cofactor B	TBCB	5	4	0	0	5	4	0	0	28	20.138	1.0666	1.3553	NaN	NaN	1.051	1.1478	NaN	NaN
A0A494C0Y9			8	7	2	3	1	1	0	0	45.4	2.2622	NaN	NaN	NaN	NaN	NaN	NaN	NaN	NaN
A0A494C108	Protein KRI1 homolog	KRI1	2	4	0	0	2	4	0	0	6.8	8.1436	1.112	0.67041	NaN	NaN	0.83797	0.82846	NaN	NaN
A0A494C151			1	2	0	0	1	2	0	0	5.1	4.4698	NaN	NaN	NaN	NaN	NaN	NaN	NaN	NaN
D6RH30	Nuclear factor NF-kappa-B p105 subunit;Nuclear factor NF-kappa-B p50 subunit	NFKB1	1	1	0	0	1	1	0	0	11.6	5.2095	NaN	NaN	NaN	NaN	NaN	NaN	NaN	NaN
A0A494C169	Pantothenate kinase 4	PANK4	4	5	0	0	4	5	0	0	8.3	15.854	1.0243	0.94594	NaN	NaN	0.87252	0.87393	NaN	NaN
A0A494C1F2	Nuclear pore complex protein Nup214	NUP214	16	19	0	0	16	19	0	0	15.7	59.932	0.80427	0.94107	NaN	NaN	0.92805	0.77469	NaN	NaN
A0A494C1L1	Lamin-B receptor	LBR	6	7	0	0	6	7	0	0	21.2	52.029	0.88258	0.98623	NaN	NaN	0.8212	0.98025	NaN	NaN
A0A494C1L5	Lipopolysaccharide-responsive and beige-like anchor protein	LRBA	15	16	0	0	15	16	0	0	9.7	96.049	1.1131	1.0114	NaN	NaN	0.93316	1.0006	NaN	NaN
A0A494C1M4	Mitochondrial 10-formyltetrahydrofolate dehydrogenase	ALDH1L2	1	2	0	0	1	2	0	0	3	4.3286	NaN	2.1446	NaN	NaN	NaN	0.92688	NaN	NaN
A0A494C1N0	Peptidyl-prolyl cis-trans isomerase FKBP2	FKBP2	4	5	0	0	4	5	0	0	32.7	41.108	1.0478	0.90857	NaN	NaN	0.86557	1.0827	NaN	NaN
A0A494C1S7	General transcription factor 3C polypeptide 3	GTF3C3	3	3	0	0	3	3	0	0	12.5	6.9415	NaN	0.91115	NaN	NaN	NaN	0.91505	NaN	NaN
A0A494C1T9	Protein FAM83H	FAM83H	4	2	0	0	4	2	0	0	6.5	11.687	0.74407	0.6856	NaN	NaN	0.80552	0.83976	NaN	NaN
A0A499FI31	Squamous cell carcinoma antigen recognized by T-cells 3	SART3	12	10	1	1	12	10	1	1	23.3	165.93	1.0237	1.2061	NaN	0.83606	1.0516	0.97197	NaN	1.1772
A0A499FJN1	MAP kinase-interacting serine/threonine-protein kinase 1	MKNK1	2	3	0	0	2	3	0	0	10.9	5.8155	0.89839	1.0053	NaN	NaN	0.95175	0.94487	NaN	NaN
A0A499FIZ0	WD repeat-containing protein 26	WDR26	2	1	0	0	2	1	0	0	5.7	37.935	0.96208	NaN	NaN	NaN	1.2069	NaN	NaN	NaN
A0A499FJS4	Smoothelin-like protein 1	SMTNL1	2	1	0	0	2	1	0	0	9.4	15.015	0.6785	NaN	NaN	NaN	0.98354	NaN	NaN	NaN
H0YBA1	Pericentriolar material 1 protein	PCM1	2	2	0	0	2	2	0	0	6.5	7.4628	NaN	NaN	NaN	NaN	NaN	NaN	NaN	NaN
A0A4W8VYG7	Cell growth regulator with EF hand domain protein 1	CGREF1	2	2	0	0	2	2	0	0	19.3	31.13	0.90256	0.8679	NaN	NaN	0.87229	0.91031	NaN	NaN
A0A590UJT5	Sarcolemmal membrane-associated protein	SLMAP	1	1	0	0	1	1	0	0	10.4	2.7667	NaN	NaN	NaN	NaN	NaN	NaN	NaN	NaN
A0A590UJ49	Protein S100-A2	S100A2	1	2	0	0	1	2	0	0	27.8	4.3874	NaN	NaN	NaN	NaN	NaN	NaN	NaN	NaN
A0A590UJ73	tRNA-splicing endonuclease subunit Sen34	TSEN34	3	3	0	0	3	3	0	0	29.3	9.4218	1.2697	1.0656	NaN	NaN	1.1036	1.0002	NaN	NaN
A0A590UKB6	DNA-directed RNA polymerase II subunit RPB1	POLR2A	9	5	0	0	9	5	0	0	8.4	21.234	0.73433	0.82864	NaN	NaN	0.82218	0.77501	NaN	NaN
A0A590UK95	E3 ubiquitin-protein ligase Itchy homolog	ITCH	4	4	0	0	4	4	0	0	11	18.928	0.82382	0.87272	NaN	NaN	0.80196	1.0315	NaN	NaN
A0A590UJR4	Disks large homolog 1	DLG1	4	4	0	0	4	4	0	0	8.5	7.7155	1.0066	1.049	NaN	NaN	1.0061	1.1301	NaN	NaN
A0A590UJS4	Nipped-B-like protein	NIPBL	2	1	0	0	2	1	0	0	1.4	2.8631	0.64965	NaN	NaN	NaN	0.5748	NaN	NaN	NaN
A0A590UJT3	Telomeric repeat-binding factor 2-interacting protein 1	TERF2IP	1	2	0	0	1	2	0	0	18.4	2.1576	NaN	0.7814	NaN	NaN	NaN	0.38888	NaN	NaN
A0A590UK01	Serine/arginine-rich splicing factor 6	SRSF6	13	13	15	16	0	1	0	0	46.5	250.79	0.93007	1.1051	0.95945	0.88282	1.0425	0.90777	1.0529	0.88837
A0A5F9UJX7	45 kDa calcium-binding protein	SDF4	7	5	0	0	7	5	0	0	27.9	100.02	0.92264	1.3631	NaN	NaN	1.1596	0.85342	NaN	NaN
A0A5F9UK94	AMP deaminase 2	AMPD2	8	8	0	0	8	8	0	0	9.5	19.579	0.87897	0.81025	NaN	NaN	0.96585	0.93494	NaN	NaN
A0A5F9YFS9	Signal peptidase complex subunit 1	SPCS1	1	2	0	0	1	2	0	0	31.4	24.635	1.0613	0.98753	NaN	NaN	0.98453	1.1094	NaN	NaN
A0A5F9ZH07	Tyrosine-protein kinase JAK1	JAK1	3	1	0	0	3	1	0	0	4.8	3.8335	0.51206	NaN	NaN	NaN	0.5556	NaN	NaN	NaN
A0A5F9ZHQ0	Monoacylglycerol lipase ABHD12	ABHD12	6	6	0	0	6	6	0	0	48.6	13.208	1.1223	0.95852	NaN	NaN	0.91104	0.99614	NaN	NaN
A0A5F9ZH78	Arginase-1	ARG1	1	1	0	0	1	1	0	0	3	5.1819	0.85143	NaN	NaN	NaN	0.95996	NaN	NaN	NaN
A0A5F9ZH79	Activating signal cointegrator 1 complex subunit 1	ASCC1	1	2	0	0	1	2	0	0	6	2.1447	NaN	0.91457	NaN	NaN	NaN	0.75813	NaN	NaN
A0A5F9ZHB6	DNA primase small subunit;DNA primase	PRIM1	4	4	0	0	4	4	0	0	10.9	7.7965	0.8226	0.84654	NaN	NaN	0.88609	0.62305	NaN	NaN
A0A5F9ZHM4	L-lactate dehydrogenase B chain;L-lactate dehydrogenase	LDHB	27	27	3	3	25	25	2	3	71.3	323.31	0.95408	0.97617	4.1283	1.0622	1.0263	1.0045	0.7785	4.831
A0A5F9ZHN7	Phosphatidylinositide phosphatase SAC1	SACM1L	8	6	0	0	8	6	0	0	16.9	35.071	1.0784	1.079	NaN	NaN	0.99777	0.94669	NaN	NaN
A0A5F9ZHN9	Fatty aldehyde dehydrogenase	ALDH3A2	9	7	0	0	9	7	0	0	21.5	63.799	1.1151	1.2215	NaN	NaN	1.2772	1.012	NaN	NaN
B7Z7D2	Lysosomal acid phosphatase	ACP2	2	1	0	0	2	1	0	0	4.9	3.6084	0.81035	NaN	NaN	NaN	1.1991	NaN	NaN	NaN
A0A5F9ZHU7	DNA primase large subunit	PRIM2	5	5	0	0	5	5	0	0	18.3	23.28	0.90968	0.89628	NaN	NaN	0.8662	0.90599	NaN	NaN
A0A5F9ZHY7	BRI3-binding protein	BRI3BP	2	2	0	0	2	2	0	0	8.5	11.315	0.84778	1.0323	NaN	NaN	0.90718	0.82856	NaN	NaN
V9GYM8	Rho guanine nucleotide exchange factor 2	ARHGEF2	2	3	1	1	2	3	1	1	6.6	8.5591	0.90788	1.0522	NaN	NaN	0.65837	0.83509	NaN	NaN
A0A5F9ZI63	Polycomb protein EED	EED	3	3	0	0	3	3	0	0	7	6.6283	0.64311	1.0346	NaN	NaN	0.83892	0.63524	NaN	NaN
A0A5F9ZI66			15	15	0	1	1	0	0	0	64.9	-2	NaN	NaN	NaN	NaN	NaN	NaN	NaN	NaN	+
A0A5H1ZRP4	Negative elongation factor B	NELFB	4	4	0	0	4	4	0	0	12.9	20.904	1.0308	1.063	NaN	NaN	0.99643	0.79443	NaN	NaN
H0YH69	Ethanolamine kinase 1	ETNK1	1	0	0	0	1	0	0	0	4.9	2.2105	NaN	NaN	NaN	NaN	NaN	NaN	NaN	NaN
A0A5K1VW64	Aprataxin	APTX	2	1	1	0	2	1	1	0	13	3.1844	1.0669	NaN	NaN	NaN	0.82282	NaN	NaN	NaN
A0AV96	RNA-binding protein 47	RBM47	9	8	11	14	9	8	11	14	41	68.124	1.2252	0.88776	1.1385	1.0592	1.1115	1.1047	1.164	1.2643
A0AVT1	Ubiquitin-like modifier-activating enzyme 6	UBA6	18	18	0	0	18	18	0	0	26.3	41.023	0.88094	0.90789	NaN	NaN	0.94318	1.0031	NaN	NaN
A0MZ66	Shootin-1	KIAA1598	7	5	0	0	7	5	0	0	22.3	16.82	0.86418	0.74689	NaN	NaN	0.83642	0.90716	NaN	NaN
A1KXE4	Myelin-associated neurite-outgrowth inhibitor	FAM168B	0	1	0	0	0	1	0	0	14.6	2.079	NaN	NaN	NaN	NaN	NaN	NaN	NaN	NaN
M0R026	Acetolactate synthase-like protein	ILVBL	8	9	0	0	6	7	0	0	29.7	49.402	0.83809	0.72164	NaN	NaN	0.85325	0.73082	NaN	NaN
A2A274	Aconitate hydratase, mitochondrial	ACO2	25	19	1	1	25	19	1	1	44	247.17	1.0744	1.2862	NaN	NaN	1.0954	0.96614	NaN	NaN
A2A2Q9	Protein AAR2 homolog	AAR2	2	3	0	0	2	3	0	0	11.6	6.0469	1.0017	1.0554	NaN	NaN	1.2716	1.2011	NaN	NaN
A2A2V1	Major prion protein	PRNP	2	1	0	1	2	1	0	1	8	17.243	0.66512	NaN	NaN	NaN	0.49437	NaN	NaN	NaN
Q5TCT4	RNA-binding protein 34	RBM34	2	2	4	3	2	2	4	3	27	8.9191	0.86484	0.755	1.0894	1.1352	0.91355	0.82775	1.0287	0.89815
A2AE48	Tripartite motif-containing protein 26	TRIM26	0	2	0	0	0	2	0	0	11.7	3.3739	NaN	0.88393	NaN	NaN	NaN	0.4753	NaN	NaN
A2IDA3	DNA-3-methyladenine glycosylase	MPG	3	5	0	0	3	5	0	0	31.5	13.309	0.60552	0.73749	NaN	NaN	0.74799	0.5853	NaN	NaN
A2IDC6	39S ribosomal protein L28, mitochondrial	MRPL28	1	1	0	1	1	1	0	1	5	2.9652	1.1065	NaN	NaN	0.82231	1.0295	NaN	NaN	0.91312
A2RQR6	Transcription elongation factor A protein-like 4;Transcription elongation factor A protein-like 2	TCEAL4	2	1	0	0	2	1	0	0	12.4	4.0745	1.3009	0.93218	NaN	NaN	0.85098	0.95748	NaN	NaN
H0Y5G7	Neuroblastoma-amplified sequence	NBAS	1	2	0	0	1	2	0	0	1.3	3.8249	NaN	0.74832	NaN	NaN	NaN	0.761	NaN	NaN
A4D1E9	GTP-binding protein 10	GTPBP10	2	3	0	0	2	3	0	0	13.2	4.349	NaN	1.0371	NaN	NaN	NaN	1.075	NaN	NaN
C9J1X0	WD repeat-containing protein 91	WDR91	0	1	0	0	0	1	0	0	2.4	4.7887	NaN	NaN	NaN	NaN	NaN	NaN	NaN	NaN
A5YKK6	CCR4-NOT transcription complex subunit 1	CNOT1	19	14	0	0	19	14	0	0	12.5	57.241	1.032	1.0975	NaN	NaN	1.114	0.86844	NaN	NaN
E9PL88	Protein TSSC4	TSSC4	1	1	0	0	1	1	0	0	10	2.3785	1.1894	1.1355	NaN	NaN	1.138	1.0218	NaN	NaN
A6NDF3		PBDC1	1	0	0	0	1	0	0	0	4.7	-2	NaN	NaN	NaN	NaN	NaN	NaN	NaN	NaN	+
A6NDG6	Phosphoglycolate phosphatase	PGP	11	10	0	0	11	10	0	0	50.8	235.1	0.8348	1.0006	NaN	NaN	1.0596	0.93407	NaN	NaN
A6NDU8	UPF0600 protein C5orf51	C5orf51	3	3	0	0	3	3	0	0	14.6	12.135	0.90836	1.0866	NaN	NaN	1.04	0.95373	NaN	NaN
A6NEM5	GPI-anchor transamidase	PIGK	2	1	0	0	2	1	0	0	6.9	4.2583	1.2076	NaN	NaN	NaN	1.0439	NaN	NaN	NaN
A6NFX8	ADP-sugar pyrophosphatase	NUDT5	13	12	0	0	13	12	0	0	59.9	133.3	0.90004	1.0626	NaN	NaN	1.0556	0.89108	NaN	NaN
K7EIN1	WW domain-binding protein 2	WBP2	1	2	0	0	1	2	0	0	21.9	7.4144	0.78759	0.78996	NaN	NaN	0.81326	1.0177	NaN	NaN
E9PIZ0	Protein YIF1A	YIF1A	2	2	0	0	2	2	0	0	19.4	6.5075	0.89425	0.91451	NaN	NaN	0.85654	0.87335	NaN	NaN
A6NHN7	Zinc finger MYM-type protein 3	ZMYM3	3	0	0	0	3	0	0	0	3.5	12.815	0.62043	NaN	NaN	NaN	0.88794	NaN	NaN	NaN
C9JQD0	Quinone oxidoreductase-like protein 1	CRYZL1	0	2	0	0	0	2	0	0	36.4	12.503	NaN	NaN	NaN	NaN	NaN	NaN	NaN	NaN
A6NHL2	Tubulin alpha chain-like 3	TUBAL3	8	8	3	4	1	1	0	0	13.1	3.5342	NaN	NaN	NaN	NaN	NaN	NaN	NaN	NaN
A6NHQ2	rRNA/tRNA 2-O-methyltransferase fibrillarin-like protein 1	FBLL1	2	2	2	2	1	1	1	1	6.6	3.9874	NaN	1.0294	0.98648	0.9667	NaN	0.92058	0.88218	0.90362
A6NHR9	Structural maintenance of chromosomes flexible hinge domain-containing protein 1	SMCHD1	11	7	0	0	11	7	0	0	12.9	48.675	0.89531	1.1559	NaN	NaN	1.1051	0.93919	NaN	NaN
A6NIT2	Phosphorylase b kinase regulatory subunit alpha, skeletal muscle isoform	PHKA1	2	3	0	0	2	3	0	0	3.9	8.1671	1.0009	1.1223	NaN	NaN	1.1772	1.0948	NaN	NaN
A6NJX6	Coiled-coil-helix-coiled-coil-helix domain-containing protein 1	CHCHD1	1	1	0	0	1	1	0	0	11.3	7.4855	NaN	NaN	NaN	NaN	NaN	NaN	NaN	NaN
A6NKD9	Coiled-coil domain-containing protein 85C	CCDC85C	1	1	0	0	1	1	0	0	5.7	5.1797	NaN	0.69944	NaN	NaN	NaN	0.99624	NaN	NaN
F8WC89	SAC3 domain-containing protein 1	SAC3D1	1	2	0	0	1	2	0	0	10.1	3.4316	NaN	0.71477	NaN	NaN	NaN	1.0013	NaN	NaN
J3KNE0	RanBP2-like and GRIP domain-containing protein 3;RanBP2-like and GRIP domain-containing protein 4;RANBP2-like and GRIP domain-containing protein 5/6;RANBP2-like and GRIP domain-containing protein 8	RGPD3	16	14	0	0	1	1	0	0	12.7	6.7111	NaN	NaN	NaN	NaN	NaN	NaN	NaN	NaN
A6NLH6	Protein cornichon homolog 4	CNIH4	1	1	0	0	1	1	0	0	14.6	4.4407	NaN	1.0448	NaN	NaN	NaN	0.90944	NaN	NaN
A6NLN1		PTBP1	21	21	21	23	1	1	0	0	71	198.97	NaN	NaN	NaN	NaN	NaN	NaN	NaN	NaN
E9PJK1	Tetraspanin;CD81 antigen	CD81	3	2	0	0	3	2	0	0	35.8	194.3	1.2136	0.99744	NaN	NaN	1.1745	1.0619	NaN	NaN
A6NMQ1	DNA polymerase;DNA polymerase alpha catalytic subunit	POLA1	5	4	0	0	5	4	0	0	5	10.101	0.91881	0.9053	NaN	NaN	0.82905	0.96141	NaN	NaN
A6NMQ3	Alpha-endosulfine	ENSA	5	6	0	0	4	5	0	0	52.1	69.131	0.85011	0.82891	NaN	NaN	0.85774	0.79906	NaN	NaN
A6NMY6	Putative annexin A2-like protein	ANXA2P2	34	38	8	10	0	1	0	0	69.3	-2	NaN	NaN	NaN	NaN	NaN	NaN	NaN	NaN	+
A6NNK5	Tumor suppressor p53-binding protein 1	TP53BP1	10	10	0	0	10	10	0	0	12.5	52.46	0.91963	0.89612	NaN	NaN	1.0006	0.77225	NaN	NaN
A6PVN5	Serine/threonine-protein phosphatase 2A activator	PPP2R4	9	7	0	0	9	7	0	0	44.1	25.825	1.0794	1.452	NaN	NaN	0.94834	0.98629	NaN	NaN
A6PW57	Phosphatidylinositol 4-phosphate 5-kinase type-1 alpha;Phosphatidylinositol 4-phosphate 5-kinase type-1 beta;Phosphatidylinositol 4-phosphate 5-kinase type-1 gamma	PIP5K1A	1	2	0	0	1	2	0	0	8.5	4.0135	1.1923	0.97015	NaN	NaN	1.2621	1.6831	NaN	NaN
A6ZKI3	Protein FAM127A;Protein FAM127B	FAM127A	2	1	0	0	2	1	0	0	18.6	4.9935	1.4123	1.028	NaN	NaN	1.0116	1.4467	NaN	NaN
CON__Q3SX28		TPM2b	15	19	1	1	0	0	0	0	52.1	119.1	NaN	NaN	NaN	NaN	NaN	NaN	NaN	NaN			+
A8CG34	Nuclear envelope pore membrane protein POM 121C;Putative nuclear envelope pore membrane protein POM 121B;Nuclear envelope pore membrane protein POM 121	POM121C	2	1	0	0	2	1	0	0	3.6	3.6419	0.78329	1.0438	NaN	NaN	1.0191	0.7838	NaN	NaN
A8CTZ0	Intersectin-1	ITSN1	1	1	0	0	1	1	0	0	2.3	6.425	NaN	NaN	NaN	NaN	NaN	NaN	NaN	NaN			+
A8K7Q2		HSPA8	41	41	10	13	1	0	0	0	80	-2	NaN	NaN	NaN	NaN	NaN	NaN	NaN	NaN	+
A8K878	Mesencephalic astrocyte-derived neurotrophic factor	MANF	9	8	4	4	9	8	4	4	47	47.523	0.97246	0.92943	0.013146	0.031093	0.87705	0.92452	0.0085392	0.018135
Q5TIG5	Afadin	MLLT4	0	1	1	1	0	1	1	1	1.3	3.053	NaN	NaN	NaN	NaN	NaN	NaN	NaN	NaN
R9WNI0	Fragile X mental retardation protein 1	FMR1	8	7	1	1	5	4	0	0	17.3	10.448	0.93035	0.93047	NaN	NaN	1.0741	0.67154	NaN	NaN
A8MT37	Glycogen synthase kinase-3 alpha	GSK3A	4	3	0	0	3	2	0	0	21.2	9.6307	1.1401	1.144	NaN	NaN	1.1829	1.1929	NaN	NaN
H3BQG3	Pyruvate dehydrogenase phosphatase regulatory subunit, mitochondrial	PDPR	1	1	0	0	1	1	0	0	2.6	2.8432	NaN	NaN	NaN	NaN	NaN	NaN	NaN	NaN
A8MUM1	Protein TSSC1	TSSC1	2	3	0	0	2	3	0	0	8.9	7.2331	0.73402	0.91108	NaN	NaN	1.024	0.57416	NaN	NaN
A8MX49		PPM1F	2	2	1	0	0	0	1	0	14.7	5.6859	0.82698	1.3546	NaN	NaN	0.41	1.1738	NaN	NaN
A8MZH8	Pituitary tumor-transforming gene 1 protein-interacting protein	PTTG1IP	1	2	1	0	1	2	1	0	33.6	7.3569	1.0547	0.87401	NaN	NaN	1.1146	1.2458	NaN	NaN
A9Z1X7	Serine/arginine repetitive matrix protein 1	SRRM1	8	6	0	0	8	6	0	0	11	118.14	0.62069	1.1952	NaN	NaN	1.1793	0.73241	NaN	NaN
B0QYK0	RNA-binding protein EWS	EWSR1	8	7	8	8	8	7	8	8	23.3	189.34	1.1293	0.84501	1.3259	0.95631	0.90584	1.1706	0.82246	1.2905
H3BQQ9	SUMO-conjugating enzyme UBC9	UBE2I	7	6	0	0	7	6	0	0	69.3	44.886	0.9169	1.0303	NaN	NaN	1.037	0.9665	NaN	NaN
B1AH87	Translocator protein	TSPO	3	1	0	0	3	1	0	0	53.3	30.657	1.0867	0.92255	NaN	NaN	0.98122	0.89889	NaN	NaN
B1AJQ6	Syntaxin-12	STX12	1	0	0	0	1	0	0	0	7	4.6608	1.0355	NaN	NaN	NaN	1.003	NaN	NaN	NaN
B1AJY7	26S proteasome non-ATPase regulatory subunit 10	PSMD10	5	5	0	1	5	5	0	1	35.8	74.656	0.87106	1.0576	NaN	NaN	1.0134	0.85502	NaN	NaN
B1AKD8	Rootletin	CROCC	1	1	0	0	1	1	0	0	0.6	3.4584	1.1297	0.96244	NaN	NaN	1.129	1.1506	NaN	NaN
B1ALA9	Ribose-phosphate pyrophosphokinase 1	PRPS1	16	17	0	1	5	7	0	0	57.9	206.98	1.1131	1.0753	NaN	1.3319	1.0701	1.0549	NaN	3.1225
B1ALM5	Transmembrane protein 9	TMEM9	1	3	2	3	1	3	2	3	30.6	5.796	NaN	0.9971	1.0554	0.64219	NaN	1.1218	1.0585	1.2118
B1AMB1	Target of rapamycin complex 2 subunit MAPKAP1	MAPKAP1	0	1	0	0	0	1	0	0	15.1	2.2678	NaN	0.88495	NaN	NaN	NaN	1.0051	NaN	NaN
B1AMS2	Septin-6	2006-09-01	10	8	0	0	5	4	0	0	32.9	89.237	0.93481	1.107	NaN	NaN	1.0468	0.97248	NaN	NaN
B1AMU7	Exosome complex component CSL4	EXOSC1	3	3	0	0	3	3	0	0	24.8	25.584	0.88501	1.0363	NaN	NaN	0.94501	0.83231	NaN	NaN
H0YDI1	Lymphocyte function-associated antigen 3	CD58	1	0	2	2	1	0	2	2	9.2	3.9818	NaN	NaN	0.80323	0.91334	NaN	NaN	0.94073	0.81593
B1ANS9	WD repeat-containing protein 64	WDR64	1	1	1	0	1	1	1	0	3.8	2.278	NaN	NaN	NaN	NaN	NaN	NaN	NaN	NaN
B1AP13	Complement decay-accelerating factor	CD55	15	12	8	7	15	12	8	7	39	258.49	1.0006	0.90728	0.89339	0.72464	1.2479	1.1009	1.0186	1.0714
B1APM4	Sterol O-acyltransferase 1	SOAT1	3	4	0	0	3	4	0	0	20.4	77.81	0.98454	0.85557	NaN	NaN	0.90266	0.96155	NaN	NaN
B1AUU8	Epidermal growth factor receptor substrate 15	EPS15	3	1	0	0	3	1	0	0	6	7.2541	0.99544	NaN	NaN	NaN	0.85731	NaN	NaN	NaN
E5RGS7	PDZ and LIM domain protein 2	PDLIM2	2	3	0	0	2	3	0	0	46.2	23.985	1.056	0.84128	NaN	NaN	0.78665	1.1243	NaN	NaN
F5H5N2	Iron-sulfur cluster assembly enzyme ISCU, mitochondrial	ISCU	2	2	0	0	1	1	0	0	16.9	5.9316	0.83437	1.0843	NaN	NaN	1.0819	0.92964	NaN	NaN
B3KSI3	Branched-chain-amino-acid aminotransferase;Branched-chain-amino-acid aminotransferase, mitochondrial	BCAT2	6	6	0	0	6	6	0	0	29.5	18.081	1.05	1.0339	NaN	NaN	0.7345	1.1967	NaN	NaN
B3KT28	FAS-associated factor 1	FAF1	2	2	0	0	2	2	0	0	3.9	3.8373	0.88993	NaN	NaN	NaN	0.87606	NaN	NaN	NaN
H0YMT8	Mortality factor 4-like protein 1	MORF4L1	2	2	0	0	2	2	0	0	39	5.3749	0.9357	1.241	NaN	NaN	1.0012	1.1058	NaN	NaN
B4DDF4	Calponin;Calponin-2	CNN2	15	15	0	0	14	15	0	0	65.4	323.31	0.83218	0.88975	NaN	NaN	0.89869	0.87295	NaN	NaN
B4DHR0	Rab GTPase-binding effector protein 2	RABEP2	1	1	0	0	1	1	0	0	4.8	4.2512	NaN	NaN	NaN	NaN	NaN	NaN	NaN	NaN
H3BRY6	von Willebrand factor A domain-containing protein 9	VWA9	1	1	0	0	1	1	0	0	4.5	2.4885	NaN	NaN	NaN	NaN	NaN	NaN	NaN	NaN
B4DJV2	Citrate synthase;Citrate synthase, mitochondrial	CS	22	20	0	2	21	19	0	2	58.3	194.31	1.0884	1.1088	NaN	1.8401	1.0539	1.1001	NaN	1.2883
B4DKY1	Cysteine--tRNA ligase, cytoplasmic	CARS	6	5	1	0	6	5	1	0	17.1	14.301	0.72188	1.0385	NaN	NaN	1.2093	0.6863	NaN	NaN
B4DLN1			12	11	0	0	0	0	0	0	34.4	124.38	1.0424	0.95152	NaN	NaN	0.98644	1.1337	NaN	NaN
B4DLR8	NAD(P)H dehydrogenase [quinone] 1	NQO1	12	11	1	2	12	11	1	2	49.5	280.21	1.0152	0.99191	NaN	0.61507	0.98785	1.0187	NaN	0.67347
B4DR61	Protein transport protein Sec61 subunit alpha isoform 1	SEC61A1	7	6	0	0	7	6	0	0	16.8	19.582	0.93479	0.96003	NaN	NaN	0.87537	0.81575	NaN	NaN
B4DR80	Serine/threonine-protein kinase 24;Serine/threonine-protein kinase 24 36 kDa subunit;Serine/threonine-protein kinase 24 12 kDa subunit	STK24	10	9	0	0	6	5	0	0	31.3	54.819	1.2912	1.0128	NaN	NaN	1.1418	1.9372	NaN	NaN
B4DYU2	Conserved oligomeric Golgi complex subunit 8	COG8	1	1	0	0	1	1	0	0	2	2.4562	NaN	NaN	NaN	NaN	NaN	NaN	NaN	NaN
B4DZG7	ADP-ribosylation factor-like protein 1	ARL1	2	1	0	0	1	1	0	0	24.4	106.34	0.91953	1.1874	NaN	NaN	0.93093	1.1361	NaN	NaN
B4E0T2	Peroxisomal targeting signal 1 receptor	PEX5	2	2	0	0	2	2	0	0	4.5	8.1931	NaN	NaN	NaN	NaN	NaN	NaN	NaN	NaN
Q8NBY1	Serine/threonine-protein kinase 26	STK26	10	11	0	0	6	7	0	0	42.3	88.16	0.96173	1.0717	NaN	NaN	1.0201	0.95821	NaN	NaN
B4E1G1	Derlin-1	DERL1	2	3	0	0	2	3	0	0	17.9	7.7105	0.89641	1.0425	NaN	NaN	1.0275	0.87065	NaN	NaN
H0Y8X9	Calcium-transporting ATPase;Calcium-transporting ATPase type 2C member 1	ATP2C1	0	1	0	1	0	1	0	1	15.8	2.0989	NaN	NaN	NaN	NaN	NaN	NaN	NaN	NaN
B4E3T4	RNA-binding protein with multiple splicing	RBPMS	0	2	0	0	0	2	0	0	13.8	5.6717	NaN	1.3045	NaN	NaN	NaN	1.4468	NaN	NaN
B5MBX5	Protein LBH	LBH	2	3	0	0	2	3	0	0	39.8	7.6989	1.1129	0.98485	NaN	NaN	0.95651	0.89681	NaN	NaN
B5MBZ0	Echinoderm microtubule-associated protein-like 4	EML4	17	19	1	1	17	19	1	1	29.7	80.221	1.1143	0.99942	NaN	NaN	0.9541	0.94728	NaN	NaN
H7C118	Protein phosphatase 1 regulatory subunit 7	PPP1R7	2	1	0	0	2	1	0	0	23.6	9.3558	0.83569	NaN	NaN	NaN	0.80041	NaN	NaN	NaN
C9JKY3	Epithelial cell adhesion molecule	EPCAM	3	3	0	1	3	3	0	1	26.6	45.981	1.3153	0.85079	NaN	NaN	1.2144	1.3535	NaN	NaN
B5MCB5	Cellular retinoic acid-binding protein 1	CRABP1	1	1	0	0	1	0	0	0	17.7	2.1914	NaN	NaN	NaN	NaN	NaN	NaN	NaN	NaN
B5MCD7	Synaptogyrin-1	SYNGR1	1	2	0	0	1	2	0	0	13	2.8252	1.2621	0.94224	NaN	NaN	0.98311	1.0072	NaN	NaN
B5MCF9	Pescadillo homolog	PES1	10	9	0	4	10	9	0	4	30.5	33.839	1.0861	1.0654	NaN	1.1817	1.0289	1.1615	NaN	1.1717
B5MCT7	Protein phosphatase 1F	PPM1F	3	2	0	0	1	0	0	0	22.7	2.4304	NaN	NaN	NaN	NaN	NaN	NaN	NaN	NaN
B5MCU0		R3HDM2	1	0	0	0	1	0	0	0	1.8	-2	NaN	NaN	NaN	NaN	NaN	NaN	NaN	NaN	+
B5MD00	Mitochondrial import receptor subunit TOM7 homolog	TOMM7	1	1	0	0	1	1	0	0	33.3	3.5388	NaN	NaN	NaN	NaN	NaN	NaN	NaN	NaN
B5MDF5	GTP-binding nuclear protein Ran	RAN	15	15	2	2	15	15	2	2	50.6	323.31	0.95038	1.0558	2.1093	1.4173	1.0319	0.98338	1.0166	1.8678
B5MDQ0	DNA excision repair protein ERCC-6-like	ERCC6L	3	3	0	0	3	3	0	0	5.1	8.6994	0.73947	0.91652	NaN	NaN	1.0909	0.79633	NaN	NaN
E7EW69	Septin-10	2010-09-01	6	8	0	0	4	6	0	0	32	23.928	0.90231	0.88655	NaN	NaN	1.1705	0.94276	NaN	NaN
B7WP74	Pre-mRNA-splicing factor CWC22 homolog	CWC22	1	1	0	2	1	1	0	2	4.2	3.6817	NaN	NaN	NaN	NaN	NaN	NaN	NaN	1.0027
J3QRS8	ADP-ribosylation factor-binding protein GGA3	GGA3	1	1	0	0	1	1	0	0	13.2	2.3237	0.75759	NaN	NaN	NaN	1.0182	NaN	NaN	NaN
V9GY21	Conserved oligomeric Golgi complex subunit 2	COG2	1	1	0	0	1	1	0	0	10.5	2.7408	NaN	NaN	NaN	NaN	NaN	NaN	NaN	NaN
B7Z589	Transporter;Sodium- and chloride-dependent glycine transporter 1	SLC6A9	2	1	0	0	2	1	0	0	3.6	3.6159	NaN	NaN	NaN	NaN	NaN	NaN	NaN	NaN
B7Z5N5	Mothers against decapentaplegic homolog;Mothers against decapentaplegic homolog 2;Mothers against decapentaplegic homolog 3	SMAD2	7	7	0	0	7	7	0	0	20.9	15.824	1.0802	0.84417	NaN	NaN	0.94128	1.0203	NaN	NaN
B7Z6D5	Probable ATP-dependent RNA helicase DDX27	DDX27	13	12	3	5	13	12	3	5	23.4	58.714	1.0807	1.214	0.94814	1.0295	0.99931	1.0205	0.81572	0.91721
B7Z7F3	Ran-binding protein 3	RANBP3	6	4	0	0	6	4	0	0	21.7	22.775	1.0323	1.0633	NaN	NaN	1.4097	0.93262	NaN	NaN
F8WF16	Periphilin-1	PPHLN1	1	2	0	0	1	2	0	0	5.3	2.2915	NaN	NaN	NaN	NaN	NaN	NaN	NaN	NaN
B7Z934	Transcription factor COE2	EBF2	1	0	1	1	1	0	1	1	2.6	2.086	NaN	NaN	1.3029	0.83521	NaN	NaN	0.89864	1.0657
B7Z9I1	Medium-chain specific acyl-CoA dehydrogenase, mitochondrial	ACADM	20	16	1	2	20	16	1	2	53.8	186.59	0.93745	0.99435	NaN	1.5433	0.97748	0.94165	NaN	1.2459
B7ZC39	Endophilin-B2	SH3GLB2	5	4	0	0	5	4	0	0	19.5	22.873	1.3255	1.1326	NaN	NaN	0.99243	1.0539	NaN	NaN
B7ZKQ9	Scavenger receptor class B member 1	SCARB1	6	6	1	3	6	6	1	3	18.9	24.673	1.2927	1.0103	1.1368	0.76742	0.90727	1.1138	0.74032	1.0425
B8ZZD4	Tax1-binding protein 1	TAX1BP1	3	5	24	26	0	0	1	0	43.2	182.49	2.7686	1.3491	3.1884	0.76821	0.98032	2.8586	0.70377	3.5993
B8ZZF3	Mediator of RNA polymerase II transcription subunit 26	MED26	0	0	1	1	0	0	1	1	3.5	-2	NaN	NaN	NaN	NaN	NaN	NaN	NaN	NaN	+
C9J128	Inositol polyphosphate 1-phosphatase	INPP1	1	1	0	0	1	1	0	0	17.6	2.609	NaN	NaN	NaN	NaN	NaN	NaN	NaN	NaN
B8ZZG1	MAGUK p55 subfamily member 6	MPP6	1	3	0	0	1	3	0	0	6.5	4.8857	NaN	0.65277	NaN	NaN	NaN	1.1054	NaN	NaN
B8ZZN6	Small ubiquitin-related modifier 1;Small ubiquitin-related modifier	SUMO1	2	3	0	0	2	3	0	0	24	5.6207	1.6548	1.0943	NaN	NaN	1.1509	1.0907	NaN	NaN
B8ZZQ6	Prothymosin alpha;Prothymosin alpha, N-terminally processed;Thymosin alpha-1	PTMA	7	7	0	0	7	7	0	0	39.3	323.31	0.96493	1.033	NaN	NaN	1.0123	1.0304	NaN	NaN
B8ZZT4	Vesicle-associated membrane protein 8	VAMP8	3	3	0	0	3	3	0	0	33.3	7.3906	0.80433	0.87739	NaN	NaN	0.86165	1.0842	NaN	NaN
E9PEK8	Cyclic AMP-dependent transcription factor ATF-2	ATF2	1	1	1	0	1	1	1	0	16	4.5397	NaN	0.68423	NaN	NaN	NaN	0.87098	NaN	NaN
B8ZZV5	39S ribosomal protein L30, mitochondrial	MRPL30	1	1	0	1	1	1	0	1	22.8	4.7867	NaN	NaN	NaN	NaN	NaN	NaN	NaN	NaN
C9J2I0	Arf-GAP domain and FG repeat-containing protein 1	AGFG1	2	2	0	0	2	2	0	0	13.9	28.035	1.0063	1.0024	NaN	NaN	0.99772	0.99409	NaN	NaN
B8ZZZ7	SPATS2-like protein	SPATS2L	0	2	0	0	0	2	0	0	5.8	3.6238	NaN	1.2171	NaN	NaN	NaN	0.84113	NaN	NaN
B9A008	U3 small nucleolar ribonucleoprotein protein IMP4	IMP4	1	1	0	0	1	1	0	0	10.5	2.4882	NaN	NaN	NaN	NaN	NaN	NaN	NaN	NaN
F8WF17	Galectin;Galectin-related protein	LGALSL	2	2	0	0	2	2	0	0	28.6	4.0396	0.98011	0.9554	NaN	NaN	0.95892	0.99086	NaN	NaN
B9A067	MICOS complex subunit MIC60	IMMT	33	32	0	0	33	32	0	0	53.6	271.65	1.0543	1.0964	NaN	NaN	1.0004	1.0436	NaN	NaN
J3QWB6	SWI/SNF-related matrix-associated actin-dependent regulator of chromatin subfamily D member 2	SMARCD2	1	1	1	1	1	1	1	1	19.9	2.4971	NaN	NaN	NaN	NaN	NaN	NaN	NaN	NaN
CON__Q92764	Keratin, type I cuticular Ha5	KRT35	3	2	1	1	1	0	0	0	7.3	-2	NaN	NaN	NaN	NaN	NaN	NaN	NaN	NaN	+		+
C9IY40	39S ribosomal protein L2, mitochondrial	MRPL2	1	2	1	0	1	2	1	0	26.2	36.339	NaN	1.3658	NaN	NaN	NaN	1.3607	NaN	NaN
C9JGJ9	B-cell receptor-associated protein 29	BCAP29	1	1	0	0	1	1	0	0	11.3	3.5386	NaN	NaN	NaN	NaN	NaN	NaN	NaN	NaN
C9IYN3	Heterogeneous nuclear ribonucleoprotein L-like	HNRNPLL	6	6	3	4	2	4	1	2	25.7	15.488	1.1305	0.99505	1.1781	1.1535	1.1626	0.93877	1.0454	1.0296
C9IZ32	TBC1 domain family member 23	TBC1D23	1	1	0	0	1	1	0	0	9.9	3.5744	1.033	0.93852	NaN	NaN	0.9086	1.0252	NaN	NaN
F2Z340	2-amino-3-ketobutyrate coenzyme A ligase, mitochondrial	GCAT	1	1	0	0	1	1	0	0	12.1	2.6878	NaN	NaN	NaN	NaN	NaN	NaN	NaN	NaN
H7C1T3	Choline-phosphate cytidylyltransferase B;Choline-phosphate cytidylyltransferase A	PCYT1A	1	2	0	0	1	2	0	0	13.9	3.7782	1.188	1.035	NaN	NaN	1.0998	1.0423	NaN	NaN
C9J0I9	Nuclear-interacting partner of ALK	ZC3HC1	5	3	0	0	5	3	0	0	20.5	18.661	0.82244	0.9435	NaN	NaN	0.88814	0.87153	NaN	NaN
C9J0K6	Sorcin	SRI	11	13	1	1	11	13	1	1	86.5	198.56	0.93694	1.0752	NaN	NaN	1.1103	0.95874	NaN	NaN
C9J0Q4	E3 ubiquitin-protein ligase RAD18	RAD18	1	1	0	0	1	1	0	0	17.6	2.6991	0.99548	1.0575	NaN	NaN	1.0511	1.0077	NaN	NaN
C9JE98	Nuclear receptor corepressor 2	NCOR2	1	4	0	0	1	4	0	0	3.7	4.7118	NaN	0.69958	NaN	NaN	NaN	0.72705	NaN	NaN
C9J1C6	E3 ubiquitin-protein ligase RNF181	RNF181	2	1	0	0	2	1	0	0	19.4	2.256	1.023	NaN	NaN	NaN	0.83414	NaN	NaN	NaN
C9J235	RUN and FYVE domain-containing protein 4	RUFY4	1	0	0	0	1	0	0	0	2.3	-2	NaN	NaN	NaN	NaN	NaN	NaN	NaN	NaN	+
C9J2C0	Tubulin alpha-8 chain	TUBA8	21	19	11	12	1	0	0	0	38.1	-2	NaN	NaN	NaN	NaN	NaN	NaN	NaN	NaN	+
C9J2G0	BRCA1-A complex subunit BRE	BRE	3	3	0	0	3	3	0	0	33.3	7.1103	0.94339	1.0949	NaN	NaN	0.90682	0.94688	NaN	NaN
C9J2Y9	DNA-directed RNA polymerase;DNA-directed RNA polymerase II subunit RPB2	POLR2B	18	15	2	1	18	15	2	1	25.7	64.253	0.83878	0.98164	1.3864	1.0138	0.99541	0.98847	0.94716	1.2936
C9J316	Protein SGT1	ECD	2	1	0	0	2	1	0	0	15.6	3.7933	NaN	NaN	NaN	NaN	NaN	NaN	NaN	NaN
C9J3F6	TBC1 domain family member 5	TBC1D5	2	0	0	0	2	0	0	0	5.1	3.2821	1.0555	NaN	NaN	NaN	1.0957	NaN	NaN	NaN
C9J494	Probable E3 ubiquitin-protein ligase makorin-2	MKRN2	3	2	0	0	3	2	0	0	12.6	6.5786	1.4651	1.1102	NaN	NaN	1.5048	1.5006	NaN	NaN
C9J4G5	EGF domain-specific O-linked N-acetylglucosamine transferase	EOGT	0	1	0	0	0	1	0	0	11.4	2.1326	NaN	NaN	NaN	NaN	NaN	NaN	NaN	NaN
H7C5M9	Programmed cell death protein 10	PDCD10	5	3	0	0	5	3	0	0	48.4	16.865	1.016	0.93937	NaN	NaN	1.096	1.1449	NaN	NaN
C9J5G4	Follistatin-related protein 1	FSTL1	1	1	0	0	1	1	0	0	7.9	2.3225	NaN	NaN	NaN	NaN	NaN	NaN	NaN	NaN
C9J5M1		LOXL3	1	1	0	0	1	1	0	0	3	2.6987	NaN	NaN	NaN	NaN	NaN	NaN	NaN	NaN
C9J5N1	Alanyl-tRNA editing protein Aarsd1	PTGES3L-AARSD1	3	5	0	0	3	5	0	0	10.9	15.129	0.92171	0.73125	NaN	NaN	0.82266	0.87703	NaN	NaN
C9J5X1	Tyrosine-protein kinase receptor;Insulin-like growth factor 1 receptor;Insulin-like growth factor 1 receptor alpha chain;Insulin-like growth factor 1 receptor beta chain	IGF1R	2	1	0	0	2	1	0	0	1.6	4.6959	1.0303	0.91003	NaN	NaN	1.0421	0.92108	NaN	NaN
C9J6W1		RGPD5	2	1	0	0	1	0	0	0	15.1	-2	NaN	NaN	NaN	NaN	NaN	NaN	NaN	NaN	+
F8WCJ1	Eukaryotic translation initiation factor 5A;Eukaryotic translation initiation factor 5A-2	EIF5A2	11	10	3	5	1	0	0	0	68.6	3.9577	NaN	NaN	NaN	NaN	NaN	NaN	NaN	NaN
C9J880	Glycosyltransferase 8 domain-containing protein 1	GLT8D1	1	0	0	0	1	0	0	0	9.2	2.2574	NaN	NaN	NaN	NaN	NaN	NaN	NaN	NaN
C9J8D0	HMG box transcription factor BBX	BBX	0	1	0	0	0	1	0	0	2.7	2.2875	NaN	NaN	NaN	NaN	NaN	NaN	NaN	NaN
C9J8Q5	Succinate-semialdehyde dehydrogenase, mitochondrial	ALDH5A1	3	4	0	0	3	4	0	0	12.2	14.104	1.1703	1.0828	NaN	NaN	0.94507	1.0738	NaN	NaN
C9J8R4	DCN1-like protein;DCN1-like protein 1	DCUN1D1	3	3	0	0	3	3	0	0	29.7	26.928	1.0579	1.0806	NaN	NaN	1.1333	1.0343	NaN	NaN
C9J8T0	Selenocysteine-specific elongation factor	EEFSEC	0	3	0	0	0	3	0	0	10.6	14.09	NaN	1.0781	NaN	NaN	NaN	0.71123	NaN	NaN
C9J931	GTP-binding protein Rheb	RHEB	8	7	0	0	8	7	0	0	68.4	65.132	1.0153	0.95145	NaN	NaN	1.0207	0.96369	NaN	NaN
C9J9J4	55 kDa erythrocyte membrane protein	MPP1	1	1	0	0	1	1	0	0	13.2	2.5276	NaN	NaN	NaN	NaN	NaN	NaN	NaN	NaN
C9J9W2		LASP1	13	12	1	1	1	0	0	0	59	-2	NaN	NaN	NaN	NaN	NaN	NaN	NaN	NaN	+
C9JA08	60S ribosomal export protein NMD3	NMD3	4	4	0	0	4	4	0	0	18.9	27.462	1.0672	0.98548	NaN	NaN	1.0239	1.2977	NaN	NaN
C9JA28	Translocon-associated protein subunit gamma	SSR3	1	1	0	0	1	1	0	0	8	10.349	0.94836	0.97779	NaN	NaN	0.93132	1.0058	NaN	NaN
C9JAB2	Serine/arginine-rich splicing factor 7	SRSF7	11	15	10	9	10	14	9	8	45.5	170.56	0.98754	1.1654	1.0044	1.0876	1.0872	0.97459	1.0694	0.98695
C9JAJ9		RBBP7	2	2	0	0	1	1	0	0	45.9	2.9395	0.94685	0.99671	NaN	NaN	0.90102	0.9235	NaN	NaN
C9JAW5	HIG1 domain family member 1A, mitochondrial	HIGD1A	1	1	0	0	1	1	0	0	21.7	62.211	0.97782	1.1421	NaN	NaN	0.99616	1.08	NaN	NaN
C9JBI3	Phosphoserine phosphatase	PSPH	5	3	0	0	5	3	0	0	29.9	14.104	1.1169	0.78196	NaN	NaN	0.89709	0.66913	NaN	NaN
E9PQX9	Dr1-associated corepressor	DRAP1	4	3	0	0	4	3	0	0	25.9	13.494	1.019	0.85027	NaN	NaN	1.1298	0.84957	NaN	NaN
C9JCN8	Fos-related antigen 2	FOSL2	1	1	0	0	1	1	0	0	5.9	2.2032	NaN	NaN	NaN	NaN	NaN	NaN	NaN	NaN
C9JG97	Angio-associated migratory cell protein	AAMP	4	3	0	0	4	3	0	0	13	8.8635	0.86616	1.6059	NaN	NaN	0.90922	0.74523	NaN	NaN
C9JEX3	Myotubularin-related protein 2	MTMR2	3	1	0	0	3	1	0	0	7.4	4.0626	0.89565	NaN	NaN	NaN	0.86232	NaN	NaN	NaN
C9JFE4	COP9 signalosome complex subunit 1	GPS1	10	10	0	0	4	4	0	0	31	44.345	0.85386	0.97629	NaN	NaN	0.98338	0.98042	NaN	NaN
C9JFR7	Cytochrome c	CYCS	11	13	0	1	9	10	0	1	80.2	146.14	1.0254	0.98396	NaN	NaN	0.96152	1.0083	NaN	NaN
C9JG41	Integral membrane protein 2C;CT-BRI3	ITM2C	1	1	0	0	1	1	0	0	11.1	10.518	NaN	NaN	NaN	NaN	NaN	NaN	NaN	NaN
C9JG87	39S ribosomal protein L39, mitochondrial	MRPL39	4	3	0	0	4	3	0	0	18.5	8.0124	0.93217	0.95128	NaN	NaN	0.68959	0.94619	NaN	NaN
C9JGI3	Thymidine phosphorylase	TYMP	5	5	0	0	5	5	0	0	22.9	14.366	0.72266	0.63694	NaN	NaN	0.61735	0.68423	NaN	NaN
H0YGZ7	Scavenger receptor cysteine-rich type 1 protein M130;Soluble CD163	CD163	1	0	0	0	1	0	0	0	11.3	2.0482	NaN	NaN	NaN	NaN	NaN	NaN	NaN	NaN
C9JIF9	Acylamino-acid-releasing enzyme	APEH	7	8	0	0	7	8	0	0	19.5	53.461	0.70537	0.73407	NaN	NaN	0.81013	0.79378	NaN	NaN
C9JJ19	28S ribosomal protein S34, mitochondrial	MRPS34	7	8	1	1	7	8	1	1	54.7	27.259	0.90525	1.0134	NaN	NaN	1.0877	0.91938	NaN	NaN
C9JK83	STAM-binding protein	STAMBP	1	1	0	0	1	1	0	0	4.7	2.1531	1.5622	NaN	NaN	NaN	1.7413	NaN	NaN	NaN
C9JKF1	Sterile alpha motif domain-containing protein 9	SAMD9	3	2	0	0	3	2	0	0	4.2	6.1437	1.0686	1.0752	NaN	NaN	0.83604	0.96439	NaN	NaN
C9JKQ2	NADH dehydrogenase [ubiquinone] 1 beta subcomplex subunit 3	NDUFB3	2	2	0	0	2	2	0	0	27.7	3.5112	1.1875	1.077	NaN	NaN	0.92874	1.0527	NaN	NaN
C9JLF4	Exonuclease 3-5 domain-containing protein 2	EXD2	1	0	0	0	1	0	0	0	11.4	2.843	NaN	NaN	NaN	NaN	NaN	NaN	NaN	NaN
C9JLU1	DNA-directed RNA polymerases I, II, and III subunit RPABC3	POLR2H	4	4	1	1	4	4	1	1	29.7	26.835	0.95403	1.1031	NaN	NaN	1.0703	0.978	NaN	NaN
C9JME2	FERM, RhoGEF and pleckstrin domain-containing protein 1	FARP1	4	3	0	0	4	3	0	0	5.6	13.932	0.91874	1.1249	NaN	NaN	0.89007	0.92551	NaN	NaN
C9JNG9	Collagen alpha-3(VI) chain	COL6A3	0	0	2	0	0	0	2	0	5.8	16.1	NaN	NaN	NaN	NaN	NaN	NaN	NaN	NaN
C9JXB8	60S ribosomal protein L24	RPL24	10	9	2	2	10	9	2	2	52.9	74.4	1.0673	1.0152	1.305	1.1938	1.0406	0.98908	0.94198	1.0904
C9JP16	Cartilage-associated protein	CRTAP	9	9	0	1	9	9	0	1	28.5	14.442	0.96783	1.0107	NaN	1.4684	0.93146	1.037	NaN	1.453
C9JQV0	Uncharacterized protein C7orf50	C7orf50	3	4	0	0	3	4	0	0	29.7	20.63	0.69069	0.97471	NaN	NaN	0.98728	0.7341	NaN	NaN
C9JR56	DNA-binding protein SATB;DNA-binding protein SATB2	SATB2	0	0	1	0	0	0	1	0	1.2	3.6581	NaN	NaN	NaN	NaN	NaN	NaN	NaN	NaN
C9JRD2	DnaJ homolog subfamily B member 2	DNAJB2	2	3	0	0	2	3	0	0	15.4	5.0698	0.96264	0.98786	NaN	NaN	1.5498	0.82955	NaN	NaN
C9JRJ5	LIM domain-containing protein 1	LIMD1	2	1	0	0	2	1	0	0	4.7	12.435	1.1456	NaN	NaN	NaN	1.2614	NaN	NaN	NaN
C9JRZ6	MICOS complex subunit MIC19	CHCHD3	9	9	0	0	9	9	0	0	38.4	53.746	1.0561	1.0513	NaN	NaN	1.0024	0.99608	NaN	NaN
C9JTX5		ACTB	9	10	7	7	0	1	0	0	100	-2	NaN	NaN	NaN	NaN	NaN	NaN	NaN	NaN	+
C9JVN9	L-2-hydroxyglutarate dehydrogenase, mitochondrial	L2HGDH	1	2	0	0	1	2	0	0	4.3	2.6091	NaN	1.1834	NaN	NaN	NaN	0.9194	NaN	NaN
C9JWV4	Non-homologous end-joining factor 1	NHEJ1	1	0	0	0	1	0	0	0	9.2	2.0762	NaN	NaN	NaN	NaN	NaN	NaN	NaN	NaN
C9JYM0	Ribonuclease P protein subunit p20	POP7	3	2	0	0	3	2	0	0	32.1	8.5868	0.74317	0.78599	NaN	NaN	0.74103	1.0515	NaN	NaN
C9JZR2	Catenin delta-1	CTNND1	22	18	0	0	22	18	0	0	37.3	300.47	0.96798	1.0793	NaN	NaN	1.0029	0.99269	NaN	NaN
CON__A2A4G1			3	2	3	3	2	1	0	0	17.8	2.1755	NaN	NaN	NaN	NaN	NaN	NaN	NaN	NaN			+
CON__ENSEMBL:ENSBTAP00000007350			3	1	0	0	3	1	0	0	3.9	8.7494	NaN	0.35714	NaN	NaN	NaN	0.4639	NaN	NaN			+
CON__Q3MHN5			0	0	0	1	0	0	0	1	5.5	3.1259	NaN	NaN	NaN	NaN	NaN	NaN	NaN	NaN			+
CON__ENSEMBL:ENSBTAP00000024146			15	18	2	0	14	17	2	0	22.1	189.72	0.15843	0.24747	NaN	NaN	0.15958	0.15848	NaN	NaN			+
CON__ENSEMBL:ENSBTAP00000032840			13	13	0	1	12	13	0	1	31.3	71.246	0.18747	0.25667	NaN	NaN	0.30903	0.24544	NaN	NaN			+
CON__H			29	29	10	11	0	1	0	0	45.4	-2	NaN	NaN	NaN	NaN	NaN	NaN	NaN	NaN	+		+
CON__O76015	Keratin, type I cuticular Ha7;Keratin, type I cuticular Ha8	KRT37	2	2	1	1	1	1	0	0	3.5	3.0702	1.3505	0.98665	NaN	NaN	1.0077	1.4189	NaN	NaN			+
CON__P00761			11	11	10	10	11	11	10	10	53.2	323.31	0.087231	0.092558	0.086018	0.080759	0.037274	0.022637	0.0091088	0.0045293			+
CON__P01966			3	3	6	8	1	2	3	5	84.5	18.869	0.13768	0.11848	0.026226	0.089658	0.13942	0.073474	0.019829	0.049431			+
CON__P02070			1	1	4	4	0	0	2	2	22.8	12.826	NaN	NaN	0.01559	0.020744	NaN	NaN	0.001392	0.0069166			+
CON__P02666			0	0	1	1	0	0	1	1	9.1	3.2392	NaN	NaN	NaN	NaN	NaN	NaN	NaN	NaN			+
CON__P02769			51	44	33	38	48	40	31	35	81.7	323.31	0.087712	0.096171	0.052891	0.058114	0.088495	0.093451	0.04524	0.048869			+
CON__P02777			2	3	0	0	2	3	0	0	19.1	11.447	0.15908	0.16845	NaN	NaN	0.14557	0.1617	NaN	NaN			+
CON__P04264	Keratin, type II cytoskeletal 1	KRT1	14	3	15	7	9	1	11	3	40.8	200.37	0.94303	0.77809	0.068777	0.15369	0.85689	1.3489	0.098439	0.207			+
CON__P05784			16	17	4	5	1	1	0	0	27	3.4571	NaN	NaN	NaN	NaN	NaN	NaN	NaN	NaN			+
CON__P05787	Keratin, type II cytoskeletal 8	KRT8	66	66	16	21	27	28	4	6	90.3	323.31	1.2919	0.93679	1.8063	1.6611	0.9776	1.4204	1.0578	1.5227			+
CON__P06868			3	1	0	1	3	1	0	1	3.8	4.1624	NaN	NaN	NaN	NaN	NaN	NaN	NaN	NaN			+
CON__P12763			10	12	15	13	10	12	15	13	52.9	323.31	0.12728	0.099118	0.093443	0.084217	0.11774	0.09159	0.014052	0.054474			+
CON__P13645	Keratin, type I cytoskeletal 10	KRT10	7	1	18	12	5	0	14	8	40.1	154.25	0.17861	NaN	0.12256	0.13368	0.17747	NaN	0.062933	0.19834			+
CON__P15497			0	1	1	0	0	1	1	0	10.2	4.4225	NaN	NaN	NaN	NaN	NaN	NaN	NaN	NaN			+
CON__P34955			15	11	5	4	15	11	5	4	38.9	194.49	0.081777	0.098304	NaN	0.13994	0.085511	0.15055	NaN	NaN			+
CON__P35527	Keratin, type I cytoskeletal 9	KRT9	4	0	8	4	4	0	7	3	26.8	46.402	NaN	NaN	0.14636	NaN	NaN	NaN	0.13033	NaN			+
CON__P35908v2	Keratin, type II cytoskeletal 2 epidermal	KRT2	12	6	6	4	4	0	3	1	28.2	18.663	NaN	NaN	0.080821	NaN	NaN	NaN	NaN	NaN			+
CON__P81644			1	0	1	1	1	0	1	1	16	9.8204	NaN	NaN	NaN	NaN	NaN	NaN	NaN	NaN			+
CON__Q0IIK2			47	49	2	3	46	48	2	3	77.1	323.31	0.12319	0.14533	NaN	NaN	0.097011	0.13455	NaN	NaN			+
CON__Q2UVX4			1	2	0	1	1	2	0	1	2.4	4.6415	0.95185	1.1251	NaN	NaN	1.0689	0.99053	NaN	NaN			+
CON__Q3SX09			5	4	5	6	4	3	3	4	43.8	47.483	0.09066	0.14492	0.015148	0.09084	0.07547	0.18769	0.12656	0.062875			+
CON__Q3SZ57			3	3	0	0	3	3	0	0	8.2	9.2692	NaN	0.74637	NaN	NaN	NaN	0.76776	NaN	NaN			+
CON__Q3SZR3			3	1	1	1	3	1	1	1	22.8	7.2191	NaN	NaN	NaN	0.03347	NaN	NaN	NaN	0.1278			+
CON__Q3SZV7			1	2	0	1	1	2	0	1	9.1	5.277	NaN	0.32539	NaN	0.086721	NaN	0.18348	NaN	0.13882			+
CON__Q3TTY5			7	6	5	3	0	0	2	2	16.7	3.0865	NaN	NaN	1.1355	0.71231	NaN	NaN	0.99587	1.8695			+
CON__Q3ZBD7			6	6	1	1	1	1	0	0	15.3	3.2401	NaN	NaN	NaN	NaN	NaN	NaN	NaN	NaN			+
CON__Q3ZBS7			3	2	3	5	3	2	3	5	15.5	11.773	0.10554	0.3193	0.069677	0.22418	0.076645	0.45116	0.08367	0.11362			+
CON__Q58D62			2	3	0	2	2	3	0	2	19.6	10.544	0.78043	NaN	NaN	0.10503	NaN	NaN	NaN	NaN			+
CON__Q6KB66	Keratin, type II cytoskeletal 80	KRT80	7	5	0	0	6	4	0	0	22.3	20.015	0.93976	0.90315	NaN	NaN	1.0507	1.1041	NaN	NaN			+
CON__Q8VED5	Keratin, type II cytoskeletal 5	KRT5	13	13	3	3	1	1	0	0	14.9	8.3028	1.1614	0.9103	NaN	1.6164	0.93956	1.2712	NaN	1.4808			+
CON__Q95121			0	0	1	1	0	0	1	1	7.2	17.654	NaN	NaN	NaN	NaN	NaN	NaN	NaN	NaN			+
CON__Q9NSB2	Keratin, type II cuticular Hb4	KRT84	10	11	2	3	2	3	0	0	9.3	3.6493	NaN	NaN	NaN	NaN	NaN	NaN	NaN	NaN			+
D3DRR9	Proline and serine-rich protein 2	C10orf47	3	2	0	0	3	2	0	0	18	4.8786	1.1366	0.95947	NaN	NaN	0.97293	1.2402	NaN	NaN
F6U1T9	Calcineurin subunit B type 1	PPP3R1	2	2	0	0	2	2	0	0	23.8	6.9527	0.96086	1.0045	NaN	NaN	0.90675	1.0263	NaN	NaN
D3YTB1	60S ribosomal protein L32	RPL32	8	9	1	1	8	9	1	1	46.6	233.72	1.0576	0.98186	0.078155	0.13607	1.0561	0.9851	0.11153	NaN
D6R938	Calcium/calmodulin-dependent protein kinase type II subunit delta	CAMK2D	8	9	0	0	6	7	0	0	28.3	44.096	1.0898	1.1599	NaN	NaN	1.2302	1.1307	NaN	NaN
D6R9A1	Cell cycle checkpoint protein RAD1	RAD1	0	1	0	0	0	1	0	0	28.6	2.859	NaN	NaN	NaN	NaN	NaN	NaN	NaN	NaN
D6RED1	Interferon regulatory factor 2	IRF2	0	1	0	0	0	1	0	0	10.8	-2	NaN	NaN	NaN	NaN	NaN	NaN	NaN	NaN	+
D6RGK7	Embryonic stem cell-specific 5-hydroxymethylcytosine-binding protein	HMCES	1	1	0	0	1	1	0	0	18	3.6391	1.0616	NaN	NaN	NaN	1.0194	NaN	NaN	NaN
D6R9U1	Pituitary homeobox 1	PITX1	0	0	0	1	0	0	0	1	5.4	-2	NaN	NaN	NaN	5.4944	NaN	NaN	NaN	0.2531	+
D6R9W2	Glutathione S-transferase C-terminal domain-containing protein	GSTCD	2	1	0	0	2	1	0	0	15.9	4.2414	1.0195	NaN	NaN	NaN	1.0271	NaN	NaN	NaN
D6R9X7	DNA excision repair protein ERCC-6	ERCC6	0	1	0	0	0	1	0	0	7.8	2.0977	NaN	NaN	NaN	NaN	NaN	NaN	NaN	NaN
D6R9Z7	Cytochrome c oxidase subunit 7C, mitochondrial	COX7C	1	1	0	0	1	1	0	0	16.1	6.4691	NaN	NaN	NaN	NaN	NaN	NaN	NaN	NaN
D6RA00	Enolase-phosphatase E1	ENOPH1	4	3	0	0	4	3	0	0	35.3	30.432	1.0371	0.97602	NaN	NaN	1.1312	0.99423	NaN	NaN
D6RAN8	39S ribosomal protein L27, mitochondrial	MRPL27	2	1	0	0	2	1	0	0	44.1	3.8616	NaN	NaN	NaN	NaN	NaN	NaN	NaN	NaN
D6RAQ1	Heparanase;Heparanase 8 kDa subunit;Heparanase 50 kDa subunit	HPSE	2	1	0	0	2	1	0	0	10.7	2.932	1.014	NaN	NaN	NaN	1.28	NaN	NaN	NaN
D6RAT4		CNBP	1	2	0	0	0	1	0	0	23.9	2.6388	NaN	NaN	NaN	NaN	NaN	NaN	NaN	NaN
D6RB19	Peptidylprolyl isomerase domain and WD repeat-containing protein 1	PPWD1	2	0	0	0	2	0	0	0	29	2.3318	NaN	NaN	NaN	NaN	NaN	NaN	NaN	NaN
D6RB92	Proteasome assembly chaperone 4	PSMG4	3	4	0	0	3	4	0	0	57.4	13.428	0.69654	0.88738	NaN	NaN	0.77916	0.69244	NaN	NaN
D6RBR7	Zinc finger protein 330	ZNF330	1	2	0	0	1	2	0	0	8.7	2.1343	0.95391	0.89948	NaN	NaN	0.87876	0.94711	NaN	NaN
D6RC71	Syntaxin-18	STX18	1	1	0	0	1	1	0	0	7.7	2.9793	NaN	NaN	NaN	NaN	NaN	NaN	NaN	NaN
D6RCD0	Estradiol 17-beta-dehydrogenase 11	HSD17B11	2	2	0	0	2	2	0	0	11.7	6.1538	1.2102	1.2272	NaN	NaN	1.1467	1.2584	NaN	NaN
D6RCD6	Calcium/calmodulin-dependent protein kinase type IV	CAMK4	1	1	0	0	1	1	0	0	17	3.842	NaN	0.70942	NaN	NaN	NaN	0.82633	NaN	NaN
D6RCF4	CDGSH iron-sulfur domain-containing protein 2	CISD2	2	1	0	0	2	1	0	0	14.5	11.135	1.1193	NaN	NaN	NaN	1.1168	NaN	NaN	NaN
D6RCP9	Deoxycytidine kinase	DCK	3	2	0	0	3	2	0	0	18.1	5.4193	0.94006	1.1509	NaN	NaN	1.1073	0.98031	NaN	NaN
D6REA1	Nucleotide exchange factor SIL1	SIL1	2	0	0	0	2	0	0	0	4.5	2.5599	NaN	NaN	NaN	NaN	NaN	NaN	NaN	NaN
D6REP5	GRAM domain-containing protein 3	GRAMD3	1	2	0	0	0	1	0	0	16.3	7.0174	NaN	NaN	NaN	NaN	NaN	NaN	NaN	NaN
D6RGI3	Septin-11	2011-09-01	14	13	0	0	8	8	0	0	42.6	199.79	1.0003	1.0686	NaN	NaN	0.99829	1.0381	NaN	NaN
D6REX3	Protein transport protein Sec31A	SEC31A	26	29	1	1	26	29	1	1	30.1	311.08	0.91546	1.0119	NaN	NaN	0.95195	0.91727	NaN	NaN
D6RF69	Alpha-1,3-mannosyl-glycoprotein 2-beta-N-acetylglucosaminyltransferase	MGAT1	2	2	0	0	2	2	0	0	11.1	3.0905	1.1346	1.0549	NaN	NaN	0.82093	0.99953	NaN	NaN
D6RGY8	Protein YIPF3;Protein YIPF3, 36 kDa form III	YIPF3	0	1	0	0	0	1	0	0	21.1	7.2886	NaN	NaN	NaN	NaN	NaN	NaN	NaN	NaN
D6RJ86	Vacuolar-sorting protein SNF8	SNF8	0	2	0	0	0	2	0	0	21.3	4.6235	NaN	0.61799	NaN	NaN	NaN	1.1752	NaN	NaN
D6RGE2	Isochorismatase domain-containing protein 1	ISOC1	3	3	0	0	3	3	0	0	21.3	26.945	0.93357	1.0317	NaN	NaN	1.0575	1.0257	NaN	NaN
D6RGG3	Collagen alpha-1(XII) chain	COL12A1	3	3	0	0	2	3	0	0	1.9	7.4727	0.59335	0.98346	NaN	NaN	0.63679	0.73744	NaN	NaN
D6RIE3	Cytochrome c oxidase subunit 7A2, mitochondrial	COX7A2	1	1	0	0	1	1	0	0	14.3	10.944	1.0648	1.1202	NaN	NaN	0.85869	0.89967	NaN	NaN
D6RHX7	Mitogen-activated protein kinase-binding protein 1	MAPKBP1	1	2	0	0	1	2	0	0	4.8	2.2641	1.0482	1.0223	NaN	NaN	1.099	0.99752	NaN	NaN
D6RIY6	Exosome complex component RRP45	EXOSC9	2	3	0	0	2	3	0	0	9.9	11.782	1.2384	1.0207	NaN	NaN	1.0142	0.94545	NaN	NaN
D6RJ07	Zinc finger protein 346	ZNF346	5	5	0	0	5	5	0	0	29.7	12.424	1.0488	0.84777	NaN	NaN	0.87345	1.0538	NaN	NaN
E2QRB3	Pyrroline-5-carboxylate reductase 1, mitochondrial;Pyrroline-5-carboxylate reductase	PYCR1	9	10	0	0	8	9	0	0	55.9	101.32	0.94704	0.59	NaN	NaN	0.61682	0.96146	NaN	NaN
E5KLJ9	Dynamin-like 120 kDa protein, mitochondrial;Dynamin-like 120 kDa protein, form S1	OPA1	13	10	0	0	13	10	0	0	17.9	29.684	1.0748	1.1143	NaN	NaN	1.1006	0.87031	NaN	NaN
E5RFP0	NudC domain-containing protein 2	NUDCD2	6	6	0	0	6	6	0	0	43.9	74.394	0.80394	0.93008	NaN	NaN	1.0315	0.66274	NaN	NaN
E5RGN3	Copper transport protein ATOX1	ATOX1	5	4	0	0	5	4	0	0	74.6	54.778	1.0169	1.0102	NaN	NaN	1.091	0.94599	NaN	NaN
E5RGQ3	RWD domain-containing protein 1	RWDD1	3	2	0	0	3	2	0	0	51.4	6.7079	1.1095	1.0133	NaN	NaN	1.513	1.1951	NaN	NaN
E5RGS2	Receptor expression-enhancing protein;Receptor expression-enhancing protein 4	REEP4	1	0	0	0	1	0	0	0	9.2	2.6362	NaN	NaN	NaN	NaN	NaN	NaN	NaN	NaN
H0YC27	Regulator of microtubule dynamics protein 1	RMDN1	1	0	0	0	1	0	0	0	12.1	2.1119	NaN	NaN	NaN	NaN	NaN	NaN	NaN	NaN
E5RHG8	Transcription elongation factor B polypeptide 1	TCEB1	7	7	0	0	7	7	0	0	83.1	323.31	0.88636	0.96907	NaN	NaN	0.94793	0.94551	NaN	NaN
E5RHM7	TELO2-interacting protein 2	TTI2	1	1	0	0	1	1	0	0	12.9	8.3473	0.78053	0.93366	NaN	NaN	0.78727	0.87213	NaN	NaN
E5RHR9		ZFAND1	0	1	0	0	0	1	0	0	18.6	-2	NaN	NaN	NaN	NaN	NaN	NaN	NaN	NaN	+
E5RHW4	Erlin-2	ERLIN2	4	7	0	0	2	4	0	0	27.5	53.057	0.70583	0.94778	NaN	NaN	0.9135	0.79985	NaN	NaN
E5RI94	TBC1 domain family member 31	TBC1D31	2	1	0	0	2	1	0	0	6	2.4008	NaN	NaN	NaN	NaN	NaN	NaN	NaN	NaN
E5RIA4	Aspartyl aminopeptidase	DNPEP	6	5	0	0	6	5	0	0	23.8	14.903	0.94774	0.72097	NaN	NaN	1.0104	0.91869	NaN	NaN
E5RIW3	Tubulin-specific chaperone A	TBCA	12	8	0	0	12	8	0	0	76.2	47.137	0.97212	0.99859	NaN	NaN	1.0349	1.0141	NaN	NaN
E5RJN7	Double-stranded RNA-binding protein Staufen homolog 2	STAU2	6	6	0	0	5	5	0	0	35	30.9	1.0154	0.91483	NaN	NaN	0.91474	0.90012	NaN	NaN
E5RJR5	S-phase kinase-associated protein 1	SKP1	9	9	0	0	7	8	0	0	62.6	50.802	1.0113	0.92428	NaN	NaN	0.9712	0.96626	NaN	NaN
E5RJZ1	Cytochrome c oxidase subunit 7A-related protein, mitochondrial	COX7A2L	3	3	0	0	3	3	0	0	67.1	17.746	0.93898	0.91802	NaN	NaN	0.94964	1.0351	NaN	NaN
E5RK41	Pre-mRNA-splicing factor SLU7	SLU7	1	1	0	0	1	1	0	0	21.7	18.43	NaN	NaN	NaN	NaN	NaN	NaN	NaN	NaN
E5RK69	Annexin	ANXA6	27	25	0	0	1	1	0	0	63.7	28.211	0.93182	0.89108	NaN	NaN	0.86521	0.88186	NaN	NaN
E7EM64	COP9 signalosome complex subunit 6	COPS6	6	5	0	0	6	5	0	0	26.4	28.187	1.0016	0.95905	NaN	NaN	1.0286	0.9356	NaN	NaN
E7EMF1	Integrin alpha-2	ITGA2	4	3	0	0	4	3	0	0	8.1	14.968	1.0247	0.82713	NaN	NaN	1.1335	0.80508	NaN	NaN
J3QLD9	Flotillin-2	FLOT2	10	8	0	1	10	8	0	1	33.2	46.634	0.94399	0.89505	NaN	NaN	0.89808	0.85966	NaN	NaN
G3V2V8	Epididymal secretory protein E1	NPC2	3	3	0	0	3	3	0	0	39.3	19.384	1.0814	1.0562	NaN	NaN	0.99329	1.0729	NaN	NaN
F5H3K2	Uncharacterized protein C12orf43	C12orf43	1	0	0	0	1	0	0	0	12.2	2.7601	NaN	NaN	NaN	NaN	NaN	NaN	NaN	NaN
E7ENJ6	AP-1 complex subunit mu-1	AP1M1	9	8	1	0	7	6	1	0	31.6	38.129	0.88133	1.0085	NaN	NaN	1.0203	0.81731	NaN	NaN
E7ENV7	Copine-8;Copine-9;Copine-5	CPNE8	4	1	0	0	3	0	0	0	7.6	13.854	0.9902	NaN	NaN	NaN	1.2461	NaN	NaN	NaN
E7EV99	Alpha-adducin	ADD1	9	8	0	0	9	7	0	0	27.8	59.942	1.0529	0.93193	NaN	NaN	0.90105	1.0308	NaN	NaN
E7EPF2	RNA-binding motif, single-stranded-interacting protein 1;RNA-binding motif, single-stranded-interacting protein 3	RBMS1	2	2	1	1	1	1	0	0	19.7	16.308	0.31143	NaN	NaN	NaN	0.37943	NaN	NaN	NaN
F5H228	Triple functional domain protein	TRIO	1	0	0	1	1	0	0	1	1.9	-2	NaN	NaN	NaN	NaN	NaN	NaN	NaN	NaN	+
E7EPM6	Long-chain-fatty-acid--CoA ligase 1	ACSL1	5	10	0	0	5	10	0	0	18.5	48.759	1.0708	1.1418	NaN	NaN	1.0194	0.97159	NaN	NaN
E7EPN9	Protein PRRC2C	PRRC2C	25	22	2	7	24	21	1	6	17.7	109.68	0.86554	0.79668	0.84144	0.56164	0.75759	0.91295	0.84521	0.9138
E9PJI4	Serine/threonine-protein kinase Chk1	CHEK1	1	1	0	0	1	1	0	0	6.5	2.9907	NaN	NaN	NaN	NaN	NaN	NaN	NaN	NaN
E7EPT4	NADH dehydrogenase [ubiquinone] flavoprotein 2, mitochondrial	NDUFV2	5	5	0	0	5	5	0	0	33.3	31.77	1.0909	1.1009	NaN	NaN	1.0032	1.0148	NaN	NaN
E7EPV7	Alpha-synuclein	SNCA	5	5	0	0	5	5	0	0	54.8	30.637	1.1327	1.1266	NaN	NaN	0.85247	0.79639	NaN	NaN
E7EQ29	Beta-galactosidase	GLB1	2	2	0	0	2	2	0	0	7.1	4.504	1.1059	1.642	NaN	NaN	1.1383	1.5063	NaN	NaN
E7EQ61	Ubiquitin-like modifier-activating enzyme 5	UBA5	4	4	0	0	4	4	0	0	26	27.802	1.1269	1.0123	NaN	NaN	0.97429	1.2342	NaN	NaN
E7EQ69	N-alpha-acetyltransferase 50	NAA50	7	9	0	0	7	9	0	0	67.9	43.103	0.95991	1.0638	NaN	NaN	0.95612	1.0068	NaN	NaN
E7EQB8	Isocitrate dehydrogenase [NAD] subunit, mitochondrial;Isocitrate dehydrogenase [NAD] subunit gamma, mitochondrial	IDH3G	5	3	0	0	5	3	0	0	21.8	11.29	1.2045	1.1215	NaN	NaN	0.98698	1.224	NaN	NaN
E7EQG2	Eukaryotic initiation factor 4A-II;Eukaryotic initiation factor 4A-II, N-terminally processed	EIF4A2	16	12	5	7	1	1	0	0	37.8	3.0175	NaN	1.0214	NaN	NaN	NaN	0.86052	NaN	NaN
E7EQI7	WASH complex subunit strumpellin	KIAA0196	2	1	0	0	2	1	0	0	2.7	3.7359	0.9576	NaN	NaN	NaN	0.79059	NaN	NaN	NaN
E7EQR4	Ezrin	EZR	40	42	0	4	28	29	0	1	62.1	323.31	1.0351	0.98288	NaN	NaN	1.0276	1.1027	NaN	NaN
E9PES6	High mobility group protein B3	HMGB3	7	8	0	0	7	8	0	0	54.9	29.722	1.0143	0.96109	NaN	NaN	0.94896	0.92861	NaN	NaN
E7ERS3	Zinc finger CCCH domain-containing protein 18	ZC3H18	2	5	4	5	2	5	4	5	13.2	22.165	0.95207	1.2184	0.94102	0.86227	1.1146	1.0322	1.0383	1.007
E9PEI4	Focal adhesion kinase 1	PTK2	1	1	0	0	1	1	0	0	3.2	2.3188	NaN	NaN	NaN	NaN	NaN	NaN	NaN	NaN
E7ESU0	Ubiquitin carboxyl-terminal hydrolase;Ubiquitin carboxyl-terminal hydrolase 19	USP19	4	4	0	0	4	4	0	0	8.6	14.007	0.85126	0.9395	NaN	NaN	0.81419	0.96751	NaN	NaN
E7ESY4	Metastasis-associated protein MTA1	MTA1	6	6	0	0	4	2	0	0	15.5	32.962	0.88566	0.9642	NaN	NaN	0.76534	0.99134	NaN	NaN
E7ET49	Sn1-specific diacylglycerol lipase beta	DAGLB	1	2	0	0	1	2	0	0	2.9	2.153	NaN	NaN	NaN	NaN	NaN	NaN	NaN	NaN
H0Y9G6	39S ribosomal protein L3, mitochondrial	MRPL3	4	2	0	0	4	2	0	0	20.7	8.8502	1.0497	0.9807	NaN	NaN	0.98639	1.0515	NaN	NaN
E7ETY7	Glutathione peroxidase;Probable glutathione peroxidase 8	GPX8	2	2	0	0	2	2	0	0	32.9	2.7388	1.022	0.99339	NaN	NaN	1.0576	0.94936	NaN	NaN
E7ETZ4	Basic leucine zipper and W2 domain-containing protein 2	BZW2	11	9	0	1	11	9	0	1	27.5	61.888	1.0024	0.99507	NaN	NaN	0.99137	1.0521	NaN	NaN
E7EU96	Casein kinase II subunit alpha 3;Casein kinase II subunit alpha	CSNK2A1	7	6	0	1	7	6	0	1	39	73.591	1.06	1.1455	NaN	NaN	1.0656	1.0644	NaN	NaN
E7EUA0	Nexilin	NEXN	0	3	0	0	0	3	0	0	6.9	5.5314	NaN	0.8342	NaN	NaN	NaN	1.1733	NaN	NaN
E7EUU4	Eukaryotic translation initiation factor 4 gamma 1	EIF4G1	52	46	5	9	46	43	5	9	40.1	323.31	0.9553	0.96386	1.9914	1.1341	1.0035	0.95916	0.97187	2.3176
E7EVA0	Microtubule-associated protein;Microtubule-associated protein 4	MAP4	45	44	0	1	37	36	0	0	30.1	323.31	0.94358	0.96117	NaN	NaN	0.9664	0.9328	NaN	NaN
E7EVC7	Autophagy-related protein 16-1	ATG16L1	1	1	0	0	1	1	0	0	4.8	3.8891	NaN	NaN	NaN	NaN	NaN	NaN	NaN	NaN
H0Y5B5	Protein polybromo-1	PBRM1	4	2	0	0	4	2	0	0	3.2	3.9981	0.71746	1.0875	NaN	NaN	1.328	0.80763	NaN	NaN
G3V2E7	Kinesin light chain 1	KLC1	16	13	0	1	8	7	0	1	36.1	65.397	1.0861	0.96879	NaN	NaN	1.0716	0.92517	NaN	NaN
E7EVX8	U4/U6 small nuclear ribonucleoprotein Prp31	PRPF31	7	6	0	1	7	6	0	1	26.2	30.323	0.98817	0.92275	NaN	NaN	0.92079	0.93304	NaN	NaN
E7EW84	Exocyst complex component 6	EXOC6	1	2	0	0	1	2	0	0	3.7	3.7577	NaN	1.1598	NaN	NaN	NaN	0.9812	NaN	NaN
E7EWC2	Ras GTPase-activating-like protein IQGAP2	IQGAP2	5	4	0	0	2	1	0	0	3.1	2.9876	1.1538	1.0122	NaN	NaN	1.0355	1.1194	NaN	NaN
E7EWP0	NADH dehydrogenase [ubiquinone] 1 beta subcomplex subunit 5, mitochondrial	NDUFB5	2	2	0	0	2	2	0	0	15.8	5.7919	1.0629	0.93074	NaN	NaN	1.0283	0.97631	NaN	NaN
E7EWR4	Cleavage stimulation factor subunit 2	CSTF2	8	6	8	7	6	6	4	3	31.8	75.055	0.95647	1.0034	0.8404	0.87019	1.0027	0.95705	0.87431	0.9463
E7EX17	Eukaryotic translation initiation factor 4B	EIF4B	17	17	4	6	17	17	4	6	35.6	323.31	0.98433	1.0663	0.95413	0.79916	1.1073	0.97271	0.8949	1.1368
F5H2I2	ATP-dependent RNA helicase DDX55	DDX55	1	1	0	0	1	1	0	0	59.5	18.339	NaN	NaN	NaN	NaN	NaN	NaN	NaN	NaN
E7EX44	Caldesmon	CALD1	9	8	0	0	9	8	0	0	31.1	130.69	1.127	0.8653	NaN	NaN	0.78903	1.1871	NaN	NaN
E7EX82	Polyhomeotic-like protein 3	PHC3	2	0	0	0	2	0	0	0	4.5	2.2712	0.99437	NaN	NaN	NaN	0.90554	NaN	NaN	NaN
E7EX90	Dynactin subunit 1	DCTN1	19	20	0	0	19	20	0	0	23.4	85.553	0.89143	0.78129	NaN	NaN	0.83233	0.91612	NaN	NaN
F8VZJ2	Nascent polypeptide-associated complex subunit alpha;Nascent polypeptide-associated complex subunit alpha, muscle-specific form	NACA	7	8	0	0	7	8	0	0	55.1	323.31	0.92953	0.98302	NaN	NaN	1.0124	1.0094	NaN	NaN
E9PBL0	E3 ISG15--protein ligase HERC5	HERC5	1	1	0	0	1	1	0	0	2.7	4.7807	NaN	NaN	NaN	NaN	NaN	NaN	NaN	NaN
E9PCB6	Neurolysin, mitochondrial	NLN	5	5	0	1	5	5	0	1	16.5	11.718	0.88041	1.3016	NaN	NaN	1.3098	0.95532	NaN	NaN
E9PCN5	CCR4-NOT transcription complex subunit 10	CNOT10	0	1	0	0	0	1	0	0	3	2.6673	NaN	NaN	NaN	NaN	NaN	NaN	NaN	NaN
E9PD68		CRMP1	4	2	0	0	1	0	0	0	8.9	-2	NaN	NaN	NaN	NaN	NaN	NaN	NaN	NaN	+
E9PDF6	Unconventional myosin-Ib	MYO1B	9	7	0	0	9	7	0	0	13.5	53.663	1.1642	0.8667	NaN	NaN	1.034	1.0121	NaN	NaN
H0Y547	Phospholipid-transporting ATPase;Probable phospholipid-transporting ATPase IH	ATP11A	2	2	0	0	2	2	0	0	3.9	10.236	0.66177	0.74319	NaN	NaN	1.5933	1.1755	NaN	NaN
E9PKY5	Peptidyl-prolyl cis-trans isomerase;Peptidyl-prolyl cis-trans isomerase E	PPIE	5	5	0	1	4	4	0	0	31.5	40.931	1.0553	1.0906	NaN	NaN	1.0169	0.89952	NaN	NaN
E9PF16	Acyl-CoA synthetase family member 2, mitochondrial	ACSF2	3	2	0	0	3	2	0	0	11.4	24.35	1.2252	1.1929	NaN	NaN	1.0524	1.0387	NaN	NaN
E9PF19	Transducin beta-like protein 2	TBL2	11	8	1	2	11	8	1	2	38.2	119.03	1.087	0.94065	1.6267	1.1077	0.85251	1.0373	0.57705	1.4223
E9PFH2	Lysine-specific demethylase 5D	KDM5D	1	2	0	0	1	2	0	0	2.3	3.2093	NaN	NaN	NaN	NaN	NaN	NaN	NaN	NaN
E9PFK5	Nucleolar protein 14	NOP14	2	1	0	0	2	1	0	0	3.8	7.9843	1.2468	1.0077	NaN	NaN	1.062	1.2466	NaN	NaN
E9PFK9	Rab5 GDP/GTP exchange factor	RABGEF1	5	3	0	0	5	3	0	0	11.9	8.1308	1.239	1.0304	NaN	NaN	0.92288	0.93246	NaN	NaN
E9PFR3	Serine/threonine-protein phosphatase 2A 56 kDa regulatory subunit delta isoform	PPP2R5D	7	6	0	0	4	3	0	0	17.2	27.189	0.94477	0.98514	NaN	NaN	0.95722	1.0309	NaN	NaN
E9PG40	Amyloid beta A4 protein;N-APP;Soluble APP-alpha;Soluble APP-beta;C99;Beta-amyloid protein 42;Beta-amyloid protein 40;C83;P3(42);P3(40);C80;Gamma-secretase C-terminal fragment 59;Gamma-secretase C-terminal fragment 57;Gamma-secretase C-terminal fragment 50;C31	APP	7	4	1	2	6	3	0	1	11.5	20.572	1.0203	0.9861	NaN	NaN	0.80485	1.1301	NaN	NaN
E9PGC8	Microtubule-associated protein 1A;MAP1A heavy chain;MAP1 light chain LC2	MAP1A	1	0	0	0	1	0	0	0	0.4	-2	NaN	NaN	NaN	NaN	NaN	NaN	NaN	NaN	+
E9PGT1	Translin	TSN	15	13	0	0	15	13	0	0	60.1	117.87	0.98487	1.0215	NaN	NaN	1.0158	0.9709	NaN	NaN
E9PGT3	Ribosomal protein S6 kinase;Ribosomal protein S6 kinase alpha-1	RPS6KA1	12	6	0	0	8	2	0	0	25.7	15.291	1.0038	0.95038	NaN	NaN	0.98127	0.96461	NaN	NaN
E9PGT6	COP9 signalosome complex subunit 8	COPS8	3	3	0	0	3	3	0	0	28.9	71.329	0.88473	0.9351	NaN	NaN	0.89412	0.89841	NaN	NaN
E9PH64	NADH dehydrogenase [ubiquinone] 1 beta subcomplex subunit 9	NDUFB9	4	5	0	0	4	5	0	0	53	42.976	1.113	1.1453	NaN	NaN	1.0766	1.2677	NaN	NaN
E9PH99	Zinc finger protein 451	ZNF451	2	1	0	0	2	1	0	0	2.3	2.2306	NaN	NaN	NaN	NaN	NaN	NaN	NaN	NaN
E9PHI4	SUN domain-containing protein 1	SUN1	5	6	0	0	5	6	0	0	11.6	15.905	1.2082	1.1765	NaN	NaN	0.94529	1.3343	NaN	NaN
E9PHV4	DNA-directed RNA polymerase II subunit RPB4	POLR2D	3	3	0	0	3	3	0	0	53.6	11.455	0.97815	1.0663	NaN	NaN	1.0262	1.1168	NaN	NaN
E9PHY5	Band 4.1-like protein 2	EPB41L2	5	5	0	0	5	4	0	0	8	20.462	0.98386	0.88099	NaN	NaN	0.80709	0.73398	NaN	NaN
E9PI68	Signal peptidase complex subunit 2	SPCS2	6	7	0	1	6	7	0	1	39.7	323.31	0.98031	1.0437	NaN	NaN	1.0277	0.94313	NaN	NaN
E9PIG5	Rho-related GTP-binding protein RhoD	RHOD	0	1	0	0	0	1	0	0	10.4	6.661	NaN	NaN	NaN	NaN	NaN	NaN	NaN	NaN
E9PJ42	Transmembrane protein 41B	TMEM41B	1	1	0	0	1	1	0	0	9.7	11.301	NaN	0.76686	NaN	NaN	NaN	0.82355	NaN	NaN
E9PMY3	Protein tyrosine phosphatase type IVA 2	PTP4A2	3	3	0	0	2	2	0	0	66.7	11.814	0.98948	1.0582	NaN	NaN	0.96053	1.0479	NaN	NaN
E9PJH7	Mitochondrial glutamate carrier 1;Mitochondrial glutamate carrier 2	SLC25A22	3	2	0	0	3	2	0	0	9.9	19.425	1.5539	1.2666	NaN	NaN	0.88231	1.1805	NaN	NaN
G3V1E0	F-box only protein 3	FBXO3	1	0	0	0	1	0	0	0	4.7	3.3575	1.2083	NaN	NaN	NaN	1.5368	NaN	NaN	NaN
E9PKJ0	Protein wntless homolog	WLS	1	1	0	0	1	1	0	0	14.8	3.2919	NaN	NaN	NaN	NaN	NaN	NaN	NaN	NaN
E9PK03	Copper chaperone for superoxide dismutase	CCS	0	1	0	0	0	1	0	0	11.2	10.575	NaN	0.40232	NaN	NaN	NaN	1.243	NaN	NaN
E9PK54		HSPA8	17	18	8	11	0	1	0	0	87.4	-2	NaN	NaN	NaN	NaN	NaN	NaN	NaN	NaN	+
E9PS17	N-terminal kinase-like protein	SCYL1	10	11	0	1	10	11	0	1	24.3	40.74	0.92203	0.76085	NaN	NaN	0.68018	0.87039	NaN	NaN
E9PK91	Bcl-2-associated transcription factor 1	BCLAF1	17	17	17	21	0	0	1	1	33.2	-2	NaN	NaN	0.71801	1.3588	NaN	NaN	1.2142	0.96488	+
H7BXH2	Serine/threonine-protein phosphatase 6 regulatory subunit 3	PPP6R3	11	9	0	0	11	9	0	0	23	44.049	0.96481	1.1292	NaN	NaN	1.0522	0.99528	NaN	NaN
E9PKP7	Nucleolar transcription factor 1	UBTF	9	5	8	8	9	5	8	8	20.8	36.624	1.0055	0.99198	1.0322	0.91265	0.95538	1.0704	0.99286	1.0858
H0YDR3	Tetratricopeptide repeat protein 9C	TTC9C	1	1	0	0	1	1	0	0	21.7	3.1791	NaN	NaN	NaN	NaN	NaN	NaN	NaN	NaN
I3L3B4	Vitamin K epoxide reductase complex subunit 1	VKORC1	1	1	0	0	1	1	0	0	12.5	15.553	NaN	NaN	NaN	NaN	NaN	NaN	NaN	NaN
E9PM92	Small acidic protein	C11orf58	6	5	0	0	6	5	0	0	34.4	105.78	1.0148	1.0776	NaN	NaN	1.1164	1.0811	NaN	NaN
E9PMA0	Apoptosis-inducing factor 1, mitochondrial	AIFM1	8	7	0	0	0	1	0	0	38	-2	NaN	NaN	NaN	NaN	NaN	NaN	NaN	NaN	+
E9PMG1	RalBP1-associated Eps domain-containing protein 1	REPS1	2	1	0	0	2	1	0	0	3.8	4.7688	NaN	NaN	NaN	NaN	NaN	NaN	NaN	NaN
E9PMQ6	Heat shock factor protein 1	HSF1	0	1	0	0	0	1	0	0	3.2	2.5052	NaN	NaN	NaN	NaN	NaN	NaN	NaN	NaN
E9PRJ3	Tetraspanin;CD151 antigen	CD151	2	3	0	0	2	3	0	0	14	6.3778	1.0609	0.83644	NaN	NaN	0.83825	1.1622	NaN	NaN
E9PMS6	LIM domain only protein 7	LMO7	18	14	1	0	18	14	1	0	25.9	108.93	1.0164	0.82845	0.6817	NaN	0.96166	1.1108	0.94865	NaN
E9PN76	RING finger protein 214	RNF214	2	3	0	0	2	3	0	0	13.3	5.9414	NaN	0.84208	NaN	NaN	NaN	1.4584	NaN	NaN
E9PN81	Ribonuclease H2 subunit C	RNASEH2C	3	3	0	0	3	3	0	0	17.4	8.26	0.94327	1.1264	NaN	NaN	0.96979	0.85833	NaN	NaN
E9PNH9		CPSF3L	0	0	1	0	0	0	1	0	7.3	-2	NaN	NaN	NaN	NaN	NaN	NaN	NaN	NaN	+
E9PNR2	Ras and Rab interactor 1	RIN1	1	0	0	0	1	0	0	0	2.6	3.8497	NaN	NaN	NaN	NaN	NaN	NaN	NaN	NaN
E9PNW8	Fatty acyl-CoA reductase 1	FAR1	1	2	0	0	1	2	0	0	7.8	7.2241	NaN	0.89816	NaN	NaN	NaN	0.59068	NaN	NaN
E9PQA5	Zinc finger protein-like 1	ZFPL1	1	1	0	0	1	1	0	0	8.7	2.4047	NaN	NaN	NaN	NaN	NaN	NaN	NaN	NaN
E9PPG8	Protein Hikeshi	C11orf73	2	1	0	0	2	1	0	0	14.9	5.5396	1.422	NaN	NaN	NaN	1.0845	NaN	NaN	NaN
E9PPM8	Deoxyribose-phosphate aldolase	DERA	5	3	0	0	5	3	0	0	25.1	10.384	0.75842	0.68191	NaN	NaN	0.6843	0.70659	NaN	NaN
E9PPQ1	Tumor protein D53	TPD52L1	4	3	1	0	4	3	1	0	42.4	28.242	0.88996	0.57886	NaN	NaN	0.72684	0.66206	NaN	NaN
E9PPW7	NADH dehydrogenase [ubiquinone] iron-sulfur protein 8, mitochondrial	NDUFS8	3	4	0	0	3	4	0	0	27.2	27.232	1.0919	1.2415	NaN	NaN	1.0667	1.0112	NaN	NaN
E9PPY3	Ribosomal RNA-processing protein 8	RRP8	3	3	0	0	3	3	0	0	16	26.663	0.88996	0.88004	NaN	NaN	0.79519	0.86388	NaN	NaN
E9PQM0	Phosphatidylglycerophosphatase and protein-tyrosine phosphatase 1	PTPMT1	1	0	0	0	1	0	0	0	7.7	6.2079	NaN	NaN	NaN	NaN	NaN	NaN	NaN	NaN
E9PQM8	Histone-lysine N-methyltransferase SETDB1	SETDB1	0	1	1	1	0	1	1	1	6.9	3.8345	NaN	NaN	NaN	NaN	NaN	NaN	NaN	NaN
E9PR30	40S ribosomal protein S30	FAU	2	2	0	0	2	2	0	0	11.2	6.9229	0.99266	0.98982	NaN	NaN	1.0049	1.0111	NaN	NaN
E9PRJ5	NADH dehydrogenase [ubiquinone] 1 subunit C2;NADH dehydrogenase [ubiquinone] 1 subunit C2, isoform 2	NDUFC2	3	3	0	0	3	3	0	0	31	2.789	1.0768	1.1686	NaN	NaN	0.93185	1.0189	NaN	NaN
E9PRQ7	UBX domain-containing protein 1	UBXN1	7	7	0	0	7	7	0	0	48.1	202.95	1.0392	0.94647	NaN	NaN	0.97474	0.88495	NaN	NaN
J3KND1	Protein SAAL1	SAAL1	3	4	0	0	3	4	0	0	10.1	14.301	0.81475	1.0803	NaN	NaN	1.0447	0.73815	NaN	NaN
E9PSI1	Charged multivesicular body protein 4a	CHMP4A	4	4	0	0	4	4	0	0	6.5	52.592	1.0463	0.92197	NaN	NaN	1.0396	1.1756	NaN	NaN
F1T0I1	Protein transport protein Sec16A	SEC16A	21	25	0	0	21	25	0	0	24	87.24	0.78872	0.95057	NaN	NaN	0.82076	0.80293	NaN	NaN
F2Z2B0	Mitochondrial import inner membrane translocase subunit Tim10 B	TIMM10B	1	1	0	0	1	1	0	0	35.2	2.9006	NaN	NaN	NaN	NaN	NaN	NaN	NaN	NaN
F2Z2B9	Gamma-tubulin complex component 2	TUBGCP2	3	2	0	0	3	2	0	0	5.3	6.9403	1.0788	1.1258	NaN	NaN	1.2104	0.77921	NaN	NaN
F2Z2T2	DNA repair protein complementing XP-A cells	XPA	1	1	0	0	1	1	0	0	9.1	8.8645	NaN	NaN	NaN	NaN	NaN	NaN	NaN	NaN
H0Y4W2	Transformation/transcription domain-associated protein	TRRAP	2	2	0	0	2	2	0	0	1.2	2.2889	NaN	NaN	NaN	NaN	NaN	NaN	NaN	NaN
F2Z2W7	tRNA (uracil-5-)-methyltransferase homolog A	TRMT2A	2	2	0	1	2	2	0	1	4.8	4.6014	0.77736	0.70197	NaN	NaN	0.98077	0.96108	NaN	NaN
F2Z2X4	Exportin-4	XPO4	2	1	0	0	2	1	0	0	2.7	3.878	NaN	NaN	NaN	NaN	NaN	NaN	NaN	NaN
F2Z2Y8	Toll-interacting protein	TOLLIP	2	2	0	0	2	2	0	0	12.7	4.1711	0.78364	1.0748	NaN	NaN	0.80384	0.73888	NaN	NaN
J3JS74	Granulocyte-macrophage colony-stimulating factor receptor subunit alpha	CSF2RA	1	1	0	0	1	1	0	0	4.6	4.1704	NaN	NaN	NaN	NaN	NaN	NaN	NaN	NaN
F2Z3H6	B-cell CLL/lymphoma 7 protein family member B	BCL7B	2	2	0	0	2	2	0	0	33.8	5.2415	0.79709	NaN	NaN	NaN	0.77712	NaN	NaN	NaN
F2Z3J9	Prostaglandin reductase 1	PTGR1	11	10	0	0	11	10	0	0	36.3	84.371	0.90253	0.90294	NaN	NaN	0.83764	0.95393	NaN	NaN
F8WBK6	Beta-glucuronidase	GUSB	1	0	0	0	1	0	0	0	6.7	2.1544	NaN	NaN	NaN	NaN	NaN	NaN	NaN	NaN
F5GWE5	Phosphatidylinositol transfer protein alpha isoform	PITPNA	4	2	0	0	3	1	0	0	26.3	7.6322	1.0385	0.98896	NaN	NaN	0.939	1.1318	NaN	NaN
F5GWH5	Transmembrane protein 258	TMEM258	1	1	0	0	1	1	0	0	16.3	3.7868	0.9989	1.0975	NaN	NaN	0.97874	1.0172	NaN	NaN
F5GWN5	Phosphatidylinositol 4-phosphate 3-kinase C2 domain-containing subunit beta	PIK3C2B	9	10	0	0	9	10	0	0	9.5	44.008	1.0742	0.97365	NaN	NaN	1.1127	1.1089	NaN	NaN
F5GWT4	Serine/threonine-protein kinase WNK1	WNK1	9	7	0	0	8	7	0	0	7.8	25.334	1.0014	1.4303	NaN	NaN	1.3144	1.1239	NaN	NaN
F5GX39	Transmembrane emp24 domain-containing protein 2	TMED2	4	2	0	0	4	2	0	0	43.1	8.9167	1.2837	1.0018	NaN	NaN	1.1063	1.1317	NaN	NaN
F5GXJ9	CD166 antigen	ALCAM	10	8	7	12	10	8	7	12	43	73.472	1.0465	1.0204	1.146	0.71668	1.1074	1.1447	0.87218	1.0937
F5GXU9	2-oxoisovalerate dehydrogenase subunit alpha, mitochondrial	BCKDHA	1	1	0	0	1	1	0	0	11.6	4.4249	NaN	NaN	NaN	NaN	NaN	NaN	NaN	NaN
F5GXW6	Brain protein I3	BRI3	1	1	0	0	1	1	0	0	20.4	4.2707	1.1004	1.2444	NaN	NaN	1.2162	1.3546	NaN	NaN
F5GXX5	Dolichyl-diphosphooligosaccharide--protein glycosyltransferase subunit DAD1	DAD1	4	4	0	0	4	4	0	0	37.6	208.48	1.1114	1.1306	NaN	NaN	1.0449	1.0974	NaN	NaN
F5H7C6	COP9 signalosome complex subunit 7a	COPS7A	3	2	0	0	3	2	0	0	18.2	20.659	0.88781	0.68772	NaN	NaN	1.0338	1.0743	NaN	NaN
F5GYJ5	Succinate dehydrogenase assembly factor 2, mitochondrial	SDHAF2	1	1	0	0	1	1	0	0	9.1	3.1121	NaN	NaN	NaN	NaN	NaN	NaN	NaN	NaN
F5GYQ1	V-type proton ATPase subunit d 1	ATP6V0D1	8	7	1	0	8	7	1	0	34.9	94.075	1.0197	1.1044	NaN	NaN	0.86211	1.1114	NaN	NaN
F5GZI3	Partitioning defective 3 homolog	PARD3	1	1	0	0	1	1	0	0	2.8	2.5226	NaN	NaN	NaN	NaN	NaN	NaN	NaN	NaN
F5GZP6	Liprin-beta-1	PPFIBP1	1	2	0	0	1	2	0	0	4.4	3.1117	NaN	NaN	NaN	NaN	NaN	NaN	NaN	NaN
F5GZS6	4F2 cell-surface antigen heavy chain	SLC3A2	37	38	20	25	1	1	1	1	59.9	323.31	0.93152	1.1374	0.87444	0.93425	1.1125	0.89871	1.0546	0.86878
F5GZV7	Vesicle-associated membrane protein 1	VAMP1	1	1	0	0	1	0	0	0	20.7	16.02	NaN	NaN	NaN	NaN	NaN	NaN	NaN	NaN
H0YJ30	Gephyrin;Molybdopterin adenylyltransferase;Molybdopterin molybdenumtransferase	GPHN	1	0	0	0	1	0	0	0	5	3.2833	NaN	NaN	NaN	NaN	NaN	NaN	NaN	NaN
F5H0F9	Anaphase-promoting complex subunit 5	ANAPC5	4	4	0	0	4	4	0	0	8.8	8.623	1.0232	1.1854	NaN	NaN	0.96468	1.1289	NaN	NaN
F5H0U5	Glycolipid transfer protein	GLTP	2	2	0	0	2	2	0	0	14.2	5.414	0.85439	0.91034	NaN	NaN	1.6077	1.1536	NaN	NaN
F5H101	Nucleolar protein 8	NOL8	1	0	1	1	1	0	1	1	4.1	2.3595	NaN	NaN	0.9442	0.74337	NaN	NaN	1.1485	1.0849
F5H148	RNA polymerase I-specific transcription initiation factor RRN3	RRN3	2	0	0	0	2	0	0	0	7.9	3.8904	NaN	NaN	NaN	NaN	NaN	NaN	NaN	NaN
F5H157	Ras-related protein Rab-35	RAB35	4	3	0	0	4	3	0	0	31.4	43.289	0.96572	1.3263	NaN	NaN	1.1192	1.164	NaN	NaN
F5H1D6	DNA polymerase;DNA polymerase epsilon catalytic subunit A	POLE	2	1	0	1	2	1	0	1	1.5	4.2849	NaN	NaN	NaN	NaN	NaN	NaN	NaN	NaN
F5H1S9	tRNA pseudouridine synthase;tRNA pseudouridine synthase A, mitochondrial	PUS1	5	4	0	0	5	4	0	0	24.6	21.551	0.78487	1.0404	NaN	NaN	0.97023	0.88093	NaN	NaN
F5H245	L-lactate dehydrogenase;L-lactate dehydrogenase C chain	LDHC	3	2	1	0	2	1	0	0	6.9	2.8759	NaN	NaN	NaN	NaN	NaN	NaN	NaN	NaN
F5H2U8	High mobility group protein HMGI-C	HMGA2	1	1	0	0	1	1	0	0	23.2	2.3301	NaN	NaN	NaN	NaN	NaN	NaN	NaN	NaN
F5H365	Protein transport protein Sec23A	SEC23A	27	28	0	0	25	25	0	0	57.6	323.31	0.93727	0.96295	NaN	NaN	0.90097	0.88799	NaN	NaN
F5H442	Tumor susceptibility gene 101 protein	TSG101	6	5	0	0	6	5	0	0	19.7	21.121	0.83552	0.92901	NaN	NaN	1.0589	1.2988	NaN	NaN
F8VY35	Nucleosome assembly protein 1-like 1	NAP1L1	18	15	4	5	3	3	1	2	84.5	323.31	1.0228	1.0216	3.1699	0.88677	1.0335	0.97515	0.88902	3.0852
Q2HIZ1	Thrombospondin-3	THBS3	0	1	0	0	0	1	0	0	2.9	-2	NaN	NaN	NaN	NaN	NaN	NaN	NaN	NaN	+
H0Y8R1	G-rich sequence factor 1	GRSF1	13	13	13	13	13	13	13	13	59.7	229.78	0.88943	1.0342	0.91266	1.0124	0.98074	0.94778	1.0236	0.88407
F5H619	HEAT repeat-containing protein 5A	HEATR5A	5	10	0	0	5	10	0	0	8.4	34.936	1.0667	0.99939	NaN	NaN	0.94978	0.98403	NaN	NaN
F5H669	Cleavage and polyadenylation specificity factor subunit 7	CPSF7	8	7	4	4	8	7	4	4	32.1	42.922	0.95138	0.89497	1.0153	1.2948	0.84456	0.81392	0.95404	1.2832
F5H6Z0	Cyclin-dependent kinase 17	CDK17	3	2	1	1	2	1	0	0	6.6	3.5489	1.1018	NaN	NaN	NaN	1.0085	NaN	NaN	NaN
F5H702	39S ribosomal protein L48, mitochondrial	MRPL48	2	3	0	1	2	3	0	1	31.9	9.5864	1.0144	1.0359	NaN	1.2271	1.0312	0.98432	NaN	1.069
F5H8F7	Set1/Ash2 histone methyltransferase complex subunit ASH2	ASH2L	2	1	0	0	2	1	0	0	7.6	2.4409	0.90091	NaN	NaN	NaN	1.2578	NaN	NaN	NaN
F5H8H2	Mevalonate kinase	MVK	5	5	0	0	5	5	0	0	23	16.397	1.0493	1.0871	NaN	NaN	1.1485	1.0428	NaN	NaN
F6QDS0	ATP-dependent RNA helicase DDX19B;ATP-dependent RNA helicase DDX19A	DDX19A	15	16	1	1	0	0	0	0	51.8	15.848	1.1063	NaN	NaN	NaN	1.2308	NaN	NaN	NaN
F6QMI7	Dystonin	DST	10	10	0	1	10	9	0	1	5.2	34.069	0.68129	0.8063	NaN	NaN	0.84516	0.67382	NaN	NaN
H7C3P4	N-acetylglucosamine-6-sulfatase	GNS	7	7	5	6	7	7	5	6	30	29.492	1.0729	1.159	1.2026	0.67889	1.1644	1.0049	0.78234	1.186
F6T1Q0	2,5-phosphodiesterase 12	PDE12	7	6	0	0	7	6	0	0	29.4	29.611	1.0526	0.91964	NaN	NaN	0.85736	0.92144	NaN	NaN
Q5SZR4	Tudor and KH domain-containing protein	TDRKH	2	2	0	0	2	2	0	0	11.8	23.889	1.2709	1.054	NaN	NaN	0.91356	1.1338	NaN	NaN
F6TLX2	Glyoxalase domain-containing protein 4	GLOD4	12	12	0	0	12	12	0	0	27.7	71.709	1.0623	1.0298	NaN	NaN	1.1213	1.0544	NaN	NaN
F6UZG9	F-box only protein 18	FBXO18	3	3	0	0	3	3	0	0	4	3.8574	0.97434	0.90145	NaN	NaN	1.093	0.99806	NaN	NaN
F6VRR5	Polymerase delta-interacting protein 3	POLDIP3	10	10	1	2	10	10	1	2	32.6	144.2	1.1618	1.3425	1.44	1.4103	1.2048	1.2388	1.1152	1.3953
F6VZ39	RNA-binding protein 38;RNA-binding protein 24	RBM38	3	1	1	1	3	1	1	1	30.1	6.99	0.99403	NaN	NaN	0.75773	0.90466	NaN	NaN	0.98512
F8VPD4	CAD protein;Glutamine-dependent carbamoyl-phosphate synthase;Aspartate carbamoyltransferase;Dihydroorotase	CAD	54	55	5	6	51	52	5	5	41.6	323.31	0.85118	0.78272	2.8465	1.0286	0.79306	0.84237	0.72359	2.7608
J3KPG5	Bromodomain adjacent to zinc finger domain protein 2A	BAZ2A	2	0	0	0	2	0	0	0	1.6	3.7621	NaN	NaN	NaN	NaN	NaN	NaN	NaN	NaN
F8VUA2	Charged multivesicular body protein 1a	CHMP1A	4	3	0	0	4	3	0	0	23.2	7.4909	1.2837	1.5236	NaN	NaN	1.36	1.1296	NaN	NaN
F8VUB4	CCR4-NOT transcription complex subunit 2	CNOT2	4	2	0	0	4	2	0	0	18.7	8.2296	0.72071	0.97986	NaN	NaN	1.0246	0.80635	NaN	NaN
F8VV56	Tetraspanin;CD63 antigen	CD63	3	3	1	2	3	3	1	2	19.3	25.858	1.039	0.99308	0.95975	0.70249	0.9089	1.0826	0.73666	0.93117
F8VVA7	Coatomer subunit zeta-1	COPZ1	6	6	0	0	6	6	0	0	31.3	53.921	1.0442	0.98257	NaN	NaN	0.87811	0.99775	NaN	NaN
Q5JRU2	Caspase;Caspase-9;Caspase-9 subunit p35;Caspase-9 subunit p10	CASP9	2	2	0	0	2	2	0	0	16.5	16.322	0.70066	0.80273	NaN	NaN	0.94265	0.63501	NaN	NaN
F8VW44		SLC8B1	1	1	0	0	1	1	0	0	11.9	-2	NaN	NaN	NaN	NaN	NaN	NaN	NaN	NaN	+
F8VW96	Cysteine and glycine-rich protein 2	CSRP2	3	3	0	0	3	3	0	0	15.2	12.148	1.0599	NaN	NaN	NaN	0.94091	NaN	NaN	NaN
F8VXC8	SWI/SNF complex subunit SMARCC2	SMARCC2	5	4	0	0	4	2	0	0	7	30.3	0.88588	1.1245	NaN	NaN	1.0787	0.8663	NaN	NaN
F8VXI9	ARF GTPase-activating protein GIT2	GIT2	2	3	0	0	2	2	0	0	10.6	6.127	0.87728	1.3077	NaN	NaN	0.90549	0.87204	NaN	NaN
F8VXU5	Vacuolar protein sorting-associated protein 29	VPS29	6	7	0	0	6	7	0	0	39.3	52.328	0.97135	1.0815	NaN	NaN	0.97883	1.0708	NaN	NaN
F8VY02		ERP29	10	9	0	0	1	1	0	0	66.9	-2	NaN	NaN	NaN	NaN	NaN	NaN	NaN	NaN	+
F8VYE8	Serine/threonine-protein phosphatase;Serine/threonine-protein phosphatase PP1-gamma catalytic subunit	PPP1CC	17	17	0	1	3	3	0	0	61.2	43.702	0.90296	0.81432	NaN	NaN	1.107	0.88369	NaN	NaN
F8VZ74	Adenosine monophosphate-protein transferase FICD	FICD	1	1	0	0	1	1	0	0	11.5	-2	NaN	NaN	NaN	NaN	NaN	NaN	NaN	NaN	+
G3V1V7	Myosin-binding protein C, slow-type	MYBPC1	2	0	0	1	2	0	0	1	7.6	2.2112	NaN	NaN	NaN	NaN	NaN	NaN	NaN	NaN
F8W108	AT-rich interactive domain-containing protein 2	ARID2	1	1	0	0	1	1	0	0	2	3.7658	NaN	NaN	NaN	NaN	NaN	NaN	NaN	NaN
F8W1A4	Adenylate kinase 2, mitochondrial;Adenylate kinase 2, mitochondrial;Adenylate kinase 2, mitochondrial, N-terminally processed	AK2	16	16	0	0	16	16	0	0	70.7	233.14	1.0098	1.0686	NaN	NaN	0.98642	0.99051	NaN	NaN
F8W1I5	Myosin light chain 6B	MYL6B	4	4	2	2	2	2	0	0	27.4	4.8397	0.94967	0.85178	NaN	NaN	0.98259	1.2764	NaN	NaN
F8W1T6	RNA-binding motif, single-stranded-interacting protein 2	RBMS2	4	2	1	1	3	1	0	0	16.3	12.275	0.91613	1.2348	NaN	NaN	0.80253	1.0757	NaN	NaN
F8W1U7	ADP-ribosylation factor GTPase-activating protein 1	ARFGAP1	8	8	0	0	8	8	0	0	45.4	97.682	0.90889	0.8515	NaN	NaN	0.80882	0.9726	NaN	NaN
F8W543		NAP1L1	16	13	4	4	1	1	1	1	50	2.3839	NaN	NaN	NaN	NaN	NaN	NaN	NaN	NaN
F8W7C6		RPL10	10	10	3	3	1	1	1	0	50.3	2.937	NaN	NaN	NaN	NaN	NaN	NaN	NaN	NaN
F8W7Q4	Protein FAM162A	FAM162A	4	4	0	0	4	4	0	0	34.7	150.9	1.1301	1.0359	NaN	NaN	1.0909	1.1127	NaN	NaN
F8W7T7	Zinc finger protein 44;Zinc finger protein 563	ZNF44	0	1	1	1	0	1	1	1	6.3	2.1088	NaN	NaN	NaN	NaN	NaN	NaN	NaN	NaN
F8W7U8	Double-strand break repair protein MRE11A	MRE11A	13	14	0	0	13	14	0	0	29.7	47.581	0.76272	1.0834	NaN	NaN	1.1449	0.68106	NaN	NaN
F8W7W8	Hereditary hemochromatosis protein	HFE	0	1	0	0	0	1	0	0	4.2	2.3819	NaN	NaN	NaN	NaN	NaN	NaN	NaN	NaN
F8W8I6	Nucleolysin TIA-1 isoform p40	TIA1	8	8	9	10	1	1	1	1	44.7	138.02	0.65404	1.2803	0.52222	0.78501	0.96686	0.60249	0.86072	0.52887
F8W930	Insulin-like growth factor 2 mRNA-binding protein 2	IGF2BP2	4	6	0	0	3	5	0	0	14.7	16.974	1.0393	0.84972	NaN	NaN	1.0267	1.2343	NaN	NaN
F8W9S7	GTPase-activating protein and VPS9 domain-containing protein 1	GAPVD1	9	10	0	0	9	10	0	0	13.5	123.02	1.0072	0.96509	NaN	NaN	0.94202	0.93579	NaN	NaN
F8W9T3	Sorting nexin-4	SNX4	1	2	0	0	1	2	0	0	14.2	2.6738	NaN	1.1389	NaN	NaN	NaN	0.95807	NaN	NaN
F8W9X7	Coiled-coil domain-containing protein 93	CCDC93	2	4	0	0	2	4	0	0	7.9	6.0238	0.77248	1.0414	NaN	NaN	1.1995	1.1879	NaN	NaN
H0Y5T1	CLIP-associating protein 1	CLASP1	5	4	0	0	3	2	0	0	7.3	11.641	0.8565	0.88651	NaN	NaN	0.85981	0.92161	NaN	NaN
Q8NEC6	Myotubularin-related protein 1	MTMR1	1	2	0	0	1	2	0	0	14	2.4719	NaN	1.1266	NaN	NaN	NaN	1.1436	NaN	NaN
F8WAJ0	Probable ATP-dependent RNA helicase DDX31	DDX31	1	2	1	1	1	2	1	1	3.1	3.8387	NaN	NaN	0.93967	1.0974	NaN	NaN	0.70371	0.99047
F8WF27	Transmembrane 4 L6 family member 1	TM4SF1	1	1	0	0	1	1	0	0	8.9	2.3758	1.5654	NaN	NaN	NaN	1.2192	NaN	NaN	NaN
F8WBJ6	RNA-binding protein PNO1	PNO1	1	1	0	0	1	1	0	0	22.1	2.1746	NaN	NaN	NaN	NaN	NaN	NaN	NaN	NaN
F8WCD0	E3 ubiquitin-protein ligase RNF149	RNF149	4	5	2	3	4	5	2	3	16.8	14.49	1.8247	0.75813	1.104	0.59673	0.61472	0.97366	0.80591	0.88078
F8WCF6	Actin-related protein 2/3 complex subunit 4	ARPC4-TTLL3	7	7	0	0	7	7	0	0	43.1	41.887	0.88526	0.98042	NaN	NaN	1.0652	0.9737	NaN	NaN
F8WCT7	Solute carrier family 35 member F6	SLC35F6	0	1	0	0	0	1	0	0	27.5	2.9892	NaN	NaN	NaN	NaN	NaN	NaN	NaN	NaN
H7BXL1	Transmembrane protein 41A	TMEM41A	1	1	0	0	1	1	0	0	13	2.6407	NaN	NaN	NaN	NaN	NaN	NaN	NaN	NaN
V9GZ75		C7orf55-LUC7L2	2	2	1	3	0	0	0	1	59.3	-2	NaN	NaN	NaN	NaN	NaN	NaN	NaN	NaN	+
F8WF48	Translocation protein SEC62	SEC62	2	1	1	1	2	1	1	1	21.2	4.2563	NaN	NaN	1.0927	0.96147	NaN	NaN	1.0132	1.0892
G0XQ39	Stromal interaction molecule 1	STIM1	1	2	0	0	1	2	0	0	5.1	5.7049	NaN	1.0702	NaN	NaN	NaN	1.269	NaN	NaN
G3V0I5	NADH dehydrogenase [ubiquinone] flavoprotein 1, mitochondrial	NDUFV1	8	9	0	0	8	9	0	0	32.4	35.74	1.0633	1.0097	NaN	NaN	1.0771	1.003	NaN	NaN
G3V198	Nuclear pore complex protein Nup160	NUP160	10	11	0	0	10	11	0	0	13.1	80.402	1.0506	1.0424	NaN	NaN	1.0225	0.87682	NaN	NaN
G3V1D0	Echinoderm microtubule-associated protein-like 3	EML3	2	1	0	0	2	1	0	0	3.9	7.8048	0.94659	0.76933	NaN	NaN	0.87621	1.233	NaN	NaN
G3V235	Cyclin-K	CCNK	2	1	0	0	2	1	0	0	24.8	5.2815	0.85245	NaN	NaN	NaN	0.96031	NaN	NaN	NaN
G3V2I9	Protein NDRG2	NDRG2	2	2	0	0	2	2	0	0	24.6	41.541	0.94353	0.76614	NaN	NaN	1.1856	1.0553	NaN	NaN
G3V2Q1	Heterogeneous nuclear ribonucleoproteins C1/C2	HNRNPC	26	24	25	27	0	0	0	0	77.7	2.7709	NaN	NaN	1.7124	1.7434	NaN	NaN	2.8559	1.9299
G3V2S6	V-type proton ATPase subunit D	ATP6V1D	2	1	0	0	2	1	0	0	16.7	4.7918	1.1198	0.87104	NaN	NaN	1.4895	0.87147	NaN	NaN
G3V325	ATP synthase subunit f, mitochondrial	ATP5J2-PTCD1	4	4	0	0	2	2	0	0	5.6	2.6297	0.94886	0.97223	NaN	NaN	0.90426	1.0027	NaN	NaN
G3V4C1	Heterogeneous nuclear ribonucleoproteins C1/C2	HNRNPC	26	25	25	28	1	1	1	2	77.1	323.31	1.0178	1.1273	0.96284	0.91298	1.0599	1.0123	1.0234	1.0026
G3V4K3	Spermatogenesis-defective protein 39 homolog	VIPAS39	1	1	0	0	1	1	0	0	2.5	3.1754	NaN	NaN	NaN	NaN	NaN	NaN	NaN	NaN
G3V4M9	Inositol-tetrakisphosphate 1-kinase	ITPK1	0	1	0	0	0	1	0	0	7.5	6.1283	NaN	NaN	NaN	NaN	NaN	NaN	NaN	NaN
G3V4P8	Glia maturation factor beta	GMFB	6	4	0	0	6	4	0	0	61.3	78.006	1.0034	1.1416	NaN	NaN	1.0823	0.9828	NaN	NaN
G3V529	ATP-dependent RNA helicase DDX24	DDX24	6	4	4	4	6	4	4	4	19	30.84	1.092	1.0306	0.97879	1.0119	1.0951	1.0375	1.0093	0.98003
G3V576		HNRNPC	20	16	18	20	1	0	0	0	74.5	-2	NaN	NaN	NaN	NaN	NaN	NaN	NaN	NaN	+
G3V599	Melanoma inhibitory activity protein 2	MIA2	3	2	0	0	3	2	0	0	3.7	8.1666	1.3203	NaN	NaN	NaN	0.94883	NaN	NaN	NaN
G3V5T9	Cyclin-dependent kinase 2	CDK2	9	7	1	1	7	5	0	0	37.6	26.05	0.81296	0.98543	NaN	NaN	1.0775	0.68429	NaN	NaN
G3V5V3	Nuclear export mediator factor NEMF	NEMF	4	1	0	0	4	1	0	0	6.6	6.3094	0.96436	NaN	NaN	NaN	1.2134	NaN	NaN	NaN
H0YIY8	Serine/threonine-protein phosphatase 4 regulatory subunit 3A	SMEK1	3	2	0	0	2	1	0	0	8.8	10.291	0.83231	0.95811	NaN	NaN	0.92747	0.70517	NaN	NaN
G3XAH6	Poly(A) polymerase alpha;Poly(A) polymerase beta	PAPOLA	5	3	0	0	4	2	0	0	8.6	9.9514	1.1201	0.93831	NaN	NaN	0.85003	0.97193	NaN	NaN
G3XAI2	Laminin subunit beta-1	LAMB1	13	11	3	4	13	11	3	4	12.8	83.765	1.0556	1.0738	1.603	0.90005	0.96845	0.98671	0.91183	1.9362
G3XAN4	Translocating chain-associated membrane protein 1	TRAM1	2	3	0	1	2	3	0	1	13.2	37.112	1.1545	0.87548	NaN	NaN	0.91013	1.1518	NaN	NaN
G5E9A6	Ubiquitin carboxyl-terminal hydrolase;Ubiquitin carboxyl-terminal hydrolase 11	USP11	8	9	0	0	6	8	0	0	17.5	34.192	0.95883	0.83447	NaN	NaN	0.88984	0.99137	NaN	NaN
G5E9C8	Son of sevenless homolog 1;Son of sevenless homolog 2	SOS1	2	1	0	0	2	1	0	0	1.6	2.4387	NaN	NaN	NaN	NaN	NaN	NaN	NaN	NaN
G5E9P5	39S ribosomal protein L52, mitochondrial	MRPL52	1	1	0	0	1	1	0	0	30	7.8577	NaN	NaN	NaN	NaN	NaN	NaN	NaN	NaN
G5E9Q6	Profilin;Profilin-2	PFN2	8	8	1	2	3	3	0	0	49.5	68.152	0.79956	0.93385	NaN	NaN	0.86621	0.81359	NaN	NaN
G5E9W7	28S ribosomal protein S22, mitochondrial	MRPS22	6	6	0	0	6	6	0	0	28.8	33.21	1.1234	1.1216	NaN	NaN	0.89222	1.1969	NaN	NaN
G5E9Z2	Cleft lip and palate transmembrane protein 1-like protein	CLPTM1L	5	4	0	0	5	4	0	0	24.1	20.386	0.91125	1.1849	NaN	NaN	1.2911	0.99454	NaN	NaN
G5EA06	28S ribosomal protein S27, mitochondrial	MRPS27	4	4	0	0	4	4	0	0	18.2	12.833	0.94939	1.0195	NaN	NaN	0.9136	1.0201	NaN	NaN
G5EA30	CUGBP Elav-like family member 1	CELF1	7	5	6	9	5	3	4	7	26.3	27.974	0.89713	1.168	0.79025	0.94394	1.0903	1.0405	1.0809	0.81383
G5EA31	Protein transport protein Sec24C	SEC24C	15	15	0	0	13	13	0	0	24.3	132.98	0.98624	0.95974	NaN	NaN	1.0167	1.0035	NaN	NaN
G5EA48	SLIT-ROBO Rho GTPase-activating protein 1	SRGAP1	3	1	0	0	3	1	0	0	4.2	2.972	1.1161	NaN	NaN	NaN	1.1084	NaN	NaN	NaN
G8JLB6	Heterogeneous nuclear ribonucleoprotein H;Heterogeneous nuclear ribonucleoprotein H, N-terminally processed	HNRNPH1	29	25	24	28	16	15	13	14	65.9	323.31	0.9951	0.99692	0.99341	0.97155	0.94783	0.96966	0.93917	0.98195
X6RM00	ELKS/Rab6-interacting/CAST family member 1	ERC1	5	2	0	0	5	2	0	0	7.7	8.8523	1.0439	0.97302	NaN	NaN	1.1913	1.0204	NaN	NaN
X6RLT1	Negative elongation factor C/D	NELFCD	4	2	1	0	4	2	1	0	16	7.7957	1.0892	1.0468	NaN	NaN	1.0477	0.94935	NaN	NaN
H0Y2V6	Centrosomal protein of 170 kDa	CEP170	5	4	0	0	5	4	0	0	7.4	46.609	0.74771	0.6972	NaN	NaN	0.95761	0.87656	NaN	NaN
H0Y3V5	Thyroid adenoma-associated protein	THADA	1	1	0	0	1	1	0	0	4.6	2.2831	NaN	NaN	NaN	NaN	NaN	NaN	NaN	NaN
H0Y3V8	Sphingosine-1-phosphate lyase 1	SGPL1	1	3	0	0	1	3	0	0	31.1	3.8254	0.91136	2.0959	NaN	NaN	0.91637	0.81445	NaN	NaN
H0Y465	Neurofibromin;Neurofibromin truncated	NF1	3	2	0	0	3	2	0	0	2	3.2467	1.0683	0.9495	NaN	NaN	0.77108	1.0003	NaN	NaN
H0Y498	ER degradation-enhancing alpha-mannosidase-like protein 3	EDEM3	2	1	0	0	2	1	0	0	6.8	3.7737	0.88009	NaN	NaN	NaN	0.92952	NaN	NaN	NaN
H0Y548	Peptidyl-prolyl cis-trans isomerase	PPIF	5	4	0	0	1	0	0	0	60	-2	NaN	NaN	NaN	NaN	NaN	NaN	NaN	NaN	+
H0Y621	Endoplasmic reticulum-Golgi intermediate compartment protein 3	ERGIC3	2	3	0	0	2	3	0	0	14.4	6.3029	1.1017	0.84754	NaN	NaN	0.8806	0.8742	NaN	NaN
H0Y626	Tripartite motif-containing protein 16	TRIM16	3	1	0	0	3	1	0	0	6.7	8.2774	0.76466	NaN	NaN	NaN	0.91872	NaN	NaN	NaN
H7C4B0	DNA topoisomerase;DNA topoisomerase 3-beta-1	TOP3B	1	0	0	0	1	0	0	0	11.3	2.8824	NaN	NaN	NaN	NaN	NaN	NaN	NaN	NaN
H0Y8C3	Mitochondrial carrier homolog 1	MTCH1	1	2	0	0	1	2	0	0	8.1	6.0627	0.67395	0.96784	NaN	NaN	1.1302	0.97016	NaN	NaN
H0YAB8	Transforming growth factor-beta-induced protein ig-h3	TGFBI	0	0	1	0	0	0	1	0	32.2	3.6307	NaN	NaN	NaN	NaN	NaN	NaN	NaN	NaN
H0Y8P4	U3 small nucleolar RNA-associated protein 15 homolog	UTP15	2	3	0	1	2	3	0	1	11.2	7.2106	0.85668	0.9453	NaN	1.0761	1.053	1.0068	NaN	0.77157
H0Y8X4	2-deoxynucleoside 5-phosphate N-hydrolase 1	DNPH1	5	4	0	0	5	4	0	0	25.1	26.714	0.97375	0.9809	NaN	NaN	0.98866	0.92841	NaN	NaN
H0Y8X6	E3 ubiquitin-protein ligase NEDD4	NEDD4	2	2	0	0	1	2	0	0	5.2	3.1794	NaN	NaN	NaN	NaN	NaN	NaN	NaN	NaN
H0Y947	Protein FAM81B	FAM81B	1	1	0	0	1	1	0	0	7.1	2.8432	NaN	NaN	NaN	NaN	NaN	NaN	NaN	NaN
H0Y993	Protein DEK	DEK	12	12	2	5	12	12	2	5	43.4	157.35	1.0283	1.1606	0.8947	0.78515	1.0444	1.0245	0.88102	0.90019
H0Y997	Thioredoxin domain-containing protein 15	TXNDC15	1	0	0	2	1	0	0	2	12.2	4.8391	NaN	NaN	NaN	0.77978	NaN	NaN	NaN	0.9714
H0Y9X1	Translation machinery-associated protein 16	TMA16	3	2	0	0	3	2	0	0	21.5	6.9702	0.77012	1.3081	NaN	NaN	0.97299	1.1489	NaN	NaN
H0YAN8	Rho guanine nucleotide exchange factor 10	ARHGEF10	1	1	0	1	1	1	0	1	4.1	4.2943	0.58956	0.70175	NaN	NaN	0.8817	0.47966	NaN	NaN
H0YAZ3	Vinexin	SORBS3	2	2	0	0	2	2	0	0	28	7.7643	0.87963	0.98355	NaN	NaN	0.9017	1.0166	NaN	NaN
H0YBY8	Ectonucleoside triphosphate diphosphohydrolase 4	ENTPD4	1	1	0	0	1	1	0	0	4.7	2.5424	NaN	NaN	NaN	NaN	NaN	NaN	NaN	NaN
H0YC42			11	9	1	0	2	0	0	0	59.4	2.9467	1.1746	NaN	NaN	NaN	0.9684	NaN	NaN	NaN
H0YCE7	Acidic fibroblast growth factor intracellular-binding protein	FIBP	2	0	0	0	2	0	0	0	19	3.2912	NaN	NaN	NaN	NaN	NaN	NaN	NaN	NaN
H0YCN4	DCN1-like protein;DCN1-like protein 5	DCUN1D5	3	4	0	0	3	4	0	0	19	7.3108	0.93636	1.0812	NaN	NaN	1.0185	1.0134	NaN	NaN
H0YCU9	Transgelin	TAGLN	0	1	1	2	0	1	1	2	18.5	7.0166	NaN	NaN	NaN	0.093404	NaN	NaN	NaN	0.070185
H0YD13	CD44 antigen	CD44	8	7	5	7	8	7	5	7	43.2	43.858	1.1806	0.87582	1.2012	0.8109	0.93694	1.1054	0.96302	1.1515
H0YE97		PICALM	2	2	0	0	1	1	0	0	29.1	3.2147	NaN	NaN	NaN	NaN	NaN	NaN	NaN	NaN
H0YD49		WDR78	0	0	1	0	0	0	1	0	12.3	-2	NaN	NaN	NaN	NaN	NaN	NaN	NaN	NaN	+
H0YDU8	Serine/threonine-protein phosphatase;Serine/threonine-protein phosphatase 5	PPP5C	10	10	0	0	10	10	0	0	35.7	129.63	1.0908	1.0304	NaN	NaN	1.0926	1.0107	NaN	NaN
H0YFA4	Cysteine-rich protein 2	CRIP2	1	2	0	0	1	2	0	0	25	10.642	NaN	1.487	NaN	NaN	NaN	0.85465	NaN	NaN
H0YFD6	Trifunctional enzyme subunit alpha, mitochondrial;Long-chain enoyl-CoA hydratase;Long chain 3-hydroxyacyl-CoA dehydrogenase	HADHA	40	42	2	2	40	42	2	2	64.5	323.31	1.0643	1.1206	1.9136	1.7746	0.99716	1.0283	1.1956	1.3977
H0YHA7	60S ribosomal protein L18	RPL18	6	7	3	3	6	7	3	3	43.7	213.25	0.99144	0.95205	1.5861	1.4686	0.96998	0.96496	1.0121	1.2437
H0YI09	Methyltransferase-like protein 7A	METTL7A	4	5	0	0	4	5	0	0	29.5	197.67	0.90409	1.0772	NaN	NaN	0.87134	0.97216	NaN	NaN
H0YIA6	Homeobox protein Hox-A11	HOXA11	1	1	0	0	1	1	0	0	4.9	2.4021	0.96987	NaN	NaN	NaN	0.99179	NaN	NaN	NaN
H0YIB5	Cilia- and flagella-associated protein 54	CFAP54	0	0	1	1	0	0	1	1	12.8	-2	NaN	NaN	NaN	NaN	NaN	NaN	NaN	NaN	+
H0YJ75	Serine/threonine-protein phosphatase 2A 56 kDa regulatory subunit gamma isoform	PPP2R5C	6	6	0	0	2	3	0	0	15.7	8.3998	0.97482	1.1132	NaN	NaN	0.93629	1.018	NaN	NaN
H0YJH6	Signal transducer and activator of transcription 6	STAT6	7	5	0	0	7	5	0	0	15.7	9.8274	1.1655	0.76792	NaN	NaN	0.75971	1.0677	NaN	NaN
H0YJV7	Transcriptional repressor protein YY1;Transcription factor YY2	YY1	3	3	0	0	3	3	0	0	19.5	7.5154	1.0583	0.96319	NaN	NaN	0.98764	0.99328	NaN	NaN
H0YME2	AN1-type zinc finger protein 6	ZFAND6	1	2	0	0	1	2	0	0	30.8	4.5739	NaN	0.97781	NaN	NaN	NaN	0.85896	NaN	NaN
H0YK98	LysM and putative peptidoglycan-binding domain-containing protein 2	LYSMD2	1	1	0	0	1	1	0	0	12	2.3753	NaN	NaN	NaN	NaN	NaN	NaN	NaN	NaN
H0YLJ2	Solute carrier family 12 member 1	SLC12A1	2	2	0	1	2	2	0	1	3.9	2.3543	0.94674	0.54703	NaN	NaN	3.9625	2.7708	NaN	NaN
H0YMC9	Vacuolar protein sorting-associated protein 18 homolog	VPS18	2	2	0	0	2	2	0	0	31.4	8.0574	0.86209	0.71782	NaN	NaN	0.9403	0.82064	NaN	NaN
H0YM23	Ankyrin repeat domain-containing protein 17	ANKRD17	6	5	0	0	2	3	0	0	4.8	6.5404	1.0593	0.98367	NaN	NaN	1.0752	0.98394	NaN	NaN
H0YMD2	Nucleolar and spindle-associated protein 1	NUSAP1	3	2	0	0	3	2	0	0	32.6	5.3888	0.81567	1.2903	NaN	NaN	0.79852	1.4219	NaN	NaN
H0YMJ6	Apoptosis-enhancing nuclease	AEN	1	1	0	0	1	1	0	0	12.3	-2	NaN	NaN	NaN	NaN	NaN	NaN	NaN	NaN	+
H0YMV8	40S ribosomal protein S27;40S ribosomal protein S27-like	RPS27L	3	3	2	2	1	1	1	0	32	3.3081	0.90167	NaN	NaN	NaN	1.062	NaN	NaN	NaN
H0YN81	WD repeat-containing protein 61;WD repeat-containing protein 61, N-terminally processed	WDR61	6	8	0	0	5	5	0	0	36.7	34.637	0.93985	0.93573	NaN	NaN	0.89989	0.8981	NaN	NaN
H0YNA7	Signal peptide peptidase-like 2A	SPPL2A	1	0	2	2	1	0	2	2	15.4	2.8257	NaN	NaN	1.0713	0.66001	NaN	NaN	0.7933	0.99405
H0YNG3	Signal peptidase complex catalytic subunit SEC11;Signal peptidase complex catalytic subunit SEC11A	SEC11A	5	5	0	0	5	5	0	0	23.9	18.759	1.0201	1.1298	NaN	NaN	0.95078	0.938	NaN	NaN
H0YNH8	Uveal autoantigen with coiled-coil domains and ankyrin repeats	UACA	2	2	0	0	2	2	0	0	2.3	2.7207	0.51716	0.86725	NaN	NaN	0.65364	0.69163	NaN	NaN
H0YNM5	POU domain protein;Pituitary-specific positive transcription factor 1	POU1F1	1	0	0	0	1	0	0	0	7.9	-2	1.0321	NaN	NaN	NaN	0.96309	NaN	NaN	NaN	+
H0YNW5	Deoxyuridine 5-triphosphate nucleotidohydrolase, mitochondrial	DUT	11	10	0	0	11	10	0	0	70.7	206.66	0.81729	0.9654	NaN	NaN	1.0531	0.8856	NaN	NaN
H0YNX7	GTP cyclohydrolase 1 feedback regulatory protein	GCHFR	1	1	0	0	1	1	0	0	23.9	11.16	1.1546	0.94021	NaN	NaN	0.85439	0.87396	NaN	NaN
H3BLV9	SRSF protein kinase 1	SRPK1	8	6	0	0	5	5	0	0	17.4	14.355	0.98034	0.83903	NaN	NaN	0.82863	1.0371	NaN	NaN
H3BM14	NEDD8 ultimate buster 1	NUB1	2	1	0	0	2	1	0	0	5.6	5.1656	1.6974	NaN	NaN	NaN	1.0791	NaN	NaN	NaN
H3BM75	TLD domain-containing protein 1	TLDC1	2	2	0	0	2	2	0	0	15	6.4287	0.99061	0.69783	NaN	NaN	0.54335	1.0464	NaN	NaN
H3BMA1	Mesothelin;Megakaryocyte-potentiating factor;Mesothelin, cleaved form	MSLN	0	2	0	0	0	2	0	0	4.8	2.4168	NaN	0.50697	NaN	NaN	NaN	0.66889	NaN	NaN
H3BMD8	cAMP-regulated phosphoprotein 19	ARPP19	3	3	0	0	2	2	0	0	30.5	12.479	1.0065	0.20948	NaN	NaN	1.1316	0.24425	NaN	NaN
H3BV80	RNA-binding protein with serine-rich domain 1	RNPS1	5	6	6	6	5	6	6	6	38.9	87.631	1.063	1.1504	0.92666	0.92365	1.2002	1.0383	0.97246	0.98973
H3BMU1	IST1 homolog	IST1	5	5	0	0	5	5	0	0	27.2	10.892	1.1269	0.8837	NaN	NaN	0.93519	1.2762	NaN	NaN
H3BPR6	Biogenesis of lysosome-related organelles complex 1 subunit 6	BLOC1S6	1	1	0	0	1	1	0	0	32.8	5.8591	NaN	0.54377	NaN	NaN	NaN	0.64682	NaN	NaN
H3BUQ9	Na(+)/H(+) exchange regulatory cofactor NHE-RF2	SLC9A3R2	1	1	0	0	1	1	0	0	7.8	7.7773	NaN	NaN	NaN	NaN	NaN	NaN	NaN	NaN
H3BN98	ADP-ribosylation factor-like protein 6-interacting protein 1	ARL6IP1	7	6	0	0	3	3	0	0	40.5	17.391	0.59561	0.80058	NaN	NaN	0.82412	0.67412	NaN	NaN
H3BNC9	40S ribosomal protein S17	RPS17	11	10	1	1	11	9	1	1	15.4	323.31	0.95901	0.98793	NaN	1.6448	1.0035	1.0034	NaN	1.4565
H3BNK8	M-phase phosphoprotein 6	MPHOSPH6	1	1	0	0	1	1	0	0	27.3	2.0646	NaN	NaN	NaN	NaN	NaN	NaN	NaN	NaN
H3BNT2	Ubiquinone biosynthesis protein COQ9, mitochondrial	COQ9	3	2	0	0	3	2	0	0	13.5	4.1459	1.0581	NaN	NaN	NaN	0.69589	NaN	NaN	NaN
H3BS10	Beta-hexosaminidase;Beta-hexosaminidase subunit alpha	HEXA	1	2	0	0	1	2	0	0	4.3	3.6667	NaN	0.85314	NaN	NaN	NaN	0.96041	NaN	NaN
H3BP71	E3 ubiquitin-protein ligase BRE1B	RNF40	4	4	1	1	2	2	1	1	7.3	4.9729	0.95596	0.92587	NaN	NaN	1.0528	0.92229	NaN	NaN
H3BPE1	Microtubule-actin cross-linking factor 1, isoforms 1/2/3/5	MACF1	10	10	1	1	9	8	1	1	2.7	56.082	1.0361	0.95112	NaN	0.015023	0.91858	0.94439	NaN	NaN
H3BPK3	Hydroxyacylglutathione hydrolase, mitochondrial	HAGH	5	4	0	1	5	4	0	1	31.8	14.425	0.96098	1.0464	NaN	NaN	1.0061	0.81902	NaN	NaN
H3BU63	Phosphopantothenoylcysteine decarboxylase	PPCDC	1	1	0	0	1	1	0	0	14.8	11.775	NaN	NaN	NaN	NaN	NaN	NaN	NaN	NaN
H3BQZ5	UPF0235 protein C15orf40	C15orf40	1	1	0	0	1	1	0	0	19.1	2.8433	NaN	0.65868	NaN	NaN	NaN	1.0147	NaN	NaN
H3BUD2	Dynactin subunit 5	DCTN5	1	1	0	0	1	1	0	0	18.9	3.6594	NaN	NaN	NaN	NaN	NaN	NaN	NaN	NaN
H3BRL3	Ubiquitin domain-containing protein UBFD1	UBFD1	3	3	0	0	3	3	0	0	20.3	16.611	1.1407	0.91219	NaN	NaN	1.0055	0.97833	NaN	NaN
K4DIB9	Cysteine-rich protein 1	CRIP1	1	1	0	0	1	1	0	0	60.9	2.0876	NaN	NaN	NaN	NaN	NaN	NaN	NaN	NaN
H3BRW3	FAD-linked sulfhydryl oxidase ALR;Sulfhydryl oxidase	GFER	2	2	0	0	2	2	0	0	35.8	8.9023	0.81471	1.0079	NaN	NaN	0.88203	1.2471	NaN	NaN
H3BSM3	DNA-directed RNA polymerase III subunit RPC5	POLR3E	1	1	0	0	1	1	0	0	29	2.1905	NaN	NaN	NaN	NaN	NaN	NaN	NaN	NaN
H3BTA2	Serine/threonine-protein phosphatase;Serine/threonine-protein phosphatase 4 catalytic subunit	PPP4C	7	5	0	0	5	3	0	0	37.8	53.806	0.88505	1.0203	NaN	NaN	1.0419	0.99568	NaN	NaN
H3BTN1		KIFC3	1	1	0	0	1	1	0	0	30	-2	NaN	NaN	NaN	NaN	NaN	NaN	NaN	NaN	+
H3BU49	ADP-ribosylation factor-like protein 2-binding protein	ARL2BP	1	1	0	0	1	1	0	0	10.6	2.3435	NaN	0.76714	NaN	NaN	NaN	1.2555	NaN	NaN
H3BU86	Syntaxin-16	STX16-NPEPL1	4	5	0	0	4	5	0	0	20.4	81.559	1.1947	0.78373	NaN	NaN	0.85992	1.416	NaN	NaN
H3BUH9	Glycine cleavage system H protein, mitochondrial	GCSH	2	3	0	0	2	3	0	0	50	55.746	1.0473	1.0469	NaN	NaN	1.0598	1.02	NaN	NaN
H3BUN4	Nucleolar protein 3	NOL3	5	4	0	0	5	4	0	0	67	29.131	1.0841	0.75537	NaN	NaN	0.92372	1.1295	NaN	NaN
H7C2Z6	Grancalcin	GCA	2	1	0	0	2	1	0	0	13	3.3557	0.89476	NaN	NaN	NaN	0.77431	NaN	NaN	NaN
H7BXI1	Extended synaptotagmin-2	ESYT2	26	25	0	0	26	25	0	0	48	155.16	1.0436	1.021	NaN	NaN	1.051	1.0518	NaN	NaN
H7BXZ6	Mitochondrial Rho GTPase;Mitochondrial Rho GTPase 1	RHOT1	0	1	0	0	0	1	0	0	3.4	3.2695	NaN	NaN	NaN	NaN	NaN	NaN	NaN	NaN
Q5JRG1	Nucleoporin p58/p45	NUPL1	3	3	0	0	3	3	0	0	6.9	8.0663	1.0985	0.97149	NaN	NaN	1.1088	0.77263	NaN	NaN
H7BYT1	Casein kinase I isoform delta	CSNK1D	1	2	0	0	1	2	0	0	10.8	3.0173	NaN	0.99088	NaN	NaN	NaN	0.86687	NaN	NaN
H7BZJ3		PDIA3	9	9	5	5	1	1	1	1	58.5	100.89	1.0271	0.96351	2.0334	1.0352	1.0104	0.91147	0.99742	1.8501
H7C022	WD repeat-containing protein 60	WDR60	1	2	0	0	1	2	0	0	2.9	2.0454	NaN	3.8205	NaN	NaN	NaN	1.3041	NaN	NaN
H7C087		ZCWPW2	1	0	0	0	1	0	0	0	9.7	-2	NaN	NaN	NaN	NaN	NaN	NaN	NaN	NaN	+
H7C155	RAF proto-oncogene serine/threonine-protein kinase	RAF1	2	0	0	0	2	0	0	0	7.6	5.0205	1.1561	NaN	NaN	NaN	0.75105	NaN	NaN	NaN
H7C1N2	Protein cordon-bleu	COBL	5	2	0	0	5	2	0	0	6	11.296	0.54172	1.0524	NaN	NaN	0.99012	0.29325	NaN	NaN
H7C1U8	Apolipoprotein O	APOO	2	2	0	0	1	1	0	0	19.7	16.242	1.1576	1.0528	NaN	NaN	1.1612	0.92198	NaN	NaN
H7C207	R3H domain-containing protein 1	R3HDM1	1	2	0	0	1	2	0	0	2.4	3.0317	NaN	0.84448	NaN	NaN	NaN	1.042	NaN	NaN
H7C222	Transporter;Sodium- and chloride-dependent creatine transporter 1	SLC6A8	0	1	0	0	0	1	0	0	8.6	3.8311	NaN	NaN	NaN	NaN	NaN	NaN	NaN	NaN
H7C231	BCL-6 corepressor	BCOR	0	2	0	0	0	2	0	0	2.1	2.1832	NaN	0.95405	NaN	NaN	NaN	0.91939	NaN	NaN
H7C2Q8	Probable rRNA-processing protein EBP2	EBNA1BP2	9	12	5	6	9	12	5	6	39.9	118.84	1.0581	0.99252	0.96827	1.0383	0.9974	1.0077	0.89432	1.0016
H7C3D5	Protein FAM134A	FAM134A	1	1	0	0	1	1	0	0	12.3	9.6996	NaN	NaN	NaN	NaN	NaN	NaN	NaN	NaN
H7C3X5	Syntaxin-5	STX5	3	3	0	0	3	3	0	0	41.8	12.873	1.1242	0.94878	NaN	NaN	0.73218	1.1158	NaN	NaN
H7C440	DIS3-like exonuclease 2	DIS3L2	2	2	0	0	2	2	0	0	10.7	4.8733	0.91122	0.50131	NaN	NaN	0.92331	0.5692	NaN	NaN
H7C519	5-nucleotidase domain-containing protein 2	NT5DC2	2	2	0	0	2	2	0	0	10.3	3.3617	1.0404	NaN	NaN	NaN	0.99961	NaN	NaN	NaN
H7C5H5	Mitofusin-1	MFN1	4	0	0	0	4	0	0	0	9.5	4.5769	1.0524	NaN	NaN	NaN	0.80226	NaN	NaN	NaN
V9GZ57	Integrin beta;Integrin beta-5	ITGB5	2	1	0	0	2	1	0	0	9.9	5.3456	1.0695	NaN	NaN	NaN	1.0347	NaN	NaN	NaN
H9KV90		SHANK1	0	1	0	0	0	1	0	0	0.7	-2	NaN	NaN	NaN	NaN	NaN	NaN	NaN	NaN	+
I3L0E3	28S ribosomal protein S17, mitochondrial	hCG_1984214	2	5	0	0	2	5	0	0	43.6	23.46	0.90286	0.97934	NaN	NaN	0.90561	0.956	NaN	NaN
I3L0M7	Segment polarity protein dishevelled homolog DVL-2	DVL2	0	1	0	0	0	1	0	0	7.9	4.797	NaN	NaN	NaN	NaN	NaN	NaN	NaN	NaN
I3L0N3	Vesicle-fusing ATPase	NSF	21	26	0	0	3	1	0	0	43.8	181.75	0.97241	0.96739	NaN	NaN	0.95746	0.87761	NaN	NaN
I3L0U5	Coiled-coil domain-containing protein 137	CCDC137	1	1	1	0	1	1	1	0	9.9	3.5334	NaN	NaN	NaN	NaN	NaN	NaN	NaN	NaN
I3L0X7		ZFP90	1	1	0	0	1	1	0	0	8.8	-2	NaN	NaN	NaN	NaN	NaN	NaN	NaN	NaN	+
I3L1D2	Mannose-P-dolichol utilization defect 1 protein	MPDU1	3	3	1	0	3	3	1	0	62.3	6.9538	1.3928	0.80459	0.9759	NaN	0.86608	1.1579	0.89274	NaN
U3KQN3	Diphthamide biosynthesis protein 1	DPH1	2	1	0	0	2	1	0	0	51.5	13.068	1.2044	NaN	NaN	NaN	1.1944	NaN	NaN	NaN
I3L1P8	Mitochondrial 2-oxoglutarate/malate carrier protein	SLC25A11	6	6	0	0	6	6	0	0	31.1	93.701	1.0101	0.89659	NaN	NaN	0.90636	0.98543	NaN	NaN
I3L1T3	Derlin-2	DERL2	1	1	0	0	1	1	0	0	19	30.127	NaN	NaN	NaN	NaN	NaN	NaN	NaN	NaN
I3L1Y8	NmrA-like family domain-containing protein 1	NMRAL1	2	2	0	0	2	1	0	0	24.2	2.9756	0.65477	0.90624	NaN	NaN	0.78737	0.42158	NaN	NaN
I3L2Y2	Aspartate beta-hydroxylase domain-containing protein 1	ASPHD1	1	0	0	0	1	0	0	0	16	2.3859	1.1279	NaN	NaN	NaN	0.4362	NaN	NaN	NaN
I3L2C7	Gem-associated protein 4	GEMIN4	1	1	0	0	1	1	0	0	1.7	5.2343	NaN	NaN	NaN	NaN	NaN	NaN	NaN	NaN
I3L3E4	Charged multivesicular body protein 6	CHMP6	0	2	0	0	0	2	0	0	23.9	2.4667	NaN	0.55646	NaN	NaN	NaN	0.86559	NaN	NaN
I3L448	ATP synthase mitochondrial F1 complex assembly factor 1	ATPAF1	3	3	0	0	3	3	0	0	8.5	6.1687	1.1726	1.1758	NaN	NaN	1.1745	0.94569	NaN	NaN
I3L4N8		ACTG1	25	31	12	15	1	1	0	0	94.6	2.8879	NaN	NaN	NaN	NaN	NaN	NaN	NaN	NaN
I3VM54	Lysine-specific demethylase 2A	KDM2A	4	3	0	0	4	3	0	0	4.5	7.0627	0.67308	0.91303	NaN	NaN	1.021	0.73604	NaN	NaN
J3KMX1	Nuclear pore complex protein Nup88	NUP88	9	7	0	0	9	7	0	0	17.5	52.949	0.86872	0.97309	NaN	NaN	0.97259	0.83231	NaN	NaN
J3KMZ8	Zinc finger protein ubi-d4	DPF2	2	3	0	0	2	3	0	0	9.9	5.2408	1.5256	0.91386	NaN	NaN	1.1133	0.83207	NaN	NaN
J3KMZ9	Low-density lipoprotein receptor	LDLR	3	3	0	2	3	3	0	2	9.3	12.12	1.1132	1.0304	NaN	0.56538	0.82756	0.55281	NaN	0.92511
J3KN29	26S proteasome non-ATPase regulatory subunit 9	PSMD9	9	9	0	0	9	9	0	0	42.3	146.19	0.97686	0.78383	NaN	NaN	0.89561	0.9502	NaN	NaN
J3KN36	Nodal modulator 2;Nodal modulator 3;Nodal modulator 1	NOMO3	16	8	0	0	15	7	0	0	21.4	44.849	0.98173	0.93809	NaN	NaN	0.93542	0.96136	NaN	NaN
J3KN67		TPM3	20	20	2	2	0	0	0	0	62.5	4.7804	NaN	NaN	NaN	NaN	NaN	NaN	NaN	NaN
J3KNC0	Transcription initiation factor IIA subunit 1;Transcription initiation factor IIA alpha chain;Transcription initiation factor IIA beta chain	GTF2A1	1	1	0	0	1	1	0	0	18.6	3.6086	NaN	NaN	NaN	NaN	NaN	NaN	NaN	NaN
J3KP15	Serine/arginine-rich splicing factor 2	SRSF2	7	8	7	8	6	6	5	6	51.1	297.47	0.99191	1.2019	0.99303	0.87176	1.1241	1.0062	1.0416	0.9448
J3KPD3	RNA-binding protein 7	RBM7	2	2	0	1	2	2	0	1	18.4	16.156	1.0647	1.1004	NaN	0.96001	0.71439	1.1923	NaN	1.423
J3KPH8	Histone deacetylase;Histone deacetylase 7	HDAC7	3	3	1	1	3	3	1	1	6.5	9.1091	0.88874	0.84464	0.87383	NaN	0.88078	1.4131	1.0289	NaN
S4R360	39S ribosomal protein L42, mitochondrial	MRPL42	0	0	0	1	0	0	0	1	11.7	5.5234	NaN	NaN	NaN	NaN	NaN	NaN	NaN	NaN
J3KPP4	Luc7-like protein 3	LUC7L3	7	6	6	8	7	6	6	8	19.6	323.31	1.2296	1.0486	1.3555	0.93543	1.2347	1.2135	1.1612	1.331
J3KPT4	TraB domain-containing protein	TRABD	1	1	0	0	1	1	0	0	7.4	2.4565	NaN	NaN	NaN	NaN	NaN	NaN	NaN	NaN
J3KPX7	Prohibitin-2	PHB2	18	19	0	0	18	19	0	0	73.2	267.55	0.85395	0.98108	NaN	NaN	1.0054	0.89512	NaN	NaN
J3KQ32	Obg-like ATPase 1	OLA1	22	22	1	0	22	22	1	0	65.4	203.86	0.98486	1.0207	NaN	NaN	1.0069	0.94225	NaN	NaN
J3KQ34	COP9 signalosome complex subunit 7b	COPS7B	1	4	0	0	1	4	0	0	29.1	11.153	1.2533	1.0674	NaN	NaN	1.183	1.0719	NaN	NaN
J3KQ48	Peptidyl-tRNA hydrolase 2, mitochondrial	PTRH2	6	7	0	0	6	7	0	0	52.8	35.637	1.903	1.238	NaN	NaN	1.0661	1.6697	NaN	NaN
J3KQ72	F-box only protein 6	FBXO6	2	1	0	0	2	1	0	0	8.4	3.6441	0.84329	NaN	NaN	NaN	0.87145	NaN	NaN	NaN
J3KQJ1	Sulfatase-modifying factor 2	SUMF2	9	9	0	0	9	9	0	0	34.4	55.33	0.83857	0.8397	NaN	NaN	0.78615	0.76015	NaN	NaN
J3KQN4	60S ribosomal protein L36a	RPL36A	9	7	0	0	2	2	0	0	43	39.219	1.0291	0.95098	NaN	NaN	1.0324	0.99769	NaN	NaN
J3KR35	Coiled-coil domain-containing protein 12	CCDC12	2	1	0	0	2	1	0	0	21.2	3.6088	1.0075	NaN	NaN	NaN	0.7523	NaN	NaN	NaN
J3KR44	Ubiquitin thioesterase OTUB1	OTUB1	13	13	0	1	13	13	0	1	63.6	161.41	0.97397	1.0627	NaN	NaN	1.0998	0.96352	NaN	NaN
J3KR72	Transcription initiation factor TFIID subunit 6	TAF6	0	1	0	0	0	1	0	0	1.6	2.2856	NaN	NaN	NaN	NaN	NaN	NaN	NaN	NaN
J3KS15	Peptidyl-tRNA hydrolase ICT1, mitochondrial	ICT1	1	1	0	0	1	1	0	0	7.3	4.2592	NaN	NaN	NaN	NaN	NaN	NaN	NaN	NaN
J3KS22	L-xylulose reductase	DCXR	3	3	0	0	3	3	0	0	17.9	7.0937	1.4357	1.4943	NaN	NaN	1.0584	1.0732	NaN	NaN
J3KT04		EIF4A1	5	4	3	3	1	1	0	0	88.2	5.2477	NaN	NaN	NaN	NaN	NaN	0.82847	NaN	NaN
J3KT86	Aurora kinase B	AURKB	0	1	0	0	0	1	0	0	5.4	2.345	NaN	NaN	NaN	NaN	NaN	NaN	NaN	NaN
J3KTE1	Phospholipase ABHD3	ABHD3	2	0	0	0	2	0	0	0	10.1	3.7394	0.26926	NaN	NaN	NaN	0.49234	NaN	NaN	NaN
J3QR09	Ribosomal protein L19;60S ribosomal protein L19	RPL19	10	11	1	1	10	11	1	1	43.5	144.94	1.2016	1.0132	1.3288	1.1453	1.1049	1.1229	1.0736	1.3875
J3KTF8	Rho GDP-dissociation inhibitor 1	ARHGDIA	10	9	0	0	10	9	0	0	49.2	232	1.1793	1.058	NaN	NaN	1.0964	1.1787	NaN	NaN
J3KTL2	Serine/arginine-rich splicing factor 1	SRSF1	20	21	11	11	20	21	11	11	54.2	220.95	0.92633	1.1024	0.98808	1.1618	1.064	0.91559	1.0685	0.93441
J3QL48	Proteasome subunit beta type-10	PSMB10	0	1	0	0	0	1	0	0	26	4.4441	NaN	1.0209	NaN	NaN	NaN	1.4737	NaN	NaN
J3QL56	Protein SCO1 homolog, mitochondrial	SCO1	4	2	0	0	4	2	0	0	16.3	14.636	0.98279	1.1682	NaN	NaN	1.1251	1.1599	NaN	NaN
J3QLE5	Small nuclear ribonucleoprotein-associated protein N	SNRPN	9	7	2	2	1	0	0	0	58	2.6491	NaN	NaN	NaN	NaN	NaN	NaN	NaN	NaN
X6R3T8	SAP30-binding protein	SAP30BP	1	2	0	0	1	2	0	0	14.5	6.9108	NaN	1.132	NaN	NaN	NaN	1.0914	NaN	NaN
J3QLI9	Small nuclear ribonucleoprotein Sm D1	SNRPD1	3	3	0	1	3	3	0	1	44	51.398	1.0194	1.0922	NaN	0.71602	1.0316	0.94005	NaN	0.68947
J3QLR8	28S ribosomal protein S23, mitochondrial	MRPS23	3	2	0	0	3	2	0	0	20.4	10.482	0.98331	0.9489	NaN	NaN	1.1067	0.95571	NaN	NaN
J3QLS3	28S ribosomal protein S7, mitochondrial	MRPS7	7	5	0	0	7	5	0	0	26.9	13.814	1.04	1.306	NaN	NaN	0.99899	1.0443	NaN	NaN
J3QQW9	Polycomb protein SUZ12	SUZ12	1	2	0	0	1	2	0	0	3.1	4.3733	NaN	0.97049	NaN	NaN	NaN	0.76561	NaN	NaN
J3QQY2	Transmembrane and coiled-coil domain-containing protein 1	TMCO1	3	3	0	0	3	3	0	0	35.6	32.926	0.93165	1.0428	NaN	NaN	0.96376	0.90115	NaN	NaN
J3QQZ9	Pyridoxine-5-phosphate oxidase	PNPO	4	5	0	0	4	5	0	0	29.8	12.05	1.0284	0.94094	NaN	NaN	0.7496	0.7647	NaN	NaN
J3QR07	YTH domain-containing protein 1	YTHDC1	2	2	1	1	2	2	1	1	7.9	135.6	1.1976	0.8828	NaN	NaN	0.89357	0.95946	NaN	NaN
J3QRG6	Cyclin-dependent kinase inhibitor 2A	CDKN2A	7	7	2	2	7	7	2	2	79	132.21	1.0728	0.9701	2.5453	1.5299	1.0171	1.1324	1.0994	2.7505
J3QRM9	ORM1-like protein 3	ORMDL3	1	1	0	0	1	1	0	0	11.6	3.9639	NaN	0.77089	NaN	NaN	NaN	0.87251	NaN	NaN
J3QRS3	Myosin regulatory light chain 12A;Myosin regulatory light chain 12B;Myosin regulatory light polypeptide 9	MYL12A	9	9	0	0	9	9	0	0	49.2	323.31	1.0498	1.0516	NaN	NaN	0.98517	1.0165	NaN	NaN
J3QRS9	BUB3-interacting and GLEBS motif-containing protein ZNF207	ZNF207	6	6	1	2	6	6	1	2	15	34.842	0.98642	1.1658	1.0798	1.1827	1.2075	1.0338	1.1104	0.94105
J3QRU1	Non-specific protein-tyrosine kinase;Tyrosine-protein kinase Yes	YES1	5	7	0	0	4	4	0	0	15.3	12.163	0.98762	1.0098	NaN	NaN	1.0298	1.0144	NaN	NaN
J3QRV5	Lethal(2) giant larvae protein homolog 2	LLGL2	0	2	0	0	0	2	0	0	5.1	6.9365	NaN	NaN	NaN	NaN	NaN	NaN	NaN	NaN
J3QT61	GTPase Era, mitochondrial	ERAL1	0	1	0	0	0	1	0	0	18.7	2.1768	NaN	NaN	NaN	NaN	NaN	NaN	NaN	NaN
J3QT28	Mitotic checkpoint protein BUB3	BUB3	14	14	0	0	14	14	0	0	73.4	323.31	1.0164	1.2372	NaN	NaN	1.1365	0.95772	NaN	NaN
J3QTA2	BAG family molecular chaperone regulator 1	BAG1	6	5	0	0	6	5	0	0	24.1	29.698	0.96554	1.0914	NaN	NaN	1.1015	1.1037	NaN	NaN
K4DI83	Transmembrane protein 8A	TMEM8A	1	0	0	0	1	0	0	0	2.8	2.1608	NaN	NaN	NaN	NaN	NaN	NaN	NaN	NaN
K4DI92	RWD domain-containing protein 4	RWDD4	2	3	0	0	2	3	0	0	23	7.2932	1.1237	1.016	NaN	NaN	1.3145	1.0543	NaN	NaN
K4DI93	Cullin-4B	CUL4B	12	7	0	0	7	2	0	0	18.8	22.134	0.95901	1.1139	NaN	NaN	1.0046	2.1252	NaN	NaN
K7EM02	Katanin p60 ATPase-containing subunit A-like 2	KATNAL2	1	1	0	0	1	1	0	0	9.4	6.3452	0.96297	0.97802	NaN	NaN	0.89987	0.93742	NaN	NaN
K7EIK7	Echinoderm microtubule-associated protein-like 2	EML2	10	9	0	0	10	9	0	0	20.7	28.994	0.8488	0.95324	NaN	NaN	0.9675	0.77033	NaN	NaN
K7EIM2	Ribosomal protein S6 kinase beta-1	RPS6KB1	2	1	0	0	2	1	0	0	38.7	3.2868	0.91298	NaN	NaN	NaN	0.7171	NaN	NaN	NaN
K7EIW8		SREBF1	0	0	0	1	0	0	0	1	16	-2	NaN	NaN	NaN	NaN	NaN	NaN	NaN	NaN	+
K7EKW7	HEAT repeat-containing protein 6	HEATR6	1	1	0	0	1	1	0	0	13.2	4.8116	NaN	NaN	NaN	NaN	NaN	NaN	NaN	NaN
K7EIY6	E3 ubiquitin-protein ligase RNF126	RNF126	1	4	0	0	1	4	0	0	24	7.1815	NaN	0.47057	NaN	NaN	NaN	0.85141	NaN	NaN
K7EK72	HAUS augmin-like complex subunit 1	HAUS1	1	1	0	0	1	1	0	0	21.1	3.6002	NaN	NaN	NaN	NaN	NaN	NaN	NaN	NaN
K7EJC8	Golgi SNAP receptor complex member 1	GOSR1	2	2	0	0	2	2	0	0	18.2	2.9593	1.3387	NaN	NaN	NaN	1.0121	NaN	NaN	NaN
K7EJH0		SPC24	3	4	0	0	1	1	0	0	39.9	9.3943	0.51397	0.65679	NaN	NaN	0.9203	0.60114	NaN	NaN
K7EJU9	Bifunctional arginine demethylase and lysyl-hydroxylase JMJD6	JMJD6	5	3	0	0	5	3	0	0	18.2	8.2566	1.0193	1.0897	NaN	NaN	1.0998	0.92755	NaN	NaN
K7EK07	Histone H3;Histone H3.3;Histone H3.3C	H3F3B	12	12	2	2	1	1	0	0	62.9	38.118	NaN	NaN	NaN	NaN	NaN	NaN	NaN	NaN
K7EQ55	DAZ-associated protein 1	DAZAP1	7	7	6	8	7	7	6	8	36.7	73.032	0.98043	0.91645	0.99302	0.82268	0.87709	1.0743	0.85269	0.99036
K7EK35	Signal transducer and activator of transcription;Signal transducer and activator of transcription 5A	STAT5A	4	4	0	0	0	1	0	0	7.3	3.0953	NaN	NaN	NaN	NaN	NaN	NaN	NaN	NaN
K7EK56	UPF0449 protein C19orf25	C19orf25	2	2	0	0	2	2	0	0	26.2	7.6799	1.1003	0.93202	NaN	NaN	0.91399	0.95521	NaN	NaN
K7EK91	Dynein heavy chain 17, axonemal	DNAH17	3	0	0	0	3	0	0	0	1.4	2.0452	NaN	NaN	NaN	NaN	NaN	NaN	NaN	NaN
K7EKE6	Lon protease homolog, mitochondrial	LONP1	25	24	1	2	25	24	1	2	43.9	275.7	1.0921	1.0685	NaN	1.5413	0.99661	0.98279	NaN	1.204
K7EKE8	Nectin-2	PVRL2	2	1	0	0	2	1	0	0	14.8	15.656	0.97805	NaN	NaN	NaN	0.92293	NaN	NaN	NaN
K7EKI8	Periplakin	PPL	11	11	0	0	10	11	0	0	10.9	47.254	0.47855	0.95861	NaN	NaN	1.0632	0.55636	NaN	NaN
K7ELG9	Protein LSM12 homolog	LSM12	1	2	0	0	1	2	0	0	9.6	4.4987	0.92988	0.89766	NaN	NaN	1.3321	1.0032	NaN	NaN
K7ELL7	Glucosidase 2 subunit beta	PRKCSH	19	18	2	4	19	18	2	4	51.4	323.31	0.95084	1.05	2.6124	1.0885	0.96829	0.98342	0.92404	2.9196
K7EM09	Transmembrane protein 205	TMEM205	2	2	0	0	2	2	0	0	25	22.985	1.007	0.86007	NaN	NaN	0.82163	1.4444	NaN	NaN
K7ELS0	Uncharacterized protein C19orf43	C19orf43	1	2	0	0	1	2	0	0	28.8	2.5584	NaN	0.79318	NaN	NaN	NaN	0.90134	NaN	NaN
K7EM18	Eukaryotic translation initiation factor 1;Eukaryotic translation initiation factor 1b	EIF1	10	10	1	0	10	10	1	0	76	323.31	0.83924	0.84044	NaN	NaN	0.86879	0.8343	NaN	NaN
K7ENI6	Transmembrane protein 256	TMEM256	1	1	0	0	1	1	0	0	68.3	31.005	1.4074	1.5263	NaN	NaN	1.3365	1.1201	NaN	NaN
K7EQ03	RNA-binding protein 42	RBM42	4	4	0	0	4	4	0	0	18.8	37.656	0.77945	0.84513	NaN	NaN	0.92408	0.88498	NaN	NaN
K7EQE7	Transmembrane protein 161A	TMEM161A	2	2	0	0	2	2	0	0	17.2	4.9695	1.0915	1.145	NaN	NaN	0.9114	0.96106	NaN	NaN
K7EPB5	ELAV-like protein 3	ELAVL3	1	0	1	1	1	0	1	1	19.6	15.298	NaN	NaN	NaN	0.68642	NaN	NaN	NaN	0.23001
K7EPV0	Cytochrome c oxidase assembly factor 3 homolog, mitochondrial	COA3	5	4	0	0	5	4	0	0	59.2	12.645	1.2011	1.1911	NaN	NaN	0.97514	0.71522	NaN	NaN
K7EQG9	Tyrosine-protein phosphatase non-receptor type;Protein-tyrosine-phosphatase;Tyrosine-protein phosphatase non-receptor type 2	PTPN2	0	1	0	1	0	1	0	1	10.9	4.3851	NaN	NaN	NaN	NaN	NaN	NaN	NaN	NaN
K7ER15	Haloacid dehalogenase-like hydrolase domain-containing protein 2	HDHD2	2	2	0	0	2	2	0	0	10.3	3.142	0.72506	0.68168	NaN	NaN	0.58505	0.92019	NaN	NaN
K7ERF1	Eukaryotic translation initiation factor 3 subunit K	EIF3K	7	7	0	0	7	7	0	0	37	23.25	0.97239	0.91987	NaN	NaN	1.0353	0.8821	NaN	NaN
K7ERV3	Thymidine kinase;Thymidine kinase, cytosolic	TK1	2	0	0	0	2	0	0	0	12.4	2.7812	0.90259	NaN	NaN	NaN	1.115	NaN	NaN	NaN
K7ES61	39S ribosomal protein L4, mitochondrial	MRPL4	6	5	1	1	6	5	1	1	39	27.985	0.99832	0.99326	NaN	NaN	0.92791	0.93277	NaN	NaN
K7ESF4			5	4	0	0	0	0	0	0	33.5	2.1654	NaN	NaN	NaN	NaN	NaN	NaN	NaN	NaN
K7ESN3	GH3 domain-containing protein	GHDC	1	0	0	0	1	0	0	0	3.1	3.3372	NaN	NaN	NaN	NaN	NaN	NaN	NaN	NaN
L0R6Q1		SLC35A4	2	2	0	0	2	2	0	0	17.5	6.1206	1.0002	0.96124	NaN	NaN	0.99111	1.0017	NaN	NaN
L0R819		ASNSD1	0	2	0	0	0	2	0	0	25	4.3436	NaN	0.97372	NaN	NaN	NaN	2.1781	NaN	NaN
M0QWZ7	Serine--tRNA ligase, mitochondrial	SARS2	5	4	0	0	5	4	0	0	14.9	26.169	0.87011	0.95329	NaN	NaN	1.0854	0.80918	NaN	NaN
M0R1N9	NAD-dependent protein deacetylase sirtuin-6	SIRT6	1	1	0	0	1	1	0	0	13.1	5.1888	NaN	NaN	NaN	NaN	NaN	NaN	NaN	NaN
M0QXB4	Coatomer subunit epsilon	COPE	16	17	0	0	16	17	0	0	63.7	323.31	1.0137	0.93331	NaN	NaN	0.94547	0.99433	NaN	NaN
M0QXF5			0	1	0	0	0	1	0	0	20	2.1904	NaN	NaN	NaN	NaN	NaN	NaN	NaN	NaN
M0QXZ5	Zinc finger protein 428	ZNF428	3	2	0	0	3	2	0	0	20.6	17.877	1.2103	1.2725	NaN	NaN	0.9156	1.2944	NaN	NaN
M0QY97	Zinc finger CCCH domain-containing protein 4	ZC3H4	5	3	1	4	5	3	1	4	14.6	22.051	1.0216	1.1881	NaN	1.0481	1.0393	0.96254	NaN	0.90881
M0QYT0			17	16	9	9	0	0	0	0	69.5	123.8	1.0278	0.91781	NaN	NaN	0.92155	1.0276	NaN	NaN
M0QYT5	Vesicle transport protein USE1	USE1	2	2	0	0	2	2	0	0	16.8	9.6852	1.1314	0.98198	NaN	NaN	1.0609	1.204	NaN	NaN
M0R0N4	AP-2 complex subunit sigma	AP2S1	2	2	0	0	2	2	0	0	11.1	3.4307	NaN	NaN	NaN	NaN	NaN	NaN	NaN	NaN
M0QZM1		HNRNPM	27	27	30	29	1	1	1	1	85.9	23.846	NaN	NaN	1.0981	1.4184	NaN	NaN	1.1798	1.1807
M0QZR4	Rho guanine nucleotide exchange factor 1	ARHGEF1	12	10	0	0	12	10	0	0	16.9	42.93	0.84189	0.80745	NaN	NaN	0.83437	0.90643	NaN	NaN
M0QZX5		ILVBL	3	3	0	0	1	1	0	0	21.4	-2	NaN	NaN	NaN	NaN	NaN	NaN	NaN	NaN	+
M0R0D7	Kallikrein-15	KLK15	0	1	0	0	0	1	0	0	7.5	-2	NaN	NaN	NaN	NaN	NaN	NaN	NaN	NaN	+
M0R0F0	40S ribosomal protein S5;40S ribosomal protein S5, N-terminally processed	RPS5	17	16	5	4	17	16	5	4	59	323.31	0.96869	0.97455	1.7792	1.1739	1.0166	0.99316	0.7698	1.1937
M0R3F4	BRISC and BRCA1-A complex member 1	BABAM1	3	3	0	0	3	3	0	0	36.5	25.963	0.80205	0.92599	NaN	NaN	0.84029	0.80222	NaN	NaN
M0R117	60S ribosomal protein L18a	RPL18A	10	7	4	5	10	7	4	5	68.2	118.57	1.0104	1.0095	1.2268	1.1798	0.98186	1.0699	0.93733	1.0663
M0R165	Epidermal growth factor receptor substrate 15-like 1	EPS15L1	5	5	1	0	5	5	1	0	20	88.333	1.0533	0.92639	NaN	NaN	1.1242	1.125	NaN	NaN
M0R1B0	ER membrane protein complex subunit 8	EMC8	3	3	0	0	3	3	0	0	35	9.5819	0.89472	1.2655	NaN	NaN	1.0596	0.98535	NaN	NaN
M0R1I2	Urokinase plasminogen activator surface receptor	PLAUR	0	1	1	4	0	1	1	4	19.2	8.7336	NaN	NaN	0.89659	1.1035	NaN	NaN	0.87018	1.2099
M0R226	Ribosomal protein L34;39S ribosomal protein L34, mitochondrial	MRPL34	2	1	0	0	2	1	0	0	12	2.128	1.3394	NaN	NaN	NaN	0.97863	NaN	NaN	NaN
M0R2A0	ER membrane protein complex subunit 10	EMC10	1	2	0	0	1	2	0	0	7.3	19.283	0.92382	NaN	NaN	NaN	0.87453	NaN	NaN	NaN
M0R2Z9	SURP and G-patch domain-containing protein 2	SUGP2	7	8	1	4	7	8	1	4	15.1	19.789	1.694	0.8374	1.8725	0.88807	0.87594	1.3127	0.91875	2.0532
M0R3D4	Prenylated Rab acceptor protein 1	RABAC1	2	2	0	0	2	2	0	0	19.2	6.897	0.77046	0.77524	NaN	NaN	1.4448	0.82148	NaN	NaN
O00115	Deoxyribonuclease-2-alpha	DNASE2	1	1	0	0	1	1	0	0	3.6	4.1186	NaN	NaN	NaN	NaN	NaN	NaN	NaN	NaN
O00116	Alkyldihydroxyacetonephosphate synthase, peroxisomal	AGPS	17	18	0	0	17	18	0	0	40	83.237	1.0568	1.0475	NaN	NaN	0.99705	1.1125	NaN	NaN
O00139	Kinesin-like protein KIF2A	KIF2A	4	5	0	0	4	5	0	0	9.8	11.654	0.94077	0.89578	NaN	NaN	1.0051	0.84446	NaN	NaN
O00148	ATP-dependent RNA helicase DDX39A	DDX39A	25	26	5	4	10	10	0	0	65.1	323.31	1.1373	0.97761	NaN	NaN	1.025	1.0439	NaN	NaN
O00151	PDZ and LIM domain protein 1	PDLIM1	12	12	0	0	12	12	0	0	66.9	119.81	1.1446	0.9782	NaN	NaN	0.96111	1.0561	NaN	NaN
O00154	Cytosolic acyl coenzyme A thioester hydrolase	ACOT7	11	10	0	0	11	10	0	0	41.4	125.53	0.98315	1.0099	NaN	NaN	0.9651	0.97536	NaN	NaN
O00159	Unconventional myosin-Ic	MYO1C	26	23	1	0	26	23	1	0	39.2	141.85	0.98411	0.96744	NaN	NaN	0.99567	1.0946	NaN	NaN
O00161	Synaptosomal-associated protein 23;Synaptosomal-associated protein	SNAP23	6	7	0	0	6	7	0	0	51.2	45.185	1.0173	0.94484	NaN	NaN	0.90067	0.95643	NaN	NaN
O00165	HCLS1-associated protein X-1	HAX1	2	4	0	0	2	4	0	0	24.2	17.557	1.0294	0.88448	NaN	NaN	0.90878	1.0293	NaN	NaN
O00170	AH receptor-interacting protein	AIP	7	6	0	0	7	6	0	0	43	24.683	1.0545	1.1363	NaN	NaN	0.95022	1.0493	NaN	NaN
O00178	GTP-binding protein 1	GTPBP1	2	3	0	0	2	3	0	0	6.9	8.2759	0.91192	0.99969	NaN	NaN	1.0843	0.87842	NaN	NaN
O00186	Syntaxin-binding protein 3	STXBP3	9	9	0	0	9	9	0	0	21.8	25.184	1.0034	0.97059	NaN	NaN	0.9999	1.0037	NaN	NaN
O00194	Ras-related protein Rab-27B	RAB27B	1	1	0	0	1	1	0	0	5.5	2.3994	NaN	NaN	NaN	NaN	NaN	NaN	NaN	NaN
O00203	AP-3 complex subunit beta-1	AP3B1	8	7	0	0	7	6	0	0	9.3	24.75	0.88844	1.0081	NaN	NaN	1.0387	0.79222	NaN	NaN
O00231	26S proteasome non-ATPase regulatory subunit 11	PSMD11	19	18	0	0	19	18	0	0	51.4	141.29	0.95632	0.97598	NaN	NaN	0.95013	0.94583	NaN	NaN
O00232	26S proteasome non-ATPase regulatory subunit 12	PSMD12	19	19	0	1	19	19	0	1	52.4	109.74	1.0001	1.01	NaN	NaN	0.9766	1.0868	NaN	NaN
O00264	Membrane-associated progesterone receptor component 1	PGRMC1	15	14	1	2	14	13	1	2	63.6	323.31	1.1185	0.97556	NaN	1.4727	0.96255	1.0086	NaN	2.4385
O00267	Transcription elongation factor SPT5	SUPT5H	11	9	1	1	11	9	1	1	16.5	67.386	0.95352	0.96659	1.316	NaN	0.94617	0.83124	1.3149	NaN
O00268	Transcription initiation factor TFIID subunit 4	TAF4	1	2	0	0	1	2	0	0	4.3	7.0725	NaN	1.1007	NaN	NaN	NaN	0.81921	NaN	NaN
O00273	DNA fragmentation factor subunit alpha	DFFA	9	9	0	1	1	1	0	0	35	3.6648	0.682	0.80535	NaN	NaN	0.63468	0.62209	NaN	NaN
O00273	DNA fragmentation factor subunit alpha	DFFA	9	9	0	1	1	1	0	0	46.6	47.005	1.0628	0.95641	NaN	NaN	0.93934	1.133	NaN	NaN
O00291	Huntingtin-interacting protein 1	HIP1	3	2	0	0	3	2	0	0	7.6	7.3146	0.6618	0.80511	NaN	NaN	0.70046	0.58152	NaN	NaN
O00299	Chloride intracellular channel protein 1	CLIC1	17	17	2	6	17	17	2	6	76.8	323.31	0.9989	0.9663	2.6742	1.0561	1.0381	1.0172	0.98302	2.1619
O00303	Eukaryotic translation initiation factor 3 subunit F	EIF3F	14	15	0	1	14	15	0	1	52.1	226.58	0.95176	1.0209	NaN	2.2667	0.99529	0.94155	NaN	2.4281
O00399	Dynactin subunit 6	DCTN6	1	1	0	0	1	1	0	0	9.5	7.3423	NaN	NaN	NaN	NaN	NaN	NaN	NaN	NaN
O00401	Neural Wiskott-Aldrich syndrome protein	WASL	3	3	0	0	3	3	0	0	14.5	7.0229	1.0101	0.93646	NaN	NaN	1.4072	1.0895	NaN	NaN
O00410	Importin-5	IPO5	44	46	4	9	42	44	4	9	69.9	323.31	0.86733	0.99729	3.5271	1.0141	1.0124	0.85089	1.1069	3.3192
O00422	Histone deacetylase complex subunit SAP18	SAP18	5	8	1	1	5	8	1	1	47.1	143.31	1.0981	1.2632	NaN	NaN	1.187	1.0748	NaN	NaN
O00425	Insulin-like growth factor 2 mRNA-binding protein 3	IGF2BP3	15	14	0	2	13	12	0	1	36.4	109.71	0.76089	0.74911	NaN	NaN	0.87376	0.73217	NaN	NaN
O00429	Dynamin-1-like protein	DNM1L	20	20	0	0	1	1	0	0	47.2	251.37	1.1313	1.0507	NaN	NaN	0.96882	1.0632	NaN	NaN
O00429	Dynamin-1-like protein	DNM1L	20	20	0	0	1	1	0	0	48.1	6.9295	NaN	NaN	NaN	NaN	NaN	NaN	NaN	NaN
O00442	RNA 3-terminal phosphate cyclase	RTCA	6	5	0	0	6	5	0	0	31.7	34.553	0.83213	0.9332	NaN	NaN	0.92059	1.0234	NaN	NaN
O00443	Phosphatidylinositol 4-phosphate 3-kinase C2 domain-containing subunit alpha	PIK3C2A	8	10	0	0	8	10	0	0	10.7	40.037	0.97455	0.94985	NaN	NaN	0.9842	0.84092	NaN	NaN
O00461	Golgi integral membrane protein 4	GOLIM4	7	5	0	0	7	5	0	0	14.2	78.204	0.87161	1.1522	NaN	NaN	1.0775	0.7992	NaN	NaN
O00483	Cytochrome c oxidase subunit NDUFA4	NDUFA4	3	3	0	0	3	3	0	0	32.1	10.326	1.0494	1.0583	NaN	NaN	0.97044	0.96699	NaN	NaN
O00487	26S proteasome non-ATPase regulatory subunit 14	PSMD14	9	7	0	0	9	7	0	0	62.6	78.994	1.0775	0.97129	NaN	NaN	1.0682	0.94693	NaN	NaN
O00499	Myc box-dependent-interacting protein 1	BIN1	6	5	1	1	5	4	1	1	17.8	37.388	1.0168	0.97253	0.93788	0.83323	0.89986	0.96585	1.0086	0.96104
O00505	Importin subunit alpha-4	KPNA3	8	7	0	2	4	3	0	2	29.9	22.685	1.0676	1.0499	NaN	0.7102	1.0666	1.0112	NaN	2.2315
O00560	Syntenin-1	SDCBP	12	12	0	0	1	1	0	0	68.8	158.5	1.0124	0.89735	NaN	NaN	0.95448	0.97878	NaN	NaN
O00560	Syntenin-1	SDCBP	12	12	0	0	1	1	0	0	68.7	2.8874	NaN	NaN	NaN	NaN	NaN	NaN	NaN	NaN
O00566	U3 small nucleolar ribonucleoprotein protein MPP10	MPHOSPH10	7	4	0	2	7	4	0	2	17.2	42.991	0.99582	0.97548	NaN	0.95223	1.0313	0.93969	NaN	0.71755
O00567	Nucleolar protein 56	NOP56	17	17	2	3	17	17	2	3	38.2	86.594	1.0591	1.0092	1.1573	1.111	0.96208	1.1425	1.0975	1.0344
O00592	Podocalyxin	PODXL	10	8	6	7	10	8	6	7	24.3	131.17	1.3313	1.0719	1.2307	0.72204	1.0948	1.3368	0.93375	1.2672
O00622	Protein CYR61	CYR61	5	4	0	0	5	4	0	0	15.5	8.7589	0.86555	0.86751	NaN	NaN	0.88984	0.79932	NaN	NaN
O00625	Pirin	PIR	10	8	1	1	10	8	1	1	58.3	191.52	0.91677	0.90056	NaN	NaN	0.87701	0.94106	NaN	NaN
O00629	Importin subunit alpha-3	KPNA4	9	10	1	2	5	6	1	2	34.5	103.48	0.97505	0.98422	NaN	0.18148	0.95078	1.0192	NaN	0.78668
O00743	Serine/threonine-protein phosphatase 6 catalytic subunit;Serine/threonine-protein phosphatase 6 catalytic subunit, N-terminally processed	PPP6C	6	4	0	0	6	4	0	0	33.9	10.846	1.1708	1.0631	NaN	NaN	1.0645	0.8	NaN	NaN
O00762	Ubiquitin-conjugating enzyme E2 C	UBE2C	5	2	0	0	5	2	0	0	42.5	11.475	0.95718	0.74427	NaN	NaN	0.93322	0.8117	NaN	NaN
O00764	Pyridoxal kinase	PDXK	15	16	1	3	15	16	1	3	68.3	323.31	0.83772	0.81252	NaN	0.89202	0.91552	0.84435	NaN	2.5998
O00767	Acyl-CoA desaturase	SCD	2	3	0	0	2	3	0	0	19.8	17.351	1.1369	0.96836	NaN	NaN	0.75277	1.4829	NaN	NaN
O14530	Thioredoxin domain-containing protein 9	TXNDC9	2	3	0	0	2	3	0	0	14.4	5.9973	1.024	0.93116	NaN	NaN	1.003	1.0574	NaN	NaN
O14545	TRAF-type zinc finger domain-containing protein 1	TRAFD1	7	7	1	2	7	7	1	2	19.2	23.52	1.1106	0.92457	NaN	0.84983	0.96794	0.92323	NaN	2.7978
O14556	Glyceraldehyde-3-phosphate dehydrogenase, testis-specific	GAPDHS	1	2	1	1	0	1	0	0	5.1	2.0882	NaN	NaN	NaN	NaN	NaN	NaN	NaN	NaN
O14561	Acyl carrier protein, mitochondrial;Acyl carrier protein	NDUFAB1	6	4	0	0	6	4	0	0	23.7	19.795	0.96058	1.1494	NaN	NaN	1.1136	1.1013	NaN	NaN
O14617	AP-3 complex subunit delta-1	AP3D1	5	5	0	0	5	5	0	0	10.2	22.537	0.78554	0.98966	NaN	NaN	0.98133	0.76876	NaN	NaN
O14646	Chromodomain-helicase-DNA-binding protein 1	CHD1	3	3	1	1	3	3	1	1	4	6.1969	0.87667	1.0708	NaN	0.931	1.0674	0.94649	NaN	0.81879
O14656	Torsin-1A	TOR1A	1	1	0	0	1	1	0	0	6.9	2.2683	NaN	NaN	NaN	NaN	NaN	NaN	NaN	NaN
O14684	Prostaglandin E synthase	PTGES	4	4	0	0	4	4	0	0	28.3	111.56	1.2726	1.0304	NaN	NaN	1.0066	1.269	NaN	NaN
O14732	Inositol monophosphatase 2	IMPA2	3	4	0	0	3	4	0	0	20.3	149.27	0.92295	1.056	NaN	NaN	0.80401	0.95664	NaN	NaN
O14733	Dual specificity mitogen-activated protein kinase kinase 7	MAP2K7	1	1	0	0	1	1	0	0	6.2	2.6644	NaN	NaN	NaN	NaN	NaN	NaN	NaN	NaN
O14737	Programmed cell death protein 5	PDCD5	9	9	0	0	9	9	0	0	56.8	282.76	0.98719	0.98302	NaN	NaN	0.98978	1.0218	NaN	NaN
O14744	Protein arginine N-methyltransferase 5;Protein arginine N-methyltransferase 5, N-terminally processed	PRMT5	19	19	0	0	19	19	0	0	34.1	141.07	0.98444	1.0043	NaN	NaN	1.0407	1.0151	NaN	NaN
O14745	Na(+)/H(+) exchange regulatory cofactor NHE-RF1	SLC9A3R1	9	10	0	0	9	10	0	0	44.1	98.712	0.97353	0.90053	NaN	NaN	0.90383	0.98395	NaN	NaN
O14763	Tumor necrosis factor receptor superfamily member 10B	TNFRSF10B	1	1	0	0	1	1	0	0	4.1	24.135	0.73003	0.97901	NaN	NaN	0.96125	0.92962	NaN	NaN
O14776	Transcription elongation regulator 1	TCERG1	23	19	0	0	23	19	0	0	23.6	78.349	0.90482	1.0921	NaN	NaN	1.0235	0.85229	NaN	NaN
O14777	Kinetochore protein NDC80 homolog	NDC80	1	3	0	0	1	3	0	0	7.8	3.52	NaN	NaN	NaN	NaN	NaN	NaN	NaN	NaN
O14787	Transportin-2	TNPO2	7	7	0	1	0	1	0	0	13.6	2.3181	NaN	NaN	NaN	NaN	NaN	NaN	NaN	NaN
O14802	DNA-directed RNA polymerase III subunit RPC1;DNA-directed RNA polymerase	POLR3A	1	1	1	0	1	1	1	0	4	2.3514	NaN	NaN	NaN	NaN	NaN	NaN	NaN	NaN
O14818	Proteasome subunit alpha type-7	PSMA7	15	15	0	0	15	15	0	0	54	225.83	0.98	1.0254	NaN	NaN	0.99707	0.98221	NaN	NaN
O14828	Secretory carrier-associated membrane protein 3	SCAMP3	10	9	0	0	10	9	0	0	34.6	323.31	1.0427	0.68451	NaN	NaN	0.72181	1.0647	NaN	NaN
Q5VV89	Microsomal glutathione S-transferase 3	MGST3	6	5	0	0	6	5	0	0	47.6	203.61	1.0208	1.178	NaN	NaN	0.92844	0.9795	NaN	NaN
O14907	Tax1-binding protein 3	TAX1BP3	2	2	0	0	2	2	0	0	28.2	31.221	0.92091	1.0201	NaN	NaN	1.0252	1.0041	NaN	NaN
O14908	PDZ domain-containing protein GIPC1	GIPC1	7	8	0	0	7	7	0	0	27	52.888	1.0336	1.0982	NaN	NaN	1.0439	0.94014	NaN	NaN
O14925	Mitochondrial import inner membrane translocase subunit Tim23;Putative mitochondrial import inner membrane translocase subunit Tim23B	TIMM23	2	1	0	0	2	1	0	0	10	2.061	0.37165	NaN	NaN	NaN	0.38239	NaN	NaN	NaN
O14929	Histone acetyltransferase type B catalytic subunit	HAT1	12	12	0	0	12	12	0	0	45.8	219.02	0.94859	1.042	NaN	NaN	1.0246	0.90025	NaN	NaN
O14949	Cytochrome b-c1 complex subunit 8	UQCRQ	3	3	0	0	3	3	0	0	32.9	13.405	1.1869	1.3981	NaN	NaN	0.99443	1.0195	NaN	NaN
O14964	Hepatocyte growth factor-regulated tyrosine kinase substrate	HGS	6	9	0	0	6	9	0	0	18.5	119.63	1.2247	0.95964	NaN	NaN	0.98206	1.0559	NaN	NaN
O14965	Aurora kinase A	AURKA	5	7	0	0	5	7	0	0	31.8	17.501	0.74994	1.1063	NaN	NaN	1.0475	0.88322	NaN	NaN
O14967	Calmegin	CLGN	5	5	0	0	4	4	0	0	20.7	15.233	0.52604	0.75955	NaN	NaN	0.72746	0.76757	NaN	NaN
O14974	Protein phosphatase 1 regulatory subunit 12A	PPP1R12A	11	9	0	0	11	9	0	0	14.2	107.5	1.0745	1.0542	NaN	NaN	0.98235	0.9607	NaN	NaN
O14975	Very long-chain acyl-CoA synthetase	SLC27A2	9	9	0	0	9	9	0	0	20.6	29.96	1.0781	1.1676	NaN	NaN	1.0736	0.97893	NaN	NaN
O14976	Cyclin-G-associated kinase	GAK	8	7	0	0	8	7	0	0	14.9	61.541	0.47695	0.89089	NaN	NaN	0.78199	0.71479	NaN	NaN
O14979	Heterogeneous nuclear ribonucleoprotein D-like	HNRNPDL	17	16	13	14	15	14	12	13	67.6	252.18	1.2367	1.1049	1.3041	1.1153	1.123	1.2774	1.068	1.3038
O14980	Exportin-1	XPO1	29	31	0	2	29	31	0	2	37.7	214.81	0.97639	1.0329	NaN	0.96744	0.99959	0.94337	NaN	1.7402
O15031	Plexin-B2	PLXNB2	11	12	0	0	11	12	0	0	13.4	46.767	0.7922	0.74648	NaN	NaN	0.84495	0.81533	NaN	NaN
O15042	U2 snRNP-associated SURP motif-containing protein	U2SURP	12	11	8	12	12	11	8	12	23.2	45.459	0.98851	0.92146	0.84385	0.72994	1.0005	0.96884	0.98986	0.98522
O15067	Phosphoribosylformylglycinamidine synthase	PFAS	32	32	0	0	32	32	0	0	42.6	323.31	0.94058	1.0784	NaN	NaN	1.0235	0.97194	NaN	NaN
O15084	Serine/threonine-protein phosphatase 6 regulatory ankyrin repeat subunit A	ANKRD28	3	2	0	0	3	2	0	0	6.9	7.0852	0.87361	NaN	NaN	NaN	0.67044	NaN	NaN	NaN
O15085	Rho guanine nucleotide exchange factor 11	ARHGEF11	1	1	0	0	1	1	0	0	1.8	2.0977	NaN	NaN	NaN	NaN	NaN	NaN	NaN	NaN
O15116	U6 snRNA-associated Sm-like protein LSm1	LSM1	3	3	0	0	3	3	0	0	39.1	11.667	1.0265	1.011	NaN	NaN	0.85948	1.3483	NaN	NaN
O15118	Niemann-Pick C1 protein	NPC1	6	4	1	2	6	4	1	2	6.4	12.5	1.1193	1.0573	NaN	0.71879	0.89179	1.0448	NaN	1.0335
O15121	Sphingolipid delta(4)-desaturase DES1	DEGS1	2	1	0	0	2	1	0	0	9.6	7.6587	1.1772	NaN	NaN	NaN	0.84949	NaN	NaN	NaN
O15126	Secretory carrier-associated membrane protein 1	SCAMP1	1	3	0	0	1	3	0	0	16	6.8045	NaN	1.3231	NaN	NaN	NaN	1.0239	NaN	NaN
O15127	Secretory carrier-associated membrane protein 2	SCAMP2	2	2	0	0	2	2	0	0	13.7	8.6932	NaN	NaN	NaN	NaN	NaN	NaN	NaN	NaN
O15143	Actin-related protein 2/3 complex subunit 1B	ARPC1B	15	14	0	1	5	4	0	1	44.9	149.75	0.99728	0.99281	NaN	NaN	0.94325	0.98851	NaN	NaN
O15144	Actin-related protein 2/3 complex subunit 2	ARPC2	15	14	0	0	15	14	0	0	56	212.34	1.0061	1.0458	NaN	NaN	0.98026	1.0631	NaN	NaN
O15145	Actin-related protein 2/3 complex subunit 3	ARPC3	9	9	0	0	9	9	0	0	61.2	74.709	0.95487	0.99153	NaN	NaN	0.94558	1.0041	NaN	NaN
O15160	DNA-directed RNA polymerases I and III subunit RPAC1	POLR1C	5	8	0	0	5	8	0	0	31.5	40.227	0.81922	1.0063	NaN	NaN	0.94058	0.95157	NaN	NaN
O15164	Transcription intermediary factor 1-alpha	TRIM24	3	0	0	0	2	0	0	0	3.5	4.3412	0.67809	NaN	NaN	NaN	0.7136	NaN	NaN	NaN
O15173	Membrane-associated progesterone receptor component 2	PGRMC2	11	11	0	0	10	10	0	0	43	122.88	1.0707	1.0195	NaN	NaN	0.96913	1.0678	NaN	NaN
O15212	Prefoldin subunit 6	PFDN6	7	7	0	0	7	7	0	0	55	125.69	0.95808	0.95758	NaN	NaN	1.0023	0.94829	NaN	NaN
O15213	WD repeat-containing protein 46	WDR46	2	1	0	1	2	1	0	1	7.9	5.1731	1.2218	NaN	NaN	NaN	1.2342	NaN	NaN	NaN
O15226	NF-kappa-B-repressing factor	NKRF	9	5	3	3	9	5	3	3	19.3	18.464	0.85489	1.167	0.97669	1.2433	1.1821	1.1793	1.016	0.8623
O15230	Laminin subunit alpha-5	LAMA5	2	1	1	4	2	1	1	4	2	8.7868	1.7504	NaN	NaN	0.51586	1.0764	NaN	NaN	1.2666
O15231	Zinc finger protein 185	ZNF185	2	1	0	0	2	1	0	0	8.9	11.041	NaN	NaN	NaN	NaN	NaN	NaN	NaN	NaN
Q5T8U5	Surfeit locus protein 4	SURF4	4	4	0	0	4	4	0	0	26.9	323.31	0.97626	0.95176	NaN	NaN	0.88135	0.93964	NaN	NaN
O15269	Serine palmitoyltransferase 1	SPTLC1	5	3	0	0	5	3	0	0	11.4	16.677	0.81488	0.97978	NaN	NaN	1.0574	0.95248	NaN	NaN
O15270	Serine palmitoyltransferase 2	SPTLC2	5	5	0	0	5	5	0	0	14.4	33.002	0.92255	0.84784	NaN	NaN	0.81879	1.0157	NaN	NaN
O15294	UDP-N-acetylglucosamine--peptide N-acetylglucosaminyltransferase 110 kDa subunit	OGT	17	21	0	0	17	21	0	0	32.3	107.09	0.96903	0.97788	NaN	NaN	0.95482	1.0061	NaN	NaN
O15305	Phosphomannomutase 2;Phosphomannomutase	PMM2	10	9	1	1	9	8	1	1	48.8	54.565	1.0983	0.94106	NaN	0.99615	1.0206	1.0498	NaN	2.8462
O15355	Protein phosphatase 1G	PPM1G	20	21	0	0	20	21	0	0	49.8	305.65	0.86614	1.0309	NaN	NaN	1.0071	0.84431	NaN	NaN
O15357	Phosphatidylinositol 3,4,5-trisphosphate 5-phosphatase 2	INPPL1	14	13	0	0	14	13	0	0	22.7	46.61	0.90341	0.85985	NaN	NaN	0.82245	0.95665	NaN	NaN
O15371	Eukaryotic translation initiation factor 3 subunit D	EIF3D	15	17	1	4	15	17	1	4	49.3	323.31	0.95068	1.0362	NaN	1.069	1.0174	0.98559	NaN	1.3829
O15381	Nuclear valosin-containing protein-like	NVL	3	4	0	0	3	4	0	0	10.4	9.0064	0.90023	1.5753	NaN	NaN	1.0304	1.2424	NaN	NaN
O15397	Importin-8	IPO8	5	5	0	0	4	4	0	0	7.9	13.509	0.95913	0.93817	NaN	NaN	0.97072	1.0292	NaN	NaN
O15400	Syntaxin-7	STX7	6	6	0	0	6	6	0	0	49	101.75	0.93702	0.90111	NaN	NaN	0.95649	1.0931	NaN	NaN
O15427	Monocarboxylate transporter 4	SLC16A3	6	7	0	0	6	7	0	0	15.3	17.829	0.92622	0.85766	NaN	NaN	0.81082	1.0703	NaN	NaN
O15431	High affinity copper uptake protein 1	SLC31A1	1	1	0	0	1	1	0	0	10	7.978	NaN	1.0312	NaN	NaN	NaN	1.2019	NaN	NaN
O15438			0	0	0	2	0	0	0	2	5.1	-2	NaN	NaN	NaN	NaN	NaN	NaN	NaN	NaN	+
O15446	DNA-directed RNA polymerase I subunit RPA34	CD3EAP	6	5	0	0	6	5	0	0	31.6	54.048	0.85145	0.91476	NaN	NaN	0.81642	0.92553	NaN	NaN
O15457	MutS protein homolog 4	MSH4	0	0	1	1	0	0	1	1	2	-2	NaN	NaN	NaN	NaN	NaN	NaN	NaN	NaN	+
O15460	Prolyl 4-hydroxylase subunit alpha-2	P4HA2	6	3	0	0	6	3	0	0	15.4	16.597	1.0809	1.1715	NaN	NaN	1.0362	1.1135	NaN	NaN
O15479	Melanoma-associated antigen B2	MAGEB2	8	11	1	1	8	11	1	1	38.2	248.84	1.0821	0.96902	1.3055	1.1034	1.0068	0.99457	0.89939	1.1795
O15498	Synaptobrevin homolog YKT6	YKT6	6	8	0	0	6	8	0	0	48.5	60.566	0.95253	0.92808	NaN	NaN	0.84466	0.98208	NaN	NaN
O15511	Actin-related protein 2/3 complex subunit 5	ARPC5	6	5	0	0	6	5	0	0	53	19.948	0.89209	1.0196	NaN	NaN	1.0003	0.98253	NaN	NaN
O15541	RING finger protein 113A	RNF113A	3	2	0	0	3	2	0	0	14.6	5.0101	0.77024	0.70935	NaN	NaN	0.94197	0.81965	NaN	NaN
O43143	Pre-mRNA-splicing factor ATP-dependent RNA helicase DHX15	DHX15	35	34	4	7	34	33	4	7	55.8	323.31	1.0513	1.1199	1.0834	1.3729	1.0183	1.0022	1.0644	1.0551
O43148	mRNA cap guanine-N7 methyltransferase	RNMT	6	4	0	0	6	4	0	0	15.5	23.956	1.3735	1.089	NaN	NaN	1.1464	1.2436	NaN	NaN
O43150	Arf-GAP with SH3 domain, ANK repeat and PH domain-containing protein 2	ASAP2	1	0	0	0	1	0	0	0	0.7	-2	NaN	NaN	NaN	NaN	NaN	NaN	NaN	NaN	+
O43156	TELO2-interacting protein 1 homolog	TTI1	2	2	0	0	2	2	0	0	3.3	11.561	0.77861	0.85917	NaN	NaN	1.1689	1.2032	NaN	NaN
O43169	Cytochrome b5 type B	CYB5B	7	6	0	0	7	6	0	0	66.7	182.05	1.1685	1.0471	NaN	NaN	0.98324	1.0693	NaN	NaN
O43172	U4/U6 small nuclear ribonucleoprotein Prp4	PRPF4	13	12	0	0	13	12	0	0	33.2	65.736	0.88491	1.2373	NaN	NaN	1.1311	0.95546	NaN	NaN
O43181	NADH dehydrogenase [ubiquinone] iron-sulfur protein 4, mitochondrial	NDUFS4	2	1	0	0	2	1	0	0	14.9	3.7203	1.5212	NaN	NaN	NaN	1.5017	NaN	NaN	NaN
O43237	Cytoplasmic dynein 1 light intermediate chain 2	DYNC1LI2	10	11	0	0	9	10	0	0	34.8	81.047	0.83901	1.0439	NaN	NaN	1.0994	0.85455	NaN	NaN
O43242	26S proteasome non-ATPase regulatory subunit 3	PSMD3	17	19	0	0	17	19	0	0	40.8	184.85	1.0186	0.97883	NaN	NaN	1.0189	0.98247	NaN	NaN
O43252	Bifunctional 3-phosphoadenosine 5-phosphosulfate synthase 1;Sulfate adenylyltransferase;Adenylyl-sulfate kinase	PAPSS1	11	15	0	0	11	15	0	0	32.9	179.21	1.0777	0.83597	NaN	NaN	0.80711	1.1009	NaN	NaN
O43264	Centromere/kinetochore protein zw10 homolog	ZW10	13	10	0	0	13	10	0	0	26.8	73.33	1.0149	0.86897	NaN	NaN	0.88191	0.90834	NaN	NaN
O43290	U4/U6.U5 tri-snRNP-associated protein 1	SART1	11	12	0	0	11	12	0	0	25.2	75.818	1.0048	1.2126	NaN	NaN	1.2223	0.93242	NaN	NaN
O43324	Eukaryotic translation elongation factor 1 epsilon-1	EEF1E1	5	6	0	0	5	6	0	0	47.1	36.862	1.1726	0.99149	NaN	NaN	0.99307	1.0218	NaN	NaN
O43390	Heterogeneous nuclear ribonucleoprotein R	HNRNPR	32	31	38	40	1	1	2	2	61.1	323.31	1.0043	0.99187	0.8831	0.87779	0.93046	0.93537	0.86515	0.86993
O43390	Heterogeneous nuclear ribonucleoprotein R	HNRNPR	31	30	37	39	0	0	1	1	61	9.5589	NaN	NaN	NaN	0.83239	NaN	NaN	NaN	0.83538
O43395	U4/U6 small nuclear ribonucleoprotein Prp3	PRPF3	13	14	0	0	13	14	0	0	34.4	51.499	1.0861	1.3537	NaN	NaN	1.2299	0.98468	NaN	NaN
O43396	Thioredoxin-like protein 1	TXNL1	10	10	0	1	10	10	0	1	48.1	119.96	0.96965	1.0673	NaN	NaN	1.0369	0.94422	NaN	NaN
O43399	Tumor protein D54	TPD52L2	18	18	0	0	2	2	0	0	77.2	323.31	0.98852	0.8187	NaN	NaN	0.86425	0.9991	NaN	NaN
O43399	Tumor protein D54	TPD52L2	17	16	0	0	1	0	0	0	80.6	-2	0.76328	NaN	NaN	NaN	0.64217	NaN	NaN	NaN	+
O43447	Peptidyl-prolyl cis-trans isomerase H;Peptidyl-prolyl cis-trans isomerase	PPIH	8	8	0	0	8	8	0	0	68.9	151.19	1.1346	1.6841	NaN	NaN	1.4095	1.1151	NaN	NaN
O43488	Aflatoxin B1 aldehyde reductase member 2	AKR7A2	7	8	0	0	7	8	0	0	34.8	91.414	0.79346	1.054	NaN	NaN	1.1236	0.78088	NaN	NaN
O43504	Ragulator complex protein LAMTOR5	LAMTOR5	2	3	0	0	2	3	0	0	85.7	81.179	1.1708	1.0347	NaN	NaN	1.1499	1.2049	NaN	NaN
O43513	Mediator of RNA polymerase II transcription subunit 7	MED7	1	1	0	0	1	1	0	0	6.4	3.036	0.76075	0.7086	NaN	NaN	0.8597	0.59953	NaN	NaN
O43583	Density-regulated protein	DENR	5	6	0	0	5	6	0	0	45.5	34.701	0.87854	1.1093	NaN	NaN	1.0973	0.93814	NaN	NaN
O43592	Exportin-T	XPOT	5	5	0	0	5	5	0	0	9.5	25.531	0.90171	1.3841	NaN	NaN	0.95852	0.97672	NaN	NaN
O43615	Mitochondrial import inner membrane translocase subunit TIM44	TIMM44	17	13	0	0	17	13	0	0	38.7	122.87	0.99325	0.88622	NaN	NaN	0.91303	1.0496	NaN	NaN
O43660	Pleiotropic regulator 1	PLRG1	4	4	0	0	4	4	0	0	18.8	34.088	0.96023	1.0221	NaN	NaN	0.92769	0.94531	NaN	NaN
O43663	Protein regulator of cytokinesis 1	PRC1	2	5	0	0	2	5	0	0	12.3	22.686	0.83335	1.094	NaN	NaN	1.0097	0.80518	NaN	NaN
O43678	NADH dehydrogenase [ubiquinone] 1 alpha subcomplex subunit 2	NDUFA2	1	3	0	0	1	3	0	0	32.3	42.78	0.6465	0.96955	NaN	NaN	0.63679	0.90155	NaN	NaN
O43681	ATPase ASNA1	ASNA1	8	10	0	0	8	10	0	0	47.7	55.702	0.95845	1.0458	NaN	NaN	1.0512	0.95062	NaN	NaN
O43707	Alpha-actinin-4	ACTN4	80	77	4	4	55	51	1	0	84.1	323.31	0.97706	1.0168	1.6761	1.3919	1.0199	1.0058	0.96457	2.1197
O43709	Probable 18S rRNA (guanine-N(7))-methyltransferase	WBSCR22	1	2	0	0	1	2	0	0	7.1	3.884	0.7374	NaN	NaN	NaN	1.0235	NaN	NaN	NaN
O43715	TP53-regulated inhibitor of apoptosis 1	TRIAP1	5	5	0	0	5	5	0	0	75	24.087	1.0888	1.2974	NaN	NaN	1.1351	1.1567	NaN	NaN
O43719	HIV Tat-specific factor 1	HTATSF1	13	11	7	8	13	11	7	8	31.4	98.433	0.87741	1.0898	1.083	0.7083	1.0496	0.87377	1.0049	0.92257
O43747	AP-1 complex subunit gamma-1	AP1G1	6	7	0	0	6	7	0	0	13.3	13.755	0.97171	0.99997	NaN	NaN	0.96605	0.96067	NaN	NaN
O43752	Syntaxin-6	STX6	1	2	0	0	1	2	0	0	8.2	3.5874	NaN	NaN	NaN	NaN	NaN	NaN	NaN	NaN
O43760	Synaptogyrin-2	SYNGR2	3	4	0	0	3	4	0	0	16.1	6.2383	1.1308	0.89238	NaN	NaN	0.9192	1.208	NaN	NaN
O43765	Small glutamine-rich tetratricopeptide repeat-containing protein alpha	SGTA	9	8	0	0	9	8	0	0	32.3	88.005	1.0173	0.95315	NaN	NaN	1.0361	1.0332	NaN	NaN
O43772	Mitochondrial carnitine/acylcarnitine carrier protein	SLC25A20	2	4	0	0	2	4	0	0	16.3	5.569	NaN	1.015	NaN	NaN	NaN	0.8833	NaN	NaN
O43776	Asparagine--tRNA ligase, cytoplasmic	NARS	18	17	0	0	18	17	0	0	36.5	186.96	1.0368	0.99684	NaN	NaN	0.96094	1.0428	NaN	NaN
O43805	Sjoegren syndrome nuclear autoantigen 1	SSNA1	1	0	0	0	1	0	0	0	11.8	3.4724	NaN	NaN	NaN	NaN	NaN	NaN	NaN	NaN
O43809	Cleavage and polyadenylation specificity factor subunit 5	NUDT21	12	11	0	0	12	11	0	0	74.4	81.589	1.0296	0.97573	NaN	NaN	0.92887	1.0924	NaN	NaN
O43813	LanC-like protein 1	LANCL1	13	13	1	1	13	13	1	1	43.6	99.361	1.0725	0.99918	NaN	NaN	0.94293	1.0341	NaN	NaN
O43815	Striatin	STRN	10	9	0	0	10	9	0	0	22.8	81.659	0.98204	0.94172	NaN	NaN	0.92174	0.86966	NaN	NaN
O43818	U3 small nucleolar RNA-interacting protein 2	RRP9	7	8	0	0	7	8	0	0	20.4	33.275	1.2096	1.1222	NaN	NaN	1.0814	1.0172	NaN	NaN
O43823	A-kinase anchor protein 8	AKAP8	10	11	6	6	10	11	6	6	28.5	108.7	1.0635	1.0852	1.1259	1.2759	1.0689	0.94243	1.0174	0.98606
O43847	Nardilysin	NRD1	20	18	0	0	20	18	0	0	24.9	75.236	0.93435	0.91728	NaN	NaN	0.88696	0.8635	NaN	NaN
O43852	Calumenin	CALU	22	25	2	2	4	5	0	0	73.7	323.31	1.184	1.0284	2.4983	0.85041	0.97141	1.1669	1.2176	1.3846
O43852	Calumenin	CALU	19	21	2	2	1	1	0	0	64.8	2.5561	NaN	NaN	NaN	NaN	NaN	NaN	NaN	NaN
O43865	Putative adenosylhomocysteinase 2	AHCYL1	11	10	0	0	5	6	0	0	30.6	86.284	0.92689	0.90956	NaN	NaN	0.94175	0.96064	NaN	NaN
O43913	Origin recognition complex subunit 5	ORC5	2	1	0	0	2	1	0	0	6.5	2.5896	NaN	NaN	NaN	NaN	NaN	NaN	NaN	NaN
O43920	NADH dehydrogenase [ubiquinone] iron-sulfur protein 5	NDUFS5	3	3	0	0	3	3	0	0	38.7	18.708	1.0958	2.2105	NaN	NaN	1.0107	1.0486	NaN	NaN
O43929	Origin recognition complex subunit 4	ORC4	1	1	0	0	1	1	0	0	3.4	2.7148	NaN	NaN	NaN	NaN	NaN	NaN	NaN	NaN
O60216	Double-strand-break repair protein rad21 homolog	RAD21	8	10	0	0	8	10	0	0	25.2	98.701	0.89818	1.0228	NaN	NaN	0.98259	1.0552	NaN	NaN
O60220	Mitochondrial import inner membrane translocase subunit Tim8 A	TIMM8A	4	4	0	0	4	4	0	0	68	58.198	0.78812	0.93911	NaN	NaN	0.78271	0.98687	NaN	NaN
O60231	Putative pre-mRNA-splicing factor ATP-dependent RNA helicase DHX16	DHX16	11	11	0	0	10	10	0	0	14.4	39.379	0.90541	1.2405	NaN	NaN	1.0605	0.91051	NaN	NaN
O60232	Sjoegren syndrome/scleroderma autoantigen 1	SSSCA1	5	3	0	0	3	1	0	0	41.7	32.975	1.1367	1.0455	NaN	NaN	1.109	1.033	NaN	NaN
O60256	Phosphoribosyl pyrophosphate synthase-associated protein 2	PRPSAP2	9	8	0	0	8	7	0	0	33.6	23.747	0.9126	1.0325	NaN	NaN	0.88838	1.0845	NaN	NaN
O60264	SWI/SNF-related matrix-associated actin-dependent regulator of chromatin subfamily A member 5	SMARCA5	26	24	0	0	18	17	0	0	28.6	79.435	0.95394	1.0979	NaN	NaN	1.0192	0.86202	NaN	NaN
O60271	C-Jun-amino-terminal kinase-interacting protein 4	SPAG9	9	9	0	0	9	9	0	0	15.4	33.529	1.084	1.0591	NaN	NaN	1.0875	1.0128	NaN	NaN
O60294	tRNA wybutosine-synthesizing protein 4	LCMT2	2	0	0	0	2	0	0	0	4.2	2.9291	0.98922	NaN	NaN	NaN	0.54444	NaN	NaN	NaN
O60306	Intron-binding protein aquarius	AQR	8	6	0	0	8	6	0	0	10.3	25.829	1.0248	1.1715	NaN	NaN	0.9726	1.0857	NaN	NaN
O60341	Lysine-specific histone demethylase 1A	KDM1A	7	8	0	0	7	8	0	0	17.5	38.429	0.97923	0.93811	NaN	NaN	1.0774	0.91561	NaN	NaN
O60443	Non-syndromic hearing impairment protein 5	DFNA5	4	4	0	0	4	4	0	0	16.5	23.935	1.2957	0.80105	NaN	NaN	0.67748	1.057	NaN	NaN
O60476	Mannosyl-oligosaccharide 1,2-alpha-mannosidase IB	MAN1A2	1	1	1	1	1	1	1	1	4.4	2.5081	NaN	NaN	NaN	NaN	NaN	NaN	NaN	NaN
O60488	Long-chain-fatty-acid--CoA ligase 4	ACSL4	14	12	0	0	13	11	0	0	40.1	82.915	1.1082	1.0347	NaN	NaN	0.90956	1.0351	NaN	NaN
O60493	Sorting nexin-3	SNX3	13	12	0	0	12	11	0	0	74.7	77.948	0.95229	1.0108	NaN	NaN	0.93817	0.95398	NaN	NaN
O60502	Protein O-GlcNAcase	MGEA5	11	10	2	3	11	10	2	3	20.1	21.359	1.2554	0.94896	0.90297	0.58721	0.92191	1.0111	0.52248	0.9577
O60506	Heterogeneous nuclear ribonucleoprotein Q	SYNCRIP	40	42	36	38	2	2	2	2	71.3	323.31	1.1122	1.0631	1.38	1.0719	1.0638	1.121	1.1519	1.4024
O60506	Heterogeneous nuclear ribonucleoprotein Q	SYNCRIP	39	41	32	33	1	1	0	0	70.6	-2	NaN	NaN	NaN	NaN	NaN	NaN	NaN	NaN	+
O60518	Ran-binding protein 6	RANBP6	4	2	0	0	2	0	0	0	4.4	5.6056	1.219	NaN	NaN	NaN	1.0652	NaN	NaN	NaN
O60547	GDP-mannose 4,6 dehydratase	GMDS	6	4	0	0	6	4	0	0	24.6	15.827	0.73869	1.2221	NaN	NaN	1.0502	0.65168	NaN	NaN
O60566	Mitotic checkpoint serine/threonine-protein kinase BUB1 beta	BUB1B	3	3	0	0	3	3	0	0	7.2	4.7387	NaN	0.91808	NaN	NaN	NaN	0.28645	NaN	NaN
O60568	Procollagen-lysine,2-oxoglutarate 5-dioxygenase 3	PLOD3	26	27	0	0	26	27	0	0	47.3	228.2	0.99875	0.9182	NaN	NaN	0.9129	0.95497	NaN	NaN
O60573	Eukaryotic translation initiation factor 4E type 2	EIF4E2	4	3	0	0	4	3	0	0	23.7	26.354	0.98998	1.0532	NaN	NaN	0.95104	1.05	NaN	NaN
O60645	Exocyst complex component 3	EXOC3	3	3	0	0	3	3	0	0	5.4	4.4048	1.1908	1.3422	NaN	NaN	1.0857	1.0361	NaN	NaN
O60664	Perilipin-3	PLIN3	20	19	0	0	20	19	0	0	76.1	323.31	0.99669	0.96085	NaN	NaN	0.94085	0.98797	NaN	NaN
O60678	Protein arginine N-methyltransferase 3	PRMT3	4	3	0	0	4	3	0	0	8.7	8.0151	0.81459	1.0314	NaN	NaN	0.96883	0.88833	NaN	NaN
O60684	Importin subunit alpha-7;Importin subunit alpha-6	KPNA6	14	16	2	2	9	11	0	0	37.5	205.95	1.0773	1.02	2.276	1.3922	1.0948	0.97764	1.1142	3.2716
O60701	UDP-glucose 6-dehydrogenase	UGDH	25	29	1	2	25	29	1	2	77.1	323.31	1.1245	1.1651	2.0438	2.24	1.1356	1.121	1.33	0.92837
O60725	Protein-S-isoprenylcysteine O-methyltransferase	ICMT	2	1	0	0	2	1	0	0	13.4	2.9569	NaN	NaN	NaN	NaN	NaN	NaN	NaN	NaN
O60749	Sorting nexin-2	SNX2	14	15	0	0	13	14	0	0	35.6	264.68	1.0526	1.065	NaN	NaN	1.0553	1.0056	NaN	NaN
Q5QPK2	Dolichol-phosphate mannosyltransferase subunit 1	DPM1	3	5	0	0	3	5	0	0	22	37.963	1.2472	1.0272	NaN	NaN	1.0237	1.1673	NaN	NaN
O60763	General vesicular transport factor p115	USO1	23	21	1	0	23	21	1	0	39.3	323.31	1.0254	0.95684	NaN	NaN	0.9063	1.0179	NaN	NaN
O60783	28S ribosomal protein S14, mitochondrial	MRPS14	2	1	0	0	2	1	0	0	21.9	14.274	1.2617	1.0643	NaN	NaN	0.98709	0.84276	NaN	NaN
O60784	Target of Myb protein 1	TOM1	6	7	1	0	6	7	1	0	25.4	33.04	1.1207	0.90206	NaN	NaN	0.84036	1.3726	NaN	NaN
O60825	6-phosphofructo-2-kinase/fructose-2,6-bisphosphatase 2;6-phosphofructo-2-kinase;Fructose-2,6-bisphosphatase	PFKFB2	11	11	0	0	11	11	0	0	33.9	84.034	0.80704	0.81536	NaN	NaN	0.91821	0.92902	NaN	NaN
O60826	Coiled-coil domain-containing protein 22	CCDC22	7	5	0	0	7	5	0	0	20.9	21.329	0.90309	0.93772	NaN	NaN	1.0661	0.97286	NaN	NaN
O60828	Polyglutamine-binding protein 1	PQBP1	5	5	0	0	5	5	0	0	51.5	29.591	0.82445	0.92266	NaN	NaN	0.85722	0.81132	NaN	NaN
O60831	PRA1 family protein 2	PRAF2	3	2	0	0	3	2	0	0	22.5	64.285	1.3627	NaN	NaN	NaN	0.71707	NaN	NaN	NaN
O60832	H/ACA ribonucleoprotein complex subunit 4	DKC1	16	14	1	3	16	14	1	3	42.4	47.989	1.0169	0.92707	1.0676	0.9799	0.9222	1.0447	0.85627	1.0244
O60869	Endothelial differentiation-related factor 1	EDF1	7	9	4	2	7	9	4	2	56.8	175.65	1.0598	0.85085	0.84614	0.61503	0.93193	1.0613	0.83977	0.83437
O60870	DNA/RNA-binding protein KIN17	KIN	1	0	0	0	1	0	0	0	3.5	2.2167	NaN	NaN	NaN	NaN	NaN	NaN	NaN	NaN
O60884	DnaJ homolog subfamily A member 2	DNAJA2	13	13	0	1	13	13	0	1	48.5	180.63	0.96834	1.0841	NaN	0.92837	1.0448	0.9779	NaN	3.3528
O60885	Bromodomain-containing protein 4	BRD4	6	6	0	0	2	2	0	0	5.1	13.728	1.0708	1.2978	NaN	NaN	1.1421	0.99866	NaN	NaN
O60888	Protein CutA	CUTA	2	3	0	0	2	3	0	0	37.8	118.75	1.2232	1.0634	NaN	NaN	0.93853	1.0451	NaN	NaN
O60925	Prefoldin subunit 1	PFDN1	7	7	0	0	7	7	0	0	58.2	147.22	0.93314	0.97798	NaN	NaN	0.95669	0.92082	NaN	NaN
O60927	Protein phosphatase 1 regulatory subunit 11	PPP1R11	2	2	0	0	2	2	0	0	40.5	6.7821	NaN	0.68241	NaN	NaN	NaN	1.0722	NaN	NaN
O60934	Nibrin	NBN	1	5	0	0	1	5	0	0	11.3	7.7721	NaN	1.0371	NaN	NaN	NaN	0.70561	NaN	NaN
O60942	mRNA-capping enzyme;Polynucleotide 5-triphosphatase;mRNA guanylyltransferase	RNGTT	1	1	0	0	1	1	0	0	3.3	2.5841	NaN	NaN	NaN	NaN	NaN	NaN	NaN	NaN
O75030	Microphthalmia-associated transcription factor	MITF	1	1	0	0	1	1	0	0	6.4	5.4795	NaN	NaN	NaN	NaN	NaN	NaN	NaN	NaN
X6RH03	Glycosaminoglycan xylosylkinase	FAM20B	1	0	0	1	1	0	0	1	23.9	3.6012	NaN	NaN	NaN	NaN	NaN	NaN	NaN	NaN
O75083	WD repeat-containing protein 1	WDR1	32	30	0	0	32	30	0	0	67.2	323.31	0.89783	1.0526	NaN	NaN	1.0834	0.89427	NaN	NaN
O75116	Rho-associated protein kinase 2	ROCK2	42	36	3	3	37	31	3	3	41.4	323.31	0.9238	0.94687	3.1103	1.0321	1.0051	0.91717	0.81059	2.5046
O75131	Copine-3	CPNE3	21	20	0	0	20	19	0	0	45.8	150.85	1.0445	1.0631	NaN	NaN	0.99837	1.0078	NaN	NaN
O75152	Zinc finger CCCH domain-containing protein 11A	ZC3H11A	5	5	4	5	3	3	3	4	12.2	59.199	1.2185	0.81658	1.2545	1.0639	1.0556	1.1984	1.1686	1.2957
O75157	TSC22 domain family protein 2	TSC22D2	2	2	0	0	2	1	0	0	11.1	11.285	0.82973	NaN	NaN	NaN	1.122	NaN	NaN	NaN
O75165	DnaJ homolog subfamily C member 13	DNAJC13	4	5	0	0	4	5	0	0	4.8	17.886	1.0261	0.75919	NaN	NaN	0.99904	0.97236	NaN	NaN
O75175	CCR4-NOT transcription complex subunit 3	CNOT3	3	2	0	0	3	2	0	0	5.7	7.9275	0.87055	0.86872	NaN	NaN	0.98071	0.84001	NaN	NaN
O75223	Gamma-glutamylcyclotransferase	GGCT	7	8	0	0	7	8	0	0	54.3	35.255	1.0285	0.90221	NaN	NaN	0.76591	0.94359	NaN	NaN
O75306	NADH dehydrogenase [ubiquinone] iron-sulfur protein 2, mitochondrial	NDUFS2	7	8	0	0	7	8	0	0	23.6	47.817	0.95007	1.1359	NaN	NaN	1.0191	1.0716	NaN	NaN
O75312	Zinc finger protein ZPR1	ZPR1	8	7	0	0	8	7	0	0	31.2	44.195	0.87021	1.0257	NaN	NaN	1.0209	0.94939	NaN	NaN
O75323	Protein NipSnap homolog 2	GBAS	5	3	0	0	4	2	0	0	18.2	5.3669	1.0433	1.4422	NaN	NaN	1.1294	1.04	NaN	NaN
O75340	Programmed cell death protein 6	PDCD6	7	8	1	0	7	8	1	0	42.9	122.18	0.94075	0.97321	NaN	NaN	0.92866	0.91232	NaN	NaN
O75348	V-type proton ATPase subunit G 1	ATP6V1G1	4	6	0	0	4	6	0	0	52.5	185.33	1.3868	1.1006	NaN	NaN	1.2201	1.0845	NaN	NaN
O75351	Vacuolar protein sorting-associated protein 4B	VPS4B	5	4	0	0	3	2	0	0	15.1	5.7621	1.2795	1.0867	NaN	NaN	1.2913	0.99364	NaN	NaN
O75367	Core histone macro-H2A.1;Histone H2A	H2AFY	17	15	0	0	17	15	0	0	55.5	323.31	1.0043	1.029	NaN	NaN	0.96322	0.95191	NaN	NaN
O75368	SH3 domain-binding glutamic acid-rich-like protein	SH3BGRL	7	4	0	0	7	4	0	0	83.3	49.43	1.0147	1.0272	NaN	NaN	0.9651	1.0605	NaN	NaN
O75369	Filamin-B	FLNB	114	113	6	7	99	100	2	2	68.2	323.31	1.0333	0.9891	0.22091	0.93963	0.9906	1.0277	0.25493	1.0547
O75380	NADH dehydrogenase [ubiquinone] iron-sulfur protein 6, mitochondrial	NDUFS6	3	2	0	0	3	2	0	0	39.5	9.7564	0.97557	1.122	NaN	NaN	1.1393	1.1115	NaN	NaN
O75381	Peroxisomal membrane protein PEX14	PEX14	3	1	0	0	3	1	0	0	13.5	4.8718	0.9789	NaN	NaN	NaN	0.90715	NaN	NaN	NaN
O75391	Sperm-associated antigen 7	SPAG7	2	5	0	0	2	5	0	0	32.2	30.409	0.98168	1.1403	NaN	NaN	1.0151	1.1072	NaN	NaN
O75396	Vesicle-trafficking protein SEC22b	SEC22B	13	14	3	3	13	14	3	3	52.6	323.31	1.0215	0.90516	2.7789	1.2606	0.92841	1.0294	0.86473	2.4207
O75410	Transforming acidic coiled-coil-containing protein 1	TACC1	6	1	0	2	3	1	0	2	13.4	13.665	0.93404	NaN	NaN	0.70667	0.75473	NaN	NaN	3.5541
O75431	Metaxin-2	MTX2	7	6	0	0	7	6	0	0	47.1	97.573	1.1175	1.1411	NaN	NaN	0.9608	1.101	NaN	NaN
O75436	Vacuolar protein sorting-associated protein 26A	VPS26A	7	7	0	0	5	5	0	0	33	78.988	1.0131	1.0558	NaN	NaN	0.89409	1.0053	NaN	NaN
O75438	NADH dehydrogenase [ubiquinone] 1 beta subcomplex subunit 1	NDUFB1	3	3	0	0	3	3	0	0	67.2	7.8768	0.96851	0.88188	NaN	NaN	0.86913	1.0367	NaN	NaN
O75439	Mitochondrial-processing peptidase subunit beta	PMPCB	19	15	0	0	18	14	0	0	43.4	134.48	0.98309	1.0356	NaN	NaN	0.95869	1.0233	NaN	NaN
O75446	Histone deacetylase complex subunit SAP30	SAP30	0	1	0	0	0	1	0	0	5.5	3.0391	NaN	NaN	NaN	NaN	NaN	NaN	NaN	NaN
O75475	PC4 and SFRS1-interacting protein	PSIP1	15	12	0	0	15	11	0	0	27.2	111.28	0.84103	1.0594	NaN	NaN	1.0004	0.8614	NaN	NaN
O75477	Erlin-1	ERLIN1	3	6	0	0	1	3	0	0	27.9	15.161	NaN	1.0593	NaN	NaN	NaN	1.3398	NaN	NaN
O75489	NADH dehydrogenase [ubiquinone] iron-sulfur protein 3, mitochondrial	NDUFS3	11	10	0	0	11	10	0	0	42.4	113.3	1.0351	1.0422	NaN	NaN	0.96432	0.94286	NaN	NaN
Q5JRI1	Serine/arginine-rich splicing factor 10	SRSF10	7	7	8	8	7	7	8	8	40.7	126.28	0.8328	1.1142	0.98326	0.97407	0.96345	0.82668	1.0437	0.98043
O75506	Heat shock factor-binding protein 1	HSBP1	3	2	0	0	3	2	0	0	89.5	154.55	1.0953	1.0671	NaN	NaN	0.9832	0.90228	NaN	NaN
O75531	Barrier-to-autointegration factor;Barrier-to-autointegration factor, N-terminally processed	BANF1	7	7	0	0	7	7	0	0	66.3	145.58	1.0332	1.0496	NaN	NaN	1.0396	1.0377	NaN	NaN
O75533	Splicing factor 3B subunit 1	SF3B1	37	35	6	10	37	35	6	10	43.6	323.31	0.87195	1.1146	1.0209	1.2188	1.0708	0.92716	1.1862	0.85668
O75534	Cold shock domain-containing protein E1	CSDE1	27	27	13	16	27	27	13	16	43.7	298.13	0.95507	1.1117	1.1314	0.83732	1.1385	0.97975	1.0222	1.1771
O75569	Interferon-inducible double-stranded RNA-dependent protein kinase activator A	PRKRA	5	1	0	0	5	1	0	0	31.6	19.885	0.87191	NaN	NaN	NaN	1.216	NaN	NaN	NaN
O75607	Nucleoplasmin-3	NPM3	6	5	0	0	6	5	0	0	64.6	270.88	1.0149	1.1022	NaN	NaN	1.0793	0.94032	NaN	NaN
O75608	Acyl-protein thioesterase 1	LYPLA1	6	8	0	0	6	8	0	0	66.5	80.763	1.0424	1.0438	NaN	NaN	0.99548	0.97938	NaN	NaN
O75643	U5 small nuclear ribonucleoprotein 200 kDa helicase	SNRNP200	55	54	0	1	55	54	0	1	38.2	323.31	0.96774	1.0238	NaN	NaN	0.97542	0.90398	NaN	NaN
O75663	TIP41-like protein	TIPRL	9	7	0	0	9	7	0	0	52.9	62.364	1.009	0.88493	NaN	NaN	0.9777	0.99635	NaN	NaN
O75683	Surfeit locus protein 6	SURF6	2	2	0	2	2	2	0	2	5	3.8608	1.1398	1.1259	NaN	1.0776	1.0015	1.2027	NaN	1.2108
O75691	Small subunit processome component 20 homolog	UTP20	1	1	0	1	1	1	0	1	1.7	5.2184	NaN	NaN	NaN	0.94601	NaN	NaN	NaN	0.97879
O75694	Nuclear pore complex protein Nup155	NUP155	22	19	0	0	22	19	0	0	23.4	253.6	0.86317	1.0222	NaN	NaN	0.97085	0.88006	NaN	NaN
O75695	Protein XRP2	RP2	4	3	0	0	4	3	0	0	9.1	5.3242	0.82019	1.0393	NaN	NaN	0.97764	0.90551	NaN	NaN
O75717	WD repeat and HMG-box DNA-binding protein 1	WDHD1	9	6	0	0	9	6	0	0	14.7	33.837	0.65387	1.0076	NaN	NaN	0.87815	0.49925	NaN	NaN
O75746	Calcium-binding mitochondrial carrier protein Aralar1	SLC25A12	9	11	0	0	6	7	0	0	23.7	22.012	1.1439	1.0862	NaN	NaN	1.0087	1.0945	NaN	NaN
O75781	Paralemmin-1	PALM	3	2	0	0	3	2	0	0	12	15.663	1.0525	0.9062	NaN	NaN	0.86603	0.88274	NaN	NaN
O75792	Ribonuclease H2 subunit A	RNASEH2A	4	3	0	0	4	3	0	0	18.4	16.757	0.90953	1.0752	NaN	NaN	0.98954	0.93359	NaN	NaN
O75794	Cell division cycle protein 123 homolog	CDC123	9	9	0	0	9	9	0	0	38.4	51.778	1.0345	1.0282	NaN	NaN	1.088	1.0037	NaN	NaN
O75821	Eukaryotic translation initiation factor 3 subunit G	EIF3G	16	15	2	3	16	15	2	3	57.8	206.36	0.93576	0.93185	NaN	0.76137	0.90385	0.99249	NaN	2.0988
O75822	Eukaryotic translation initiation factor 3 subunit J	EIF3J	10	10	0	2	10	10	0	2	56.9	210.01	1.0388	1.1081	NaN	0.6076	1.0489	1.1052	NaN	1.1788
O75828	Carbonyl reductase [NADPH] 3	CBR3	4	4	0	0	2	2	0	0	17.3	4.9359	1.1446	0.89456	NaN	NaN	0.94962	0.97937	NaN	NaN
O75844	CAAX prenyl protease 1 homolog	ZMPSTE24	5	6	0	0	5	6	0	0	20.2	18.925	0.86798	1.1121	NaN	NaN	0.95546	0.91962	NaN	NaN
O75874	Isocitrate dehydrogenase [NADP] cytoplasmic	IDH1	33	33	3	3	31	31	3	2	74.6	323.31	1.1145	0.92391	4.355	1.2776	0.90579	1.138	1.0207	3.971
O75884	Putative hydrolase RBBP9	RBBP9	1	2	0	0	1	2	0	0	20.2	4.3383	NaN	0.51071	NaN	NaN	NaN	0.46995	NaN	NaN
O75886	Signal transducing adapter molecule 2	STAM2	2	2	0	0	1	1	0	0	6.9	5.3408	NaN	NaN	NaN	NaN	NaN	NaN	NaN	NaN
O75911	Short-chain dehydrogenase/reductase 3	DHRS3	4	3	0	0	4	3	0	0	17.5	7.6646	0.9041	1.7314	NaN	NaN	1.1102	1.4832	NaN	NaN
O75915	PRA1 family protein 3	ARL6IP5	5	6	0	0	5	6	0	0	28.7	91.101	0.96504	0.98438	NaN	NaN	1.0121	0.9532	NaN	NaN
O75934	Pre-mRNA-splicing factor SPF27	BCAS2	7	7	1	0	7	7	1	0	55.6	165.85	1.052	1.1018	NaN	NaN	1.0463	0.8539	NaN	NaN
O75935	Dynactin subunit 3	DCTN3	2	3	0	0	2	3	0	0	21.5	5.7887	NaN	1.6155	NaN	NaN	NaN	0.44752	NaN	NaN
O75937	DnaJ homolog subfamily C member 8	DNAJC8	7	7	0	0	7	7	0	0	41.9	126.06	0.96986	1.1115	NaN	NaN	1.1156	1.005	NaN	NaN
O75940	Survival of motor neuron-related-splicing factor 30	SMNDC1	6	5	0	1	6	5	0	1	41.2	58.047	1.1397	1.9728	NaN	NaN	1.8269	1.0433	NaN	NaN
O75947	ATP synthase subunit d, mitochondrial	ATP5H	9	10	0	0	9	10	0	0	69.6	111.06	1.0898	1.1764	NaN	NaN	1.0159	1.0233	NaN	NaN
O75955	Flotillin-1	FLOT1	13	9	0	0	13	9	0	0	36.5	91.064	0.8344	0.8818	NaN	NaN	0.74438	0.82791	NaN	NaN
O75964	ATP synthase subunit g, mitochondrial	ATP5L	5	4	0	0	5	4	0	0	54.4	74.144	0.99058	1.0103	NaN	NaN	0.98417	1.0176	NaN	NaN
O75976	Carboxypeptidase D	CPD	0	3	0	0	0	3	0	0	3.1	4.465	NaN	0.90799	NaN	NaN	NaN	1.0153	NaN	NaN
O76003	Glutaredoxin-3	GLRX3	13	13	2	4	13	13	2	4	52.5	149.73	1.0266	1.0619	0.45284	0.58305	1.0985	1.0994	0.47256	1.9748
O76021	Ribosomal L1 domain-containing protein 1	RSL1D1	9	10	11	13	9	10	11	13	35.3	100.52	0.9849	0.96501	0.97997	1.0394	1.0317	1.021	1.0135	0.96357
O76024	Wolframin	WFS1	2	3	0	0	2	3	0	0	5.6	3.8203	0.74332	0.95411	NaN	NaN	0.69105	0.69849	NaN	NaN
O76031	ATP-dependent Clp protease ATP-binding subunit clpX-like, mitochondrial	CLPX	8	9	0	0	8	9	0	0	19.7	29.107	1.2044	0.87795	NaN	NaN	0.98945	1.0131	NaN	NaN
O76071	Probable cytosolic iron-sulfur protein assembly protein CIAO1	CIAO1	4	3	0	0	4	3	0	0	13.6	12.739	1.0846	0.84908	NaN	NaN	0.82264	1.2311	NaN	NaN
P0CL80	G antigen 12F;G antigen 2E;G antigen 1;G antigen 12I;G antigen 12G;G antigen 7	GAGE12F	4	3	0	0	2	2	0	0	58.7	134.63	0.70592	0.79634	NaN	NaN	0.90836	0.85742	NaN	NaN
O76094	Signal recognition particle subunit SRP72	SRP72	15	15	0	3	15	15	0	3	37.9	131.79	1.0068	1.1544	NaN	1.2533	1.0037	1.0309	NaN	1.5481
O94760	N(G),N(G)-dimethylarginine dimethylaminohydrolase 1	DDAH1	8	10	0	0	8	10	0	0	54.4	61.697	1.1083	1.1356	NaN	NaN	1.0646	1.2033	NaN	NaN
O94763	Unconventional prefoldin RPB5 interactor 1	URI1	1	3	0	0	1	3	0	0	12	3.4166	NaN	0.4366	NaN	NaN	NaN	0.35748	NaN	NaN
O94776	Metastasis-associated protein MTA2	MTA2	16	16	0	0	15	15	0	0	40.4	113.1	1.0313	1.1212	NaN	NaN	1.0233	0.97593	NaN	NaN
O94804	Serine/threonine-protein kinase 10	STK10	3	1	0	1	2	0	0	1	7.7	2.8455	0.61266	NaN	NaN	NaN	0.63957	NaN	NaN	NaN
O94806	Serine/threonine-protein kinase D3	PRKD3	5	4	0	0	5	4	0	0	11.9	27.5	0.82126	0.99744	NaN	NaN	0.85742	0.82448	NaN	NaN
O94822	E3 ubiquitin-protein ligase listerin	LTN1	2	0	0	0	2	0	0	0	2.7	4.0979	0.78494	NaN	NaN	NaN	0.98304	NaN	NaN	NaN
O94826	Mitochondrial import receptor subunit TOM70	TOMM70A	16	16	0	0	16	16	0	0	44.1	210.65	1.1321	1.0849	NaN	NaN	0.99421	1.2061	NaN	NaN
O94830	Phospholipase DDHD2	DDHD2	2	2	0	0	2	2	0	0	8.9	12.224	1.993	1.3081	NaN	NaN	1.587	1.3075	NaN	NaN
O94842	TOX high mobility group box family member 4	TOX4	4	3	0	0	4	3	0	0	11.8	8.0088	1.1828	0.91336	NaN	NaN	0.96805	1.0178	NaN	NaN
O94855	Protein transport protein Sec24D	SEC24D	10	11	0	0	8	9	0	0	18.8	35.84	0.98064	1.1601	NaN	NaN	1.1284	0.88763	NaN	NaN
O94874	E3 UFM1-protein ligase 1	UFL1	7	9	0	0	7	9	0	0	13.5	21.245	0.7713	0.8748	NaN	NaN	0.88595	0.73507	NaN	NaN
O94888	UBX domain-containing protein 7	UBXN7	3	2	0	0	3	2	0	0	11.7	30.097	0.94199	1.0467	NaN	NaN	1.0225	0.89484	NaN	NaN
O94892	Zinc finger protein 432	ZNF432	1	2	0	1	1	2	0	1	6.7	2.1798	NaN	NaN	NaN	NaN	NaN	NaN	NaN	NaN
O94903	Proline synthase co-transcribed bacterial homolog protein	PROSC	5	5	0	0	5	5	0	0	25.8	14.296	1.0376	0.72117	NaN	NaN	0.95506	1.0207	NaN	NaN
O94906	Pre-mRNA-processing factor 6	PRPF6	20	20	0	1	20	20	0	1	33.5	58.94	0.72798	0.96588	NaN	NaN	0.91387	0.67481	NaN	NaN
O94913	Pre-mRNA cleavage complex 2 protein Pcf11	PCF11	0	1	1	1	0	1	1	1	4.2	9.6695	NaN	NaN	NaN	NaN	NaN	NaN	NaN	NaN
O94919	Endonuclease domain-containing 1 protein	ENDOD1	1	1	0	0	1	1	0	0	2.2	3.4919	NaN	NaN	NaN	NaN	NaN	NaN	NaN	NaN
O94925	Glutaminase kidney isoform, mitochondrial	GLS	26	25	0	0	1	1	0	0	49.2	2.0682	1.7161	NaN	NaN	NaN	0.98948	NaN	NaN	NaN
O94925	Glutaminase kidney isoform, mitochondrial	GLS	28	26	0	0	3	2	0	0	56.5	323.31	0.98777	1.2491	NaN	NaN	1.1252	0.95984	NaN	NaN
O94992	Protein HEXIM1	HEXIM1	12	11	1	2	11	10	1	2	49	323.31	1.1216	0.85636	1.2882	0.98746	0.90339	1.1311	0.81933	1.0208
O95071	E3 ubiquitin-protein ligase UBR5	UBR5	8	8	0	0	8	8	0	0	6.7	39.508	1.1905	1.0261	NaN	NaN	0.87889	0.91315	NaN	NaN
O95081	Arf-GAP domain and FG repeat-containing protein 2	AGFG2	1	2	0	0	1	2	0	0	7.5	4.3514	NaN	1.0256	NaN	NaN	NaN	0.81669	NaN	NaN
O95140	Mitofusin-2	MFN2	3	3	0	0	3	3	0	0	7.7	14.485	0.97264	1.2448	NaN	NaN	1.1126	0.95242	NaN	NaN
O95155	Ubiquitin conjugation factor E4 B	UBE4B	10	9	0	0	10	9	0	0	18.7	31.617	1.0535	0.9624	NaN	NaN	0.87967	1.0526	NaN	NaN
O95163	Elongator complex protein 1	IKBKAP	15	11	0	0	15	11	0	0	21.8	80.023	1.0515	1.0538	NaN	NaN	1.0377	0.97332	NaN	NaN
S4R3I5	NADH dehydrogenase [ubiquinone] 1 alpha subcomplex subunit 3	NDUFA3	1	1	0	0	1	1	0	0	85.4	2.7443	NaN	NaN	NaN	NaN	NaN	NaN	NaN	NaN
O95168	NADH dehydrogenase [ubiquinone] 1 beta subcomplex subunit 4	NDUFB4	2	3	0	0	2	3	0	0	33.3	14.729	0.91207	1.0876	NaN	NaN	1.1974	0.98356	NaN	NaN
O95169	NADH dehydrogenase [ubiquinone] 1 beta subcomplex subunit 8, mitochondrial	NDUFB8	5	3	0	0	5	3	0	0	47.3	20.151	0.90298	1.1884	NaN	NaN	0.90013	1.237	NaN	NaN
O95182	NADH dehydrogenase [ubiquinone] 1 alpha subcomplex subunit 7	NDUFA7	2	1	1	0	2	1	1	0	23	5.1558	1.35	1.3304	NaN	NaN	1.1468	1.242	NaN	NaN
O95183	Vesicle-associated membrane protein 5	VAMP5	1	1	0	0	1	1	0	0	6	2.4298	NaN	NaN	NaN	NaN	NaN	NaN	NaN	NaN
O95197	Reticulon-3;Reticulon	RTN3	4	4	0	0	4	4	0	0	28.4	59.352	1.1395	1.1557	NaN	NaN	1.0969	1.0287	NaN	NaN
O95202	LETM1 and EF-hand domain-containing protein 1, mitochondrial	LETM1	9	10	0	0	9	10	0	0	21.7	45.713	1.0967	1.1484	NaN	NaN	1.0553	1.0366	NaN	NaN
O95205	Muscleblind-like protein 2	MBLL	7	6	5	6	1	1	0	0	22	2.2651	NaN	NaN	NaN	NaN	NaN	NaN	NaN	NaN
O95218	Zinc finger Ran-binding domain-containing protein 2	ZRANB2	10	10	1	3	10	10	1	3	28.1	74.479	0.83697	0.51224	NaN	0.34877	0.58599	0.88834	NaN	0.74654
O95235	Kinesin-like protein KIF20A	KIF20A	3	5	0	0	3	5	0	0	8	12.513	0.91025	0.77914	NaN	NaN	0.90044	0.83327	NaN	NaN
O95239	Chromosome-associated kinesin KIF4A;Chromosome-associated kinesin KIF4B	KIF4A	7	4	0	0	6	3	0	0	7	16.592	0.66559	1.0015	NaN	NaN	0.76571	0.50829	NaN	NaN
O95274	Ly6/PLAUR domain-containing protein 3	LYPD3	2	1	3	2	2	1	3	2	17.6	52.156	1.1122	NaN	0.76927	0.61062	0.77735	NaN	0.76373	0.86865
O95292	Vesicle-associated membrane protein-associated protein B/C	VAPB	11	11	0	0	10	10	0	0	56.4	37.885	1.11	0.9948	NaN	NaN	0.90856	1.0605	NaN	NaN
O95295	SNARE-associated protein Snapin	SNAPIN	2	2	0	0	2	2	0	0	19.1	12.258	0.83492	0.90144	NaN	NaN	0.90547	0.86334	NaN	NaN
O95297	Myelin protein zero-like protein 1	MPZL1	3	3	2	2	3	3	2	2	31.7	82.383	1.0976	0.62735	0.90522	0.66393	0.92876	1.1581	0.88158	0.89768
O95302	Peptidyl-prolyl cis-trans isomerase FKBP9;Putative FK506-binding protein 9-like protein	FKBP9	3	3	0	0	3	3	0	0	6.8	6.2221	0.84778	1.155	NaN	NaN	0.91357	0.632	NaN	NaN
O95336	6-phosphogluconolactonase	PGLS	13	13	0	0	13	13	0	0	85.7	284.31	0.52125	0.93268	NaN	NaN	0.8351	0.50198	NaN	NaN
O95340	Bifunctional 3-phosphoadenosine 5-phosphosulfate synthase 2;Sulfate adenylyltransferase;Adenylyl-sulfate kinase	PAPSS2	4	5	0	0	4	5	0	0	9.9	19.712	1.0565	0.86149	NaN	NaN	0.93688	1.0165	NaN	NaN
O95347	Structural maintenance of chromosomes protein 2	SMC2	23	20	0	0	23	20	0	0	29.1	104.32	0.89498	1.0518	NaN	NaN	0.95437	0.80737	NaN	NaN
O95352	Ubiquitin-like modifier-activating enzyme ATG7	ATG7	4	4	0	0	4	4	0	0	11.2	25.505	0.77924	0.9303	NaN	NaN	0.90515	0.73441	NaN	NaN
O95365	Zinc finger and BTB domain-containing protein 7A	ZBTB7A	2	2	0	0	2	2	0	0	11.5	9.4558	0.62262	0.9466	NaN	NaN	0.79538	0.70712	NaN	NaN
O95372	Acyl-protein thioesterase 2	LYPLA2	8	7	0	0	8	7	0	0	49.4	87.082	0.94894	0.84411	NaN	NaN	0.93565	0.89213	NaN	NaN
O95373	Importin-7	IPO7	31	32	5	12	30	31	5	12	38.6	323.31	0.90051	0.95674	3.2004	1.0573	1.009	0.94104	0.8179	3.3022
O95376	E3 ubiquitin-protein ligase ARIH2	ARIH2	1	1	0	0	1	1	0	0	3.4	3.9745	NaN	NaN	NaN	NaN	NaN	NaN	NaN	NaN
O95379	Tumor necrosis factor alpha-induced protein 8	TNFAIP8	3	3	0	0	3	3	0	0	30.9	107.2	0.99669	1.0241	NaN	NaN	1.0385	0.78672	NaN	NaN
O95394	Phosphoacetylglucosamine mutase	PGM3	13	12	0	1	13	12	0	1	49.3	182.6	1.0026	0.84335	NaN	NaN	0.87398	1.1045	NaN	NaN
O95396	Adenylyltransferase and sulfurtransferase MOCS3;Molybdopterin-synthase adenylyltransferase;Molybdopterin-synthase sulfurtransferase	MOCS3	1	1	0	0	1	1	0	0	2.6	2.522	NaN	NaN	NaN	NaN	NaN	NaN	NaN	NaN
O95400	CD2 antigen cytoplasmic tail-binding protein 2	CD2BP2	3	5	0	0	3	5	0	0	20.8	14.125	0.92173	1.2552	NaN	NaN	1.0651	0.83497	NaN	NaN
O95425	Supervillin	SVIL	3	3	0	0	3	3	0	0	2.4	6.728	0.99722	1.1472	NaN	NaN	0.82436	0.78253	NaN	NaN
O95429	BAG family molecular chaperone regulator 4	BAG4	2	3	0	0	2	3	0	0	9.7	6.6486	0.6961	0.96678	NaN	NaN	0.9394	1.0909	NaN	NaN
O95433	Activator of 90 kDa heat shock protein ATPase homolog 1	AHSA1	10	11	0	0	10	11	0	0	47.3	148.98	1.0075	1.0115	NaN	NaN	0.98687	0.93552	NaN	NaN
O95456	Proteasome assembly chaperone 1	PSMG1	7	8	1	0	7	8	1	0	37.5	55.504	1.0633	1.031	0.209	NaN	0.99327	1.0461	1.0732	NaN
O95478	Ribosome biogenesis protein NSA2 homolog	NSA2	3	3	1	1	3	3	1	1	19.6	5.7574	1.1444	1.0569	NaN	1.1088	0.97442	1.0837	NaN	0.99999
O95486	Protein transport protein Sec24A	SEC24A	15	14	0	0	13	13	0	0	18.7	44.347	0.80697	0.88523	NaN	NaN	0.88869	0.90482	NaN	NaN
O95487	Protein transport protein Sec24B	SEC24B	6	7	0	0	4	6	0	0	8.7	22.977	0.87554	1.0184	NaN	NaN	1.0288	0.97797	NaN	NaN
O95544	NAD kinase	NADK	1	1	0	1	1	1	0	1	9.9	2.4564	NaN	NaN	NaN	NaN	NaN	NaN	NaN	NaN
Q5R3B4	Mitochondrial pyruvate carrier 2	MPC2	2	2	0	0	2	2	0	0	21	3.4707	0.97694	0.85222	NaN	NaN	1.1951	0.86972	NaN	NaN
O95571	Persulfide dioxygenase ETHE1, mitochondrial	ETHE1	9	9	1	0	9	9	1	0	63.8	95.778	1.0577	0.68323	NaN	NaN	0.70082	1.0565	NaN	NaN
O95573	Long-chain-fatty-acid--CoA ligase 3	ACSL3	21	22	0	2	20	21	0	2	44.7	260.39	0.97757	0.85189	NaN	1.1829	0.85606	1.123	NaN	2.0895
O95602	DNA-directed RNA polymerase I subunit RPA1;DNA-directed RNA polymerase	POLR1A	10	11	0	0	10	11	0	0	10.4	32.431	0.94692	1.0384	NaN	NaN	0.77763	1.0619	NaN	NaN
O95628	CCR4-NOT transcription complex subunit 4	CNOT4	1	1	0	0	1	1	0	0	6.5	3.6447	NaN	NaN	NaN	NaN	NaN	NaN	NaN	NaN
O95674	Phosphatidate cytidylyltransferase 2	CDS2	1	1	0	0	1	1	0	0	4.3	4.6997	NaN	NaN	NaN	NaN	NaN	NaN	NaN	NaN
O95714	E3 ubiquitin-protein ligase HERC2	HERC2	3	0	0	0	3	0	0	0	0.7	2.4979	0.90879	NaN	NaN	NaN	0.83323	NaN	NaN	NaN
O95716	Ras-related protein Rab-3D	RAB3D	1	4	0	0	0	3	0	0	20.5	3.6015	NaN	0.92589	NaN	NaN	NaN	0.83127	NaN	NaN
O95721	Synaptosomal-associated protein 29	SNAP29	6	5	0	0	6	5	0	0	33.7	20.155	0.71323	0.94043	NaN	NaN	0.79202	0.84843	NaN	NaN
O95747	Serine/threonine-protein kinase OSR1	OXSR1	8	6	0	0	8	6	0	0	20.9	47.025	1.0182	0.95565	NaN	NaN	1.0574	1.0017	NaN	NaN
O95757	Heat shock 70 kDa protein 4L	HSPA4L	30	29	2	2	26	26	1	1	47.3	234.29	0.81727	1.0088	NaN	NaN	0.98816	0.77486	NaN	NaN
O95758	Polypyrimidine tract-binding protein 3	PTBP3	5	5	4	4	1	1	1	1	12.7	5.9238	NaN	1.3759	NaN	NaN	NaN	1.0967	NaN	NaN
O95777	U6 snRNA-associated Sm-like protein LSm8	LSM8	5	5	0	2	5	5	0	2	54.2	59.882	0.95156	1.08	NaN	1.0479	1.0024	1.0214	NaN	0.98817
O95782	AP-2 complex subunit alpha-1	AP2A1	22	22	0	0	22	22	0	0	31.7	100.25	0.88739	1.0129	NaN	NaN	0.99133	0.89395	NaN	NaN
O95801	Tetratricopeptide repeat protein 4	TTC4	6	4	0	0	6	4	0	0	29.2	24.181	1.048	1.0723	NaN	NaN	1.0931	1.0461	NaN	NaN
O95816	BAG family molecular chaperone regulator 2	BAG2	11	12	0	0	11	12	0	0	52.1	147.37	0.94885	0.96246	NaN	NaN	0.98774	1.0298	NaN	NaN
O95817	BAG family molecular chaperone regulator 3	BAG3	7	6	0	0	7	6	0	0	27.8	27.5	0.95611	1.0054	NaN	NaN	0.85227	0.87002	NaN	NaN
O95831	Apoptosis-inducing factor 1, mitochondrial	AIFM1	22	19	0	0	14	13	0	0	43.2	195.31	0.91888	1.059	NaN	NaN	1.071	0.88395	NaN	NaN
O95833	Chloride intracellular channel protein 3	CLIC3	2	1	0	0	2	1	0	0	11.9	3.0579	1.7452	NaN	NaN	NaN	0.67318	NaN	NaN	NaN
O95857	Tetraspanin-13;Tetraspanin-31	TSPAN13	2	2	0	1	2	2	0	1	7.4	3.4595	NaN	NaN	NaN	NaN	NaN	NaN	NaN	NaN
O95861	3(2),5-bisphosphate nucleotidase 1	BPNT1	13	12	0	0	13	12	0	0	50.3	40.969	0.78716	0.98994	NaN	NaN	0.91748	0.87046	NaN	NaN
O95865	N(G),N(G)-dimethylarginine dimethylaminohydrolase 2	DDAH2	3	3	0	0	3	3	0	0	19.6	16.609	0.83479	0.76728	NaN	NaN	0.75247	0.78741	NaN	NaN
O95881	Thioredoxin domain-containing protein 12	TXNDC12	9	8	0	0	9	8	0	0	51.7	43.753	0.94288	0.9539	NaN	NaN	0.85083	0.96336	NaN	NaN
O95926	Pre-mRNA-splicing factor SYF2	SYF2	0	1	0	0	0	1	0	0	14.4	7.2429	NaN	NaN	NaN	NaN	NaN	NaN	NaN	NaN
O95983	Methyl-CpG-binding domain protein 3	MBD3	4	4	0	0	4	4	0	0	20.8	12.649	0.99458	1.2054	NaN	NaN	1.1239	1.0547	NaN	NaN
O96000	NADH dehydrogenase [ubiquinone] 1 beta subcomplex subunit 10	NDUFB10	6	7	0	0	6	7	0	0	54.7	37.522	1.0606	1.0273	NaN	NaN	1.0079	0.96266	NaN	NaN
O96005	Cleft lip and palate transmembrane protein 1	CLPTM1	9	9	0	0	9	9	0	0	24.4	44.62	0.85707	1.1206	NaN	NaN	1.1	0.95512	NaN	NaN
O96008	Mitochondrial import receptor subunit TOM40 homolog	TOMM40	8	7	0	0	8	7	0	0	41.8	265.89	0.99628	0.99831	NaN	NaN	0.96948	1.025	NaN	NaN
O96011	Peroxisomal membrane protein 11B	PEX11B	2	5	0	0	2	5	0	0	22.4	7.406	1.7823	1.098	NaN	NaN	1.2598	1.3029	NaN	NaN
O96019	Actin-like protein 6A	ACTL6A	10	11	0	0	9	10	0	0	48.5	127.56	0.8303	1.1683	NaN	NaN	1.1196	1.0971	NaN	NaN
P00167	Cytochrome b5	CYB5A	4	5	0	0	4	5	0	0	67.3	17.968	1.0819	0.9868	NaN	NaN	0.96761	1.0704	NaN	NaN
P00338	L-lactate dehydrogenase A chain	LDHA	41	43	7	9	38	40	6	9	96.1	323.31	0.95977	0.95899	5.1204	0.96154	0.99729	0.97798	0.80556	5.3581
P00367	Glutamate dehydrogenase 1, mitochondrial;Glutamate dehydrogenase 2, mitochondrial	GLUD1	15	17	0	0	15	17	0	0	41.8	128.36	1.2122	1.2101	NaN	NaN	1.0508	1.1193	NaN	NaN
P00374	Dihydrofolate reductase	DHFR	4	4	0	0	3	3	0	0	40.1	11.381	0.84551	0.65845	NaN	NaN	1.5689	0.79077	NaN	NaN
P00387	NADH-cytochrome b5 reductase 3;NADH-cytochrome b5 reductase 3 membrane-bound form;NADH-cytochrome b5 reductase 3 soluble form	CYB5R3	12	12	0	0	12	12	0	0	77	286.33	1.0637	1.1716	NaN	NaN	1.0389	1.0702	NaN	NaN
P00390	Glutathione reductase, mitochondrial	GSR	7	8	0	0	7	8	0	0	35.3	62.149	1.093	1.0097	NaN	NaN	1.0778	0.9849	NaN	NaN
P00395	Cytochrome c oxidase subunit 1	MT-CO1	1	0	0	0	1	0	0	0	6	8.56	1.5454	NaN	NaN	NaN	1.0596	NaN	NaN	NaN
P00403	Cytochrome c oxidase subunit 2	MT-CO2	7	8	0	0	7	8	0	0	44.9	84.161	1.2607	1.2355	NaN	NaN	1.0639	1.0808	NaN	NaN
P00414	Cytochrome c oxidase subunit 3	MT-CO3	1	1	0	0	1	1	0	0	5.4	2.559	NaN	1.5678	NaN	NaN	NaN	0.89566	NaN	NaN
P00441	Superoxide dismutase [Cu-Zn]	SOD1	10	10	0	0	10	10	0	0	86.4	323.31	1.0028	1.0018	NaN	NaN	1.0159	1.0387	NaN	NaN
P00491	Purine nucleoside phosphorylase	PNP	15	16	0	0	15	16	0	0	74.7	251.35	0.92453	0.9355	NaN	NaN	0.90601	0.87937	NaN	NaN
P00492	Hypoxanthine-guanine phosphoribosyltransferase	HPRT1	10	10	0	0	10	10	0	0	56.9	119.7	1.0384	1.0629	NaN	NaN	1.1755	1.0849	NaN	NaN
P00505	Aspartate aminotransferase, mitochondrial	GOT2	25	25	0	0	25	25	0	0	60.9	310.24	1.0234	1.1116	NaN	NaN	0.98398	1.0025	NaN	NaN
P00533	Epidermal growth factor receptor;Receptor protein-tyrosine kinase	EGFR	32	27	11	24	32	27	11	24	38.6	323.31	0.44812	1.0522	0.48039	0.83006	1.0584	0.4298	0.91705	0.44511
P00558	Phosphoglycerate kinase 1	PGK1	42	43	4	6	42	43	4	6	91.4	323.31	0.95035	0.98647	3.3769	1.3908	1.0133	0.98593	0.85891	3.3954
Q5T9B7	Adenylate kinase isoenzyme 1	AK1	12	11	1	2	12	11	1	2	60	127.34	1.0568	0.99156	NaN	1.1216	1.0523	1.0215	NaN	1.863
P00813	Adenosine deaminase	ADA	9	7	0	0	9	7	0	0	27.3	19.621	0.82613	0.94445	NaN	NaN	0.92121	0.91551	NaN	NaN
P00846	ATP synthase subunit a	MT-ATP6	1	1	0	0	1	1	0	0	11.1	17.571	NaN	NaN	NaN	NaN	NaN	NaN	NaN	NaN
P00966	Argininosuccinate synthase	ASS1	24	24	1	4	24	24	1	4	51.9	323.31	1.1435	1.1514	NaN	1.2435	0.95623	0.99676	NaN	3.0803
Q5H9A7	Metalloproteinase inhibitor 1	TIMP1	2	2	0	0	2	2	0	0	24.5	3.7296	0.89199	0.99947	NaN	NaN	0.75825	1.0295	NaN	NaN
P01100	Proto-oncogene c-Fos	FOS	4	2	0	0	4	2	0	0	17.9	9.7572	0.60079	0.90343	NaN	NaN	0.78701	0.71087	NaN	NaN
P01111	GTPase NRas;GTPase KRas;GTPase KRas, N-terminally processed;GTPase HRas;GTPase HRas, N-terminally processed	NRAS	9	6	0	0	9	6	0	0	68.8	37.664	0.92978	1.1535	NaN	NaN	0.93826	1.0275	NaN	NaN
P02545	Prelamin-A/C;Lamin-A/C	LMNA	64	64	9	15	63	63	8	14	67.5	323.31	1.0977	0.99437	1.2482	1.166	0.96196	1.1148	0.96349	1.204
P02786	Transferrin receptor protein 1;Transferrin receptor protein 1, serum form	TFRC	49	47	18	20	49	47	18	20	60.3	323.31	1.062	0.98043	1.4364	1.0554	0.95738	1.0453	0.93503	1.3597
P02792	Ferritin light chain	FTL	6	6	0	0	6	6	0	0	39.4	20.405	1.4425	1.0943	NaN	NaN	1.1029	1.5646	NaN	NaN
P02794	Ferritin heavy chain;Ferritin heavy chain, N-terminally processed;Ferritin	FTH1	16	13	6	10	16	13	6	10	76.5	81.884	1.4856	0.97487	4.272	0.94365	1.0533	1.6602	0.91649	4.3089
P02795	Metallothionein-2;Metallothionein-1G;Metallothionein-1M;Metallothionein-1E	MT2A	3	4	3	3	0	0	0	0	67.2	72.474	1.0158	1.062	0.023285	0.040633	0.91631	0.95098	0.0094837	0.014259			+
P03886	NADH-ubiquinone oxidoreductase chain 1	MT-ND1	1	1	0	0	1	1	0	0	6.3	3.9343	NaN	NaN	NaN	NaN	NaN	NaN	NaN	NaN
P03905	NADH-ubiquinone oxidoreductase chain 4	MT-ND4	0	1	0	0	0	1	0	0	5.9	13.583	NaN	NaN	NaN	NaN	NaN	NaN	NaN	NaN
P03928	ATP synthase protein 8	MT-ATP8	2	2	0	0	2	2	0	0	29.4	11.587	1.0417	1.0065	NaN	NaN	1.126	1.1355	NaN	NaN
P04040	Catalase	CAT	10	9	0	0	10	9	0	0	26.6	69.76	0.84561	0.87174	NaN	NaN	0.74845	0.86108	NaN	NaN
P04062	Glucosylceramidase	GBA	7	7	0	0	7	7	0	0	27.2	41.281	0.9254	0.92085	NaN	NaN	0.82794	1.0316	NaN	NaN
P04075	Fructose-bisphosphate aldolase A;Fructose-bisphosphate aldolase	ALDOA	42	42	7	9	37	37	7	9	93.7	323.31	0.98992	0.94634	0.44509	0.94991	0.95733	0.99773	0.47028	3.1269
P04080	Cystatin-B	CSTB	6	6	1	1	6	6	1	1	79.6	269.4	1.0697	0.97391	NaN	NaN	0.97822	1.0175	NaN	NaN
P04083	Annexin A1	ANXA1	27	28	0	0	27	28	0	0	75.4	323.31	0.98837	0.94402	NaN	NaN	0.90691	0.96437	NaN	NaN
P04114	Apolipoprotein B-100;Apolipoprotein B-48	APOB	7	2	0	0	6	2	0	0	1.5	19.84	0.2874	0.67677	NaN	NaN	0.44769	3.0024	NaN	NaN
P04150	Glucocorticoid receptor	NR3C1	3	5	0	0	3	5	0	0	9.9	18.365	1.2581	1.0787	NaN	NaN	0.87778	1.1263	NaN	NaN
P04179	Superoxide dismutase [Mn], mitochondrial	SOD2	7	7	0	0	7	7	0	0	50.9	72.625	1.2442	1.174	NaN	NaN	1.0315	1.2838	NaN	NaN
P04181	Ornithine aminotransferase, mitochondrial;Ornithine aminotransferase, hepatic form;Ornithine aminotransferase, renal form	OAT	10	9	0	0	10	9	0	0	41.5	22.773	1.0927	1.0834	NaN	NaN	0.9007	1.0204	NaN	NaN
P04275	von Willebrand factor;von Willebrand antigen 2	VWF	1	0	1	0	1	0	1	0	0.9	2.7426	NaN	NaN	NaN	NaN	NaN	NaN	NaN	NaN
P04350	Tubulin beta-4A chain	TUBB4A	32	33	13	14	2	3	0	0	78.6	160.83	0.71497	0.86593	NaN	NaN	0.96546	0.80713	NaN	NaN
P04406	Glyceraldehyde-3-phosphate dehydrogenase	GAPDH	37	39	7	11	36	38	6	10	97	323.31	1.0345	0.95204	1.9336	1.5651	1.0207	1.1069	1.0469	1.2701
P04733	Metallothionein-1F;Metallothionein	MT1F	1	1	1	1	1	1	1	1	67.2	3.0832	0.76536	NaN	NaN	NaN	0.77037	NaN	NaN	NaN
P04792	Heat shock protein beta-1	HSPB1	20	19	9	12	20	19	9	12	94.1	323.31	0.92879	0.72682	2.2766	1.1623	0.80424	1.0394	0.75001	2.4798
P04818	Thymidylate synthase	TYMS	13	12	0	0	13	12	0	0	42.2	323.31	0.87958	0.80308	NaN	NaN	0.86122	0.84153	NaN	NaN
P04843	Dolichyl-diphosphooligosaccharide--protein glycosyltransferase subunit 1	RPN1	29	34	0	0	29	34	0	0	65.9	323.31	1.007	1.0248	NaN	NaN	0.99493	0.98741	NaN	NaN
P04844	Dolichyl-diphosphooligosaccharide--protein glycosyltransferase subunit 2	RPN2	19	21	0	0	19	21	0	0	49.8	323.31	1.0412	1.078	NaN	NaN	0.98547	0.99769	NaN	NaN
P04899	Guanine nucleotide-binding protein G(i) subunit alpha-2	GNAI2	12	11	0	1	4	4	0	0	38.6	44.519	0.97644	1.1222	NaN	NaN	0.93956	1.0609	NaN	NaN
Q93077	Histone H2A type 1-C;Histone H2A type 3;Histone H2A type 1-B/E	HIST1H2AC	8	7	3	2	2	2	0	0	57.7	113.83	0.805	0.96823	NaN	NaN	1.0025	0.83314	NaN	NaN
P04920	Anion exchange protein 2	SLC4A2	5	2	0	1	5	2	0	1	7.6	14.123	1.114	0.86791	NaN	NaN	0.91857	0.90583	NaN	NaN
P05023	Sodium/potassium-transporting ATPase subunit alpha-1	ATP1A1	45	45	5	4	26	26	2	1	49	323.31	1.018	0.94949	1.163	1.0395	0.92796	1.0222	0.86682	1.0756
P05026	Sodium/potassium-transporting ATPase subunit beta-1	ATP1B1	10	9	7	7	10	9	7	7	39.9	140.4	0.93723	1.0105	0.91576	0.71653	0.89243	0.90142	0.85904	0.89456
P05091	Aldehyde dehydrogenase, mitochondrial	ALDH2	15	14	0	0	14	13	0	0	34.8	60.749	1.0011	1.0841	NaN	NaN	0.98013	1.0201	NaN	NaN
P05114	Non-histone chromosomal protein HMG-14	HMGN1	9	6	0	0	9	6	0	0	52	68.355	0.85582	0.97883	NaN	NaN	0.91731	0.97517	NaN	NaN
P05141	ADP/ATP translocase 2;ADP/ATP translocase 2, N-terminally processed	SLC25A5	31	32	1	2	13	15	0	0	73.2	232.36	1.1011	1.1092	1.4571	1.5612	1.0215	1.0619	0.92521	1.0927
P05187	Alkaline phosphatase, placental type	ALPP	34	35	15	15	16	16	6	5	69.3	323.31	1.1399	0.93337	1.3591	0.96825	1.0344	1.3252	1.137	1.5991
P05198	Eukaryotic translation initiation factor 2 subunit 1	EIF2S1	23	23	0	0	23	23	0	0	74.6	296.88	0.96649	1.0438	NaN	NaN	1.0498	0.98454	NaN	NaN
P05204	Non-histone chromosomal protein HMG-17	HMGN2	8	8	0	0	7	7	0	0	53.3	310.86	1.0494	1.0689	NaN	NaN	0.96473	1.081	NaN	NaN
P05362	Intercellular adhesion molecule 1	ICAM1	1	3	1	2	1	3	1	2	13	9.2531	NaN	1.987	NaN	0.86567	NaN	2.3757	NaN	2.0916
P05386	60S acidic ribosomal protein P1	RPLP1	7	8	0	1	6	6	0	1	99.1	323.31	0.97726	1.0573	NaN	NaN	1.0024	0.94421	NaN	NaN
P05387	60S acidic ribosomal protein P2	RPLP2	15	17	0	0	14	15	0	0	97.4	323.31	0.89907	0.9832	NaN	NaN	0.99147	0.93241	NaN	NaN
P05388	60S acidic ribosomal protein P0;60S acidic ribosomal protein P0-like	RPLP0	21	19	0	2	21	19	0	2	65	323.31	0.93434	1.0448	NaN	1.2301	0.99564	0.96818	NaN	1.7201
S4R371	Fatty acid-binding protein, heart	FABP3	3	4	0	0	3	4	0	0	27.3	12.082	1.7583	0.877	NaN	NaN	0.85358	1.906	NaN	NaN
P05455	Lupus La protein	SSB	25	25	8	9	25	25	8	9	57.1	323.31	1.1201	1.175	1.2249	0.945	1.0806	1.038	0.96631	1.1283
P05556	Integrin beta-1	ITGB1	21	25	22	25	21	25	22	25	38.7	255.65	1.211	1.1243	1.1062	0.85998	1.1211	1.1853	1.0551	1.1634
P05783	Keratin, type I cytoskeletal 18	KRT18	63	62	9	13	47	45	6	9	92.1	323.31	1.2899	0.93514	1.7619	1.7027	0.96919	1.4111	1.0875	1.5556
P05976	Myosin light chain 1/3, skeletal muscle isoform;Myosin light chain 3	MYL1	2	2	0	1	2	2	0	1	10.7	36.204	0.99566	1.0211	NaN	1.3042	0.94216	1.0927	NaN	2.1334
P06132	Uroporphyrinogen decarboxylase	UROD	8	9	0	0	8	9	0	0	37.9	63.536	1.0512	0.91197	NaN	NaN	0.83524	1.0373	NaN	NaN
P06576	ATP synthase subunit beta, mitochondrial;ATP synthase subunit beta	ATP5B	30	30	2	3	30	30	2	3	74.9	323.31	1.0631	1.0858	1.5093	1.3243	1.0177	1.0267	0.67209	0.92099
P06703	Protein S100-A6;Protein S100	S100A6	13	12	2	3	13	12	2	3	97.8	323.31	1.0969	0.98578	3.1887	1.6389	0.96811	1.0998	1.0682	2.8667
P06730	Eukaryotic translation initiation factor 4E	EIF4E	9	10	0	0	9	10	0	0	47	62.569	0.93149	0.92632	NaN	NaN	0.94988	1.0226	NaN	NaN
P06733	Alpha-enolase	ENO1	42	43	17	18	39	40	15	16	80.4	323.31	1.0621	1.0105	4.7401	0.96981	1.0211	1.0426	0.88509	4.7773
P06737	Glycogen phosphorylase, liver form;Alpha-1,4 glucan phosphorylase	PYGL	33	32	0	0	27	25	0	0	52.9	323.31	0.92527	0.76356	NaN	NaN	0.81256	0.92274	NaN	NaN
P06744	Glucose-6-phosphate isomerase	GPI	37	38	2	4	28	29	1	3	63.8	323.31	0.98078	0.99583	NaN	0.84859	1.0099	0.96512	NaN	4.4855
P06748	Nucleophosmin	NPM1	25	25	12	12	25	25	12	12	72.1	323.31	1.0657	1.0854	1.0695	1.0477	1.0542	1.1098	0.89948	1.0863
P06753		TPM3	27	27	3	4	0	0	0	0	79	272.74	0.97019	0.98746	2.6179	1.2662	1.0439	1.0103	1.0067	2.8993
P06756	Integrin alpha-V;Integrin alpha-V heavy chain;Integrin alpha-V light chain	ITGAV	7	8	0	1	7	8	0	1	15.8	27.657	1.0329	1.0677	NaN	NaN	0.91177	1.0162	NaN	NaN
P07099	Epoxide hydrolase 1	EPHX1	20	21	0	0	20	21	0	0	51.6	121.99	0.92947	1.1817	NaN	NaN	0.95671	0.80269	NaN	NaN
P07108	Acyl-CoA-binding protein	DBI	11	11	0	0	11	11	0	0	90.8	323.31	0.97146	0.93819	NaN	NaN	0.96756	0.94539	NaN	NaN
P07237	Protein disulfide-isomerase	P4HB	48	46	12	17	48	46	12	17	84.3	323.31	1.044	0.96488	2.1187	1.1031	0.90231	1.0124	0.87087	1.9995
P07305	Histone H1.0;Histone H1.0, N-terminally processed	H1F0	2	4	0	0	2	4	0	0	17	10.102	0.7796	0.79561	NaN	NaN	0.72592	0.85183	NaN	NaN
P07311	Acylphosphatase-1;Acylphosphatase	ACYP1	4	6	0	0	4	6	0	0	62.6	17.036	1.3047	1.6049	NaN	NaN	1.3095	1.0765	NaN	NaN
P07355	Annexin A2;Annexin	ANXA2	46	49	10	14	12	12	2	4	92	323.31	1.0774	1.0611	2.5645	1.4262	1.0428	1.0506	0.99698	2.3504
P07384	Calpain-1 catalytic subunit	CAPN1	13	12	1	0	13	12	1	0	28.2	53.126	0.90314	1.0344	NaN	NaN	1.0398	0.94265	NaN	NaN
Q5JP53	Tubulin beta chain	TUBB	41	40	20	20	8	8	6	6	78.4	323.31	0.81833	0.99581	2.4338	1.8727	1.0207	0.88642	1.1191	2.0279
P07602	Prosaposin;Saposin-A;Saposin-B-Val;Saposin-B;Saposin-C;Saposin-D	PSAP	16	16	8	7	16	16	8	7	38.9	66.463	1.11	1.0424	1.0776	0.72973	0.97699	1.0323	0.7939	0.99883
Q5URX0	Beta-hexosaminidase subunit beta;Beta-hexosaminidase subunit beta chain B;Beta-hexosaminidase subunit beta chain A	HEXB	3	3	0	0	3	3	0	0	20.8	9.6845	1.3644	1.1546	NaN	NaN	1.5184	1.2092	NaN	NaN
P07711	Cathepsin L1;Cathepsin L1 heavy chain;Cathepsin L1 light chain	CTSL	1	2	0	0	1	2	0	0	5.1	33.359	NaN	NaN	NaN	NaN	NaN	NaN	NaN	NaN
P07737	Profilin-1	PFN1	18	17	7	9	18	17	7	9	93.6	323.31	0.95092	1.0083	3.9905	1.1507	1.0376	0.96074	0.96307	4.1426
P07741	Adenine phosphoribosyltransferase	APRT	9	11	1	1	9	11	1	1	71.1	284.11	0.75776	0.93038	NaN	1.724	0.97841	0.85615	NaN	2.2206
P07814	Bifunctional glutamate/proline--tRNA ligase;Glutamate--tRNA ligase;Proline--tRNA ligase	EPRS	80	75	3	5	79	74	3	5	65.3	323.31	1.0453	1.0279	2.4379	1.3382	1.0329	1.0517	0.95052	2.1536
P07858	Cathepsin B;Cathepsin B light chain;Cathepsin B heavy chain	CTSB	6	6	0	0	6	6	0	0	22.1	19.577	1.3121	1.2102	NaN	NaN	1.0862	1.0069	NaN	NaN
P07900	Heat shock protein HSP 90-alpha	HSP90AA1	76	80	23	22	53	58	12	11	76	323.31	0.98915	0.98043	4.1276	1.1807	0.99776	1.0341	0.87474	4.0233
P07919	Cytochrome b-c1 complex subunit 6, mitochondrial	UQCRH	4	5	0	0	4	5	0	0	67	34.554	1.0176	0.98406	NaN	NaN	1.0672	1.1631	NaN	NaN
P07951			15	19	1	1	0	0	0	0	53.5	323.31	0.77028	0.96212	NaN	NaN	1.0396	0.81338	NaN	NaN
P07954	Fumarate hydratase, mitochondrial	FH	20	22	0	0	20	22	0	0	61.9	323.31	0.93441	1.0839	NaN	NaN	1.0399	0.96993	NaN	NaN
P07998	Ribonuclease pancreatic	RNASE1	0	0	0	1	0	0	0	1	14.1	-2	NaN	NaN	NaN	NaN	NaN	NaN	NaN	NaN	+
P08047	Transcription factor Sp1	SP1	5	5	0	0	5	5	0	0	13.1	45.463	0.8858	1.0885	NaN	NaN	0.93719	1.0029	NaN	NaN
P08133	Annexin A6;Annexin	ANXA6	46	44	0	0	20	20	0	0	71.9	323.31	0.9974	1.0517	NaN	NaN	1.0176	0.93296	NaN	NaN
Q5JR08	Rho-related GTP-binding protein RhoC	RHOC	10	10	0	1	1	1	0	0	58.5	10.523	1.1551	1.7221	NaN	NaN	0.57318	1.1231	NaN	NaN
P08195	4F2 cell-surface antigen heavy chain	SLC3A2	37	38	19	24	1	1	0	0	66.4	3.2683	1.21	1.2146	NaN	NaN	1.3113	1.1469	NaN	NaN
P08238	Heat shock protein HSP 90-beta	HSP90AB1	69	71	31	36	27	29	11	15	80.9	323.31	0.94554	0.9923	3.8302	1.1933	1.0341	0.9739	0.84632	3.806
P08240	Signal recognition particle receptor subunit alpha	SRPR	15	19	1	1	15	19	1	1	38.9	68.457	1.0918	0.91232	NaN	1.059	0.87358	1.0708	NaN	1.3324
P08243	Asparagine synthetase [glutamine-hydrolyzing]	ASNS	12	12	0	1	12	12	0	1	30.2	49.572	1.1512	1.0537	NaN	1.6079	1.0315	1.0291	NaN	2.4022
P08559	Pyruvate dehydrogenase E1 component subunit alpha, somatic form, mitochondrial	PDHA1	17	15	0	0	17	15	0	0	55.6	98.691	1.1207	1.1677	NaN	NaN	1.1102	1.1847	NaN	NaN
P08574	Cytochrome c1, heme protein, mitochondrial	CYC1	9	8	0	0	9	8	0	0	31.1	122.04	1.1307	1.0528	NaN	NaN	1.065	1.1409	NaN	NaN
P08579	U2 small nuclear ribonucleoprotein B	SNRPB2	7	5	0	0	5	3	0	0	39.6	22.923	0.86249	1.0186	NaN	NaN	0.90103	0.9122	NaN	NaN
P08581	Hepatocyte growth factor receptor	MET	1	2	0	0	1	2	0	0	1.7	6.8989	NaN	1.2644	NaN	NaN	NaN	0.8013	NaN	NaN
P08621	U1 small nuclear ribonucleoprotein 70 kDa	SNRNP70	20	20	15	17	1	1	1	1	54.5	158.06	1.0728	1.0789	1.2581	1.0147	1.014	0.97406	1.0281	1.1552
P08648	Integrin alpha-5;Integrin alpha-5 heavy chain;Integrin alpha-5 light chain	ITGA5	1	0	0	0	1	0	0	0	1.5	2.44	NaN	NaN	NaN	NaN	NaN	NaN	NaN	NaN
P08670	Vimentin	VIM	63	63	8	11	51	51	6	8	90.8	323.31	1.0271	1.0167	1.1585	1.0358	0.89081	0.92546	0.88847	0.92839
P08754	Guanine nucleotide-binding protein G(k) subunit alpha	GNAI3	15	13	0	1	9	8	0	0	43.8	109.62	1.0166	1.069	NaN	NaN	1.0186	0.9326	NaN	NaN
P08758	Annexin A5;Annexin	ANXA5	27	27	1	1	27	27	1	1	82.8	323.31	1.0318	1.045	NaN	NaN	0.98953	0.95668	NaN	NaN
P08F94	Fibrocystin	PKHD1	1	2	0	0	1	2	0	0	1.6	2.7385	NaN	NaN	NaN	NaN	NaN	NaN	NaN	NaN
P09012	U1 small nuclear ribonucleoprotein A	SNRPA	10	10	0	1	8	8	0	1	44.7	133.03	1.0583	0.96431	NaN	NaN	1.0267	0.9813	NaN	NaN
P09104	Gamma-enolase;Enolase	ENO2	11	13	2	2	8	10	0	0	53.7	46.238	1.0412	0.78537	NaN	NaN	0.7926	0.94559	NaN	NaN
P09110	3-ketoacyl-CoA thiolase, peroxisomal	ACAA1	7	8	0	0	7	8	0	0	28.8	100.35	0.97774	0.95599	NaN	NaN	1.0101	0.98394	NaN	NaN
P09132	Signal recognition particle 19 kDa protein	SRP19	2	2	0	0	2	2	0	0	36.1	8.3761	NaN	0.84083	NaN	NaN	NaN	0.75975	NaN	NaN
P09234	U1 small nuclear ribonucleoprotein C	SNRPC	6	6	1	2	6	6	1	2	26.4	148.5	1.0501	1.0217	1.1619	0.90372	1.0561	1.0659	1.0511	1.2171
P09382	Galectin-1	LGALS1	13	14	6	7	13	14	6	7	94.1	323.31	0.90562	0.94036	2.1651	1.467	0.83598	0.85851	0.94471	1.9046
P09417	Dihydropteridine reductase	QDPR	5	5	0	0	5	5	0	0	30.5	20.552	0.99147	0.96913	NaN	NaN	0.9217	0.89601	NaN	NaN
P09429	High mobility group protein B1	HMGB1	17	17	6	6	14	13	4	3	54.4	223.56	0.95125	1.0334	0.54218	0.50621	1.02	0.98956	0.60038	0.74464
P09488	Glutathione S-transferase Mu 1	GSTM1	7	6	0	0	1	0	0	0	34.9	57.889	1.1469	0.84433	NaN	NaN	0.8534	0.92196	NaN	NaN
P09493	Tropomyosin alpha-1 chain	TPM1	10	12	1	1	0	0	0	0	37.3	8.0552	NaN	1.6757	NaN	NaN	NaN	0.59431	NaN	NaN
P09496	Clathrin light chain A	CLTA	7	8	0	0	7	8	0	0	30.3	162.22	0.90177	0.96864	NaN	NaN	0.94937	0.90902	NaN	NaN
P09497	Clathrin light chain B	CLTB	6	6	0	0	6	6	0	0	29.4	68.244	1.0219	1.1355	NaN	NaN	0.90645	0.99275	NaN	NaN
P09525	Annexin A4;Annexin	ANXA4	20	19	0	0	20	19	0	0	60.2	323.31	1.1077	0.92975	NaN	NaN	0.92126	1.1551	NaN	NaN
P09543	2,3-cyclic-nucleotide 3-phosphodiesterase	CNP	6	10	0	0	6	10	0	0	30.7	28.236	0.92947	0.89391	NaN	NaN	1.1748	0.90393	NaN	NaN
P09601	Heme oxygenase 1	HMOX1	3	2	0	0	3	2	0	0	18.4	6.5846	1.6738	1.3335	NaN	NaN	2.711	1.841	NaN	NaN
P09622	Dihydrolipoyl dehydrogenase, mitochondrial;Dihydrolipoyl dehydrogenase	DLD	20	19	0	0	20	19	0	0	44.4	323.31	1.0524	1.1324	NaN	NaN	1.0539	0.98675	NaN	NaN
P09651	Heterogeneous nuclear ribonucleoprotein A1;Heterogeneous nuclear ribonucleoprotein A1, N-terminally processed	HNRNPA1	39	39	32	35	38	38	30	33	77.7	323.31	1.0608	1.0604	1.0697	0.99304	1.0408	1.0592	0.9942	1.0535
P09661	U2 small nuclear ribonucleoprotein A	SNRPA1	8	11	0	0	8	11	0	0	49.4	106.51	0.85945	0.98218	NaN	NaN	1.0267	1.052	NaN	NaN
P09669	Cytochrome c oxidase subunit 6C	COX6C	4	6	0	0	4	6	0	0	50.7	8.8393	1.0832	1.04	NaN	NaN	1.0222	0.97505	NaN	NaN
P09874	Poly [ADP-ribose] polymerase 1	PARP1	38	38	3	3	38	38	3	3	53.6	240.77	1.1206	1.1181	1.3071	1.4229	1.0192	1.0356	0.91467	1.1591
P09960	Leukotriene A-4 hydrolase	LTA4H	29	28	0	0	29	28	0	0	55.8	323.31	0.92616	0.99656	NaN	NaN	0.9844	0.9043	NaN	NaN
P09972	Fructose-bisphosphate aldolase C;Fructose-bisphosphate aldolase	ALDOC	18	15	0	1	13	10	0	1	58.2	179.88	1.5244	1.0155	NaN	0.71377	0.99946	1.131	NaN	3.0199
Q71UI9	Histone H2A.V;Histone H2A.Z;Histone H2A	H2AFV	7	7	4	2	5	5	2	1	56.2	323.31	0.96379	1.0541	0.8895	1.0119	0.96809	0.93531	0.88378	0.82226
P0C7X3	Putative cyclin-Y-like protein 3	CCNYL3	0	0	0	1	0	0	0	1	3.5	3.184	NaN	NaN	NaN	NaN	NaN	NaN	NaN	NaN
P0CG12	Chromosome transmission fidelity protein 8 homolog isoform 2	CHTF8	6	7	0	0	6	7	0	0	27.3	43.224	1.7493	0.56733	NaN	NaN	0.80157	2.4128	NaN	NaN
Q6ICJ4	Glutathione S-transferase theta-2B;Glutathione S-transferase theta-2	Em:AP000351.3	4	4	0	0	4	4	0	0	35.7	21.81	1.3643	1.152	NaN	NaN	1.0133	1.0986	NaN	NaN
P0CG38	POTE ankyrin domain family member I	POTEI	9	10	6	6	1	1	0	0	7.9	2.2096	NaN	NaN	NaN	NaN	NaN	NaN	NaN	NaN
P0DMV8	Heat shock 70 kDa protein 1A	HSPA1A	38	40	6	10	1	1	0	0	60.6	-2	1.1114	0.99579	NaN	NaN	1.0263	1.0024	NaN	NaN	+
P0DN76	Splicing factor U2AF 35 kDa subunit;Splicing factor U2AF 26 kDa subunit	U2AF1	12	12	4	4	12	12	4	4	42.5	171.03	1.1238	1.092	1.2163	1.2706	1.046	1.1733	1.0565	1.0854
P0DN79	Cystathionine beta-synthase	CBS	18	19	0	0	18	19	0	0	54.6	229	0.71101	0.76698	NaN	NaN	0.77678	0.68848	NaN	NaN
P0DP25		CALM2	18	18	0	1	18	18	0	1	99.3	323.31	1.0131	0.97922	NaN	NaN	1.015	1.0055	NaN	NaN
P0DPB6			2	2	0	0	2	2	0	0	28.6	5.1786	0.89653	NaN	NaN	NaN	0.89629	NaN	NaN	NaN
P0DPH8	Tubulin alpha-3E chain	TUBA3E	31	30	18	18	1	1	2	0	72.2	44.835	NaN	NaN	NaN	NaN	NaN	NaN	NaN	NaN
P10109	Adrenodoxin, mitochondrial	FDX1	1	2	0	0	1	2	0	0	16.3	26.584	0.84453	NaN	NaN	NaN	0.90425	NaN	NaN	NaN
P10155	60 kDa SS-A/Ro ribonucleoprotein	TROVE2	1	3	0	0	1	3	0	0	19	8.8799	NaN	1.2072	NaN	NaN	NaN	1.0722	NaN	NaN
P10253	Lysosomal alpha-glucosidase;76 kDa lysosomal alpha-glucosidase;70 kDa lysosomal alpha-glucosidase	GAA	1	0	0	0	1	0	0	0	1.9	4.6891	NaN	NaN	NaN	NaN	NaN	NaN	NaN	NaN
P10398	Serine/threonine-protein kinase A-Raf	ARAF	3	2	0	0	3	2	0	0	8.6	9.8852	0.89328	1.0019	NaN	NaN	1.0559	1.1753	NaN	NaN
P10412	Histone H1.4;Histone H1.3	HIST1H1E	11	14	1	1	3	4	0	0	40.2	193.03	0.67029	0.92544	0.081165	0.12479	0.94308	0.74235	0.073741	0.088599
P10515	Dihydrolipoyllysine-residue acetyltransferase component of pyruvate dehydrogenase complex, mitochondrial;Acetyltransferase component of pyruvate dehydrogenase complex	DLAT	12	12	0	0	12	12	0	0	33.8	75.133	1.0162	1.0662	NaN	NaN	1.128	0.90469	NaN	NaN
P10586	Receptor-type tyrosine-protein phosphatase F	PTPRF	15	11	0	1	13	9	0	1	11.5	49.939	1.1713	0.78684	NaN	NaN	0.92646	1.1371	NaN	NaN
P10599	Thioredoxin	TXN	10	9	1	2	10	9	1	2	66.7	183.32	0.97702	0.98792	2.8736	0.87709	1.0145	1.013	0.83787	2.3422
P10606	Cytochrome c oxidase subunit 5B, mitochondrial	COX5B	9	8	0	0	9	8	0	0	70.5	55.434	1.0784	1.097	NaN	NaN	1.0218	1.1537	NaN	NaN
X6R5C5	Carboxypeptidase;Lysosomal protective protein;Lysosomal protective protein 32 kDa chain;Lysosomal protective protein 20 kDa chain	CTSA	2	2	0	0	2	2	0	0	5	64.969	1.1349	0.96045	NaN	NaN	0.87681	1.1415	NaN	NaN
P10620	Microsomal glutathione S-transferase 1	MGST1	4	6	0	0	4	6	0	0	30.3	39.762	0.99024	0.89376	NaN	NaN	0.93452	0.99098	NaN	NaN
P10644	cAMP-dependent protein kinase type I-alpha regulatory subunit;cAMP-dependent protein kinase type I-alpha regulatory subunit, N-terminally processed	PRKAR1A	14	15	3	2	12	13	3	2	48	152.84	0.83668	1.0319	2.3488	1.0513	1.0684	0.72997	1.0679	3.7337
P10696	Alkaline phosphatase, placental-like	ALPPL2	19	19	9	10	1	0	0	0	46.1	-2	NaN	NaN	NaN	NaN	NaN	NaN	NaN	NaN	+
X6RA14	S-formylglutathione hydrolase	ESD	9	8	0	0	9	8	0	0	57.7	110.2	0.862	1.0033	NaN	NaN	1.0421	1.006	NaN	NaN
P10809	60 kDa heat shock protein, mitochondrial	HSPD1	63	60	8	10	63	60	8	10	86.2	323.31	1.0389	1.0683	1.7291	1.5016	1.0356	1.0166	1.0763	1.2278
P10909	Clusterin;Clusterin beta chain;Clusterin alpha chain;Clusterin	CLU	3	5	6	6	3	5	6	6	26.3	29.228	1.0552	0.64143	1.0306	0.62751	0.60008	0.99386	0.62701	0.9275
P11021	78 kDa glucose-regulated protein	HSPA5	45	45	8	9	44	44	8	9	60.1	323.31	0.93639	0.91568	2.0529	1.1403	0.86904	0.99114	0.87045	2.0517
P11047	Laminin subunit gamma-1	LAMC1	7	7	2	3	7	7	2	3	9.8	30.184	1.4616	1.068	1.7219	0.79839	1.0616	1.4314	0.8836	1.8494
P11137	Microtubule-associated protein 2	MAP2	0	0	2	1	0	0	2	1	7	4.8905	NaN	NaN	NaN	NaN	NaN	NaN	NaN	NaN
P11142	Heat shock cognate 71 kDa protein	HSPA8	60	61	20	26	0	0	0	0	78.8	323.31	0.98448	0.9758	3.4694	1.1003	0.958	1.0212	0.87038	3.4471
P11166	Solute carrier family 2, facilitated glucose transporter member 1	SLC2A1	5	5	3	4	5	5	3	4	11.4	20.503	1.0514	1.0785	0.97643	0.74538	0.98039	1.0352	0.90135	0.90356
Q8TDB8	Solute carrier family 2, facilitated glucose transporter member 14;Solute carrier family 2, facilitated glucose transporter member 3	SLC2A14	2	1	0	0	2	1	0	0	4.9	2.9409	1.7185	1.2096	NaN	NaN	0.73104	1.144	NaN	NaN
P11172	Uridine 5-monophosphate synthase;Orotate phosphoribosyltransferase;Orotidine 5-phosphate decarboxylase	UMPS	12	14	1	1	12	14	1	1	40	82.449	1.0597	1.1313	NaN	NaN	1.1253	1.0415	NaN	NaN
P11177	Pyruvate dehydrogenase E1 component subunit beta, mitochondrial	PDHB	13	14	0	0	13	14	0	0	56.6	124.31	1.0962	1.1987	NaN	NaN	1.0255	1.0272	NaN	NaN
P11182	Lipoamide acyltransferase component of branched-chain alpha-keto acid dehydrogenase complex, mitochondrial	DBT	4	2	0	0	4	2	0	0	13.3	4.8732	1.2155	1.2801	NaN	NaN	1.2625	1.2746	NaN	NaN
P11216	Glycogen phosphorylase, brain form	PYGB	10	9	0	0	4	2	0	0	13.5	7.0353	1.0482	1.0406	NaN	NaN	0.84938	0.98578	NaN	NaN
P11233	Ras-related protein Ral-A	RALA	6	6	0	0	3	3	0	0	29.6	31.467	1.0254	1.028	NaN	NaN	1.0006	1.0109	NaN	NaN
P11234	Ras-related protein Ral-B	RALB	4	5	0	0	1	2	0	0	24.8	4.3606	NaN	0.28838	NaN	NaN	NaN	0.35132	NaN	NaN
P11277	Spectrin beta chain, erythrocytic	SPTB	7	6	0	0	3	2	0	0	3.4	2.2231	1.1575	1.005	NaN	NaN	0.97524	1.2645	NaN	NaN
P11279	Lysosome-associated membrane glycoprotein 1	LAMP1	6	6	8	8	6	6	8	8	24.9	281.17	1.1446	0.9944	1.052	0.79783	1.1736	1.1235	0.93336	1.0167
P11387	DNA topoisomerase 1	TOP1	18	18	5	6	18	18	5	6	34	52.145	1.0334	1.0049	0.86989	0.91801	0.88579	0.86076	0.86611	1.0112
P11388	DNA topoisomerase 2-alpha	TOP2A	29	27	1	1	24	21	1	0	29.3	217.45	0.81815	1.1193	NaN	NaN	1.0482	0.77972	NaN	NaN
P11413	Glucose-6-phosphate 1-dehydrogenase	G6PD	29	24	0	2	29	24	0	2	63.5	323.31	0.99571	0.97527	NaN	1.4938	0.96847	1.0543	NaN	2.8669
P11441	Ubiquitin-like protein 4A	UBL4A	5	7	0	0	5	7	0	0	46.5	13.845	1.0331	0.68506	NaN	NaN	0.8311	1.0454	NaN	NaN
P11488	Guanine nucleotide-binding protein G(t) subunit alpha-1	GNAT1	3	3	0	2	1	1	0	1	14.3	2.0774	NaN	NaN	NaN	NaN	NaN	NaN	NaN	NaN
P11498	Pyruvate carboxylase, mitochondrial	PC	29	24	0	0	29	24	0	0	37	210.59	1.4301	1.3256	NaN	NaN	1.2625	1.2857	NaN	NaN
P11586	C-1-tetrahydrofolate synthase, cytoplasmic;Methylenetetrahydrofolate dehydrogenase;Methenyltetrahydrofolate cyclohydrolase;Formyltetrahydrofolate synthetase;C-1-tetrahydrofolate synthase, cytoplasmic, N-terminally processed	MTHFD1	46	54	11	13	46	53	11	13	65.3	323.31	0.96077	0.98481	3.4238	1.214	0.96772	0.94163	0.97407	3.0151
P11717	Cation-independent mannose-6-phosphate receptor	IGF2R	18	21	0	0	18	21	0	0	15	83.966	1.0808	0.82924	NaN	NaN	0.85324	1.0248	NaN	NaN
P11766	Alcohol dehydrogenase class-3	ADH5	14	15	0	0	14	15	0	0	36.6	151.93	1.0623	0.94512	NaN	NaN	1.0331	1.0723	NaN	NaN
P11802	Cyclin-dependent kinase 4	CDK4	5	5	1	1	4	4	0	0	29.7	32.611	1.0952	0.75076	NaN	NaN	1.044	0.85743	NaN	NaN
P11908	Ribose-phosphate pyrophosphokinase 2	PRPS2	14	13	0	1	5	5	0	0	53.1	38.857	0.91766	1.067	NaN	NaN	0.97159	1.0219	NaN	NaN
P11940	Polyadenylate-binding protein 1;Polyadenylate-binding protein	PABPC1	40	40	9	17	27	27	5	11	70.6	323.31	0.9009	0.94668	1.1612	0.93807	0.94081	0.87402	0.90934	1.077
P12004	Proliferating cell nuclear antigen	PCNA	14	14	1	3	14	14	1	3	62.1	323.31	0.93563	1.0821	NaN	1.5169	0.96901	0.90447	NaN	1.0107
P12036	Neurofilament heavy polypeptide	NEFH	4	4	0	0	3	3	0	0	7.2	9.5963	1.6147	0.89979	NaN	NaN	0.88631	1.4029	NaN	NaN
P12081	Histidine--tRNA ligase, cytoplasmic	HARS	22	20	0	0	18	15	0	0	48.7	77.223	0.95631	1.0533	NaN	NaN	1.023	0.92527	NaN	NaN
P12110	Collagen alpha-2(VI) chain	COL6A2	0	0	1	0	0	0	1	0	2.6	5.5431	NaN	NaN	NaN	NaN	NaN	NaN	NaN	NaN
P12235	ADP/ATP translocase 1	SLC25A4	24	23	1	1	5	5	0	0	65.8	17.856	1.1271	1.3374	NaN	NaN	1.0302	0.86902	NaN	NaN
P12236	ADP/ATP translocase 3;ADP/ATP translocase 3, N-terminally processed	SLC25A6	28	29	1	2	5	8	0	0	76.5	213.54	1.1136	1.1527	NaN	NaN	1.0582	1.0762	NaN	NaN
P12268	Inosine-5-monophosphate dehydrogenase 2	IMPDH2	25	25	3	4	23	23	2	3	57.2	323.31	1.0222	0.83583	3.6552	1.2951	0.83861	1.0871	0.78322	3.6072
P12270	Nucleoprotein TPR	TPR	31	36	1	0	31	36	1	0	24.4	323.31	0.85401	1.0899	NaN	NaN	0.98948	0.82719	NaN	NaN
P12277	Creatine kinase B-type	CKB	26	25	7	10	26	25	7	10	88.5	323.31	1.02	0.87282	3.7527	1.0397	0.9028	0.99812	0.80215	3.9441
P12429	Annexin A3;Annexin	ANXA3	27	27	0	0	27	27	0	0	78.9	323.31	1.0534	0.98288	NaN	NaN	1.0072	1.042	NaN	NaN
P12532	Creatine kinase U-type, mitochondrial	CKMT1A	21	19	0	0	21	19	0	0	65.2	323.31	1.1966	1.2082	NaN	NaN	1.0797	1.0577	NaN	NaN
P12814	Alpha-actinin-1	ACTN1	63	60	3	4	39	35	0	0	78.9	323.31	0.94681	1.022	NaN	NaN	1.0125	0.97655	NaN	NaN
P12882	Myosin-1;Myosin-2;Myosin-8;Myosin-4;Myosin-3	MYH1	4	1	1	0	2	0	1	0	1.8	2.6051	1.0476	NaN	NaN	NaN	0.84982	NaN	NaN	NaN
P12931	Proto-oncogene tyrosine-protein kinase Src	SRC	2	4	0	0	1	1	0	0	8.6	10.966	NaN	1.1967	NaN	NaN	NaN	1.1266	NaN	NaN
P12955	Xaa-Pro dipeptidase	PEPD	17	12	0	0	17	12	0	0	41.8	205.65	1.0093	1.0094	NaN	NaN	0.94008	1.019	NaN	NaN
P12956	X-ray repair cross-complementing protein 6	XRCC6	42	42	9	15	42	42	9	15	58.6	323.31	0.9952	1.0938	1.0933	1.2452	1.067	0.98423	1.0436	0.90441
P13010	X-ray repair cross-complementing protein 5	XRCC5	48	47	13	16	48	47	13	16	72.5	323.31	1.0393	1.1231	0.99431	1.1514	1.0664	0.99523	0.96277	0.92218
P13073	Cytochrome c oxidase subunit 4 isoform 1, mitochondrial	COX4I1	9	7	0	0	9	7	0	0	37.9	37.565	1.1077	1.031	NaN	NaN	0.96269	1.0346	NaN	NaN
P13473	Lysosome-associated membrane glycoprotein 2	LAMP2	4	3	4	5	4	3	4	5	11	12.149	1.0891	1.0814	0.98259	0.78296	1.0091	1.0248	0.91139	1.0209
P13489	Ribonuclease inhibitor	RNH1	26	25	1	3	26	25	1	3	66.6	323.31	1.0134	1.0283	3.0741	1.2026	0.99873	0.98476	0.95946	2.5666
P13639	Elongation factor 2	EEF2	81	78	33	37	80	77	32	36	77.4	323.31	0.89851	0.94994	2.931	1.1995	0.99273	0.94411	0.91496	2.885
P13667	Protein disulfide-isomerase A4	PDIA4	45	42	0	0	44	41	0	0	60.6	323.31	0.95277	1.0291	NaN	NaN	0.90001	0.84174	NaN	NaN
P13674	Prolyl 4-hydroxylase subunit alpha-1	P4HA1	4	3	0	0	4	3	0	0	12.2	23.049	0.99018	1.1206	NaN	NaN	1.2293	0.9933	NaN	NaN
P13693	Translationally-controlled tumor protein	TPT1	9	9	0	1	9	9	0	1	50.6	140.58	0.93041	0.9469	NaN	1.9029	1.0797	1.0556	NaN	2.6161
P13716	Delta-aminolevulinic acid dehydratase	ALAD	1	1	0	0	1	1	0	0	8.2	2.8966	NaN	NaN	NaN	NaN	NaN	NaN	NaN	NaN
P13726	Tissue factor	F3	2	4	0	1	2	4	0	1	21.7	17.751	1.4111	1.062	NaN	0.67031	0.71037	1.8788	NaN	1.9461
P13797	Plastin-3	PLS3	46	43	0	0	38	36	0	0	70.6	323.31	1.0841	1.0514	NaN	NaN	1.0317	1.0743	NaN	NaN
P13804	Electron transfer flavoprotein subunit alpha, mitochondrial	ETFA	16	14	0	2	16	14	0	2	63.4	323.31	0.93312	1.0109	NaN	1.6666	0.92609	0.87622	NaN	1.1471
P13807	Glycogen [starch] synthase, muscle	GYS1	8	8	0	0	8	8	0	0	22.9	37.145	1.0035	0.66806	NaN	NaN	0.87975	1.0341	NaN	NaN
P13861	cAMP-dependent protein kinase type II-alpha regulatory subunit	PRKAR2A	12	10	0	0	10	9	0	0	49	129.31	0.75128	0.97181	NaN	NaN	0.93433	0.96091	NaN	NaN
P13984	General transcription factor IIF subunit 2	GTF2F2	6	5	0	0	6	5	0	0	42.6	25.191	0.94588	1.1277	NaN	NaN	1.043	1.0024	NaN	NaN
P13995	Bifunctional methylenetetrahydrofolate dehydrogenase/cyclohydrolase, mitochondrial;NAD-dependent methylenetetrahydrofolate dehydrogenase;Methenyltetrahydrofolate cyclohydrolase	MTHFD2	5	3	0	0	5	3	0	0	35.5	24.823	1.1414	1.166	NaN	NaN	1.1139	1.1899	NaN	NaN
P14174	Macrophage migration inhibitory factor	MIF	5	4	1	1	5	4	1	1	42.6	123.35	1.0296	1.0092	NaN	NaN	1.0289	1.0202	NaN	NaN
P14324	Farnesyl pyrophosphate synthase	FDPS	14	14	0	0	14	14	0	0	36.8	323.31	0.96401	0.78316	NaN	NaN	0.79136	0.95978	NaN	NaN
P14373	Zinc finger protein RFP	TRIM27	1	1	0	0	1	1	0	0	3.4	2.2691	NaN	NaN	NaN	NaN	NaN	NaN	NaN	NaN
P14384	Carboxypeptidase M	CPM	2	3	0	1	2	3	0	1	10.6	57.454	0.83804	0.80244	NaN	0.80023	0.92353	0.98618	NaN	0.84925
P14550	Alcohol dehydrogenase [NADP(+)]	AKR1A1	11	10	0	0	11	10	0	0	48.9	247.12	1.1336	0.71201	NaN	NaN	0.72581	1.0138	NaN	NaN
P14618	Pyruvate kinase PKM;Pyruvate kinase	PKM	50	49	10	14	5	5	2	2	84.7	323.31	1.0381	0.96483	3.1797	1.4201	0.95514	1.0446	0.9522	2.4395
P14618	Pyruvate kinase PKM;Pyruvate kinase	PKM	46	45	8	12	1	1	0	0	76.6	-2	NaN	NaN	NaN	NaN	NaN	NaN	NaN	NaN	+
P14621	Acylphosphatase-2	ACYP2	1	0	0	0	1	0	0	0	24.2	-2	NaN	NaN	NaN	NaN	NaN	NaN	NaN	NaN	+
P14625	Endoplasmin	HSP90B1	49	50	20	21	41	42	16	16	55.3	323.31	0.93709	0.9997	2.9826	1.1674	0.91372	0.91437	0.84168	2.6513
P14635	G2/mitotic-specific cyclin-B1	CCNB1	3	3	0	0	3	3	0	0	11.6	4.018	1.6136	1.0596	NaN	NaN	1.0001	0.81711	NaN	NaN
P14678	Small nuclear ribonucleoprotein-associated proteins B and B	SNRPB	12	9	3	3	4	2	1	1	63.6	74.889	1.0761	1.0181	1.1807	0.95486	0.9651	0.98433	0.95734	1.0145
P14854	Cytochrome c oxidase subunit 6B1	COX6B1	7	6	0	1	7	6	0	1	90.7	102.48	1.111	1.1177	NaN	NaN	0.99528	1.0325	NaN	NaN
P14866	Heterogeneous nuclear ribonucleoprotein L	HNRNPL	31	28	19	25	3	3	2	3	80.5	323.31	1.1171	1.0374	1.1469	1.0195	0.99271	1.0938	0.94989	1.1058
P14868	Aspartate--tRNA ligase, cytoplasmic	DARS	29	30	0	2	29	30	0	2	67.9	146.04	0.97487	1.0708	NaN	1.6575	1.0702	0.93586	NaN	1.9666
P14923	Junction plakoglobin	JUP	30	26	2	2	27	23	2	2	58.5	292.29	0.99882	1.0706	1.5408	1.3424	1.0308	1.0013	0.78435	1.3486
P14927	Cytochrome b-c1 complex subunit 7	UQCRB	5	5	0	0	2	2	0	0	45.9	39.709	1.1652	1.1745	NaN	NaN	1.0443	1.0655	NaN	NaN
P15104	Glutamine synthetase	GLUL	3	4	0	0	3	4	0	0	15.8	21.533	1.0395	0.72826	NaN	NaN	0.87821	0.79772	NaN	NaN
P15121	Aldose reductase	AKR1B1	21	23	0	0	21	23	0	0	84.5	116.32	0.97566	1.0813	NaN	NaN	1.0599	0.95337	NaN	NaN
P15170	Eukaryotic peptide chain release factor GTP-binding subunit ERF3A	GSPT1	19	24	1	0	19	24	1	0	48.6	184.65	0.9226	1.0252	NaN	NaN	1.1119	0.96323	NaN	NaN
P15291	Beta-1,4-galactosyltransferase 1;Lactose synthase A protein;N-acetyllactosamine synthase;Beta-N-acetylglucosaminylglycopeptide beta-1,4-galactosyltransferase;Beta-N-acetylglucosaminyl-glycolipid beta-1,4-galactosyltransferase;Processed beta-1,4-galactosyltransferase 1	B4GALT1	5	5	0	0	5	5	0	0	27.3	19.501	0.87755	1.2954	NaN	NaN	1.0852	1.0002	NaN	NaN
P15374	Ubiquitin carboxyl-terminal hydrolase isozyme L3;Ubiquitin carboxyl-terminal hydrolase	UCHL3	7	5	0	0	7	5	0	0	36.1	32.946	0.83255	1.127	NaN	NaN	1.0376	0.82225	NaN	NaN
P15529	Membrane cofactor protein	CD46	5	3	1	3	1	0	0	1	16.7	4.1984	NaN	NaN	NaN	0.40928	NaN	NaN	NaN	1.3595
P15529	Membrane cofactor protein	CD46	5	5	2	3	1	2	1	1	17.5	23.439	1.0365	0.90524	1.1023	0.57281	0.92676	1.2113	0.98224	1.0666
P15531	Nucleoside diphosphate kinase A	NME1	15	14	0	0	2	2	0	0	90.8	183.59	1.0589	1.0629	NaN	NaN	1.0791	0.95203	NaN	NaN
P15880	40S ribosomal protein S2	RPS2	16	18	13	15	16	18	13	15	67.6	211	0.98139	0.97952	0.97639	0.76469	0.99382	0.9692	0.84984	0.87214
P15924	Desmoplakin	DSP	88	87	10	14	88	87	10	14	42.7	323.31	0.8186	0.92854	1.7863	1.341	0.9566	0.90213	0.7919	2.0478
P15927	Replication protein A 32 kDa subunit	RPA2	8	9	0	0	8	9	0	0	57	45.831	0.92648	1.0203	NaN	NaN	0.98283	0.8782	NaN	NaN
P16066	Atrial natriuretic peptide receptor 1	NPR1	2	3	0	0	2	2	0	0	4.2	7.7676	1.0836	0.46308	NaN	NaN	0.66568	0.98029	NaN	NaN
Q5TD07	Ribosyldihydronicotinamide dehydrogenase [quinone]	NQO2	5	4	0	0	5	4	0	0	50.3	44.045	0.97861	1.0522	NaN	NaN	1.1808	1.1495	NaN	NaN
P16144	Integrin beta-4	ITGB4	12	16	0	0	12	16	0	0	15.9	43.528	1.0101	0.81012	NaN	NaN	0.69516	0.86041	NaN	NaN
P16152	Carbonyl reductase [NADPH] 1	CBR1	17	19	0	1	15	17	0	1	71.1	323.31	1.0441	0.94196	NaN	NaN	0.9329	1.058	NaN	NaN
P16333	Cytoplasmic protein NCK1	NCK1	4	8	0	0	4	8	0	0	34	12.656	1.0834	1.1011	NaN	NaN	1.1677	1.0842	NaN	NaN
P16401	Histone H1.5	HIST1H1B	11	11	1	0	9	9	1	0	33.2	111.65	0.77602	0.99324	NaN	NaN	0.93451	0.786	NaN	NaN
P16403	Histone H1.2	HIST1H1C	11	13	1	1	3	3	0	0	35.2	51.221	0.54062	0.84884	NaN	NaN	0.89974	0.52823	NaN	NaN
P16435	NADPH--cytochrome P450 reductase	POR	16	13	1	1	16	13	1	1	30.4	80.332	1.0685	1.1362	NaN	NaN	1.0719	1.055	NaN	NaN
P16615	Sarcoplasmic/endoplasmic reticulum calcium ATPase 2	ATP2A2	35	34	4	3	30	28	3	3	39.8	323.31	0.98165	0.92778	2.4674	1.2536	0.94888	1.035	0.72606	2.7845
P16930	Fumarylacetoacetase	FAH	4	4	0	0	4	4	0	0	23.6	18.721	0.94845	0.81197	NaN	NaN	0.72199	0.83664	NaN	NaN
P16949	Stathmin	STMN1	9	10	0	0	7	7	0	0	45	189.29	0.95393	0.92469	NaN	NaN	0.90596	0.88483	NaN	NaN
P16989	Y-box-binding protein 3	YBX3	17	18	8	8	10	11	4	4	63.4	223.84	0.84842	0.81817	0.67562	0.58672	0.9466	0.96947	0.8602	0.88259
P17028	Zinc finger protein 24	ZNF24	1	3	0	0	1	3	0	0	9.8	3.2419	NaN	1.2614	NaN	NaN	NaN	1.2939	NaN	NaN
P17066	Heat shock 70 kDa protein 6	HSPA6	15	15	5	7	3	3	1	1	19.4	151.08	0.95223	0.90807	3.2265	1.1368	68.943	0.91351	0.79424	3.2389
P17096	High mobility group protein HMG-I/HMG-Y	HMGA1	5	4	0	0	2	2	0	0	55.1	134.22	1.0401	0.84377	NaN	NaN	0.97266	1.0484	NaN	NaN
P17096	High mobility group protein HMG-I/HMG-Y	HMGA1	4	3	0	0	1	1	0	0	50	8.5097	NaN	NaN	NaN	NaN	NaN	NaN	NaN	NaN
P17152	Transmembrane protein 11, mitochondrial	TMEM11	1	2	0	0	1	2	0	0	13	2.8965	NaN	1.1703	NaN	NaN	NaN	1.1029	NaN	NaN
P17174	Aspartate aminotransferase, cytoplasmic	GOT1	16	16	0	0	2	2	0	0	58.4	183.49	0.84444	0.88393	NaN	NaN	0.87451	0.81947	NaN	NaN
P17535	Transcription factor jun-D	JUND	2	2	0	0	2	2	0	0	12.1	6.1555	NaN	NaN	NaN	NaN	NaN	NaN	NaN	NaN
P17544	Cyclic AMP-dependent transcription factor ATF-7	ATF7	0	1	0	0	0	1	0	0	7.2	5.6276	NaN	NaN	NaN	NaN	NaN	NaN	NaN	NaN
P17568	NADH dehydrogenase [ubiquinone] 1 beta subcomplex subunit 7	NDUFB7	1	1	0	0	1	1	0	0	7.3	2.4395	NaN	NaN	NaN	NaN	NaN	NaN	NaN	NaN
P17612	cAMP-dependent protein kinase catalytic subunit alpha	PRKACA	11	8	0	0	3	2	0	0	37.6	37.297	0.83532	1.0394	NaN	NaN	1.0548	0.74578	NaN	NaN
P17655	Calpain-2 catalytic subunit	CAPN2	15	18	1	0	15	18	1	0	34.9	113.27	0.98646	1.0284	NaN	NaN	0.98643	1.0287	NaN	NaN
P17676	CCAAT/enhancer-binding protein beta	CEBPB	1	2	0	0	0	1	0	0	10.9	4.9773	NaN	0.93023	NaN	NaN	NaN	1.0425	NaN	NaN
P17844	Probable ATP-dependent RNA helicase DDX5	DDX5	40	39	34	34	29	28	23	23	62.5	323.31	0.78086	1.0217	0.84369	1.0938	1.0035	0.79256	1.0012	0.76104
P17858	ATP-dependent 6-phosphofructokinase, liver type	PFKL	12	14	0	0	9	10	0	0	29.6	110.14	0.88382	0.7999	NaN	NaN	0.83011	0.97099	NaN	NaN
P17931	Galectin-3;Galectin	LGALS3	10	11	0	0	10	11	0	0	44	75.184	1.0431	0.94497	NaN	NaN	1.0276	1.1521	NaN	NaN
P17980	26S protease regulatory subunit 6A	PSMC3	22	21	0	1	1	1	0	0	71.3	3.1326	0.89393	NaN	NaN	NaN	1.1212	NaN	NaN	NaN
P17987	T-complex protein 1 subunit alpha	TCP1	35	36	7	9	35	36	7	9	82.2	323.31	0.93742	1.0358	2.7292	1.2148	1.033	0.98621	1.0724	2.9493
P18031	Tyrosine-protein phosphatase non-receptor type 1;Tyrosine-protein phosphatase non-receptor type	PTPN1	4	5	0	0	4	5	0	0	27.6	20.244	1.1581	1.3054	NaN	NaN	1.1331	0.92648	NaN	NaN
P18077	60S ribosomal protein L35a	RPL35A	10	9	0	0	10	9	0	0	49.1	126.59	1.0004	0.99924	NaN	NaN	0.98443	0.96878	NaN	NaN
P18085	ADP-ribosylation factor 4	ARF4	13	12	0	0	8	7	0	0	65.6	90.333	1.0212	0.90932	NaN	NaN	0.90631	0.95077	NaN	NaN
P18124	60S ribosomal protein L7	RPL7	14	15	2	3	14	15	2	3	52.8	155.4	0.92442	1.0143	1.2282	1.0383	0.95533	1.0117	0.87435	1.1067
P18206	Vinculin	VCL	48	49	1	1	48	49	1	1	63	323.31	1.1034	0.96007	NaN	NaN	0.9999	1.1258	NaN	NaN
P18583	Protein SON	SON	11	12	11	9	11	12	11	9	12.5	39.985	0.84641	1.1772	0.78343	1.1764	1.0816	0.91846	1.0032	0.78461
P18615	Negative elongation factor E	NELFE	5	8	0	0	5	8	0	0	37.6	23.542	0.91278	0.93642	NaN	NaN	0.80628	0.97906	NaN	NaN
P18669	Phosphoglycerate mutase 1	PGAM1	19	18	1	3	19	18	1	3	78	323.31	0.98604	1.0329	NaN	0.82102	1.0301	0.95441	NaN	3.0069
P18754	Regulator of chromosome condensation	RCC1	15	16	0	0	15	16	0	0	53.9	275.35	1.104	1.0327	NaN	NaN	1.0095	1.0685	NaN	NaN
P18827	Syndecan-1	SDC1	0	0	2	3	0	0	2	3	11.9	10.862	NaN	NaN	0.87352	0.63676	NaN	NaN	0.93226	0.94972
P18846	Cyclic AMP-dependent transcription factor ATF-1;Cyclic AMP-responsive element-binding protein 1	ATF1	2	3	0	0	2	3	0	0	30.9	6.4815	1.3725	1.2041	NaN	NaN	1.1867	1.2811	NaN	NaN
P18858	DNA ligase 1;DNA ligase	LIG1	5	4	0	0	5	4	0	0	8	10.626	0.60703	0.70902	NaN	NaN	0.75425	0.4802	NaN	NaN
P18859	ATP synthase-coupling factor 6, mitochondrial	ATP5J	5	5	0	0	5	5	0	0	45.4	191.46	1.0157	1.042	NaN	NaN	1.007	1.0946	NaN	NaN
P18887	DNA repair protein XRCC1	XRCC1	7	7	0	0	7	7	0	0	16.3	15.259	0.83823	1.1007	NaN	NaN	0.99622	0.77726	NaN	NaN
P19022	Cadherin-2;Cadherin-4	CDH2	2	1	0	0	2	1	0	0	3.3	2.8806	NaN	NaN	NaN	NaN	NaN	NaN	NaN	NaN
P19075	Tetraspanin-8	TSPAN8	1	1	0	0	1	1	0	0	4.2	2.6258	NaN	NaN	NaN	NaN	NaN	NaN	NaN	NaN
P19174	1-phosphatidylinositol 4,5-bisphosphate phosphodiesterase gamma-1	PLCG1	5	5	0	0	5	5	0	0	7.9	12.754	0.73733	0.71953	NaN	NaN	0.69164	0.68668	NaN	NaN
P19338	Nucleolin	NCL	41	42	45	45	41	42	45	45	46.5	323.31	1.1108	1.0845	1.0987	0.96371	1.0487	1.108	1.0153	1.1072
P19367	Hexokinase-1	HK1	12	10	0	0	10	8	0	0	13.8	52.961	1.2184	1.1637	NaN	NaN	1.0016	0.99181	NaN	NaN
P19387	DNA-directed RNA polymerase II subunit RPB3	POLR2C	7	6	0	0	7	6	0	0	51.6	32.834	0.92364	1.0511	NaN	NaN	0.87518	0.8548	NaN	NaN
P19474	E3 ubiquitin-protein ligase TRIM21	TRIM21	1	4	0	0	1	4	0	0	10.7	4.0478	NaN	0.92758	NaN	NaN	NaN	0.72068	NaN	NaN
P19525	Interferon-induced, double-stranded RNA-activated protein kinase	EIF2AK2	9	8	0	0	9	8	0	0	25.7	27.548	0.86049	1.1582	NaN	NaN	1.1244	0.85969	NaN	NaN
P19623	Spermidine synthase	SRM	14	13	0	3	14	13	0	3	61.6	113.14	0.96316	0.94129	NaN	1.6462	1.0703	1.0443	NaN	2.8851
P19784	Casein kinase II subunit alpha	CSNK2A2	8	7	1	1	8	7	1	1	36.3	73.554	1.0146	1.0935	NaN	NaN	1.0037	1.1795	NaN	NaN
P20020	Plasma membrane calcium-transporting ATPase 1;Calcium-transporting ATPase	ATP2B1	20	19	0	0	11	11	0	0	26.6	175.56	1.1052	0.9876	NaN	NaN	1.0154	1.1074	NaN	NaN
P20042	Eukaryotic translation initiation factor 2 subunit 2	EIF2S2	22	20	2	2	22	20	2	2	61.3	323.31	0.9974	1.0214	2.5007	1.356	1.0227	0.95053	0.96611	2.3595
P20073	Annexin A7	ANXA7	20	19	0	0	19	19	0	0	46.8	210.68	0.97692	1.1338	NaN	NaN	0.92368	0.94603	NaN	NaN
P20248	Cyclin-A2	CCNA2	1	2	0	0	1	2	0	0	9.3	2.5337	NaN	NaN	NaN	NaN	NaN	NaN	NaN	NaN
P20290	Transcription factor BTF3	BTF3	11	11	0	0	11	11	0	0	75.9	323.31	1.0208	1.0235	NaN	NaN	1.038	0.98545	NaN	NaN
P20339	Ras-related protein Rab-5A	RAB5A	6	6	0	0	3	3	0	0	51.7	16.978	1.1862	0.79737	NaN	NaN	0.75515	1.1002	NaN	NaN
P20340	Ras-related protein Rab-6A	RAB6A	12	14	1	1	11	13	0	0	70.2	210.68	0.91179	1.0256	NaN	1.2581	0.89537	0.90845	NaN	2.8176
P20618	Proteasome subunit beta type-1	PSMB1	10	10	0	0	10	10	0	0	66.4	256.05	0.98	1.0404	NaN	NaN	1.0285	1.0319	NaN	NaN
P20645	Cation-dependent mannose-6-phosphate receptor	M6PR	6	5	5	5	6	5	5	5	25.3	33.106	1.1504	1.0963	1.0479	0.69019	1.0714	1.0533	0.91887	1.0561
P20674	Cytochrome c oxidase subunit 5A, mitochondrial	COX5A	9	9	0	0	9	9	0	0	58	155.97	1.0603	1.0807	NaN	NaN	1.0066	0.99526	NaN	NaN
P20700	Lamin-B1	LMNB1	45	42	5	5	43	40	4	4	69.6	323.31	0.93444	1.1228	1.0956	1.3187	1.0429	0.88367	1.0598	0.96575
P20719	Homeobox protein Hox-A5	HOXA5	1	0	0	0	1	0	0	0	7.8	4.9886	NaN	NaN	NaN	NaN	NaN	NaN	NaN	NaN
P20839	Inosine-5-monophosphate dehydrogenase 1;Inosine-5-monophosphate dehydrogenase	IMPDH1	12	14	1	1	10	12	0	0	32.1	94.469	0.91294	0.96046	NaN	NaN	0.92265	0.92759	NaN	NaN
P20962	Parathymosin	PTMS	3	3	0	0	3	3	0	0	22.5	25.002	0.79081	0.98116	NaN	NaN	0.9209	0.75898	NaN	NaN
Q5QPR3	Cyclin-dependent kinase 11B	CDK11A	10	9	2	2	0	0	1	1	18.9	32.07	1.0649	1.044	NaN	0.6429	0.98424	1.074	NaN	0.78067
P21266	Glutathione S-transferase Mu 3	GSTM3	18	16	2	5	17	15	2	4	72.9	284.67	0.93535	0.84585	2.8758	1.3876	0.88909	0.9828	0.74738	2.7068
P21281	V-type proton ATPase subunit B, brain isoform	ATP6V1B2	14	14	0	0	9	9	0	0	44	116.26	1.0267	0.9439	NaN	NaN	1.041	1.0647	NaN	NaN
P21283	V-type proton ATPase subunit C 1	ATP6V1C1	6	7	0	0	6	7	0	0	25.7	49.41	1.0516	0.98522	NaN	NaN	0.96408	0.98717	NaN	NaN
P21291	Cysteine and glycine-rich protein 1	CSRP1	12	11	2	2	12	11	2	2	64.8	258.63	1.058	0.99741	2.7104	0.42499	1.0412	1.0416	0.80668	1.5004
P21333	Filamin-A	FLNA	143	139	28	34	128	126	24	29	68.3	323.31	0.86913	0.8523	1.9323	1.1401	0.89979	0.92876	0.84306	2.1497
P21399	Cytoplasmic aconitate hydratase	ACO1	19	19	0	0	19	19	0	0	37.8	87.773	1.1563	1.0251	NaN	NaN	1.0669	1.0664	NaN	NaN
P21796	Voltage-dependent anion-selective channel protein 1	VDAC1	22	20	0	0	22	20	0	0	89	300.86	1.0845	1.1025	NaN	NaN	1.031	1.0208	NaN	NaN
P21964	Catechol O-methyltransferase	COMT	10	12	0	0	10	12	0	0	66.1	98.229	1.1844	1.1424	NaN	NaN	1.0066	1.1586	NaN	NaN
P22033	Methylmalonyl-CoA mutase, mitochondrial	MUT	3	3	1	0	3	3	1	0	10	13.352	0.67629	0.95072	NaN	NaN	1.1124	0.60596	NaN	NaN
P22059	Oxysterol-binding protein 1	OSBP	12	12	0	0	12	12	0	0	24.3	76.15	0.90651	1.0353	NaN	NaN	0.90426	0.86965	NaN	NaN
P22087	rRNA 2-O-methyltransferase fibrillarin	FBL	9	10	7	7	8	9	6	6	52	67.966	0.94716	0.89291	1.1192	1.0076	0.96289	0.97102	0.93842	1.0948
P22102	Trifunctional purine biosynthetic protein adenosine-3;Phosphoribosylamine--glycine ligase;Phosphoribosylformylglycinamidine cyclo-ligase;Phosphoribosylglycinamide formyltransferase	GART	32	36	1	6	32	36	1	6	53.6	323.31	0.95922	0.93925	NaN	1.2899	0.9351	0.99945	NaN	2.6367
P22234	Multifunctional protein ADE2;Phosphoribosylaminoimidazole-succinocarboxamide synthase;Phosphoribosylaminoimidazole carboxylase	PAICS	29	28	1	2	29	28	1	2	58.6	323.31	0.96694	0.9785	NaN	1.2362	0.9963	1.0123	NaN	2.1651
P22307	Non-specific lipid-transfer protein	SCP2	17	18	0	0	17	18	0	0	46.6	173.65	1.0117	1.0881	NaN	NaN	1.1046	1.0179	NaN	NaN
P22314	Ubiquitin-like modifier-activating enzyme 1	UBA1	55	56	14	21	55	56	14	21	69.5	323.31	1.0085	0.96777	3.4925	1.2106	0.92636	0.96196	0.86168	3.3398
Q32Q12	Nucleoside diphosphate kinase;Nucleoside diphosphate kinase B	NME1-NME2	21	20	0	0	8	8	0	0	81.5	242.61	0.97909	0.97745	NaN	NaN	1.054	0.97691	NaN	NaN
P22570	NADPH:adrenodoxin oxidoreductase, mitochondrial	FDXR	3	5	0	0	3	5	0	0	16.1	12.597	1.0302	0.78378	NaN	NaN	0.6662	0.80506	NaN	NaN
P22612	cAMP-dependent protein kinase catalytic subunit gamma	PRKACG	4	3	0	0	2	1	0	0	18.5	7.9277	1.8779	NaN	NaN	NaN	1.5827	NaN	NaN	NaN
P22626	Heterogeneous nuclear ribonucleoproteins A2/B1	HNRNPA2B1	33	36	31	30	32	35	30	29	76.2	323.31	0.93506	1.1356	0.97657	1.0895	1.0962	0.94612	1.0605	0.93749
P22695	Cytochrome b-c1 complex subunit 2, mitochondrial	UQCRC2	15	17	0	0	15	17	0	0	49.4	323.31	1.1961	1.1179	NaN	NaN	1.0473	1.0348	NaN	NaN
P23229	Integrin alpha-6;Integrin alpha-6 heavy chain;Integrin alpha-6 light chain;Processed integrin alpha-6	ITGA6	11	10	0	0	11	10	0	0	17.6	35.416	1.2879	1.3492	NaN	NaN	1.1135	1.1383	NaN	NaN
P23246	Splicing factor, proline- and glutamine-rich	SFPQ	33	31	29	32	31	29	28	31	50.4	323.31	1.0174	1.0898	0.88613	0.99063	1.0084	0.95114	0.99378	0.89687
P23258	Tubulin gamma-1 chain;Tubulin gamma-2 chain	TUBG1	13	11	0	0	13	11	0	0	51.4	189.54	0.75469	0.96461	NaN	NaN	0.94612	0.70694	NaN	NaN
P23284	Peptidyl-prolyl cis-trans isomerase B	PPIB	22	21	0	1	22	21	0	1	64.8	323.31	1.0113	1.0534	NaN	NaN	0.99618	1.0167	NaN	NaN
P23378	Glycine dehydrogenase (decarboxylating), mitochondrial	GLDC	4	6	0	0	4	6	0	0	11.4	12.743	0.64015	1.0204	NaN	NaN	0.65117	1.1901	NaN	NaN
P23381	Tryptophan--tRNA ligase, cytoplasmic;T1-TrpRS;T2-TrpRS	WARS	22	21	0	1	22	21	0	1	69.2	323.31	1.0292	1.0327	NaN	NaN	0.98442	0.94274	NaN	NaN
P23396	40S ribosomal protein S3	RPS3	26	25	3	8	26	25	3	8	86.8	302.85	0.96252	0.96611	1.2909	1.1024	0.99443	0.99836	0.91196	1.2782
P23497	Nuclear autoantigen Sp-100	SP100	3	3	1	1	2	1	0	0	3.3	2.2525	NaN	NaN	NaN	NaN	NaN	NaN	NaN	NaN
P23511	Nuclear transcription factor Y subunit alpha	NFYA	1	1	0	0	1	1	0	0	6	3.6686	0.14225	NaN	NaN	NaN	0.10298	NaN	NaN	NaN
P23526	Adenosylhomocysteinase	AHCY	28	29	0	1	28	29	0	1	49.8	323.31	0.95866	1.0068	NaN	NaN	1.0275	0.99193	NaN	NaN
Q16778	Histone H2B type 2-E;Histone H2B type 1-B;Histone H2B type 1-O;Histone H2B type 1-J	HIST2H2BE	11	12	7	6	0	0	0	0	66.7	19.097	0.8343	0.99621	NaN	NaN	0.94153	0.79823	NaN	NaN
P23528	Cofilin-1	CFL1	24	21	9	8	18	16	5	5	91	323.31	0.96033	1.0335	3.2511	1.3618	1.0113	0.98256	0.96709	2.8919
P23634	Plasma membrane calcium-transporting ATPase 4	ATP2B4	15	12	0	0	6	4	0	0	20.5	12.092	1.0593	0.84191	NaN	NaN	0.94606	1.2052	NaN	NaN
P23919	Thymidylate kinase	DTYMK	13	14	0	0	13	14	0	0	54.7	36.638	0.79088	1.049	NaN	NaN	0.95311	0.83756	NaN	NaN
P23921	Ribonucleoside-diphosphate reductase large subunit	RRM1	31	31	0	0	31	31	0	0	53.4	279.22	0.90202	1.0228	NaN	NaN	1.059	0.85896	NaN	NaN
P24534	Elongation factor 1-beta	EEF1B2	15	15	2	1	13	13	2	1	73.8	323.31	0.93567	0.92367	NaN	0.93207	0.97455	0.99822	NaN	2.6997
P24539	ATP synthase F(0) complex subunit B1, mitochondrial	ATP5F1	12	10	0	0	12	10	0	0	46.5	323.31	1.0888	1.0917	NaN	NaN	1.0452	1.0087	NaN	NaN
P24666	Low molecular weight phosphotyrosine protein phosphatase	ACP1	10	12	1	3	10	12	1	3	74.1	223.18	1.0923	0.98884	NaN	1.4079	1.0987	1.0239	NaN	1.938
P24752	Acetyl-CoA acetyltransferase, mitochondrial	ACAT1	20	21	0	1	6	6	0	0	61.4	323.31	1.1087	1.1685	NaN	NaN	1.0982	1.0242	NaN	NaN
P25205	DNA replication licensing factor MCM3	MCM3	46	44	2	3	46	44	2	3	66.5	323.31	1.0588	1.0317	2.003	2.1543	1.0433	0.95653	1.2705	1.1724
P25325	3-mercaptopyruvate sulfurtransferase;Sulfurtransferase	MPST	7	7	0	0	7	7	0	0	35.4	110.49	0.85272	0.96344	NaN	NaN	0.76151	0.82629	NaN	NaN
P25398	40S ribosomal protein S12	RPS12	12	10	4	4	12	10	4	4	84.1	323.31	0.98177	1.0108	2.3678	1.2579	1.0356	1.0195	0.90252	1.8679
P25685	DnaJ homolog subfamily B member 1	DNAJB1	12	11	1	1	11	10	1	1	37.6	159.24	0.95346	0.92904	2.0914	NaN	0.98577	1.0486	1.0095	NaN
P25705	ATP synthase subunit alpha, mitochondrial	ATP5A1	39	40	5	6	39	40	5	6	66	323.31	1.0769	1.0692	1.9153	1.8486	1.0363	1.026	1.1094	1.2497
P25786	Proteasome subunit alpha type-1	PSMA1	20	20	0	0	20	20	0	0	85.6	323.31	0.99223	1.0431	NaN	NaN	1.014	1.0009	NaN	NaN
P25788	Proteasome subunit alpha type-3	PSMA3	15	14	0	0	15	14	0	0	58.9	98.686	0.96736	1.02	NaN	NaN	1.0963	0.99214	NaN	NaN
P25789	Proteasome subunit alpha type-4;Proteasome subunit alpha type;Proteasome subunit beta type	PSMA4	12	13	2	2	12	13	2	2	60.2	179.5	0.97486	0.99252	0.83741	0.12277	1.0549	0.98605	0.81447	0.16442
P25815	Protein S100-P	S100P	2	4	0	0	2	4	0	0	46.3	58.991	1.4022	0.95198	NaN	NaN	0.82729	1.2226	NaN	NaN
P26006	Integrin alpha-3;Integrin alpha-3 heavy chain;Integrin alpha-3 light chain	ITGA3	11	12	3	6	11	12	3	6	14.8	32.165	1.0607	0.64961	1.0798	0.56012	0.83797	1.0887	0.63725	1.12
P26038	Moesin	MSN	46	48	0	3	35	36	0	0	74.9	323.31	1.0171	0.97022	NaN	0.79424	0.99101	1.0343	NaN	1.7516
P26196	Probable ATP-dependent RNA helicase DDX6	DDX6	18	15	0	0	18	15	0	0	54.5	134.89	0.96658	0.99932	NaN	NaN	1.0275	0.99344	NaN	NaN
P26232	Catenin alpha-2	CTNNA2	9	7	0	0	1	1	0	0	11.8	26.378	NaN	1.0507	NaN	NaN	NaN	1.0093	NaN	NaN
P26358	DNA (cytosine-5)-methyltransferase 1	DNMT1	18	16	0	0	18	16	0	0	15.5	50.611	0.54206	0.80946	NaN	NaN	0.90535	0.53225	NaN	NaN
P26368	Splicing factor U2AF 65 kDa subunit	U2AF2	17	16	15	17	17	16	15	17	55.2	323.31	1.0639	1.087	0.98853	0.93623	1.059	0.96944	1.0687	1.0256
P26373	60S ribosomal protein L13	RPL13	14	15	3	5	14	15	3	5	52.1	307.67	0.96452	0.99046	1.7277	1.3193	1.0021	0.98708	1.1868	1.2442
P26374	Rab proteins geranylgeranyltransferase component A 2	CHML	0	2	0	0	0	2	0	0	5.3	4.4232	NaN	1.0303	NaN	NaN	NaN	1.8193	NaN	NaN
P26447	Protein S100-A4	S100A4	8	7	0	3	8	7	0	3	49.5	36.398	1.0689	0.88861	NaN	1.4377	0.87509	1.1116	NaN	2.9397
P26583	High mobility group protein B2	HMGB2	11	10	1	2	9	8	0	0	46.4	40.788	1.0288	1.323	NaN	NaN	1.0849	1.0111	NaN	NaN
[truncated: 2,635 more rows]

## Sheet: Significantly regulated WCE
Protein IDs	Protein names	Gene names	Ratio M/L WCE FWD	LOG2	Modulation	Ratio H/L WCE REV	LOG2	Modulation	Ratio M/L WCE REV	LOG2	Modulation	Ratio H/L WCE FWD	LOG2	Modulation
A0A024QZP7	Cyclin-dependent kinase 1	CDC2	0.80334	-0.315917	-1	0.71543	-0.483117	-1	0.92873	-0.106669	0	0.91168	-0.133401	-1
A0A024R4E5	Vigilin	HDLBP	0.87214	-0.197368	0	0.83211	-0.265154	-1	0.87264	-0.196541	-1	0.87674	-0.189779	-1			MS023 FWD	MS023 REV	GSK FWD	GSK REV
A0A024RA52	Proteasome subunit alpha type;Proteasome subunit alpha type-2	PSMA2	0.9836	-0.0238564	0	0.98671	-0.019302	0	1.0291	0.0413832	0	1.0592	0.082975	-1		average	-0.0256746	-0.03908	-0.0209252	-0.00366812
A0A024RCR6	Large proline-rich protein BAG6	BAT3	0.99387	-0.00887094	0	1.056	0.0786098	0	0.94587	-0.0802862	0	1.0399	0.0564448	-1		ST	0.217081	0.223087	0.215272	0.178658
A0A075B6F9	Nitric oxide synthase-interacting protein	NOSIP	0.79726	-0.326878	-1	0.87313	-0.195732	0	0.73195	-0.450183	-1	0.9146	-0.128787	-1		Upreguation(+1ST)	0.191406	0.184007	0.194347	0.17499
F8W809	Thioredoxin reductase 1, cytoplasmic	TXNRD1	1.0256	0.0364682	0	1.1141	0.155879	0	0.97699	-0.0335843	0	1.0782	0.108625	-1		Downregulation(-1ST)	-0.242755	-0.262167	-0.236197	-0.182327
A0A087WT44	Heme oxygenase 2	HMOX2	0.9479	-0.0771932	0	0.89316	-0.163009	0	1.0919	0.126841	0	0.96399	-0.0529099	-1
A0A087WTV6	Pyrroline-5-carboxylate reductase 2;Pyrroline-5-carboxylate reductase	PYCR2	0.633	-0.659723	-1	0.83244	-0.264582	-1	0.93359	-0.099139	0	0.94012	-0.0890832	-1
A0A087WVR3	E3 ubiquitin-protein ligase UHRF1	UHRF1	1.0635	0.08882	0	0.92766	-0.108332	0	0.89346	-0.162525	0	0.95125	-0.0721035	-1
A0A087WUL4	Retrotransposon-derived protein PEG10	PEG10	1.1737	0.231064	1	1.2567	0.32964	1	0.83578	-0.258805	-1	0.78764	-0.344392	0				Modulation
A0A087WUN7	SRA stem-loop-interacting RNA-binding protein, mitochondrial	SLIRP	0.77438	-0.368886	-1	0.84538	-0.242328	0	0.99157	-0.0122135	0	0.99782	-0.00314851	-1				1	Up-regulated
A0A087WUQ6	Glutathione peroxidase;Glutathione peroxidase 1	GPX1	0.96502	-0.0513693	0	1.0325	0.0461418	0	0.91809	-0.123293	0	0.91544	-0.127463	-1				0	No modulated
A0A087WUT6	Eukaryotic translation initiation factor 5B	EIF5B	1.0014	0.00201836	0	0.94474	-0.0820108	0	1.0599	0.0839282	0	1.0342	0.0485152	-1				-1	Down-regulated
A0A087X0G7	NF-kappa-B essential modulator	IKBKG	0.93913	-0.0906032	0	0.91146	-0.133749	0	0.88667	-0.173531	0	0.90463	-0.1446	-1
A0A087WV29	N-acetyltransferase 10	NAT10	1.1421	0.191689	1	1.0228	0.0325241	0	0.82843	-0.271548	-1	1.1042	0.143002	-1
A0A087WVQ6	Clathrin heavy chain;Clathrin heavy chain 1	CLTC	0.95098	-0.0725131	0	0.93196	-0.10166	0	1.005	0.0071955	0	1.0041	0.00590296	-1
A0A087WVZ9	DNA-directed RNA polymerases I, II, and III subunit RPABC1	POLR2E	0.95039	-0.0734084	0	0.94114	-0.0875187	0	1.0027	0.00389003	0	0.97935	-0.0301036	-1
A0A087WW40	Endophilin-B1	SH3GLB1	1.145	0.195348	1	1.0167	0.023894	0	1.0502	0.0706641	0	0.94819	-0.0767519	-1
A0A087WWF6	DNA polymerase delta subunit 2	POLD2	1.0537	0.0754642	0	1.0073	0.0104934	0	0.84495	-0.243062	-1	0.85995	-0.217675	-1
A0A087WXM6	60S ribosomal protein L17	RPL17	0.97703	-0.0335252	0	0.96174	-0.0562812	0	0.94061	-0.0883314	0	1.0189	0.0270125	-1
A0A087WXM8	Basal cell adhesion molecule	BCAM	1.3325	0.414136	1	1.2899	0.367259	1	0.67407	-0.56903	-1	0.77445	-0.368756	0
A0A087WY55	Vacuolar protein sorting-associated protein VTA1 homolog	VTA1	0.9104	-0.135428	0	0.95691	-0.0635449	0	0.97794	-0.0321821	0	1.1036	0.142217	-1
A0A087WY71	AP-2 complex subunit mu	AP2M1	0.84509	-0.242823	-1	0.81226	-0.299986	-1	0.96864	-0.0459675	0	0.87643	-0.190289	-1
A0A087WYF8	PDZ and LIM domain protein 3	PDLIM3	0.80474	-0.313405	-1	0.64241	-0.638434	-1	1.1069	0.146525	0	0.81868	-0.288628	0
A0A087WYT3	Prostaglandin E synthase 3	PTGES3	0.94481	-0.0819039	0	0.97353	-0.0387027	0	1.0206	0.0294175	0	1.0503	0.0708015	-1
A0A087WZ13	Ribonucleoprotein PTB-binding 1	RAVER1	1.0836	0.115832	0	0.93055	-0.103844	0	1.2287	0.297133	1	1.2606	0.334111	1
A0A087WZK9	Eukaryotic translation initiation factor 3 subunit H	EIF3H	1.1394	0.188274	0	0.94027	-0.088853	0	1.0567	0.0795658	0	0.98298	-0.024766	-1
A0A087X020	Ribosome maturation protein SBDS	SBDS	0.97096	-0.0425162	0	0.94938	-0.0749424	0	0.95291	-0.0695881	0	0.94288	-0.0848539	-1
A0A087X0K9	Tight junction protein ZO-1	TJP1	1.0744	0.103531	0	1.1438	0.193835	1	0.90373	-0.146036	0	0.93998	-0.089298	-1
A0A087X0R6	Sorting nexin-12	SNX12	0.9845	-0.0225369	0	0.86668	-0.206429	0	0.9101	-0.135903	0	1.0135	0.0193461	-1
A0A087X1G7	15 kDa selenoprotein	2015-09-01	0.88405	-0.1778	0	0.89909	-0.153463	0	1.0189	0.0270125	0	0.84001	-0.251522	0
A0A087X1Z3	Proteasome activator complex subunit 2	PSME2	1.0052	0.00748258	0	0.93932	-0.0903114	0	0.98192	-0.0263226	0	0.97573	-0.0354461	-1
A0A087X2I1	26S protease regulatory subunit 10B	PSMC6	1.0374	0.0529723	0	0.98196	-0.0262638	0	1.028	0.0398403	0	1.0648	0.0905825	-1
A0A096LPI6		C21orf33	0.59392	-0.751659	-1	0.60167	-0.732956	-1	0.93999	-0.0892827	0	0.85163	-0.231701	-1
A0A0A0MR02	Voltage-dependent anion-selective channel protein 2	VDAC2	1.1218	0.165815	0	1.1015	0.139469	0	1.1814	0.240498	1	1.0928	0.128029	-1
Q5T092	Protein RER1	RER1	0.89206	-0.164787	0	0.84995	-0.23455	0	0.86847	-0.203452	-1	0.91984	-0.120545	-1
A0A0A0MRJ6	Protein-L-isoaspartate O-methyltransferase;Protein-L-isoaspartate(D-aspartate) O-methyltransferase	PCMT1	0.88521	-0.175908	0	0.89089	-0.166681	0	1.0403	0.0569996	0	1.0377	0.0533894	-1
A0A0A0MS51	Gelsolin	GSN	1.0552	0.0775165	0	1.1097	0.15017	0	0.92427	-0.113614	0	0.80851	-0.306662	0
A0A0A0MSE2	Hydroxyacyl-coenzyme A dehydrogenase, mitochondrial	HADH	0.51243	-0.964573	-1	0.43644	-1.19614	-1	1.2658	0.340049	1	1.0608	0.0851527	-1
A0A0A0MSS8	Aldo-keto reductase family 1 member C3	AKR1C3	0.73811	-0.438092	-1	0.83241	-0.264634	-1	1.0021	0.00302648	0	1.0026	0.00374614	-1
A0A0A0MSW4	Phosphatidylinositol transfer protein beta isoform	PITPNB	1.1554	0.208392	1	1.1433	0.193204	1	1.1507	0.202512	1	1.1689	0.225152	1
A0A0A0MTB8	WD repeat-containing protein 36	WDR36	0.8984	-0.15457	0	1.0318	0.0451634	0	1.0494	0.0695647	0	0.97976	-0.0294997	-1
A0A0A0MTH3	Integrin-linked protein kinase	ILK	0.84189	-0.248296	-1	0.93196	-0.10166	0	1.0518	0.0728604	0	0.95961	-0.0594799	-1
A0A0R4J2G3	Neutral cholesterol ester hydrolase 1	NCEH1	1.0086	0.0123541	0	1.0819	0.113567	0	0.92597	-0.110963	0	0.94919	-0.0752312	-1
A0A0A6YYA0	Transmembrane emp24 domain-containing protein 7	TMED7-TICAM2	0.9889	-0.0161035	0	1.0029	0.00417776	0	1.0025	0.00360224	0	0.84894	-0.236266	0
A0A0B4J2E5	Periodic tryptophan protein 2 homolog	PWP2	0.95648	-0.0641933	0	0.83159	-0.266056	-1	1.1391	0.187894	1	0.96054	-0.0580824	-1
A0A0C4DFL7	Lanosterol 14-alpha demethylase	CYP51A1	2.2893	1.19491	1	2.2026	1.13921	1	1.059	0.0827026	0	1.0672	0.0938306	-1
C9J9K3	40S ribosomal protein SA	RPSA	0.92729	-0.108907	0	1.007	0.0100637	0	0.96252	-0.0551116	0	0.99814	-0.00268591	-1
A0A0C4DG44	Serine protease HTRA2, mitochondrial	HTRA2	0.6628	-0.593354	-1	0.99335	-0.00962596	0	0.94133	-0.0872275	0	0.65328	-0.614227	0
A0A0C4DG89	Probable ATP-dependent RNA helicase DDX46	DDX46	0.73166	-0.450755	-1	0.61095	-0.710874	-1	1.3847	0.469573	1	1.3052	0.384271	1
A0A0C4DGA2	Enoyl-CoA delta isomerase 2, mitochondrial	ECI2	1.132	0.178874	0	1.083	0.115033	0	1.105	0.144046	0	1.0561	0.0787464	-1
A0A0C4DGB5	Calpastatin	CAST	1.0622	0.0870554	0	1.075	0.104337	0	1.0545	0.0765591	0	1.0119	0.0170667	-1
A0A2R8Y425	Chromodomain-helicase-DNA-binding protein 4	CHD4	0.91645	-0.125872	0	0.92342	-0.114941	0	1.0886	0.122474	0	1.1226	0.166844	-1
K7ELJ7	Calpain small subunit 1	CAPNS1	0.94827	-0.0766302	0	1.0086	0.0123541	0	1.0573	0.0803848	0	0.99281	-0.0104104	-1
A0A0C4DGS1	Dolichyl-diphosphooligosaccharide--protein glycosyltransferase 48 kDa subunit	DDOST	1.0534	0.0750534	0	1.0326	0.0462815	0	1.0859	0.118891	0	0.95511	-0.0662612	-1
A0A3B3IRK3	NEDD4 family-interacting protein 2	NDFIP2	1.0485	0.0683269	0	1.2315	0.300417	1	0.86285	-0.212818	-1	0.81664	-0.292228	0
A0A590UJ21	Cullin-1	CUL1	0.92544	-0.111789	0	0.98512	-0.0216286	0	1.1088	0.148999	0	1.0218	0.0311128	-1
A0A0D9SES8	Transducin-like enhancer protein 3	TLE3	0.88201	-0.181133	0	0.80597	-0.311202	-1	1.1052	0.144307	0	1.1556	0.208642	1
A0A0D9SFB3	ATP-dependent RNA helicase DDX3X;ATP-dependent RNA helicase DDX3Y	DDX3X	0.9088	-0.137965	0	0.9037	-0.146084	0	0.88736	-0.172409	0	0.91957	-0.120969	-1
A0A0G2JH68	Protein diaphanous homolog 1	DIAPH1	1.0063	0.00906047	0	0.94132	-0.0872428	0	1.004	0.00575927	0	0.94858	-0.0761586	-1
A0A0G2JIW1	Heat shock 70 kDa protein 1B;Heat shock 70 kDa protein 1A	HSPA1B	0.84708	-0.23943	0	0.87735	-0.188776	0	0.88933	-0.169209	0	0.89984	-0.15226	-1
A0A0G2JNZ2	Protein scribble homolog	SCRIB	0.88358	-0.178567	0	0.96855	-0.0461016	0	1.1405	0.189666	1	1.0058	0.00834346	-1
A0A0J9YXF2	Serum paraoxonase/arylesterase 2	PON2	1.0594	0.0832474	0	1.1336	0.180912	0	0.83563	-0.259064	-1	0.92226	-0.116755	-1
A0A0R4J2E8	Matrin-3	MATR3	0.93791	-0.0924786	0	0.93664	-0.0944334	0	1.0842	0.116631	0	1.0687	0.0958569	-1
A0A0U1RRM6	Protein enabled homolog	ENAH	0.98509	-0.0216726	0	0.99878	-0.00176116	0	0.96554	-0.0505921	0	0.94794	-0.0771323	-1
A0A140T9I0		HLA-A	1.0995	0.136848	0	1.2242	0.291839	1	0.94927	-0.0751096	0	0.8751	-0.19248	-1
A0A1B0GW13	Renin receptor	ATP6AP2	0.84635	-0.240674	0	1.1385	0.187134	1	0.97533	-0.0360377	0	0.79389	-0.332989	0
A0A1B0GTB8	Carnitine O-palmitoyltransferase 2, mitochondrial	CPT2	0.52054	-0.941919	-1	0.45783	-1.12712	-1	1.1268	0.172231	0	1.0175	0.0250288	-1
A0A1B0GTU4	Paxillin	PXN	1.1252	0.170181	0	1.3007	0.379288	1	1.2296	0.298189	1	1.1161	0.158466	-1
A0A1B0GW44	Cathepsin D;Cathepsin D light chain;Cathepsin D heavy chain	CTSD	0.93572	-0.0958512	0	0.95165	-0.071497	0	0.99544	-0.00659373	0	1.0066	0.0094905	-1
A0A1B0GWJ0	Adenylosuccinate lyase	ADSL	0.98161	-0.0267781	0	1.0234	0.0333701	0	1.0963	0.132643	0	1.0803	0.111432	-1
A0A1C7CYX9	Dihydropyrimidinase-related protein 2	DPYSL2	1.1362	0.184217	0	1.0459	0.0647449	0	1.0965	0.132906	0	0.99328	-0.00972763	-1
A0A1W2PQT3	NAD-dependent malic enzyme, mitochondrial	ME2	0.97282	-0.0397552	0	1.0261	0.0371713	0	0.99015	-0.014281	0	1.0518	0.0728604	-1
A0A1W2PPZ5	Transcription elongation factor A protein 1	TCEA1	0.91585	-0.126817	0	0.83858	-0.25398	0	1.0214	0.030548	0	0.99859	-0.00203564	-1
A0A1X7SBZ2	Probable ATP-dependent RNA helicase DDX17	DDX17	1.2723	0.347439	1	1.2886	0.365804	1	0.84838	-0.237217	-1	0.80478	-0.313334	0
A0A1W2PS43	Lysosome membrane protein 2	SCARB2	1.1927	0.254231	1	1.0843	0.116764	0	1.2398	0.310107	1	1.0261	0.0371713	-1
A0A286YF22	D-3-phosphoglycerate dehydrogenase	PHGDH	1.1113	0.152248	0	1.0549	0.0771062	0	1.0844	0.116897	0	1.0553	0.0776532	-1
A0A286YF37	F-box only protein 2	FBXO2	0.99191	-0.0117189	0	0.95312	-0.0692702	0	0.97593	-0.0351504	0	0.88552	-0.175403	-1
A0A2C9F2P4	Palmitoyl-protein thioesterase 1	PPT1	1.0363	0.0514417	0	0.88662	-0.173612	0	1.2272	0.29537	1	1.1238	0.168385	-1
A0A2Q2TH77	Golgin subfamily A member 2	GOLGA2	0.91513	-0.127951	0	1.0888	0.122739	0	1.18	0.238787	1	0.87632	-0.19047	-1
A6NNI4	Tetraspanin;CD9 antigen	CD9	1.077	0.107018	0	1.1512	0.203138	1	1.0854	0.118227	0	1.0704	0.09815	-1
A0A2R8Y765	SWI/SNF-related matrix-associated actin-dependent regulator of chromatin subfamily E member 1	SMARCE1	0.96903	-0.0453868	0	1.0904	0.124857	0	1.1182	0.161178	0	1.3374	0.419431	1
A0A2R8Y595	Transcriptional repressor CTCF	CTCF	1.1174	0.160146	0	1.2973	0.375512	1	1.1434	0.19333	1	1.1543	0.207018	1
H0YH87	Ataxin-2	ATXN2	1.2653	0.339479	1	1.2695	0.34426	1	1.0317	0.0450235	0	1.0125	0.0179219	-1
A0A2R8YDQ9	Succinyl-CoA ligase [ADP-forming] subunit beta, mitochondrial	SUCLA2	1.2365	0.306262	1	0.97834	-0.0315922	0	1.2933	0.371057	1	1.1324	0.179384	-1
A0A2R8Y7R9	Liprin-alpha-1	PPFIA1	1.0513	0.0721744	0	1.0323	0.0458623	0	1.1091	0.149389	0	1.1108	0.151599	-1
A0A2R8Y811	40S ribosomal protein S14	RPS14	0.92275	-0.115988	0	0.99688	-0.00450825	0	0.99517	-0.0069851	0	0.99392	-0.00879836	-1
E7ETK0	40S ribosomal protein S24	RPS24	1.033	0.0468403	0	0.99042	-0.0138876	0	1.017	0.0243197	0	1.0602	0.0843364	-1
A0A2R8Y891	ATP-dependent 6-phosphofructokinase, muscle type	PFKM	1.0086	0.0123541	0	0.95811	-0.0617368	0	0.92976	-0.10507	0	1.0136	0.0194884	-1
A0A2R8YD50	Peroxisomal multifunctional enzyme type 2;(3R)-hydroxyacyl-CoA dehydrogenase;Enoyl-CoA hydratase 2	HSD17B4	1.0911	0.125783	0	1.0445	0.0628125	0	1.0291	0.0413832	0	0.93758	-0.0929863	-1
A0A2R8YFH5	Protein transport protein Sec23B	SEC23B	0.90152	-0.149569	0	0.91734	-0.124472	0	0.91754	-0.124157	0	0.88585	-0.174866	-1
A0A2U3TZH3	Elongation factor 1-alpha 2	EEF1A2	0.99284	-0.0103669	0	1.0483	0.0680516	0	0.97192	-0.0410905	0	0.66524	-0.588053	0
A0A3B3IRI2	CTP synthase 1;CTP synthase	CTPS1	1.1244	0.169155	0	1.0562	0.078883	0	0.975	-0.0365259	0	0.97329	-0.0390584	-1
A0A3B3IRI3	Tight junction protein ZO-2	TJP2	0.91294	-0.131408	0	1.0457	0.064469	0	0.86795	-0.204316	-1	0.91654	-0.12573	-1
C9J3L8	Translocon-associated protein subunit alpha	SSR1	1.035	0.0496308	0	1.0207	0.0295589	0	1.093	0.128293	0	1.0267	0.0380147	-1
A0A3B3IRV5	Heme-binding protein 1	HEBP1	0.8338	-0.262227	-1	0.72912	-0.455772	-1	0.70328	-0.507829	-1	0.74997	-0.415095	0
A0A3B3ISG5	Insulin-degrading enzyme	IDE	0.98401	-0.0232551	0	0.9669	-0.0485614	0	1.0511	0.0718999	0	1.0011	0.00158609	-1
A0A3B3ISQ4	Epidermal growth factor receptor kinase substrate 8-like protein 2	EPS8L2	0.95145	-0.0718003	0	1.0198	0.0282862	0	0.48257	-1.05119	-1	0.57483	-0.798793	0
A0A3B3IT54	UPF0488 protein C8orf33	C8orf33	1.2141	0.279887	1	1.1591	0.213005	1	1.0881	0.121811	0	1.0598	0.083792	-1
A0A3B3ITW1	Glycogen synthase kinase-3 beta	GSK3B	0.89266	-0.163817	0	0.92784	-0.108052	0	0.84097	-0.249874	-1	0.77336	-0.370788	0
A0A3B3ITW3	ATP-binding cassette sub-family D member 3	ABCD3	1.0904	0.124857	0	0.98075	-0.0280427	0	1.0188	0.0268709	0	0.93586	-0.0956354	-1
A0A3B3IUB5	Minor histocompatibility antigen H13	HM13	0.77774	-0.36264	-1	0.81059	-0.302956	-1	0.96243	-0.0552465	0	1.0049	0.00705194	-1
A0A3B3IUD7	Protein RRP5 homolog	PDCD11	1.2182	0.284751	1	0.91906	-0.121769	0	0.87123	-0.198874	-1	0.91216	-0.132641	-1
A0A3F2YNY6	Pre-mRNA-processing factor 40 homolog A	PRPF40A	0.8729	-0.196112	0	0.87167	-0.198146	0	1.0327	0.0464212	0	0.99933	-0.00096693	-1
A0A494C001	Putative RNA-binding protein 15	RBM15	1.1452	0.1956	1	1.212	0.27739	1	0.92611	-0.110745	0	1.4609	0.546857	1
A0A494C017	Myeloid-associated differentiation marker	MYADM	0.82229	-0.282281	-1	0.94431	-0.0826675	0	0.67779	-0.56109	-1	0.85763	-0.221573	-1
A0A494C039	Hypoxia up-regulated protein 1	HYOU1	1.0212	0.0302654	0	0.98187	-0.0263961	0	0.97246	-0.0402892	0	0.89038	-0.167507	-1
A0A494C0R8	Clustered mitochondria protein homolog	CLUH	1.1908	0.251931	1	1.207	0.271426	1	0.93181	-0.101892	0	1.0024	0.00345832	-1
A0A494C1F2	Nuclear pore complex protein Nup214	NUP214	0.80427	-0.314248	-1	0.77469	-0.368309	-1	0.94107	-0.0876261	0	0.92805	-0.107726	-1
A0A494C1L1	Lamin-B receptor	LBR	0.88258	-0.180201	0	0.98025	-0.0287784	0	0.98623	-0.020004	0	0.8212	-0.284194	0
A0A494C1L5	Lipopolysaccharide-responsive and beige-like anchor protein	LRBA	1.1131	0.154583	0	1.0006	0.000865357	0	1.0114	0.0163537	0	0.93316	-0.0998036	-1
A0A494C1N0	Peptidyl-prolyl cis-trans isomerase FKBP2	FKBP2	1.0478	0.0673634	0	1.0827	0.114634	0	0.90857	-0.13833	0	0.86557	-0.208278	-1
A0A499FI31	Squamous cell carcinoma antigen recognized by T-cells 3	SART3	1.0237	0.033793	0	0.97197	-0.0410163	0	1.2061	0.27035	1	1.0516	0.072586	-1
A0A4W8VYG7	Cell growth regulator with EF hand domain protein 1	CGREF1	0.90256	-0.147905	0	0.91031	-0.13557	0	0.8679	-0.204399	-1	0.87229	-0.19712	-1
A0A590UK01	Serine/arginine-rich splicing factor 6	SRSF6	0.93007	-0.104589	0	0.90777	-0.139601	0	1.1051	0.144177	0	1.0425	0.0600474	-1
A0A5F9UJX7	45 kDa calcium-binding protein	SDF4	0.92264	-0.11616	0	0.85342	-0.228672	0	1.3631	0.446891	1	1.1596	0.213627	1
A0A5F9ZHM4	L-lactate dehydrogenase B chain;L-lactate dehydrogenase	LDHB	0.95408	-0.0678179	0	1.0045	0.00647756	0	0.97617	-0.0347957	0	1.0263	0.0374525	-1
A0A5F9ZHN7	Phosphatidylinositide phosphatase SAC1	SACM1L	1.0784	0.108892	0	0.94669	-0.079036	0	1.079	0.109695	0	0.99777	-0.0032208	-1
A0A5F9ZHN9	Fatty aldehyde dehydrogenase	ALDH3A2	1.1151	0.157173	0	1.012	0.0172093	0	1.2215	0.288654	1	1.2772	0.352984	1
A0AV96	RNA-binding protein 47	RBM47	1.2252	0.293017	1	1.1047	0.143655	0	0.88776	-0.171758	0	1.1115	0.152508	-1
A0AVT1	Ubiquitin-like modifier-activating enzyme 6	UBA6	0.88094	-0.182884	0	1.0031	0.00446544	0	0.90789	-0.139411	0	0.94318	-0.084395	-1
M0R026	Acetolactate synthase-like protein	ILVBL	0.83809	-0.254823	-1	0.73082	-0.452412	-1	0.72164	-0.470649	-1	0.85325	-0.22896	-1
A2A274	Aconitate hydratase, mitochondrial	ACO2	1.0744	0.103531	0	0.96614	-0.0496958	0	1.2862	0.363115	1	1.0954	0.131458	-1
A5YKK6	CCR4-NOT transcription complex subunit 1	CNOT1	1.032	0.045443	0	0.86844	-0.203502	0	1.0975	0.134221	0	1.114	0.155749	-1
A6NDG6	Phosphoglycolate phosphatase	PGP	0.8348	-0.260497	-1	0.93407	-0.0983974	0	1.0006	0.000865357	0	1.0596	0.0835197	-1
A6NFX8	ADP-sugar pyrophosphatase	NUDT5	0.90004	-0.151939	0	0.89108	-0.166373	0	1.0626	0.0875986	0	1.0556	0.0780633	-1
A6NHR9	Structural maintenance of chromosomes flexible hinge domain-containing protein 1	SMCHD1	0.89531	-0.159541	0	0.93919	-0.090511	0	1.1559	0.209017	1	1.1051	0.144177	-1
E9PJK1	Tetraspanin;CD81 antigen	CD81	1.2136	0.279293	1	1.0619	0.0866479	0	0.99744	-0.00369803	0	1.1745	0.232047	1
A6NMQ3	Alpha-endosulfine	ENSA	0.85011	-0.234279	0	0.79906	-0.323624	-1	0.82891	-0.270713	-1	0.85774	-0.221388	-1
A6NNK5	Tumor suppressor p53-binding protein 1	TP53BP1	0.91963	-0.120875	0	0.77225	-0.37286	-1	0.89612	-0.158236	0	1.0006	0.000865357	-1
A6PVN5	Serine/threonine-protein phosphatase 2A activator	PPP2R4	1.0794	0.11023	0	0.98629	-0.0199162	0	1.452	0.538041	1	0.94834	-0.0765237	-1
A8K878	Mesencephalic astrocyte-derived neurotrophic factor	MANF	0.97246	-0.0402892	0	0.92452	-0.113224	0	0.92943	-0.105582	0	0.87705	-0.189269	-1
A9Z1X7	Serine/arginine repetitive matrix protein 1	SRRM1	0.62069	-0.688055	-1	0.73241	-0.449277	-1	1.1952	0.257252	1	1.1793	0.237931	1
B0QYK0	RNA-binding protein EWS	EWSR1	1.1293	0.175429	0	1.1706	0.227248	1	0.84501	-0.24296	-1	0.90584	-0.142672	-1
H3BQQ9	SUMO-conjugating enzyme UBC9	UBE2I	0.9169	-0.125164	0	0.9665	-0.0491584	0	1.0303	0.0430645	0	1.037	0.0524159	-1
B1AJY7	26S proteasome non-ATPase regulatory subunit 10	PSMD10	0.87106	-0.199156	0	0.85502	-0.22597	0	1.0576	0.0807941	0	1.0134	0.0192037	-1
B1ALA9	Ribose-phosphate pyrophosphokinase 1	PRPS1	1.1131	0.154583	0	1.0549	0.0771062	0	1.0753	0.104739	0	1.0701	0.0977456	-1
B1AMS2	Septin-6	2006-09-01	0.93481	-0.0972549	0	0.97248	-0.0402595	0	1.107	0.146655	0	1.0468	0.0659858	-1
B1AMU7	Exosome complex component CSL4	EXOSC1	0.88501	-0.176234	0	0.83231	-0.264807	-1	1.0363	0.0514417	0	0.94501	-0.0815985	-1
B1AP13	Complement decay-accelerating factor	CD55	1.0006	0.000865357	0	1.1009	0.138683	0	0.90728	-0.14038	0	1.2479	0.319502	1
B1APM4	Sterol O-acyltransferase 1	SOAT1	0.98454	-0.0224783	0	0.96155	-0.0565662	0	0.85557	-0.225042	-1	0.90266	-0.147745	-1
B4DDF4	Calponin;Calponin-2	CNN2	0.83218	-0.265032	-1	0.87295	-0.196029	0	0.88975	-0.168528	0	0.89869	-0.154105	-1
B4DJV2	Citrate synthase;Citrate synthase, mitochondrial	CS	1.0884	0.122209	0	1.1001	0.137635	0	1.1088	0.148999	0	1.0539	0.075738	-1
B4DLR8	NAD(P)H dehydrogenase [quinone] 1	NQO1	1.0152	0.021764	0	1.0187	0.0267293	0	0.99191	-0.0117189	0	0.98785	-0.0176361	-1
B4DR80	Serine/threonine-protein kinase 24;Serine/threonine-protein kinase 24 36 kDa subunit;Serine/threonine-protein kinase 24 12 kDa subunit	STK24	1.2912	0.368712	1	1.9372	0.953973	1	1.0128	0.0183493	0	1.1418	0.19131	-1
Q8NBY1	Serine/threonine-protein kinase 26	STK26	0.96173	-0.0562962	0	0.95821	-0.0615862	0	1.0717	0.0999011	0	1.0201	0.0287106	-1
B5MBZ0	Echinoderm microtubule-associated protein-like 4	EML4	1.1143	0.156138	0	0.94728	-0.0781372	0	0.99942	-0.000837006	0	0.9541	-0.0677876	-1
C9JKY3	Epithelial cell adhesion molecule	EPCAM	1.3153	0.395392	1	1.3535	0.436695	1	0.85079	-0.233125	-1	1.2144	0.280244	1
B5MCF9	Pescadillo homolog	PES1	1.0861	0.119157	0	1.1615	0.215989	1	1.0654	0.0913952	0	1.0289	0.0411028	-1
B5MDF5	GTP-binding nuclear protein Ran	RAN	0.95038	-0.0734236	0	0.98338	-0.0241791	0	1.0558	0.0783366	0	1.0319	0.0453032	-1
B7Z6D5	Probable ATP-dependent RNA helicase DDX27	DDX27	1.0807	0.111966	0	1.0205	0.0292762	0	1.214	0.279768	1	0.99931	-0.000995803	-1
B7Z9I1	Medium-chain specific acyl-CoA dehydrogenase, mitochondrial	ACADM	0.93745	-0.0931864	0	0.94165	-0.0867372	0	0.99435	-0.00817434	0	0.97748	-0.0328609	-1
B8ZZQ6	Prothymosin alpha;Prothymosin alpha, N-terminally processed;Thymosin alpha-1	PTMA	0.96493	-0.0515038	0	1.0304	0.0432045	0	1.033	0.0468403	0	1.0123	0.0176369	-1
C9J2I0	Arf-GAP domain and FG repeat-containing protein 1	AGFG1	1.0063	0.00906047	0	0.99409	-0.00855162	0	1.0024	0.00345832	0	0.99772	-0.0032931	-1
B9A067	MICOS complex subunit MIC60	IMMT	1.0543	0.0762854	0	1.0436	0.0615688	0	1.0964	0.132774	0	1.0004	0.000576963	-1
C9J0K6	Sorcin	SRI	0.93694	-0.0939714	0	0.95874	-0.0607885	0	1.0752	0.104605	0	1.1103	0.15095	-1
C9J2Y9	DNA-directed RNA polymerase;DNA-directed RNA polymerase II subunit RPB2	POLR2B	0.83878	-0.253636	-1	0.98847	-0.0167309	0	0.98164	-0.0267341	0	0.99541	-0.00663721	-1
C9J8R4	DCN1-like protein;DCN1-like protein 1	DCUN1D1	1.0579	0.0812033	0	1.0343	0.0486547	0	1.0806	0.111833	0	1.1333	0.18053	-1
C9J931	GTP-binding protein Rheb	RHEB	1.0153	0.0219061	0	0.96369	-0.053359	0	0.95145	-0.0718003	0	1.0207	0.0295589	-1
C9JA08	60S ribosomal export protein NMD3	NMD3	1.0672	0.0938306	0	1.2977	0.375957	1	0.98548	-0.0211015	0	1.0239	0.0340748	-1
C9JAB2	Serine/arginine-rich splicing factor 7	SRSF7	0.98754	-0.0180889	0	0.97459	-0.0371327	0	1.1654	0.220825	1	1.0872	0.120617	-1
C9JFE4	COP9 signalosome complex subunit 1	GPS1	0.85386	-0.227929	0	0.98042	-0.0285282	0	0.97629	-0.0346183	0	0.98338	-0.0241791	-1
C9JFR7	Cytochrome c	CYCS	1.0254	0.0361868	0	1.0083	0.0119249	0	0.98396	-0.0233284	0	0.96152	-0.0566112	-1
C9JIF9	Acylamino-acid-releasing enzyme	APEH	0.70537	-0.503548	-1	0.79378	-0.333189	-1	0.73407	-0.44601	-1	0.81013	-0.303775	0
C9JJ19	28S ribosomal protein S34, mitochondrial	MRPS34	0.90525	-0.143612	0	0.91938	-0.121267	0	1.0134	0.0192037	0	1.0877	0.121281	-1
C9JLU1	DNA-directed RNA polymerases I, II, and III subunit RPABC3	POLR2H	0.95403	-0.0678935	0	0.978	-0.0320936	0	1.1031	0.141564	0	1.0703	0.0980152	-1
C9JXB8	60S ribosomal protein L24	RPL24	1.0673	0.0939658	0	0.98908	-0.0158409	0	1.0152	0.021764	0	1.0406	0.0574156	-1
C9JRZ6	MICOS complex subunit MIC19	CHCHD3	1.0561	0.0787464	0	0.99608	-0.00566648	0	1.0513	0.0721744	0	1.0024	0.00345832	-1
C9JZR2	Catenin delta-1	CTNND1	0.96798	-0.0469509	0	0.99269	-0.0105848	0	1.0793	0.110096	0	1.0029	0.00417776	-1
D3YTB1	60S ribosomal protein L32	RPL32	1.0576	0.0807941	0	0.9851	-0.0216579	0	0.98186	-0.0264108	0	1.0561	0.0787464	-1
D6R938	Calcium/calmodulin-dependent protein kinase type II subunit delta	CAMK2D	1.0898	0.124063	0	1.1307	0.177216	0	1.1599	0.214	1	1.2302	0.298893	1
D6RA00	Enolase-phosphatase E1	ENOPH1	1.0371	0.052555	0	0.99423	-0.00834846	0	0.97602	-0.0350174	0	1.1312	0.177854	-1
D6RGI3	Septin-11	2011-09-01	1.0003	0.000432744	0	1.0381	0.0539454	0	1.0686	0.0957219	0	0.99829	-0.00246912	-1
D6REX3	Protein transport protein Sec31A	SEC31A	0.91546	-0.127431	0	0.91727	-0.124582	0	1.0119	0.0170667	0	0.95195	-0.0710423	-1
D6RGE2	Isochorismatase domain-containing protein 1	ISOC1	0.93357	-0.0991699	0	1.0257	0.0366088	0	1.0317	0.0450235	0	1.0575	0.0806577	-1
E2QRB3	Pyrroline-5-carboxylate reductase 1, mitochondrial;Pyrroline-5-carboxylate reductase	PYCR1	0.94704	-0.0785027	0	0.96146	-0.0567013	0	0.59	-0.761213	-1	0.61682	-0.697079	0
E5KLJ9	Dynamin-like 120 kDa protein, mitochondrial;Dynamin-like 120 kDa protein, form S1	OPA1	1.0748	0.104068	0	0.87031	-0.200399	0	1.1143	0.156138	0	1.1006	0.13829	-1
E5RFP0	NudC domain-containing protein 2	NUDCD2	0.80394	-0.31484	-1	0.66274	-0.593485	-1	0.93008	-0.104573	0	1.0315	0.0447438	-1
E5RGN3	Copper transport protein ATOX1	ATOX1	1.0169	0.0241778	0	0.94599	-0.0801032	0	1.0102	0.0146409	0	1.091	0.125651	-1
E5RHG8	Transcription elongation factor B polypeptide 1	TCEB1	0.88636	-0.174035	0	0.94551	-0.0808354	0	0.96907	-0.0453272	0	0.94793	-0.0771476	-1
E5RHW4	Erlin-2	ERLIN2	0.70583	-0.502607	-1	0.79985	-0.322199	-1	0.94778	-0.0773759	0	0.9135	-0.130523	-1
E5RIW3	Tubulin-specific chaperone A	TBCA	0.97212	-0.0407937	0	1.0141	0.0201999	0	0.99859	-0.00203564	0	1.0349	0.0494914	-1
E5RJN7	Double-stranded RNA-binding protein Staufen homolog 2	STAU2	1.0154	0.0220482	0	0.90012	-0.151811	0	0.91483	-0.128424	0	0.91474	-0.128566	-1
E5RJR5	S-phase kinase-associated protein 1	SKP1	1.0113	0.016211	0	0.96626	-0.0495167	0	0.92428	-0.113598	0	0.9712	-0.0421597	-1
E5RK69	Annexin	ANXA6	0.93182	-0.101877	0	0.88186	-0.181378	0	0.89108	-0.166373	0	0.86521	-0.208878	-1
E7EM64	COP9 signalosome complex subunit 6	COPS6	1.0016	0.00230647	0	0.9356	-0.0960362	0	0.95905	-0.0603221	0	1.0286	0.0406821	-1
J3QLD9	Flotillin-2	FLOT2	0.94399	-0.0831565	0	0.85966	-0.218162	0	0.89505	-0.15996	0	0.89808	-0.155084	-1
E7ENJ6	AP-1 complex subunit mu-1	AP1M1	0.88133	-0.182246	0	0.81731	-0.291045	-1	1.0085	0.0122111	0	1.0203	0.0289934	-1
E7EV99	Alpha-adducin	ADD1	1.0529	0.0743684	0	1.0308	0.0437644	0	0.93193	-0.101707	0	0.90105	-0.150321	-1
E7EPM6	Long-chain-fatty-acid--CoA ligase 1	ACSL1	1.0708	0.098689	0	0.97159	-0.0415805	0	1.1418	0.19131	1	1.0194	0.0277203	-1
E7EPN9	Protein PRRC2C	PRRC2C	0.86554	-0.208328	0	0.91295	-0.131392	0	0.79668	-0.327928	-1	0.75759	-0.400511	0
E7EPT4	NADH dehydrogenase [ubiquinone] flavoprotein 2, mitochondrial	NDUFV2	1.0909	0.125519	0	1.0148	0.0211954	0	1.1009	0.138683	0	1.0032	0.00460925	-1
E7EPV7	Alpha-synuclein	SNCA	1.1327	0.179766	0	0.79639	-0.328453	-1	1.1266	0.171975	0	0.85247	-0.230279	-1
E7EQ61	Ubiquitin-like modifier-activating enzyme 5	UBA5	1.1269	0.172359	0	1.2342	0.303576	1	1.0123	0.0176369	0	0.97429	-0.0375768	-1
E7EQ69	N-alpha-acetyltransferase 50	NAA50	0.95991	-0.0590289	0	1.0068	0.00977712	0	1.0638	0.0892269	0	0.95612	-0.0647364	-1
E7EQR4	Ezrin	EZR	1.0351	0.0497702	0	1.1027	0.14104	0	0.98288	-0.0249128	0	1.0276	0.0392788	-1
E9PES6	High mobility group protein B3	HMGB3	1.0143	0.0204844	0	0.92861	-0.106855	0	0.96109	-0.0572566	0	0.94896	-0.0755808	-1
E7ESY4	Metastasis-associated protein MTA1	MTA1	0.88566	-0.175175	0	0.99134	-0.0125482	0	0.9642	-0.0525957	0	0.76534	-0.385827	0
E7ETZ4	Basic leucine zipper and W2 domain-containing protein 2	BZW2	1.0024	0.00345832	0	1.0521	0.0732718	0	0.99507	-0.00713008	0	0.99137	-0.0125045	-1
E7EU96	Casein kinase II subunit alpha 3;Casein kinase II subunit alpha	CSNK2A1	1.06	0.0840643	0	1.0644	0.0900404	0	1.1455	0.195977	1	1.0656	0.091666	-1
E7EUU4	Eukaryotic translation initiation factor 4 gamma 1	EIF4G1	0.9553	-0.0659742	0	0.95916	-0.0601566	0	0.96386	-0.0531045	0	1.0035	0.00504062	-1
E7EVA0	Microtubule-associated protein;Microtubule-associated protein 4	MAP4	0.94358	-0.0837833	0	0.9328	-0.10036	0	0.96117	-0.0571365	0	0.9664	-0.0493076	-1
G3V2E7	Kinesin light chain 1	KLC1	1.0861	0.119157	0	0.92517	-0.11221	0	0.96879	-0.0457441	0	1.0716	0.0997665	-1
E7EVX8	U4/U6 small nuclear ribonucleoprotein Prp31	PRPF31	0.98817	-0.0171688	0	0.93304	-0.0999892	0	0.92275	-0.115988	0	0.92079	-0.119056	-1
E7EWR4	Cleavage stimulation factor subunit 2	CSTF2	0.95647	-0.0642084	0	0.95705	-0.0633338	0	1.0034	0.00489684	0	1.0027	0.00389003	-1
E7EX17	Eukaryotic translation initiation factor 4B	EIF4B	0.98433	-0.022786	0	0.97271	-0.0399183	0	1.0663	0.0926134	0	1.1073	0.147046	-1
E7EX44	Caldesmon	CALD1	1.127	0.172488	0	1.1871	0.247441	1	0.8653	-0.208728	-1	0.78903	-0.341848	0
E7EX90	Dynactin subunit 1	DCTN1	0.89143	-0.165807	0	0.91612	-0.126392	0	0.78129	-0.35607	-1	0.83233	-0.264772	0
F8VZJ2	Nascent polypeptide-associated complex subunit alpha;Nascent polypeptide-associated complex subunit alpha, muscle-specific form	NACA	0.92953	-0.105427	0	1.0094	0.013498	0	0.98302	-0.0247073	0	1.0124	0.0177794	-1
E9PDF6	Unconventional myosin-Ib	MYO1B	1.1642	0.219339	1	1.0121	0.0173518	0	0.8667	-0.206395	-1	1.034	0.0482362	-1
E9PKY5	Peptidyl-prolyl cis-trans isomerase;Peptidyl-prolyl cis-trans isomerase E	PPIE	1.0553	0.0776532	0	0.89952	-0.152773	0	1.0906	0.125122	0	1.0169	0.0241778	-1
E9PF19	Transducin beta-like protein 2	TBL2	1.087	0.120352	0	1.0373	0.0528332	0	0.94065	-0.0882701	0	0.85251	-0.230211	-1
E9PFR3	Serine/threonine-protein phosphatase 2A 56 kDa regulatory subunit delta isoform	PPP2R5D	0.94477	-0.0819649	0	1.0309	0.0439044	0	0.98514	-0.0215993	0	0.95722	-0.0630776	-1
E9PGT1	Translin	TSN	0.98487	-0.0219948	0	0.9709	-0.0426054	0	1.0215	0.0306892	0	1.0158	0.0226164	-1
E9PGT6	COP9 signalosome complex subunit 8	COPS8	0.88473	-0.176691	0	0.89841	-0.154554	0	0.9351	-0.0968074	0	0.89412	-0.16146	-1
E9PH64	NADH dehydrogenase [ubiquinone] 1 beta subcomplex subunit 9	NDUFB9	1.113	0.154454	0	1.2677	0.342213	1	1.1453	0.195726	1	1.0766	0.106482	-1
E9PI68	Signal peptidase complex subunit 2	SPCS2	0.98031	-0.0286901	0	0.94313	-0.0844715	0	1.0437	0.0617071	0	1.0277	0.0394192	-1
E9PS17	N-terminal kinase-like protein	SCYL1	0.92203	-0.117114	0	0.87039	-0.200266	0	0.76085	-0.394316	-1	0.68018	-0.556012	0
H7BXH2	Serine/threonine-protein phosphatase 6 regulatory subunit 3	PPP6R3	0.96481	-0.0516832	0	0.99528	-0.00682564	0	1.1292	0.175301	1	1.0522	0.073409	-1
E9PKP7	Nucleolar transcription factor 1	UBTF	1.0055	0.00791308	0	1.0704	0.09815	0	0.99198	-0.0116171	0	0.95538	-0.0658534	-1
E9PM92	Small acidic protein	C11orf58	1.0148	0.0211954	0	1.0811	0.1125	0	1.0776	0.107822	0	1.1164	0.158854	-1
E9PMS6	LIM domain only protein 7	LMO7	1.0164	0.0234683	0	1.1108	0.151599	0	0.82845	-0.271513	-1	0.96166	-0.0564012	-1
E9PPQ1	Tumor protein D53	TPD52L1	0.88996	-0.168188	0	0.66206	-0.594966	-1	0.57886	-0.788714	-1	0.72684	-0.46029	0
E9PPW7	NADH dehydrogenase [ubiquinone] iron-sulfur protein 8, mitochondrial	NDUFS8	1.0919	0.126841	0	1.0112	0.0160684	0	1.2415	0.312084	1	1.0667	0.0931545	-1
E9PPY3	Ribosomal RNA-processing protein 8	RRP8	0.88996	-0.168188	0	0.86388	-0.211097	0	0.88004	-0.184359	-1	0.79519	-0.330628	0
E9PRQ7	UBX domain-containing protein 1	UBXN1	1.0392	0.0554733	0	0.88495	-0.176332	0	0.94647	-0.0793713	0	0.97474	-0.0369106	-1
E9PSI1	Charged multivesicular body protein 4a	CHMP4A	1.0463	0.0652966	0	1.1756	0.233397	1	0.92197	-0.117208	0	1.0396	0.0560285	-1
F1T0I1	Protein transport protein Sec16A	SEC16A	0.78872	-0.342415	-1	0.80293	-0.316654	-1	0.95057	-0.0731352	0	0.82076	-0.284968	0
F2Z3J9	Prostaglandin reductase 1	PTGR1	0.90253	-0.147953	0	0.95393	-0.0680447	0	0.90294	-0.147298	0	0.83764	-0.255598	0
F5GWN5	Phosphatidylinositol 4-phosphate 3-kinase C2 domain-containing subunit beta	PIK3C2B	1.0742	0.103263	0	1.1089	0.149129	0	0.97365	-0.0385248	0	1.1127	0.154065	-1
F5GWT4	Serine/threonine-protein kinase WNK1	WNK1	1.0014	0.00201836	0	1.1239	0.168514	0	1.4303	0.516318	1	1.3144	0.394404	1
F5GXJ9	CD166 antigen	ALCAM	1.0465	0.0655723	0	1.1447	0.19497	1	1.0204	0.0291348	0	1.1074	0.147176	-1
F5GXX5	Dolichyl-diphosphooligosaccharide--protein glycosyltransferase subunit DAD1	DAD1	1.1114	0.152378	0	1.0974	0.134089	0	1.1306	0.177089	1	1.0449	0.0633649	-1
F5GYQ1	V-type proton ATPase subunit d 1	ATP6V0D1	1.0197	0.0281448	0	1.1114	0.152378	0	1.1044	0.143263	0	0.86211	-0.214056	-1
F5GZS6	4F2 cell-surface antigen heavy chain	SLC3A2	0.93152	-0.102341	0	0.89871	-0.154072	0	1.1374	0.18574	1	1.1125	0.153805	-1
F5H157	Ras-related protein Rab-35	RAB35	0.96572	-0.0503231	0	1.164	0.219091	1	1.3263	0.407407	1	1.1192	0.162468	-1
F5H365	Protein transport protein Sec23A	SEC23A	0.93727	-0.0934634	0	0.88799	-0.171385	0	0.96295	-0.0544672	0	0.90097	-0.150449	-1
F8VY35	Nucleosome assembly protein 1-like 1	NAP1L1	1.0228	0.0325241	0	0.97515	-0.0363039	0	1.0216	0.0308304	0	1.0335	0.0475384	-1
H0Y8R1	G-rich sequence factor 1	GRSF1	0.88943	-0.169047	0	0.94778	-0.0773759	0	1.0342	0.0485152	0	0.98074	-0.0280574	-1
F5H619	HEAT repeat-containing protein 5A	HEATR5A	1.0667	0.0931545	0	0.98403	-0.0232258	0	0.99939	-0.000880312	0	0.94978	-0.0743347	-1
F5H669	Cleavage and polyadenylation specificity factor subunit 7	CPSF7	0.95138	-0.0719064	0	0.81392	-0.297041	-1	0.89497	-0.160089	0	0.84456	-0.243728	0
F6QMI7	Dystonin	DST	0.68129	-0.553659	-1	0.67382	-0.569565	-1	0.8063	-0.310611	-1	0.84516	-0.242704	0
H7C3P4	N-acetylglucosamine-6-sulfatase	GNS	1.0729	0.101516	0	1.0049	0.00705194	0	1.159	0.212881	1	1.1644	0.219587	1
F6T1Q0	2,5-phosphodiesterase 12	PDE12	1.0526	0.0739573	0	0.92144	-0.118038	0	0.91964	-0.120859	0	0.85736	-0.222027	-1
F6TLX2	Glyoxalase domain-containing protein 4	GLOD4	1.0623	0.0871912	0	1.0544	0.0764223	0	1.0298	0.0423642	0	1.1213	0.165172	-1
F6VRR5	Polymerase delta-interacting protein 3	POLDIP3	1.1618	0.216362	1	1.2388	0.308943	1	1.3425	0.424922	1	1.2048	0.268794	1
F8VPD4	CAD protein;Glutamine-dependent carbamoyl-phosphate synthase;Aspartate carbamoyltransferase;Dihydroorotase	CAD	0.85118	-0.232464	0	0.84237	-0.247474	0	0.78272	-0.353432	-1	0.79306	-0.334498	0
F8VV56	Tetraspanin;CD63 antigen	CD63	1.039	0.0551957	0	1.0826	0.1145	0	0.99308	-0.0100182	0	0.9089	-0.137807	-1
F8VVA7	Coatomer subunit zeta-1	COPZ1	1.0442	0.0623981	0	0.99775	-0.00324972	0	0.98257	-0.0253679	0	0.87811	-0.187526	-1
F8VXC8	SWI/SNF complex subunit SMARCC2	SMARCC2	0.88588	-0.174817	0	0.8663	-0.207061	0	1.1245	0.169284	0	1.0787	0.109294	-1
F8VXU5	Vacuolar protein sorting-associated protein 29	VPS29	0.97135	-0.0419369	0	1.0708	0.098689	0	1.0815	0.113034	0	0.97883	-0.0308698	-1
F8VYE8	Serine/threonine-protein phosphatase;Serine/threonine-protein phosphatase PP1-gamma catalytic subunit	PPP1CC	0.90296	-0.147266	0	0.88369	-0.178388	0	0.81432	-0.296332	-1	1.107	0.146655	-1
F8W1A4	Adenylate kinase 2, mitochondrial;Adenylate kinase 2, mitochondrial;Adenylate kinase 2, mitochondrial, N-terminally processed	AK2	1.0098	0.0140696	0	0.99051	-0.0137566	0	1.0686	0.0957219	0	0.98642	-0.019726	-1
F8W1U7	ADP-ribosylation factor GTPase-activating protein 1	ARFGAP1	0.90889	-0.137822	0	0.9726	-0.0400815	0	0.8515	-0.231922	-1	0.80882	-0.306109	0
F8W7Q4	Protein FAM162A	FAM162A	1.1301	0.17645	0	1.1127	0.154065	0	1.0359	0.0508847	0	1.0909	0.125519	-1
F8W7U8	Double-strand break repair protein MRE11A	MRE11A	0.76272	-0.390775	-1	0.68106	-0.554146	-1	1.0834	0.115566	0	1.1449	0.195222	1
F8W8I6	Nucleolysin TIA-1 isoform p40	TIA1	0.65404	-0.612549	-1	0.60249	-0.730991	-1	1.2803	0.356482	1	0.96686	-0.0486211	-1
F8W9S7	GTPase-activating protein and VPS9 domain-containing protein 1	GAPVD1	1.0072	0.0103502	0	0.93579	-0.0957433	0	0.96509	-0.0512646	0	0.94202	-0.0861704	-1
F8WCF6	Actin-related protein 2/3 complex subunit 4	ARPC4-TTLL3	0.88526	-0.175827	0	0.9737	-0.0384508	0	0.98042	-0.0285282	0	1.0652	0.0911243	-1
G3V0I5	NADH dehydrogenase [ubiquinone] flavoprotein 1, mitochondrial	NDUFV1	1.0633	0.0885487	0	1.003	0.00432161	0	1.0097	0.0139267	0	1.0771	0.107152	-1
G3V198	Nuclear pore complex protein Nup160	NUP160	1.0506	0.0712135	0	0.87682	-0.189647	0	1.0424	0.059909	0	1.0225	0.0321008	-1
G3V2I9	Protein NDRG2	NDRG2	0.94353	-0.0838597	0	1.0553	0.0776532	0	0.76614	-0.38432	-1	1.1856	0.245617	1
G3V4C1	Heterogeneous nuclear ribonucleoproteins C1/C2	HNRNPC	1.0178	0.0254541	0	1.0123	0.0176369	0	1.1273	0.172872	0	1.0599	0.0839282	-1
G3V4P8	Glia maturation factor beta	GMFB	1.0034	0.00489684	0	0.9828	-0.0250302	0	1.1416	0.191057	1	1.0823	0.1141	-1
G3V529	ATP-dependent RNA helicase DDX24	DDX24	1.092	0.126973	0	1.0375	0.0531113	0	1.0306	0.0434845	0	1.0951	0.131063	-1
G3V5T9	Cyclin-dependent kinase 2	CDK2	0.81296	-0.298744	-1	0.68429	-0.54732	-1	0.98543	-0.0211747	0	1.0775	0.107688	-1
G3XAI2	Laminin subunit beta-1	LAMB1	1.0556	0.0780633	0	0.98671	-0.019302	0	1.0738	0.102725	0	0.96845	-0.0462505	-1
G3XAN4	Translocating chain-associated membrane protein 1	TRAM1	1.1545	0.207268	1	1.1518	0.20389	1	0.87548	-0.191854	-1	0.91013	-0.135855	-1
G5E9A6	Ubiquitin carboxyl-terminal hydrolase;Ubiquitin carboxyl-terminal hydrolase 11	USP11	0.95883	-0.060653	0	0.99137	-0.0125045	0	0.83447	-0.261068	-1	0.88984	-0.168382	-1
G5E9Q6	Profilin;Profilin-2	PFN2	0.79956	-0.322722	-1	0.81359	-0.297626	-1	0.93385	-0.0987373	0	0.86621	-0.207211	-1
G5E9W7	28S ribosomal protein S22, mitochondrial	MRPS22	1.1234	0.167872	0	1.1969	0.259303	1	1.1216	0.165558	0	0.89222	-0.164529	-1
G5EA30	CUGBP Elav-like family member 1	CELF1	0.89713	-0.156611	0	1.0405	0.057277	0	1.168	0.22404	1	1.0903	0.124725	-1
G5EA31	Protein transport protein Sec24C	SEC24C	0.98624	-0.0199893	0	1.0035	0.00504062	0	0.95974	-0.0592845	0	1.0167	0.023894	-1
G8JLB6	Heterogeneous nuclear ribonucleoprotein H;Heterogeneous nuclear ribonucleoprotein H, N-terminally processed	HNRNPH1	0.9951	-0.00708658	0	0.96966	-0.0444491	0	0.99692	-0.00445036	0	0.94783	-0.0772998	-1
H0Y2V6	Centrosomal protein of 170 kDa	CEP170	0.74771	-0.419449	-1	0.87656	-0.190075	0	0.6972	-0.520356	-1	0.95761	-0.0624899	-1
H0Y8X4	2-deoxynucleoside 5-phosphate N-hydrolase 1	DNPH1	0.97375	-0.0383767	0	0.92841	-0.107166	0	0.9809	-0.027822	0	0.98866	-0.0164536	-1
H0Y993	Protein DEK	DEK	1.0283	0.0402612	0	1.0245	0.03492	0	1.1606	0.214871	1	1.0444	0.0626744	-1
H0YD13	CD44 antigen	CD44	1.1806	0.23952	1	1.1054	0.144569	0	0.87582	-0.191294	-1	0.93694	-0.0939714	-1
H0YDU8	Serine/threonine-protein phosphatase;Serine/threonine-protein phosphatase 5	PPP5C	1.0908	0.125387	0	1.0107	0.0153548	0	1.0304	0.0432045	0	1.0926	0.127765	-1
H0YFD6	Trifunctional enzyme subunit alpha, mitochondrial;Long-chain enoyl-CoA hydratase;Long chain 3-hydroxyacyl-CoA dehydrogenase	HADHA	1.0643	0.0899049	0	1.0283	0.0402612	0	1.1206	0.164271	0	0.99716	-0.00410308	-1
H0YHA7	60S ribosomal protein L18	RPL18	0.99144	-0.0124026	0	0.96496	-0.051459	0	0.95205	-0.0708908	0	0.96998	-0.0439731	-1
H0YI09	Methyltransferase-like protein 7A	METTL7A	0.90409	-0.145462	0	0.97216	-0.0407343	0	1.0772	0.107286	0	0.87134	-0.198692	-1
H0YN81	WD repeat-containing protein 61;WD repeat-containing protein 61, N-terminally processed	WDR61	0.93985	-0.0894976	0	0.8981	-0.155052	0	0.93573	-0.0958358	0	0.89989	-0.152179	-1
H0YNW5	Deoxyuridine 5-triphosphate nucleotidohydrolase, mitochondrial	DUT	0.81729	-0.29108	-1	0.8856	-0.175273	0	0.9654	-0.0508013	0	1.0531	0.0746424	-1
H3BV80	RNA-binding protein with serine-rich domain 1	RNPS1	1.063	0.0881416	0	1.0383	0.0542233	0	1.1504	0.202136	1	1.2002	0.263275	1
H3BNC9	40S ribosomal protein S17	RPS17	0.95901	-0.0603822	0	1.0034	0.00489684	0	0.98793	-0.0175193	0	1.0035	0.00504062	-1
H3BPE1	Microtubule-actin cross-linking factor 1, isoforms 1/2/3/5	MACF1	1.0361	0.0511633	0	0.94439	-0.0825453	0	0.95112	-0.0723007	0	0.91858	-0.122523	-1
H3BTA2	Serine/threonine-protein phosphatase;Serine/threonine-protein phosphatase 4 catalytic subunit	PPP4C	0.88505	-0.176169	0	0.99568	-0.00624594	0	1.0203	0.0289934	0	1.0419	0.0592168	-1
H3BU86	Syntaxin-16	STX16-NPEPL1	1.1947	0.256648	1	1.416	0.501821	1	0.78373	-0.351571	-1	0.85992	-0.217726	-1
H3BUH9	Glycine cleavage system H protein, mitochondrial	GCSH	1.0473	0.0666748	0	1.02	0.0285692	0	1.0469	0.0661236	0	1.0598	0.083792	-1
H3BUN4	Nucleolar protein 3	NOL3	1.0841	0.116498	0	1.1295	0.175684	0	0.75537	-0.404745	-1	0.92372	-0.114472	-1
H7BXI1	Extended synaptotagmin-2	ESYT2	1.0436	0.0615688	0	1.0518	0.0728604	0	1.021	0.0299829	0	1.051	0.0717627	-1
H7BZJ3		PDIA3	1.0271	0.0385767	0	0.91147	-0.133733	0	0.96351	-0.0536285	0	1.0104	0.0149265	-1
H7C2Q8	Probable rRNA-processing protein EBP2	EBNA1BP2	1.0581	0.081476	0	1.0077	0.0110662	0	0.99252	-0.0108319	0	0.9974	-0.00375589	-1
I3L0N3	Vesicle-fusing ATPase	NSF	0.97241	-0.0403634	0	0.87761	-0.188348	0	0.96739	-0.0478305	0	0.95746	-0.0627159	-1
I3L1P8	Mitochondrial 2-oxoglutarate/malate carrier protein	SLC25A11	1.0101	0.0144981	0	0.98543	-0.0211747	0	0.89659	-0.15748	0	0.90636	-0.141844	-1
J3KMX1	Nuclear pore complex protein Nup88	NUP88	0.86872	-0.203037	0	0.83231	-0.264807	-1	0.97309	-0.0393549	0	0.97259	-0.0400963	-1
J3KN29	26S proteasome non-ATPase regulatory subunit 9	PSMD9	0.97686	-0.0337763	0	0.9502	-0.0736969	0	0.78383	-0.351387	-1	0.89561	-0.159057	-1
J3KN36	Nodal modulator 2;Nodal modulator 3;Nodal modulator 1	NOMO3	0.98173	-0.0266018	0	0.96136	-0.0568513	0	0.93809	-0.0922018	0	0.93542	-0.0963138	-1
J3KP15	Serine/arginine-rich splicing factor 2	SRSF2	0.99191	-0.0117189	0	1.0062	0.00891709	0	1.2019	0.265317	1	1.1241	0.16877	-1
J3KPP4	Luc7-like protein 3	LUC7L3	1.2296	0.298189	1	1.2135	0.279174	1	1.0486	0.0684645	0	1.2347	0.304161	1
J3KPX7	Prohibitin-2	PHB2	0.85395	-0.227776	0	0.89512	-0.159847	0	0.98108	-0.0275573	0	1.0054	0.00776959	-1
J3KQ32	Obg-like ATPase 1	OLA1	0.98486	-0.0220094	0	0.94225	-0.0858182	0	1.0207	0.0295589	0	1.0069	0.00992041	-1
J3KQ48	Peptidyl-tRNA hydrolase 2, mitochondrial	PTRH2	1.903	0.928276	1	1.6697	0.739589	1	1.238	0.308011	1	1.0661	0.0923428	-1
J3KQJ1	Sulfatase-modifying factor 2	SUMF2	0.83857	-0.253997	-1	0.76015	-0.395644	-1	0.8397	-0.252054	-1	0.78615	-0.347123	0
J3KQN4	60S ribosomal protein L36a	RPL36A	1.0291	0.0413832	0	0.99769	-0.00333648	0	0.95098	-0.0725131	0	1.0324	0.046002	-1
J3KR44	Ubiquitin thioesterase OTUB1	OTUB1	0.97397	-0.0380508	0	0.96352	-0.0536135	0	1.0627	0.0877344	0	1.0998	0.137241	-1
J3QR09	Ribosomal protein L19;60S ribosomal protein L19	RPL19	1.2016	0.264957	1	1.1229	0.167229	0	1.0132	0.018919	0	1.1049	0.143916	-1
J3KTF8	Rho GDP-dissociation inhibitor 1	ARHGDIA	1.1793	0.237931	1	1.1787	0.237197	1	1.058	0.0813396	0	1.0964	0.132774	-1
J3KTL2	Serine/arginine-rich splicing factor 1	SRSF1	0.92633	-0.110402	0	0.91559	-0.127226	0	1.1024	0.140648	0	1.064	0.0894982	-1
J3QLI9	Small nuclear ribonucleoprotein Sm D1	SNRPD1	1.0194	0.0277203	0	0.94005	-0.0891906	0	1.0922	0.127237	0	1.0316	0.0448837	-1
J3QQY2	Transmembrane and coiled-coil domain-containing protein 1	TMCO1	0.93165	-0.10214	0	0.90115	-0.150161	0	1.0428	0.0604625	0	0.96376	-0.0532542	-1
J3QR07	YTH domain-containing protein 1	YTHDC1	1.1976	0.260146	1	0.95946	-0.0597054	0	0.8828	-0.179841	0	0.89357	-0.162347	-1
J3QRG6	Cyclin-dependent kinase inhibitor 2A	CDKN2A	1.0728	0.101381	0	1.1324	0.179384	0	0.9701	-0.0437946	0	1.0171	0.0244615	-1
J3QRS3	Myosin regulatory light chain 12A;Myosin regulatory light chain 12B;Myosin regulatory light polypeptide 9	MYL12A	1.0498	0.0701145	0	1.0165	0.0236102	0	1.0516	0.072586	0	0.98517	-0.0215554	-1
J3QRS9	BUB3-interacting and GLEBS motif-containing protein ZNF207	ZNF207	0.98642	-0.019726	0	1.0338	0.0479571	0	1.1658	0.22132	1	1.2075	0.272023	1
J3QT28	Mitotic checkpoint protein BUB3	BUB3	1.0164	0.0234683	0	0.95772	-0.0623242	0	1.2372	0.307079	1	1.1365	0.184598	-1
J3QTA2	BAG family molecular chaperone regulator 1	BAG1	0.96554	-0.0505921	0	1.1037	0.142348	0	1.0914	0.12618	0	1.1015	0.139469	-1
K7EIK7	Echinoderm microtubule-associated protein-like 2	EML2	0.8488	-0.236503	0	0.77033	-0.376451	-1	0.95324	-0.0690886	0	0.9675	-0.0476664	-1
K7EQ55	DAZ-associated protein 1	DAZAP1	0.98043	-0.0285135	0	1.0743	0.103397	0	0.91645	-0.125872	0	0.87709	-0.189203	-1
K7EKE6	Lon protease homolog, mitochondrial	LONP1	1.0921	0.127105	0	0.98279	-0.0250449	0	1.0685	0.0955869	0	0.99661	-0.00489904	-1
K7EKI8	Periplakin	PPL	0.47855	-1.06326	-1	0.55636	-0.845909	-1	0.95861	-0.0609841	0	1.0632	0.088413	-1
K7ELL7	Glucosidase 2 subunit beta	PRKCSH	0.95084	-0.0727255	0	0.98342	-0.0241204	0	1.05	0.0703893	0	0.96829	-0.0464889	-1
K7EM18	Eukaryotic translation initiation factor 1;Eukaryotic translation initiation factor 1b	EIF1	0.83924	-0.252845	-1	0.8343	-0.261362	0	0.84044	-0.250783	-1	0.86879	-0.202921	-1
K7EQ03	RNA-binding protein 42	RBM42	0.77945	-0.359472	-1	0.88498	-0.176283	0	0.84513	-0.242755	-1	0.92408	-0.11391	-1
K7ES61	39S ribosomal protein L4, mitochondrial	MRPL4	0.99832	-0.00242577	0	0.93277	-0.100407	0	0.99326	-0.00975668	0	0.92791	-0.107943	-1
M0QWZ7	Serine--tRNA ligase, mitochondrial	SARS2	0.87011	-0.20073	0	0.80918	-0.305467	-1	0.95329	-0.0690129	0	1.0854	0.118227	-1
M0QXB4	Coatomer subunit epsilon	COPE	1.0137	0.0196308	0	0.99433	-0.00820336	0	0.93331	-0.0995717	0	0.94547	-0.0808964	-1
M0QZR4	Rho guanine nucleotide exchange factor 1	ARHGEF1	0.84189	-0.248296	-1	0.90643	-0.141732	0	0.80745	-0.308555	-1	0.83437	-0.261241	0
M0R0F0	40S ribosomal protein S5;40S ribosomal protein S5, N-terminally processed	RPS5	0.96869	-0.045893	0	0.99316	-0.00990194	0	0.97455	-0.0371919	0	1.0166	0.0237521	-1
M0R3F4	BRISC and BRCA1-A complex member 1	BABAM1	0.80205	-0.318236	-1	0.80222	-0.31793	-1	0.92599	-0.110931	0	0.84029	-0.251041	0
M0R117	60S ribosomal protein L18a	RPL18A	1.0104	0.0149265	0	1.0699	0.097476	0	1.0095	0.0136409	0	0.98186	-0.0264108	-1
M0R165	Epidermal growth factor receptor substrate 15-like 1	EPS15L1	1.0533	0.0749164	0	1.125	0.169925	0	0.92639	-0.110308	0	1.1242	0.168899	-1
O00116	Alkyldihydroxyacetonephosphate synthase, peroxisomal	AGPS	1.0568	0.0797024	0	1.1125	0.153805	0	1.0475	0.0669502	0	0.99705	-0.00426224	-1
O00148	ATP-dependent RNA helicase DDX39A	DDX39A	1.1373	0.185613	0	1.0439	0.0619835	0	0.97761	-0.0326691	0	1.025	0.0356239	-1
O00151	PDZ and LIM domain protein 1	PDLIM1	1.1446	0.194844	1	1.0561	0.0787464	0	0.9782	-0.0317986	0	0.96111	-0.0572265	-1
O00154	Cytosolic acyl coenzyme A thioester hydrolase	ACOT7	0.98315	-0.0245165	0	0.97536	-0.0359933	0	1.0099	0.0142124	0	0.9651	-0.0512497	-1
O00159	Unconventional myosin-Ic	MYO1C	0.98411	-0.0231085	0	1.0946	0.130404	0	0.96744	-0.0477559	0	0.99567	-0.00626043	-1
O00161	Synaptosomal-associated protein 23;Synaptosomal-associated protein	SNAP23	1.0173	0.0247452	0	0.95643	-0.0642687	0	0.94484	-0.0818581	0	0.90067	-0.150929	-1
O00186	Syntaxin-binding protein 3	STXBP3	1.0034	0.00489684	0	1.0037	0.00532812	0	0.97059	-0.0430661	0	0.9999	-0.000144277	-1
O00231	26S proteasome non-ATPase regulatory subunit 11	PSMD11	0.95632	-0.0644346	0	0.94583	-0.0803472	0	0.97598	-0.0350765	0	0.95013	-0.0738032	-1
O00232	26S proteasome non-ATPase regulatory subunit 12	PSMD12	1.0001	0.000144262	0	1.0868	0.120086	0	1.01	0.0143553	0	0.9766	-0.0341603	-1
O00264	Membrane-associated progesterone receptor component 1	PGRMC1	1.1185	0.161565	0	1.0086	0.0123541	0	0.97556	-0.0356975	0	0.96255	-0.0550666	-1
O00267	Transcription elongation factor SPT5	SUPT5H	0.95352	-0.0686649	0	0.83124	-0.266663	-1	0.96659	-0.049024	0	0.94617	-0.0798287	-1
O00273	DNA fragmentation factor subunit alpha	DFFA	1.0628	0.0878701	0	1.133	0.180148	0	0.95641	-0.0642989	0	0.93934	-0.0902806	-1
O00299	Chloride intracellular channel protein 1	CLIC1	0.9989	-0.00158784	0	1.0172	0.0246034	0	0.9663	-0.0494569	0	1.0381	0.0539454	-1
O00303	Eukaryotic translation initiation factor 3 subunit F	EIF3F	0.95176	-0.0713303	0	0.94155	-0.0868904	0	1.0209	0.0298416	0	0.99529	-0.00681115	-1
O00410	Importin-5	IPO5	0.86733	-0.205347	0	0.85089	-0.232955	0	0.99729	-0.00391501	0	1.0124	0.0177794	-1
O00422	Histone deacetylase complex subunit SAP18	SAP18	1.0981	0.135009	0	1.0748	0.104068	0	1.2632	0.337083	1	1.187	0.24732	1
O00425	Insulin-like growth factor 2 mRNA-binding protein 3	IGF2BP3	0.76089	-0.39424	-1	0.73217	-0.449749	-1	0.74911	-0.416751	-1	0.87376	-0.194691	-1
O00429	Dynamin-1-like protein	DNM1L	1.1313	0.177982	0	1.0632	0.088413	0	1.0507	0.0713508	0	0.96882	-0.0456994	-1
O00442	RNA 3-terminal phosphate cyclase	RTCA	0.83213	-0.265119	-1	1.0234	0.0333701	0	0.9332	-0.0997418	0	0.92059	-0.119369	-1
O00443	Phosphatidylinositol 4-phosphate 3-kinase C2 domain-containing subunit alpha	PIK3C2A	0.97455	-0.0371919	0	0.84092	-0.24996	0	0.94985	-0.0742284	0	0.9842	-0.0229766	-1
O00461	Golgi integral membrane protein 4	GOLIM4	0.87161	-0.198245	0	0.7992	-0.323372	-1	1.1522	0.204391	1	1.0775	0.107688	-1
O00487	26S proteasome non-ATPase regulatory subunit 14	PSMD14	1.0775	0.107688	0	0.94693	-0.0786703	0	0.97129	-0.042026	0	1.0682	0.0951818	-1
O00499	Myc box-dependent-interacting protein 1	BIN1	1.0168	0.0240359	0	0.96585	-0.0501289	0	0.97253	-0.0401853	0	0.89986	-0.152228	-1
O00560	Syntenin-1	SDCBP	1.0124	0.0177794	0	0.97878	-0.0309435	0	0.89735	-0.156257	0	0.95448	-0.0672131	-1
O00566	U3 small nucleolar ribonucleoprotein protein MPP10	MPHOSPH10	0.99582	-0.0060431	0	0.93969	-0.0897432	0	0.97548	-0.0358158	0	1.0313	0.0444641	-1
O00567	Nucleolar protein 56	NOP56	1.0591	0.0828388	0	1.1425	0.192194	1	1.0092	0.0132121	0	0.96208	-0.0557712	-1
O00592	Podocalyxin	PODXL	1.3313	0.412836	1	1.3368	0.418784	1	1.0719	0.10017	0	1.0948	0.130667	-1
O00625	Pirin	PIR	0.91677	-0.125368	0	0.94106	-0.0876414	0	0.90056	-0.151106	0	0.87701	-0.189335	-1
O00629	Importin subunit alpha-3	KPNA4	0.97505	-0.0364519	0	1.0192	0.0274372	0	0.98422	-0.0229473	0	0.95078	-0.0728165	-1
O00764	Pyridoxal kinase	PDXK	0.83772	-0.25546	-1	0.84435	-0.244087	0	0.81252	-0.299525	-1	0.91552	-0.127337	-1
O14684	Prostaglandin E synthase	PTGES	1.2726	0.347779	1	1.269	0.343692	1	1.0304	0.0432045	0	1.0066	0.0094905	-1
O14732	Inositol monophosphatase 2	IMPA2	0.92295	-0.115676	0	0.95664	-0.063952	0	1.056	0.0786098	0	0.80401	-0.314715	0
O14737	Programmed cell death protein 5	PDCD5	0.98719	-0.0186003	0	1.0218	0.0311128	0	0.98302	-0.0247073	0	0.98978	-0.0148202	-1
O14744	Protein arginine N-methyltransferase 5;Protein arginine N-methyltransferase 5, N-terminally processed	PRMT5	0.98444	-0.0226248	0	1.0151	0.0216219	0	1.0043	0.00619029	0	1.0407	0.0575542	-1
O14745	Na(+)/H(+) exchange regulatory cofactor NHE-RF1	SLC9A3R1	0.97353	-0.0387027	0	0.98395	-0.0233431	0	0.90053	-0.151154	0	0.90383	-0.145877	-1
O14776	Transcription elongation regulator 1	TCERG1	0.90482	-0.144297	0	0.85229	-0.230584	0	1.0921	0.127105	0	1.0235	0.0335111	-1
O14818	Proteasome subunit alpha type-7	PSMA7	0.98	-0.0291463	0	0.98221	-0.0258966	0	1.0254	0.0361868	0	0.99707	-0.0042333	-1
O14828	Secretory carrier-associated membrane protein 3	SCAMP3	1.0427	0.0603241	0	1.0647	0.090447	0	0.68451	-0.546856	-1	0.72181	-0.470309	0
Q5VV89	Microsomal glutathione S-transferase 3	MGST3	1.0208	0.0297002	0	0.9795	-0.0298826	0	1.178	0.23634	1	0.92844	-0.107119	-1
O14907	Tax1-binding protein 3	TAX1BP3	0.92091	-0.118868	0	1.0041	0.00590296	0	1.0201	0.0287106	0	1.0252	0.0359054	-1
O14908	PDZ domain-containing protein GIPC1	GIPC1	1.0336	0.047678	0	0.94014	-0.0890525	0	1.0982	0.135141	0	1.0439	0.0619835	-1
O14929	Histone acetyltransferase type B catalytic subunit	HAT1	0.94859	-0.0761434	0	0.90025	-0.151602	0	1.042	0.0593553	0	1.0246	0.0350608	-1
O14964	Hepatocyte growth factor-regulated tyrosine kinase substrate	HGS	1.2247	0.292428	1	1.0559	0.0784732	0	0.95964	-0.0594348	0	0.98206	-0.0261169	-1
O14974	Protein phosphatase 1 regulatory subunit 12A	PPP1R12A	1.0745	0.103665	0	0.9607	-0.0578421	0	1.0542	0.0761486	0	0.98235	-0.025691	-1
O14975	Very long-chain acyl-CoA synthetase	SLC27A2	1.0781	0.108491	0	0.97893	-0.0307224	0	1.1676	0.223546	1	1.0736	0.102457	-1
O14976	Cyclin-G-associated kinase	GAK	0.47695	-1.06809	-1	0.71479	-0.484409	-1	0.89089	-0.166681	0	0.78199	-0.354778	0
O14979	Heterogeneous nuclear ribonucleoprotein D-like	HNRNPDL	1.2367	0.306496	1	1.2774	0.35321	1	1.1049	0.143916	0	1.123	0.167358	-1
O14980	Exportin-1	XPO1	0.97639	-0.0344706	0	0.94337	-0.0841044	0	1.0329	0.0467006	0	0.99959	-0.000591626	-1
O15031	Plexin-B2	PLXNB2	0.7922	-0.336063	-1	0.81533	-0.294544	-1	0.74648	-0.421824	-1	0.84495	-0.243062	0
O15042	U2 snRNP-associated SURP motif-containing protein	U2SURP	0.98851	-0.0166725	0	0.96884	-0.0456697	0	0.92146	-0.118007	0	1.0005	0.000721167	-1
O15067	Phosphoribosylformylglycinamidine synthase	PFAS	0.94058	-0.0883774	0	0.97194	-0.0410608	0	1.0784	0.108892	0	1.0235	0.0335111	-1
O15143	Actin-related protein 2/3 complex subunit 1B	ARPC1B	0.99728	-0.00392948	0	0.98851	-0.0166725	0	0.99281	-0.0104104	0	0.94325	-0.0842879	-1
O15144	Actin-related protein 2/3 complex subunit 2	ARPC2	1.0061	0.00877371	0	1.0631	0.0882773	0	1.0458	0.064607	0	0.98026	-0.0287636	-1
O15145	Actin-related protein 2/3 complex subunit 3	ARPC3	0.95487	-0.0666238	0	1.0041	0.00590296	0	0.99153	-0.0122717	0	0.94558	-0.0807286	-1
O15160	DNA-directed RNA polymerases I and III subunit RPAC1	POLR1C	0.81922	-0.287677	-1	0.95157	-0.0716183	0	1.0063	0.00906047	0	0.94058	-0.0883774	-1
O15173	Membrane-associated progesterone receptor component 2	PGRMC2	1.0707	0.0985543	0	1.0678	0.0946415	0	1.0195	0.0278618	0	0.96913	-0.0452379	-1
O15212	Prefoldin subunit 6	PFDN6	0.95808	-0.061782	0	0.94829	-0.0765998	0	0.95758	-0.0625351	0	1.0023	0.00331439	-1
Q5T8U5	Surfeit locus protein 4	SURF4	0.97626	-0.0346627	0	0.93964	-0.08982	0	0.95176	-0.0713303	0	0.88135	-0.182213	-1
O15270	Serine palmitoyltransferase 2	SPTLC2	0.92255	-0.116301	0	1.0157	0.0224743	0	0.84784	-0.238136	-1	0.81879	-0.288435	0
O15294	UDP-N-acetylglucosamine--peptide N-acetylglucosaminyltransferase 110 kDa subunit	OGT	0.96903	-0.0453868	0	1.0061	0.00877371	0	0.97788	-0.0322707	0	0.95482	-0.0666993	-1
O15305	Phosphomannomutase 2;Phosphomannomutase	PMM2	1.0983	0.135272	0	1.0498	0.0701145	0	0.94106	-0.0876414	0	1.0206	0.0294175	-1
O15355	Protein phosphatase 1G	PPM1G	0.86614	-0.207328	0	0.84431	-0.244155	0	1.0309	0.0439044	0	1.0071	0.0102069	-1
O15357	Phosphatidylinositol 3,4,5-trisphosphate 5-phosphatase 2	INPPL1	0.90341	-0.146547	0	0.95665	-0.0639369	0	0.85985	-0.217843	-1	0.82245	-0.282	0
O15371	Eukaryotic translation initiation factor 3 subunit D	EIF3D	0.95068	-0.0729683	0	0.98559	-0.0209405	0	1.0362	0.0513025	0	1.0174	0.024887	-1
O15400	Syntaxin-7	STX7	0.93702	-0.0938483	0	1.0931	0.128425	0	0.90111	-0.150225	0	0.95649	-0.0641782	-1
O15446	DNA-directed RNA polymerase I subunit RPA34	CD3EAP	0.85145	-0.232006	0	0.92553	-0.111648	0	0.91476	-0.128535	0	0.81642	-0.292617	0
O15479	Melanoma-associated antigen B2	MAGEB2	1.0821	0.113834	0	0.99457	-0.00785518	0	0.96902	-0.0454017	0	1.0068	0.00977712	-1
O15498	Synaptobrevin homolog YKT6	YKT6	0.95253	-0.0701636	0	0.98208	-0.0260875	0	0.92808	-0.107679	0	0.84466	-0.243557	0
O43143	Pre-mRNA-splicing factor ATP-dependent RNA helicase DHX15	DHX15	1.0513	0.0721744	0	1.0022	0.00317044	0	1.1199	0.16337	0	1.0183	0.0261627	-1
O43169	Cytochrome b5 type B	CYB5B	1.1685	0.224658	1	1.0693	0.0966667	0	1.0471	0.0663992	0	0.98324	-0.0243845	-1
O43172	U4/U6 small nuclear ribonucleoprotein Prp4	PRPF4	0.88491	-0.176397	0	0.95546	-0.0657326	0	1.2373	0.307195	1	1.1311	0.177726	-1
O43237	Cytoplasmic dynein 1 light intermediate chain 2	DYNC1LI2	0.83901	-0.25324	-1	0.85455	-0.226763	0	1.0439	0.0619835	0	1.0994	0.136716	-1
O43242	26S proteasome non-ATPase regulatory subunit 3	PSMD3	1.0186	0.0265876	0	0.98247	-0.0255147	0	0.97883	-0.0308698	0	1.0189	0.0270125	-1
O43252	Bifunctional 3-phosphoadenosine 5-phosphosulfate synthase 1;Sulfate adenylyltransferase;Adenylyl-sulfate kinase	PAPSS1	1.0777	0.107956	0	1.1009	0.138683	0	0.83597	-0.258477	-1	0.80711	-0.309163	0
O43264	Centromere/kinetochore protein zw10 homolog	ZW10	1.0149	0.0213376	0	0.90834	-0.138696	0	0.86897	-0.202622	-1	0.88191	-0.181297	-1
O43290	U4/U6.U5 tri-snRNP-associated protein 1	SART1	1.0048	0.00690837	0	0.93242	-0.100948	0	1.2126	0.278104	1	1.2223	0.289598	1
O43324	Eukaryotic translation elongation factor 1 epsilon-1	EEF1E1	1.1726	0.229711	1	1.0218	0.0311128	0	0.99149	-0.0123299	0	0.99307	-0.0100327	-1
O43390	Heterogeneous nuclear ribonucleoprotein R	HNRNPR	1.0043	0.00619029	0	0.93537	-0.0963909	0	0.99187	-0.011777	0	0.93046	-0.103984	-1
O43395	U4/U6 small nuclear ribonucleoprotein Prp3	PRPF3	1.0861	0.119157	0	0.98468	-0.0222731	0	1.3537	0.436908	1	1.2299	0.298541	1
O43396	Thioredoxin-like protein 1	TXNL1	0.96965	-0.044464	0	0.94422	-0.0828051	0	1.0673	0.0939658	0	1.0369	0.0522768	-1
O43399	Tumor protein D54	TPD52L2	0.98852	-0.0166579	0	0.9991	-0.00129901	0	0.8187	-0.288593	-1	0.86425	-0.210479	-1
O43447	Peptidyl-prolyl cis-trans isomerase H;Peptidyl-prolyl cis-trans isomerase	PPIH	1.1346	0.182184	0	1.1151	0.157173	0	1.6841	0.751978	1	1.4095	0.495183	1
O43488	Aflatoxin B1 aldehyde reductase member 2	AKR7A2	0.79346	-0.333771	-1	0.78088	-0.356827	-1	1.054	0.0758749	0	1.1236	0.168129	-1
O43504	Ragulator complex protein LAMTOR5	LAMTOR5	1.1708	0.227495	1	1.2049	0.268913	1	1.0347	0.0492125	0	1.1499	0.201508	1
O43583	Density-regulated protein	DENR	0.87854	-0.18682	0	0.93814	-0.0921249	0	1.1093	0.14965	0	1.0973	0.133958	-1
O43592	Exportin-T	XPOT	0.90171	-0.149265	0	0.97672	-0.0339831	0	1.3841	0.468948	1	0.95852	-0.0611196	-1
O43615	Mitochondrial import inner membrane translocase subunit TIM44	TIMM44	0.99325	-0.00977121	0	1.0496	0.0698396	0	0.88622	-0.174263	0	0.91303	-0.131266	-1
O43660	Pleiotropic regulator 1	PLRG1	0.96023	-0.0585481	0	0.94531	-0.0811406	0	1.0221	0.0315364	0	0.92769	-0.108285	-1
O43681	ATPase ASNA1	ASNA1	0.95845	-0.0612249	0	0.95062	-0.0730593	0	1.0458	0.064607	0	1.0512	0.0720372	-1
O43707	Alpha-actinin-4	ACTN4	0.97706	-0.0334809	0	1.0058	0.00834346	0	1.0168	0.0240359	0	1.0199	0.0284277	-1
O43719	HIV Tat-specific factor 1	HTATSF1	0.87741	-0.188677	0	0.87377	-0.194675	0	1.0898	0.124063	0	1.0496	0.0698396	-1
O43765	Small glutamine-rich tetratricopeptide repeat-containing protein alpha	SGTA	1.0173	0.0247452	0	1.0332	0.0471195	0	0.95315	-0.0692248	0	1.0361	0.0511633	-1
O43776	Asparagine--tRNA ligase, cytoplasmic	NARS	1.0368	0.0521376	0	1.0428	0.0604625	0	0.99684	-0.00456613	0	0.96094	-0.0574817	-1
O43809	Cleavage and polyadenylation specificity factor subunit 5	NUDT21	1.0296	0.042084	0	1.0924	0.127501	0	0.97573	-0.0354461	0	0.92887	-0.106451	-1
O43813	LanC-like protein 1	LANCL1	1.0725	0.100978	0	1.0341	0.0483757	0	0.99918	-0.0011835	0	0.94293	-0.0847774	-1
O43815	Striatin	STRN	0.98204	-0.0261463	0	0.86966	-0.201477	0	0.94172	-0.0866299	0	0.92174	-0.117568	-1
O43818	U3 small nucleolar RNA-interacting protein 2	RRP9	1.2096	0.27453	1	1.0172	0.0246034	0	1.1222	0.16633	0	1.0814	0.1129	-1
O43823	A-kinase anchor protein 8	AKAP8	1.0635	0.08882	0	0.94243	-0.0855426	0	1.0852	0.117961	0	1.0689	0.0961269	-1
O43847	Nardilysin	NRD1	0.93435	-0.097965	0	0.8635	-0.211732	0	0.91728	-0.124566	0	0.88696	-0.173059	-1
O43852	Calumenin	CALU	1.184	0.243669	1	1.1669	0.222681	1	1.0284	0.0404015	0	0.97141	-0.0418478	-1
O43865	Putative adenosylhomocysteinase 2	AHCYL1	0.92689	-0.10953	0	0.96064	-0.0579322	0	0.90956	-0.136759	0	0.94175	-0.086584	-1
O60216	Double-strand-break repair protein rad21 homolog	RAD21	0.89818	-0.154923	0	1.0552	0.0775165	0	1.0228	0.0325241	0	0.98259	-0.0253385	-1
O60220	Mitochondrial import inner membrane translocase subunit Tim8 A	TIMM8A	0.78812	-0.343513	-1	0.98687	-0.019068	0	0.93911	-0.0906339	0	0.78271	-0.35345	0
O60231	Putative pre-mRNA-splicing factor ATP-dependent RNA helicase DHX16	DHX16	0.90541	-0.143357	0	0.91051	-0.135253	0	1.2405	0.310922	1	1.0605	0.0847446	-1
O60232	Sjoegren syndrome/scleroderma autoantigen 1	SSSCA1	1.1367	0.184852	0	1.033	0.0468403	0	1.0455	0.0641931	0	1.109	0.149259	-1
O60264	SWI/SNF-related matrix-associated actin-dependent regulator of chromatin subfamily A member 5	SMARCA5	0.95394	-0.0680296	0	0.86202	-0.214207	0	1.0979	0.134747	0	1.0192	0.0274372	-1
O60271	C-Jun-amino-terminal kinase-interacting protein 4	SPAG9	1.084	0.116365	0	1.0128	0.0183493	0	1.0591	0.0828388	0	1.0875	0.121015	-1
O60306	Intron-binding protein aquarius	AQR	1.0248	0.0353424	0	1.0857	0.118626	0	1.1715	0.228357	1	0.9726	-0.0400815	-1
O60341	Lysine-specific histone demethylase 1A	KDM1A	0.97923	-0.0302803	0	0.91561	-0.127195	0	0.93811	-0.092171	0	1.0774	0.107554	-1
O60488	Long-chain-fatty-acid--CoA ligase 4	ACSL4	1.1082	0.148218	0	1.0351	0.0497702	0	1.0347	0.0492125	0	0.90956	-0.136759	-1
O60493	Sorting nexin-3	SNX3	0.95229	-0.0705271	0	0.95398	-0.0679691	0	1.0108	0.0154976	0	0.93817	-0.0920787	-1
O60506	Heterogeneous nuclear ribonucleoprotein Q	SYNCRIP	1.1122	0.153416	0	1.121	0.164786	0	1.0631	0.0882773	0	1.0638	0.0892269	-1
O60568	Procollagen-lysine,2-oxoglutarate 5-dioxygenase 3	PLOD3	0.99875	-0.0018045	0	0.95497	-0.0664727	0	0.9182	-0.12312	0	0.9129	-0.131471	-1
O60573	Eukaryotic translation initiation factor 4E type 2	EIF4E2	0.98998	-0.0145287	0	1.05	0.0703893	0	1.0532	0.0747794	0	0.95104	-0.0724221	-1
O60664	Perilipin-3	PLIN3	0.99669	-0.00478324	0	0.98797	-0.0174609	0	0.96085	-0.0576169	0	0.94085	-0.0879634	-1
O60684	Importin subunit alpha-7;Importin subunit alpha-6	KPNA6	1.0773	0.10742	0	0.97764	-0.0326248	0	1.02	0.0285692	0	1.0948	0.130667	-1
O60701	UDP-glucose 6-dehydrogenase	UGDH	1.1245	0.169284	0	1.121	0.164786	0	1.1651	0.220454	1	1.1356	0.183455	-1
O60749	Sorting nexin-2	SNX2	1.0526	0.0739573	0	1.0056	0.00805655	0	1.065	0.0908534	0	1.0553	0.0776532	-1
Q5QPK2	Dolichol-phosphate mannosyltransferase subunit 1	DPM1	1.2472	0.318693	1	1.1673	0.223175	1	1.0272	0.0387171	0	1.0237	0.033793	-1
O60763	General vesicular transport factor p115	USO1	1.0254	0.0361868	0	1.0179	0.0255958	0	0.95684	-0.0636504	0	0.9063	-0.141939	-1
O60784	Target of Myb protein 1	TOM1	1.1207	0.1644	0	1.3726	0.456911	1	0.90206	-0.148705	0	0.84036	-0.250921	0
O60825	6-phosphofructo-2-kinase/fructose-2,6-bisphosphatase 2;6-phosphofructo-2-kinase;Fructose-2,6-bisphosphatase	PFKFB2	0.80704	-0.309288	-1	0.92902	-0.106218	0	0.81536	-0.294491	-1	0.91821	-0.123104	-1
O60828	Polyglutamine-binding protein 1	PQBP1	0.82445	-0.278496	-1	0.81132	-0.301657	-1	0.92266	-0.116129	0	0.85722	-0.222263	-1
O60832	H/ACA ribonucleoprotein complex subunit 4	DKC1	1.0169	0.0241778	0	1.0447	0.0630887	0	0.92707	-0.10925	0	0.9222	-0.116848	-1
O60869	Endothelial differentiation-related factor 1	EDF1	1.0598	0.083792	0	1.0613	0.0858325	0	0.85085	-0.233023	-1	0.93193	-0.101707	-1
O60884	DnaJ homolog subfamily A member 2	DNAJA2	0.96834	-0.0464144	0	0.9779	-0.0322412	0	1.0841	0.116498	0	1.0448	0.0632268	-1
O60888	Protein CutA	CUTA	1.2232	0.29066	1	1.0451	0.063641	0	1.0634	0.0886844	0	0.93853	-0.0915252	-1
O60925	Prefoldin subunit 1	PFDN1	0.93314	-0.0998345	0	0.92082	-0.119009	0	0.97798	-0.0321231	0	0.95669	-0.0638766	-1
O75083	WD repeat-containing protein 1	WDR1	0.89783	-0.155486	0	0.89427	-0.161218	0	1.0526	0.0739573	0	1.0834	0.115566	-1
O75116	Rho-associated protein kinase 2	ROCK2	0.9238	-0.114348	0	0.91717	-0.124739	0	0.94687	-0.0787617	0	1.0051	0.00733905	-1
O75131	Copine-3	CPNE3	1.0445	0.0628125	0	1.0078	0.0112094	0	1.0631	0.0882773	0	0.99837	-0.00235351	-1
O75152	Zinc finger CCCH domain-containing protein 11A	ZC3H11A	1.2185	0.285106	1	1.1984	0.26111	1	0.81658	-0.292334	-1	1.0556	0.0780633	-1
O75223	Gamma-glutamylcyclotransferase	GGCT	1.0285	0.0405418	0	0.94359	-0.083768	0	0.90221	-0.148465	0	0.76591	-0.384753	0
O75306	NADH dehydrogenase [ubiquinone] iron-sulfur protein 2, mitochondrial	NDUFS2	0.95007	-0.0738943	0	1.0716	0.0997665	0	1.1359	0.183836	1	1.0191	0.0272956	-1
O75312	Zinc finger protein ZPR1	ZPR1	0.87021	-0.200564	0	0.94939	-0.0749272	0	1.0257	0.0366088	0	1.0209	0.0298416	-1
O75340	Programmed cell death protein 6	PDCD6	0.94075	-0.0881167	0	0.91232	-0.132388	0	0.97321	-0.039177	0	0.92866	-0.106778	-1
O75348	V-type proton ATPase subunit G 1	ATP6V1G1	1.3868	0.47176	1	1.0845	0.11703	0	1.1006	0.13829	0	1.2201	0.286999	1
O75367	Core histone macro-H2A.1;Histone H2A	H2AFY	1.0043	0.00619029	0	0.95191	-0.0711029	0	1.029	0.041243	0	0.96322	-0.0540627	-1
O75368	SH3 domain-binding glutamic acid-rich-like protein	SH3BGRL	1.0147	0.0210533	0	1.0605	0.0847446	0	1.0272	0.0387171	0	0.9651	-0.0512497	-1
O75369	Filamin-B	FLNB	1.0333	0.0472592	0	1.0277	0.0394192	0	0.9891	-0.0158117	0	0.9906	-0.0136255	-1
O75391	Sperm-associated antigen 7	SPAG7	0.98168	-0.0266753	0	1.1072	0.146916	0	1.1403	0.189413	1	1.0151	0.0216219	-1
O75396	Vesicle-trafficking protein SEC22b	SEC22B	1.0215	0.0306892	0	1.0294	0.0418037	0	0.90516	-0.143755	0	0.92841	-0.107166	-1
O75431	Metaxin-2	MTX2	1.1175	0.160275	0	1.101	0.138814	0	1.1411	0.190425	1	0.9608	-0.0576919	-1
O75436	Vacuolar protein sorting-associated protein 26A	VPS26A	1.0131	0.0187766	0	1.0053	0.00762609	0	1.0558	0.0783366	0	0.89409	-0.161508	-1
O75439	Mitochondrial-processing peptidase subunit beta	PMPCB	0.98309	-0.0246046	0	1.0233	0.0332292	0	1.0356	0.0504669	0	0.95869	-0.0608637	-1
O75475	PC4 and SFRS1-interacting protein	PSIP1	0.84103	-0.249771	-1	0.8614	-0.215245	0	1.0594	0.0832474	0	1.0004	0.000576963	-1
O75489	NADH dehydrogenase [ubiquinone] iron-sulfur protein 3, mitochondrial	NDUFS3	1.0351	0.0497702	0	0.94286	-0.0848845	0	1.0422	0.0596322	0	0.96432	-0.0524161	-1
Q5JRI1	Serine/arginine-rich splicing factor 10	SRSF10	0.8328	-0.263958	-1	0.82668	-0.274599	-1	1.1142	0.156008	0	0.96345	-0.0537183	-1
O75506	Heat shock factor-binding protein 1	HSBP1	1.0953	0.131326	0	0.90228	-0.148353	0	1.0671	0.0936954	0	0.9832	-0.0244432	-1
O75531	Barrier-to-autointegration factor;Barrier-to-autointegration factor, N-terminally processed	BANF1	1.0332	0.0471195	0	1.0377	0.0533894	0	1.0496	0.0698396	0	1.0396	0.0560285	-1
O75533	Splicing factor 3B subunit 1	SF3B1	0.87195	-0.197683	0	0.92716	-0.10911	0	1.1146	0.156526	0	1.0708	0.098689	-1
O75534	Cold shock domain-containing protein E1	CSDE1	0.95507	-0.0663216	0	0.97975	-0.0295144	0	1.1117	0.152768	0	1.1385	0.187134	-1
O75607	Nucleoplasmin-3	NPM3	1.0149	0.0213376	0	0.94032	-0.0887763	0	1.1022	0.140386	0	1.0793	0.110096	-1
O75608	Acyl-protein thioesterase 1	LYPLA1	1.0424	0.059909	0	0.97938	-0.0300594	0	1.0438	0.0618453	0	0.99548	-0.00653576	-1
O75643	U5 small nuclear ribonucleoprotein 200 kDa helicase	SNRNP200	0.96774	-0.0473086	0	0.90398	-0.145637	0	1.0238	0.0339339	0	0.97542	-0.0359045	-1
O75663	TIP41-like protein	TIPRL	1.009	0.0129262	0	0.99635	-0.00527547	0	0.88493	-0.176365	0	0.9777	-0.0325362	-1
O75694	Nuclear pore complex protein Nup155	NUP155	0.86317	-0.212283	0	0.88006	-0.184326	0	1.0222	0.0316775	0	0.97085	-0.0426797	-1
O75717	WD repeat and HMG-box DNA-binding protein 1	WDHD1	0.65387	-0.612924	-1	0.49925	-1.00217	-1	1.0076	0.010923	0	0.87815	-0.187461	-1
O75794	Cell division cycle protein 123 homolog	CDC123	1.0345	0.0489336	0	1.0037	0.00532812	0	1.0282	0.0401209	0	1.088	0.121679	-1
O75821	Eukaryotic translation initiation factor 3 subunit G	EIF3G	0.93576	-0.0957895	0	0.99249	-0.0108755	0	0.93185	-0.10183	0	0.90385	-0.145845	-1
O75822	Eukaryotic translation initiation factor 3 subunit J	EIF3J	1.0388	0.0549179	0	1.1052	0.144307	0	1.1081	0.148088	0	1.0489	0.0688771	-1
O75874	Isocitrate dehydrogenase [NADP] cytoplasmic	IDH1	1.1145	0.156397	0	1.138	0.186501	1	0.92391	-0.114176	0	0.90579	-0.142751	-1
O75915	PRA1 family protein 3	ARL6IP5	0.96504	-0.0513394	0	0.9532	-0.0691491	0	0.98438	-0.0227127	0	1.0121	0.0173518	-1
O75934	Pre-mRNA-splicing factor SPF27	BCAS2	1.052	0.0731347	0	0.8539	-0.227861	0	1.1018	0.139862	0	1.0463	0.0652966	-1
O75937	DnaJ homolog subfamily C member 8	DNAJC8	0.96986	-0.0441516	0	1.005	0.0071955	0	1.1115	0.152508	0	1.1156	0.15782	-1
O75940	Survival of motor neuron-related-splicing factor 30	SMNDC1	1.1397	0.188654	0	1.0433	0.0611541	0	1.9728	0.980245	1	1.8269	0.869398	1
O75947	ATP synthase subunit d, mitochondrial	ATP5H	1.0898	0.124063	0	1.0233	0.0332292	0	1.1764	0.234379	1	1.0159	0.0227584	-1
O75955	Flotillin-1	FLOT1	0.8344	-0.261189	-1	0.82791	-0.272454	-1	0.8818	-0.181477	0	0.74438	-0.425889	0
O75964	ATP synthase subunit g, mitochondrial	ATP5L	0.99058	-0.0136546	0	1.0176	0.0251706	0	1.0103	0.0147838	0	0.98417	-0.0230206	-1
O76003	Glutaredoxin-3	GLRX3	1.0266	0.0378742	0	1.0994	0.136716	0	1.0619	0.0866479	0	1.0985	0.135535	-1
O76021	Ribosomal L1 domain-containing protein 1	RSL1D1	0.9849	-0.0219508	0	1.021	0.0299829	0	0.96501	-0.0513842	0	1.0317	0.0450235	-1
O76031	ATP-dependent Clp protease ATP-binding subunit clpX-like, mitochondrial	CLPX	1.2044	0.268315	1	1.0131	0.0187766	0	0.87795	-0.187789	-1	0.98945	-0.0153013	-1
P0CL80	G antigen 12F;G antigen 2E;G antigen 1;G antigen 12I;G antigen 12G;G antigen 7	GAGE12F	0.70592	-0.502423	-1	0.85742	-0.221926	0	0.79634	-0.328544	-1	0.90836	-0.138664	-1
O76094	Signal recognition particle subunit SRP72	SRP72	1.0068	0.00977712	0	1.0309	0.0439044	0	1.1544	0.207143	1	1.0037	0.00532812	-1
O94760	N(G),N(G)-dimethylarginine dimethylaminohydrolase 1	DDAH1	1.1083	0.148348	0	1.2033	0.266996	1	1.1356	0.183455	1	1.0646	0.0903115	-1
O94776	Metastasis-associated protein MTA2	MTA2	1.0313	0.0444641	0	0.97593	-0.0351504	0	1.1212	0.165044	0	1.0233	0.0332292	-1
O94806	Serine/threonine-protein kinase D3	PRKD3	0.82126	-0.284089	-1	0.82448	-0.278444	-1	0.99744	-0.00369803	0	0.85742	-0.221926	-1
O94826	Mitochondrial import receptor subunit TOM70	TOMM70A	1.1321	0.179001	0	1.2061	0.27035	1	1.0849	0.117562	0	0.99421	-0.00837748	-1
O94855	Protein transport protein Sec24D	SEC24D	0.98064	-0.0282045	0	0.88763	-0.17197	0	1.1601	0.214249	1	1.1284	0.174279	-1
O94888	UBX domain-containing protein 7	UBXN7	0.94199	-0.0862164	0	0.89484	-0.160298	0	1.0467	0.065848	0	1.0225	0.0321008	-1
O94906	Pre-mRNA-processing factor 6	PRPF6	0.72798	-0.458029	-1	0.67481	-0.567447	-1	0.96588	-0.0500841	0	0.91387	-0.129939	-1
O94925	Glutaminase kidney isoform, mitochondrial	GLS	0.98777	-0.0177529	0	0.95984	-0.0591342	0	1.2491	0.320889	1	1.1252	0.170181	-1
O94992	Protein HEXIM1	HEXIM1	1.1216	0.165558	0	1.1311	0.177726	0	0.85636	-0.223711	-1	0.90339	-0.146579	-1
O95071	E3 ubiquitin-protein ligase UBR5	UBR5	1.1905	0.251568	1	0.91315	-0.131076	0	1.0261	0.0371713	0	0.87889	-0.186245	-1
O95155	Ubiquitin conjugation factor E4 B	UBE4B	1.0535	0.0751903	0	1.0526	0.0739573	0	0.9624	-0.0552915	0	0.87967	-0.184966	-1
O95163	Elongator complex protein 1	IKBKAP	1.0515	0.0724489	0	0.97332	-0.0390139	0	1.0538	0.0756011	0	1.0377	0.0533894	-1
O95197	Reticulon-3;Reticulon	RTN3	1.1395	0.188401	0	1.0287	0.0408223	0	1.1557	0.208767	1	1.0969	0.133432	-1
O95202	LETM1 and EF-hand domain-containing protein 1, mitochondrial	LETM1	1.0967	0.133169	0	1.0366	0.0518593	0	1.1484	0.199625	1	1.0553	0.0776532	-1
O95218	Zinc finger Ran-binding domain-containing protein 2	ZRANB2	0.83697	-0.256752	-1	0.88834	-0.170816	0	0.51224	-0.965108	-1	0.58599	-0.771052	0
O95292	Vesicle-associated membrane protein-associated protein B/C	VAPB	1.11	0.15056	0	1.0605	0.0847446	0	0.9948	-0.00752159	0	0.90856	-0.138346	-1
O95297	Myelin protein zero-like protein 1	MPZL1	1.0976	0.134352	0	1.1581	0.21176	1	0.62735	-0.672658	-1	0.92876	-0.106622	-1
O95336	6-phosphogluconolactonase	PGLS	0.52125	-0.939953	-1	0.50198	-0.994298	-1	0.93268	-0.100546	0	0.8351	-0.259979	0
O95347	Structural maintenance of chromosomes protein 2	SMC2	0.89498	-0.160073	0	0.80737	-0.308698	-1	1.0518	0.0728604	0	0.95437	-0.0673794	-1
O95352	Ubiquitin-like modifier-activating enzyme ATG7	ATG7	0.77924	-0.35986	-1	0.73441	-0.445342	-1	0.9303	-0.104232	0	0.90515	-0.143771	-1
O95372	Acyl-protein thioesterase 2	LYPLA2	0.94894	-0.0756112	0	0.89213	-0.164674	0	0.84411	-0.244497	-1	0.93565	-0.0959591	-1
O95373	Importin-7	IPO7	0.90051	-0.151186	0	0.94104	-0.087672	0	0.95674	-0.0638012	0	1.009	0.0129262	-1
O95379	Tumor necrosis factor alpha-induced protein 8	TNFAIP8	0.99669	-0.00478324	0	0.78672	-0.346078	-1	1.0241	0.0343566	0	1.0385	0.0545012	-1
O95394	Phosphoacetylglucosamine mutase	PGM3	1.0026	0.00374614	0	1.1045	0.143393	0	0.84335	-0.245797	-1	0.87398	-0.194328	-1
O95433	Activator of 90 kDa heat shock protein ATPase homolog 1	AHSA1	1.0075	0.0107798	0	0.93552	-0.0961596	0	1.0115	0.0164963	0	0.98687	-0.019068	-1
O95456	Proteasome assembly chaperone 1	PSMG1	1.0633	0.0885487	0	1.0461	0.0650208	0	1.031	0.0440443	0	0.99327	-0.00974216	-1
O95486	Protein transport protein Sec24A	SEC24A	0.80697	-0.309413	-1	0.90482	-0.144297	0	0.88523	-0.175876	0	0.88869	-0.170248	-1
O95571	Persulfide dioxygenase ETHE1, mitochondrial	ETHE1	1.0577	0.0809305	0	1.0565	0.0792928	0	0.68323	-0.549557	-1	0.70082	-0.512884	0
O95573	Long-chain-fatty-acid--CoA ligase 3	ACSL3	0.97757	-0.0327281	0	1.123	0.167358	0	0.85189	-0.231261	-1	0.85606	-0.224216	-1
O95602	DNA-directed RNA polymerase I subunit RPA1;DNA-directed RNA polymerase	POLR1A	0.94692	-0.0786855	0	1.0619	0.0866479	0	1.0384	0.0543623	0	0.77763	-0.362844	0
O95747	Serine/threonine-protein kinase OSR1	OXSR1	1.0182	0.026021	0	1.0017	0.0024505	0	0.95565	-0.0654458	0	1.0574	0.0805212	-1
O95757	Heat shock 70 kDa protein 4L	HSPA4L	0.81727	-0.291115	-1	0.77486	-0.367992	-1	1.0088	0.0126402	0	0.98816	-0.0171834	-1
O95777	U6 snRNA-associated Sm-like protein LSm8	LSM8	0.95156	-0.0716335	0	1.0214	0.030548	0	1.08	0.111031	0	1.0024	0.00345832	-1
O95782	AP-2 complex subunit alpha-1	AP2A1	0.88739	-0.17236	0	0.89395	-0.161734	0	1.0129	0.0184917	0	0.99133	-0.0125627	-1
O95816	BAG family molecular chaperone regulator 2	BAG2	0.94885	-0.0757481	0	1.0298	0.0423642	0	0.96246	-0.0552015	0	0.98774	-0.0177968	-1
O95817	BAG family molecular chaperone regulator 3	BAG3	0.95611	-0.0647515	0	0.87002	-0.20088	0	1.0054	0.00776959	0	0.85227	-0.230618	-1
O95831	Apoptosis-inducing factor 1, mitochondrial	AIFM1	0.91888	-0.122052	0	0.88395	-0.177963	0	1.059	0.0827026	0	1.071	0.0989585	-1
O95861	3(2),5-bisphosphate nucleotidase 1	BPNT1	0.78716	-0.345271	-1	0.87046	-0.20015	0	0.98994	-0.014587	0	0.91748	-0.124251	-1
O95881	Thioredoxin domain-containing protein 12	TXNDC12	0.94288	-0.0848539	0	0.96336	-0.0538531	0	0.9539	-0.0680901	0	0.85083	-0.233057	-1
O96000	NADH dehydrogenase [ubiquinone] 1 beta subcomplex subunit 10	NDUFB10	1.0606	0.0848807	0	0.96266	-0.0549017	0	1.0273	0.0388576	0	1.0079	0.0113525	-1
O96005	Cleft lip and palate transmembrane protein 1	CLPTM1	0.85707	-0.222515	0	0.95512	-0.0662461	0	1.1206	0.164271	0	1.1	0.137504	-1
O96008	Mitochondrial import receptor subunit TOM40 homolog	TOMM40	0.99628	-0.00537683	0	1.025	0.0356239	0	0.99831	-0.00244022	0	0.96948	-0.044717	-1
O96019	Actin-like protein 6A	ACTL6A	0.8303	-0.268295	-1	1.0971	0.133695	0	1.1683	0.224411	1	1.1196	0.162983	-1
P00338	L-lactate dehydrogenase A chain	LDHA	0.95977	-0.0592394	0	0.97798	-0.0321231	0	0.95899	-0.0604123	0	0.99729	-0.00391501	-1
P00367	Glutamate dehydrogenase 1, mitochondrial;Glutamate dehydrogenase 2, mitochondrial	GLUD1	1.2122	0.277628	1	1.1193	0.162597	0	1.2101	0.275126	1	1.0508	0.0714881	-1
P00387	NADH-cytochrome b5 reductase 3;NADH-cytochrome b5 reductase 3 membrane-bound form;NADH-cytochrome b5 reductase 3 soluble form	CYB5R3	1.0637	0.0890913	0	1.0702	0.0978804	0	1.1716	0.22848	1	1.0389	0.0550568	-1
P00390	Glutathione reductase, mitochondrial	GSR	1.093	0.128293	0	0.9849	-0.0219508	0	1.0097	0.0139267	0	1.0778	0.108089	-1
P00403	Cytochrome c oxidase subunit 2	MT-CO2	1.2607	0.334225	1	1.0808	0.1121	0	1.2355	0.305095	1	1.0639	0.0893626	-1
P00441	Superoxide dismutase [Cu-Zn]	SOD1	1.0028	0.0040339	0	1.0387	0.054779	0	1.0018	0.00259452	0	1.0159	0.0227584	-1
P00491	Purine nucleoside phosphorylase	PNP	0.92453	-0.113208	0	0.87937	-0.185458	0	0.9355	-0.0961904	0	0.90601	-0.142401	-1
P00492	Hypoxanthine-guanine phosphoribosyltransferase	HPRT1	1.0384	0.0543623	0	1.0849	0.117562	0	1.0629	0.0880059	0	1.1755	0.233275	1
P00505	Aspartate aminotransferase, mitochondrial	GOT2	1.0234	0.0333701	0	1.0025	0.00360224	0	1.1116	0.152638	0	0.98398	-0.0232991	-1
P00533	Epidermal growth factor receptor;Receptor protein-tyrosine kinase	EGFR	0.44812	-1.15804	-1	0.4298	-1.21826	-1	1.0522	0.073409	0	1.0584	0.081885	-1
P00558	Phosphoglycerate kinase 1	PGK1	0.95035	-0.0734692	0	0.98593	-0.0204429	0	0.98647	-0.0196529	0	1.0133	0.0190614	-1
Q5T9B7	Adenylate kinase isoenzyme 1	AK1	1.0568	0.0797024	0	1.0215	0.0306892	0	0.99156	-0.012228	0	1.0523	0.0735461	-1
P00966	Argininosuccinate synthase	ASS1	1.1435	0.193456	1	0.99676	-0.00468192	0	1.1514	0.203389	1	0.95623	-0.0645704	-1
P01111	GTPase NRas;GTPase KRas;GTPase KRas, N-terminally processed;GTPase HRas;GTPase HRas, N-terminally processed	NRAS	0.92978	-0.105039	0	1.0275	0.0391384	0	1.1535	0.206018	1	0.93826	-0.0919403	-1
P02545	Prelamin-A/C;Lamin-A/C	LMNA	1.0977	0.134484	0	1.1148	0.156785	0	0.99437	-0.00814532	0	0.96196	-0.0559512	-1
P02786	Transferrin receptor protein 1;Transferrin receptor protein 1, serum form	TFRC	1.062	0.0867838	0	1.0453	0.0639171	0	0.98043	-0.0285135	0	0.95738	-0.0628364	-1
P02794	Ferritin heavy chain;Ferritin heavy chain, N-terminally processed;Ferritin	FTH1	1.4856	0.571046	1	1.6602	0.731357	1	0.97487	-0.0367182	0	1.0533	0.0749164	-1
P04040	Catalase	CAT	0.84561	-0.241936	0	0.86108	-0.215781	0	0.87174	-0.19803	-1	0.74845	-0.418022	0
P04062	Glucosylceramidase	GBA	0.9254	-0.111851	0	1.0316	0.0448837	0	0.92085	-0.118962	0	0.82794	-0.272402	0
P04075	Fructose-bisphosphate aldolase A;Fructose-bisphosphate aldolase	ALDOA	0.98992	-0.0146162	0	0.99773	-0.00327864	0	0.94634	-0.0795695	0	0.95733	-0.0629118	-1
P04080	Cystatin-B	CSTB	1.0697	0.0972062	0	1.0175	0.0250288	0	0.97391	-0.0381396	0	0.97822	-0.0317691	-1
P04083	Annexin A1	ANXA1	0.98837	-0.0168769	0	0.96437	-0.0523413	0	0.94402	-0.0831107	0	0.90691	-0.140969	-1
P04179	Superoxide dismutase [Mn], mitochondrial	SOD2	1.2442	0.315218	1	1.2838	0.36042	1	1.174	0.231432	1	1.0315	0.0447438	-1
P04350	Tubulin beta-4A chain	TUBB4A	0.71497	-0.484045	-1	0.80713	-0.309127	-1	0.86593	-0.207678	-1	0.96546	-0.0507116	-1
P04406	Glyceraldehyde-3-phosphate dehydrogenase	GAPDH	1.0345	0.0489336	0	1.1069	0.146525	0	0.95204	-0.0709059	0	1.0207	0.0295589	-1
P04792	Heat shock protein beta-1	HSPB1	0.92879	-0.106576	0	1.0394	0.055751	0	0.72682	-0.46033	-1	0.80424	-0.314302	0
P04818	Thymidylate synthase	TYMS	0.87958	-0.185113	0	0.84153	-0.248913	0	0.80308	-0.316384	-1	0.86122	-0.215546	-1
P04843	Dolichyl-diphosphooligosaccharide--protein glycosyltransferase subunit 1	RPN1	1.007	0.0100637	0	0.98741	-0.0182788	0	1.0248	0.0353424	0	0.99493	-0.00733307	-1
P04844	Dolichyl-diphosphooligosaccharide--protein glycosyltransferase subunit 2	RPN2	1.0412	0.0582472	0	0.99769	-0.00333648	0	1.078	0.108357	0	0.98547	-0.0211161	-1
P04899	Guanine nucleotide-binding protein G(i) subunit alpha-2	GNAI2	0.97644	-0.0343967	0	1.0609	0.0852887	0	1.1222	0.16633	0	0.93956	-0.0899428	-1
Q93077	Histone H2A type 1-C;Histone H2A type 3;Histone H2A type 1-B/E	HIST1H2AC	0.805	-0.312939	-1	0.83314	-0.263369	-1	0.96823	-0.0465783	0	1.0025	0.00360224	-1
P05023	Sodium/potassium-transporting ATPase subunit alpha-1	ATP1A1	1.018	0.0257376	0	1.0222	0.0316775	0	0.94949	-0.0747753	0	0.92796	-0.107865	-1
P05026	Sodium/potassium-transporting ATPase subunit beta-1	ATP1B1	0.93723	-0.093525	0	0.90142	-0.149729	0	1.0105	0.0150693	0	0.89243	-0.164189	-1
P05091	Aldehyde dehydrogenase, mitochondrial	ALDH2	1.0011	0.00158609	0	1.0201	0.0287106	0	1.0841	0.116498	0	0.98013	-0.028955	-1
P05114	Non-histone chromosomal protein HMG-14	HMGN1	0.85582	-0.224621	0	0.97517	-0.0362744	0	0.97883	-0.0308698	0	0.91731	-0.124519	-1
P05141	ADP/ATP translocase 2;ADP/ATP translocase 2, N-terminally processed	SLC25A5	1.1011	0.138945	0	1.0619	0.0866479	0	1.1092	0.14952	0	1.0215	0.0306892	-1
P05187	Alkaline phosphatase, placental type	ALPP	1.1399	0.188907	0	1.3252	0.40621	1	0.93337	-0.099479	0	1.0344	0.0487942	-1
P05198	Eukaryotic translation initiation factor 2 subunit 1	EIF2S1	0.96649	-0.0491733	0	0.98454	-0.0224783	0	1.0438	0.0618453	0	1.0498	0.0701145	-1
P05204	Non-histone chromosomal protein HMG-17	HMGN2	1.0494	0.0695647	0	1.081	0.112367	0	1.0689	0.0961269	0	0.96473	-0.0518029	-1
P05386	60S acidic ribosomal protein P1	RPLP1	0.97726	-0.0331857	0	0.94421	-0.0828203	0	1.0573	0.0803848	0	1.0024	0.00345832	-1
P05387	60S acidic ribosomal protein P2	RPLP2	0.89907	-0.153495	0	0.93241	-0.100964	0	0.9832	-0.0244432	0	0.99147	-0.012359	-1
P05388	60S acidic ribosomal protein P0;60S acidic ribosomal protein P0-like	RPLP0	0.93434	-0.0979805	0	0.96818	-0.0466528	0	1.0448	0.0632268	0	0.99564	-0.0063039	-1
P05455	Lupus La protein	SSB	1.1201	0.163628	0	1.038	0.0538064	0	1.175	0.232661	1	1.0806	0.111833	-1
P05556	Integrin beta-1	ITGB1	1.211	0.276199	1	1.1853	0.245252	1	1.1243	0.169027	0	1.1211	0.164915	-1
P05783	Keratin, type I cytoskeletal 18	KRT18	1.2899	0.367259	1	1.4111	0.49682	1	0.93514	-0.0967457	0	0.96919	-0.0451486	-1
P05976	Myosin light chain 1/3, skeletal muscle isoform;Myosin light chain 3	MYL1	0.99566	-0.00627492	0	1.0927	0.127897	0	1.0211	0.0301242	0	0.94216	-0.085956	-1
P06132	Uroporphyrinogen decarboxylase	UROD	1.0512	0.0720372	0	1.0373	0.0528332	0	0.91197	-0.132942	0	0.83524	-0.259737	0
P06576	ATP synthase subunit beta, mitochondrial;ATP synthase subunit beta	ATP5B	1.0631	0.0882773	0	1.0267	0.0380147	0	1.0858	0.118758	0	1.0177	0.0253123	-1
P06703	Protein S100-A6;Protein S100	S100A6	1.0969	0.133432	0	1.0998	0.137241	0	0.98578	-0.0206624	0	0.96811	-0.0467571	-1
P06730	Eukaryotic translation initiation factor 4E	EIF4E	0.93149	-0.102388	0	1.0226	0.0322419	0	0.92632	-0.110417	0	0.94988	-0.0741828	-1
P06733	Alpha-enolase	ENO1	1.0621	0.0869196	0	1.0426	0.0601858	0	1.0105	0.0150693	0	1.0211	0.0301242	-1
P06737	Glycogen phosphorylase, liver form;Alpha-1,4 glucan phosphorylase	PYGL	0.92527	-0.112054	0	0.92274	-0.116004	0	0.76356	-0.389187	-1	0.81256	-0.299454	0
P06744	Glucose-6-phosphate isomerase	GPI	0.98078	-0.0279985	0	0.96512	-0.0512198	0	0.99583	-0.00602862	0	1.0099	0.0142124	-1
P06748	Nucleophosmin	NPM1	1.0657	0.0918014	0	1.1098	0.1503	0	1.0854	0.118227	0	1.0542	0.0761486	-1
P06756	Integrin alpha-V;Integrin alpha-V heavy chain;Integrin alpha-V light chain	ITGAV	1.0329	0.0467006	0	1.0162	0.0231844	0	1.0677	0.0945063	0	0.91177	-0.133258	-1
P07099	Epoxide hydrolase 1	EPHX1	0.92947	-0.10552	0	0.80269	-0.317085	-1	1.1817	0.240864	1	0.95671	-0.0638464	-1
P07108	Acyl-CoA-binding protein	DBI	0.97146	-0.0417735	0	0.94539	-0.0810185	0	0.93819	-0.092048	0	0.96756	-0.047577	-1
P07237	Protein disulfide-isomerase	P4HB	1.044	0.0621217	0	1.0124	0.0177794	0	0.96488	-0.0515786	0	0.90231	-0.148305	-1
P07355	Annexin A2;Annexin	ANXA2	1.0774	0.107554	0	1.0506	0.0712135	0	1.0611	0.0855606	0	1.0428	0.0604625	-1
P07384	Calpain-1 catalytic subunit	CAPN1	0.90314	-0.146978	0	0.94265	-0.0852059	0	1.0344	0.0487942	0	1.0398	0.0563061	-1
Q5JP53	Tubulin beta chain	TUBB	0.81833	-0.289245	-1	0.88642	-0.173938	0	0.99581	-0.00605759	0	1.0207	0.0295589	-1
P07602	Prosaposin;Saposin-A;Saposin-B-Val;Saposin-B;Saposin-C;Saposin-D	PSAP	1.11	0.15056	0	1.0323	0.0458623	0	1.0424	0.059909	0	0.97699	-0.0335843	-1
P07737	Profilin-1	PFN1	0.95092	-0.0726041	0	0.96074	-0.057782	0	1.0083	0.0119249	0	1.0376	0.0532504	-1
P07741	Adenine phosphoribosyltransferase	APRT	0.75776	-0.400187	-1	0.85615	-0.224065	0	0.93038	-0.104108	0	0.97841	-0.0314889	-1
P07814	Bifunctional glutamate/proline--tRNA ligase;Glutamate--tRNA ligase;Proline--tRNA ligase	EPRS	1.0453	0.0639171	0	1.0517	0.0727232	0	1.0279	0.0396999	0	1.0329	0.0467006	-1
P07900	Heat shock protein HSP 90-alpha	HSP90AA1	0.98915	-0.0157388	0	1.0341	0.0483757	0	0.98043	-0.0285135	0	0.99776	-0.00323526	-1
P07919	Cytochrome b-c1 complex subunit 6, mitochondrial	UQCRH	1.0176	0.0251706	0	1.1631	0.217975	1	0.98406	-0.0231818	0	1.0672	0.0938306	-1
P07954	Fumarate hydratase, mitochondrial	FH	0.93441	-0.0978724	0	0.96993	-0.0440475	0	1.0839	0.116232	0	1.0399	0.0564448	-1
P08047	Transcription factor Sp1	SP1	0.8858	-0.174947	0	1.0029	0.00417776	0	1.0885	0.122341	0	0.93719	-0.0935865	-1
P08133	Annexin A6;Annexin	ANXA6	0.9974	-0.00375589	0	0.93296	-0.100113	0	1.0517	0.0727232	0	1.0176	0.0251706	-1
P08238	Heat shock protein HSP 90-beta	HSP90AB1	0.94554	-0.0807896	0	0.9739	-0.0381545	0	0.9923	-0.0111517	0	1.0341	0.0483757	-1
P08240	Signal recognition particle receptor subunit alpha	SRPR	1.0918	0.126709	0	1.0708	0.098689	0	0.91232	-0.132388	0	0.87358	-0.194988	-1
P08243	Asparagine synthetase [glutamine-hydrolyzing]	ASNS	1.1512	0.203138	1	1.0291	0.0413832	0	1.0537	0.0754642	0	1.0315	0.0447438	-1
P08559	Pyruvate dehydrogenase E1 component subunit alpha, somatic form, mitochondrial	PDHA1	1.1207	0.1644	0	1.1847	0.244522	1	1.1677	0.22367	1	1.1102	0.15082	-1
P08574	Cytochrome c1, heme protein, mitochondrial	CYC1	1.1307	0.177216	0	1.1409	0.190172	1	1.0528	0.0742314	0	1.065	0.0908534	-1
P08621	U1 small nuclear ribonucleoprotein 70 kDa	SNRNP70	1.0728	0.101381	0	0.97406	-0.0379175	0	1.0789	0.109561	0	1.014	0.0200577	-1
P08670	Vimentin	VIM	1.0271	0.0385767	0	0.92546	-0.111757	0	1.0167	0.023894	0	0.89081	-0.16681	-1
P08754	Guanine nucleotide-binding protein G(k) subunit alpha	GNAI3	1.0166	0.0237521	0	0.9326	-0.10067	0	1.069	0.0962619	0	1.0186	0.0265876	-1
P08758	Annexin A5;Annexin	ANXA5	1.0318	0.0451634	0	0.95668	-0.0638917	0	1.045	0.0635029	0	0.98953	-0.0151846	-1
P09012	U1 small nuclear ribonucleoprotein A	SNRPA	1.0583	0.0817487	0	0.9813	-0.0272338	0	0.96431	-0.0524311	0	1.0267	0.0380147	-1
P09104	Gamma-enolase;Enolase	ENO2	1.0412	0.0582472	0	0.94559	-0.0807133	0	0.78537	-0.348556	-1	0.7926	-0.335335	0
P09110	3-ketoacyl-CoA thiolase, peroxisomal	ACAA1	0.97774	-0.0324772	0	0.98394	-0.0233578	0	0.95599	-0.0649326	0	1.0101	0.0144981	-1
P09234	U1 small nuclear ribonucleoprotein C	SNRPC	1.0501	0.0705267	0	1.0659	0.0920721	0	1.0217	0.0309716	0	1.0561	0.0787464	-1
P09382	Galectin-1	LGALS1	0.90562	-0.143022	0	0.85851	-0.220093	0	0.94036	-0.0887149	0	0.83598	-0.25846	0
P09429	High mobility group protein B1	HMGB1	0.95125	-0.0721035	0	0.98956	-0.0151409	0	1.0334	0.0473988	0	1.02	0.0285692	-1
P09496	Clathrin light chain A	CLTA	0.90177	-0.149169	0	0.90902	-0.137616	0	0.96864	-0.0459675	0	0.94937	-0.0749576	-1
P09497	Clathrin light chain B	CLTB	1.0219	0.031254	0	0.99275	-0.0104976	0	1.1355	0.183328	1	0.90645	-0.141701	-1
P09525	Annexin A4;Annexin	ANXA4	1.1077	0.147567	0	1.1551	0.208018	1	0.92975	-0.105085	0	0.92126	-0.11832	-1
P09543	2,3-cyclic-nucleotide 3-phosphodiesterase	CNP	0.92947	-0.10552	0	0.90393	-0.145717	0	0.89391	-0.161799	0	1.1748	0.232415	1
P09622	Dihydrolipoyl dehydrogenase, mitochondrial;Dihydrolipoyl dehydrogenase	DLD	1.0524	0.0736832	0	0.98675	-0.0192435	0	1.1324	0.179384	1	1.0539	0.075738	-1
P09651	Heterogeneous nuclear ribonucleoprotein A1;Heterogeneous nuclear ribonucleoprotein A1, N-terminally processed	HNRNPA1	1.0608	0.0851527	0	1.0592	0.082975	0	1.0604	0.0846086	0	1.0408	0.0576929	-1
P09661	U2 small nuclear ribonucleoprotein A	SNRPA1	0.85945	-0.218514	0	1.052	0.0731347	0	0.98218	-0.0259406	0	1.0267	0.0380147	-1
P09874	Poly [ADP-ribose] polymerase 1	PARP1	1.1206	0.164271	0	1.0356	0.0504669	0	1.1181	0.161049	0	1.0192	0.0274372	-1
P09960	Leukotriene A-4 hydrolase	LTA4H	0.92616	-0.110667	0	0.9043	-0.145127	0	0.99656	-0.00497143	0	0.9844	-0.0226834	-1
P09972	Fructose-bisphosphate aldolase C;Fructose-bisphosphate aldolase	ALDOC	1.5244	0.608242	1	1.131	0.177599	0	1.0155	0.0221902	0	0.99946	-0.000779266	-1
Q71UI9	Histone H2A.V;Histone H2A.Z;Histone H2A	H2AFV	0.96379	-0.0532093	0	0.93531	-0.0964835	0	1.0541	0.0760117	0	0.96809	-0.0467869	-1
P0CG12	Chromosome transmission fidelity protein 8 homolog isoform 2	CHTF8	1.7493	0.806778	1	2.4128	1.27071	1	0.56733	-0.81774	-1	0.80157	-0.3191	0
P0DN76	Splicing factor U2AF 35 kDa subunit;Splicing factor U2AF 26 kDa subunit	U2AF1	1.1238	0.168385	0	1.1733	0.230572	1	1.092	0.126973	0	1.046	0.0648829	-1
P0DN79	Cystathionine beta-synthase	CBS	0.71101	-0.492058	-1	0.68848	-0.538513	-1	0.76698	-0.382739	-1	0.77678	-0.364422	0
P0DP25		CALM2	1.0131	0.0187766	0	1.0055	0.00791308	0	0.97922	-0.0302951	0	1.015	0.0214797	-1
P10412	Histone H1.4;Histone H1.3	HIST1H1E	0.67029	-0.577143	-1	0.74235	-0.429829	-1	0.92544	-0.111789	0	0.94308	-0.0845479	-1
P10515	Dihydrolipoyllysine-residue acetyltransferase component of pyruvate dehydrogenase complex, mitochondrial;Acetyltransferase component of pyruvate dehydrogenase complex	DLAT	1.0162	0.0231844	0	0.90469	-0.144505	0	1.0662	0.0924781	0	1.128	0.173767	-1
P10586	Receptor-type tyrosine-protein phosphatase F	PTPRF	1.1713	0.228111	1	1.1371	0.185359	1	0.78684	-0.345858	-1	0.92646	-0.110199	-1
P10599	Thioredoxin	TXN	0.97702	-0.03354	0	1.013	0.0186342	0	0.98792	-0.0175339	0	1.0145	0.0207689	-1
P10606	Cytochrome c oxidase subunit 5B, mitochondrial	COX5B	1.0784	0.108892	0	1.1537	0.206268	1	1.097	0.133564	0	1.0218	0.0311128	-1
X6R5C5	Carboxypeptidase;Lysosomal protective protein;Lysosomal protective protein 32 kDa chain;Lysosomal protective protein 20 kDa chain	CTSA	1.1349	0.182565	0	1.1415	0.190931	1	0.96045	-0.0582176	0	0.87681	-0.189664	-1
P10620	Microsomal glutathione S-transferase 1	MGST1	0.99024	-0.0141499	0	0.99098	-0.0130722	0	0.89376	-0.162041	0	0.93452	-0.0977026	-1
P10644	cAMP-dependent protein kinase type I-alpha regulatory subunit;cAMP-dependent protein kinase type I-alpha regulatory subunit, N-terminally processed	PRKAR1A	0.83668	-0.257252	-1	0.72997	-0.454091	-1	1.0319	0.0453032	0	1.0684	0.0954519	-1
X6RA14	S-formylglutathione hydrolase	ESD	0.862	-0.21424	0	1.006	0.00863031	0	1.0033	0.00475306	0	1.0421	0.0594937	-1
P10809	60 kDa heat shock protein, mitochondrial	HSPD1	1.0389	0.0550568	0	1.0166	0.0237521	0	1.0683	0.0953168	0	1.0356	0.0504669	-1
P10909	Clusterin;Clusterin beta chain;Clusterin alpha chain;Clusterin	CLU	1.0552	0.0775165	0	0.99386	-0.00888545	0	0.64143	-0.640636	-1	0.60008	-0.736773	0
P11021	78 kDa glucose-regulated protein	HSPA5	0.93639	-0.0948186	0	0.99114	-0.0128392	0	0.91568	-0.127085	0	0.86904	-0.202506	-1
P11047	Laminin subunit gamma-1	LAMC1	1.4616	0.547549	1	1.4314	0.517427	1	1.068	0.0949116	0	1.0616	0.0862403	-1
P11172	Uridine 5-monophosphate synthase;Orotate phosphoribosyltransferase;Orotidine 5-phosphate decarboxylase	UMPS	1.0597	0.0836559	0	1.0415	0.0586628	0	1.1313	0.177982	1	1.1253	0.17031	-1
P11177	Pyruvate dehydrogenase E1 component subunit beta, mitochondrial	PDHB	1.0962	0.132511	0	1.0272	0.0387171	0	1.1987	0.261471	1	1.0255	0.0363275	-1
P11233	Ras-related protein Ral-A	RALA	1.0254	0.0361868	0	1.0109	0.0156403	0	1.028	0.0398403	0	1.0006	0.000865357	-1
P11279	Lysosome-associated membrane glycoprotein 1	LAMP1	1.1446	0.194844	1	1.1235	0.168	0	0.9944	-0.0081018	0	1.1736	0.230941	1
P11387	DNA topoisomerase 1	TOP1	1.0334	0.0473988	0	0.86076	-0.216317	0	1.0049	0.00705194	0	0.88579	-0.174963	-1
P11388	DNA topoisomerase 2-alpha	TOP2A	0.81815	-0.289563	-1	0.77972	-0.358972	-1	1.1193	0.162597	0	1.0482	0.067914	-1
P11413	Glucose-6-phosphate 1-dehydrogenase	G6PD	0.99571	-0.00620248	0	1.0543	0.0762854	0	0.97527	-0.0361264	0	0.96847	-0.0462207	-1
P11498	Pyruvate carboxylase, mitochondrial	PC	1.4301	0.516116	1	1.2857	0.362554	1	1.3256	0.406646	1	1.2625	0.336283	1
P11586	C-1-tetrahydrofolate synthase, cytoplasmic;Methylenetetrahydrofolate dehydrogenase;Methenyltetrahydrofolate cyclohydrolase;Formyltetrahydrofolate synthetase;C-1-tetrahydrofolate synthase, cytoplasmic, N-terminally processed	MTHFD1	0.96077	-0.057737	0	0.94163	-0.0867678	0	0.98481	-0.0220827	0	0.96772	-0.0473384	-1
P11717	Cation-independent mannose-6-phosphate receptor	IGF2R	1.0808	0.1121	0	1.0248	0.0353424	0	0.82924	-0.270138	-1	0.85324	-0.228976	-1
P11766	Alcohol dehydrogenase class-3	ADH5	1.0623	0.0871912	0	1.0723	0.100709	0	0.94512	-0.0814306	0	1.0331	0.0469799	-1
P11802	Cyclin-dependent kinase 4	CDK4	1.0952	0.131194	0	0.85743	-0.221909	0	0.75076	-0.413576	-1	1.044	0.0621217	-1
P11908	Ribose-phosphate pyrophosphokinase 2	PRPS2	0.91766	-0.123968	0	1.0219	0.031254	0	1.067	0.0935602	0	0.97159	-0.0415805	-1
P11940	Polyadenylate-binding protein 1;Polyadenylate-binding protein	PABPC1	0.9009	-0.150561	0	0.87402	-0.194262	0	0.94668	-0.0790513	0	0.94081	-0.0880247	-1
P12004	Proliferating cell nuclear antigen	PCNA	0.93563	-0.09599	0	0.90447	-0.144855	0	1.0821	0.113834	0	0.96901	-0.0454165	-1
P12081	Histidine--tRNA ligase, cytoplasmic	HARS	0.95631	-0.0644497	0	0.92527	-0.112054	0	1.0533	0.0749164	0	1.023	0.0328061	-1
P12236	ADP/ATP translocase 3;ADP/ATP translocase 3, N-terminally processed	SLC25A6	1.1136	0.155231	0	1.0762	0.105946	0	1.1527	0.205017	1	1.0582	0.0816123	-1
P12268	Inosine-5-monophosphate dehydrogenase 2	IMPDH2	1.0222	0.0316775	0	1.0871	0.120485	0	0.83583	-0.258719	-1	0.83861	-0.253928	0
P12270	Nucleoprotein TPR	TPR	0.85401	-0.227675	0	0.82719	-0.273709	-1	1.0899	0.124196	0	0.98948	-0.0152575	-1
P12277	Creatine kinase B-type	CKB	1.02	0.0285692	0	0.99812	-0.00271482	0	0.87282	-0.196244	-1	0.9028	-0.147522	-1
P12429	Annexin A3;Annexin	ANXA3	1.0534	0.0750534	0	1.042	0.0593553	0	0.98288	-0.0249128	0	1.0072	0.0103502	-1
P12532	Creatine kinase U-type, mitochondrial	CKMT1A	1.1966	0.258941	1	1.0577	0.0809305	0	1.2082	0.272859	1	1.0797	0.110631	-1
P12814	Alpha-actinin-1	ACTN1	0.94681	-0.0788532	0	0.97655	-0.0342342	0	1.022	0.0313952	0	1.0125	0.0179219	-1
P12955	Xaa-Pro dipeptidase	PEPD	1.0093	0.0133551	0	1.019	0.0271541	0	1.0094	0.013498	0	0.94008	-0.0891446	-1
P12956	X-ray repair cross-complementing protein 6	XRCC6	0.9952	-0.00694161	0	0.98423	-0.0229326	0	1.0938	0.129349	0	1.067	0.0935602	-1
P13010	X-ray repair cross-complementing protein 5	XRCC5	1.0393	0.0556122	0	0.99523	-0.00689812	0	1.1231	0.167486	0	1.0664	0.0927487	-1
P13073	Cytochrome c oxidase subunit 4 isoform 1, mitochondrial	COX4I1	1.1077	0.147567	0	1.0346	0.0490731	0	1.031	0.0440443	0	0.96269	-0.0548568	-1
P13489	Ribonuclease inhibitor	RNH1	1.0134	0.0192037	0	0.98476	-0.0221559	0	1.0283	0.0402612	0	0.99873	-0.00183339	-1
P13639	Elongation factor 2	EEF2	0.89851	-0.154394	0	0.94411	-0.0829731	0	0.94994	-0.0740917	0	0.99273	-0.0105267	-1
P13667	Protein disulfide-isomerase A4	PDIA4	0.95277	-0.0698001	0	0.84174	-0.248553	0	1.0291	0.0413832	0	0.90001	-0.151987	-1
P13693	Translationally-controlled tumor protein	TPT1	0.93041	-0.104061	0	1.0556	0.0780633	0	0.9469	-0.078716	0	1.0797	0.110631	-1
P13797	Plastin-3	PLS3	1.0841	0.116498	0	1.0743	0.103397	0	1.0514	0.0723116	0	1.0317	0.0450235	-1
P13804	Electron transfer flavoprotein subunit alpha, mitochondrial	ETFA	0.93312	-0.0998655	0	0.87622	-0.190635	0	1.0109	0.0156403	0	0.92609	-0.110776	-1
P13807	Glycogen [starch] synthase, muscle	GYS1	1.0035	0.00504062	0	1.0341	0.0483757	0	0.66806	-0.58195	-1	0.87975	-0.184834	-1
P13861	cAMP-dependent protein kinase type II-alpha regulatory subunit	PRKAR2A	0.75128	-0.412577	-1	0.96091	-0.0575268	0	0.97181	-0.0412538	0	0.93433	-0.0979959	-1
P13984	General transcription factor IIF subunit 2	GTF2F2	0.94588	-0.0802709	0	1.0024	0.00345832	0	1.1277	0.173383	0	1.043	0.0607392	-1
P14174	Macrophage migration inhibitory factor	MIF	1.0296	0.042084	0	1.0202	0.028852	0	1.0092	0.0132121	0	1.0289	0.0411028	-1
P14324	Farnesyl pyrophosphate synthase	FDPS	0.96401	-0.05288	0	0.95978	-0.0592243	0	0.78316	-0.352621	-1	0.79136	-0.337594	0
P14384	Carboxypeptidase M	CPM	0.83804	-0.254909	-1	0.98618	-0.0200771	0	0.80244	-0.317535	-1	0.92353	-0.114769	-1
P14550	Alcohol dehydrogenase [NADP(+)]	AKR1A1	1.1336	0.180912	0	1.0138	0.0197731	0	0.71201	-0.490031	-1	0.72581	-0.462336	0
P14618	Pyruvate kinase PKM;Pyruvate kinase	PKM	1.0381	0.0539454	0	1.0446	0.0629506	0	0.96483	-0.0516533	0	0.95514	-0.0662159	-1
P14625	Endoplasmin	HSP90B1	0.93709	-0.0937405	0	0.91437	-0.12915	0	0.9997	-0.000432873	0	0.91372	-0.130176	-1
P14678	Small nuclear ribonucleoprotein-associated proteins B and B	SNRPB	1.0761	0.105812	0	0.98433	-0.022786	0	1.0181	0.0258793	0	0.9651	-0.0512497	-1
P14854	Cytochrome c oxidase subunit 6B1	COX6B1	1.111	0.151859	0	1.0325	0.0461418	0	1.1177	0.160533	0	0.99528	-0.00682564	-1
P14866	Heterogeneous nuclear ribonucleoprotein L	HNRNPL	1.1171	0.159758	0	1.0938	0.129349	0	1.0374	0.0529723	0	0.99271	-0.0105558	-1
P14868	Aspartate--tRNA ligase, cytoplasmic	DARS	0.97487	-0.0367182	0	0.93586	-0.0956354	0	1.0708	0.098689	0	1.0702	0.0978804	-1
P14923	Junction plakoglobin	JUP	0.99882	-0.00170339	0	1.0013	0.00187429	0	1.0706	0.0984196	0	1.0308	0.0437644	-1
P14927	Cytochrome b-c1 complex subunit 7	UQCRB	1.1652	0.220578	1	1.0655	0.0915306	0	1.1745	0.232047	1	1.0443	0.0625362	-1
P15121	Aldose reductase	AKR1B1	0.97566	-0.0355496	0	0.95337	-0.0688919	0	1.0813	0.112767	0	1.0599	0.0839282	-1
P15170	Eukaryotic peptide chain release factor GTP-binding subunit ERF3A	GSPT1	0.9226	-0.116223	0	0.96323	-0.0540478	0	1.0252	0.0359054	0	1.1119	0.153027	-1
P15374	Ubiquitin carboxyl-terminal hydrolase isozyme L3;Ubiquitin carboxyl-terminal hydrolase	UCHL3	0.83255	-0.264391	-1	0.82225	-0.282351	-1	1.127	0.172488	0	1.0376	0.0532504	-1
P15531	Nucleoside diphosphate kinase A	NME1	1.0589	0.0825664	0	0.95203	-0.0709211	0	1.0629	0.0880059	0	1.0791	0.109829	-1
P15880	40S ribosomal protein S2	RPS2	0.98139	-0.0271015	0	0.9692	-0.0451337	0	0.97952	-0.0298531	0	0.99382	-0.00894352	-1
P15924	Desmoplakin	DSP	0.8186	-0.288769	-1	0.90213	-0.148593	0	0.92854	-0.106964	0	0.9566	-0.0640123	-1
P15927	Replication protein A 32 kDa subunit	RPA2	0.92648	-0.110168	0	0.8782	-0.187379	0	1.0203	0.0289934	0	0.98283	-0.0249862	-1
Q5TD07	Ribosyldihydronicotinamide dehydrogenase [quinone]	NQO2	0.97861	-0.0311941	0	1.1495	0.201006	1	1.0522	0.073409	0	1.1808	0.239765	1
P16144	Integrin beta-4	ITGB4	1.0101	0.0144981	0	0.86041	-0.216904	0	0.81012	-0.303792	-1	0.69516	-0.524583	0
P16152	Carbonyl reductase [NADPH] 1	CBR1	1.0441	0.0622599	0	1.058	0.0813396	0	0.94196	-0.0862623	0	0.9329	-0.100206	-1
P16401	Histone H1.5	HIST1H1B	0.77602	-0.365834	-1	0.786	-0.347399	-1	0.99324	-0.00978573	0	0.93451	-0.097718	-1
P16403	Histone H1.2	HIST1H1C	0.54062	-0.887313	-1	0.52823	-0.920762	-1	0.84884	-0.236435	-1	0.89974	-0.15242	-1
P16435	NADPH--cytochrome P450 reductase	POR	1.0685	0.0955869	0	1.055	0.077243	0	1.1362	0.184217	1	1.0719	0.10017	-1
P16615	Sarcoplasmic/endoplasmic reticulum calcium ATPase 2	ATP2A2	0.98165	-0.0267194	0	1.035	0.0496308	0	0.92778	-0.108145	0	0.94888	-0.0757024	-1
P16949	Stathmin	STMN1	0.95393	-0.0680447	0	0.88483	-0.176528	0	0.92469	-0.112958	0	0.90596	-0.142481	-1
P16989	Y-box-binding protein 3	YBX3	0.84842	-0.237149	0	0.96947	-0.0447318	0	0.81817	-0.289527	-1	0.9466	-0.0791732	-1
P17066	Heat shock 70 kDa protein 6	HSPA6	0.95223	-0.070618	0	0.91351	-0.130508	0	0.90807	-0.139125	0	68.943	6.10733	1
P17096	High mobility group protein HMG-I/HMG-Y	HMGA1	1.0401	0.0567222	0	1.0484	0.0681893	0	0.84377	-0.245078	-1	0.97266	-0.0399925	-1
P17174	Aspartate aminotransferase, cytoplasmic	GOT1	0.84444	-0.243933	-1	0.81947	-0.287237	-1	0.88393	-0.177996	0	0.87451	-0.193453	-1
P17612	cAMP-dependent protein kinase catalytic subunit alpha	PRKACA	0.83532	-0.259599	-1	0.74578	-0.423178	-1	1.0394	0.055751	0	1.0548	0.0769695	-1
P17655	Calpain-2 catalytic subunit	CAPN2	0.98646	-0.0196675	0	1.0287	0.0408223	0	1.0284	0.0404015	0	0.98643	-0.0197114	-1
P17844	Probable ATP-dependent RNA helicase DDX5	DDX5	0.78086	-0.356864	-1	0.79256	-0.335408	-1	1.0217	0.0309716	0	1.0035	0.00504062	-1
P17858	ATP-dependent 6-phosphofructokinase, liver type	PFKL	0.88382	-0.178176	0	0.97099	-0.0424717	0	0.7999	-0.322108	-1	0.83011	-0.268626	0
P17931	Galectin-3;Galectin	LGALS3	1.0431	0.0608775	0	1.1521	0.204266	1	0.94497	-0.0816596	0	1.0276	0.0392788	-1
P17987	T-complex protein 1 subunit alpha	TCP1	0.93742	-0.0932325	0	0.98621	-0.0200332	0	1.0358	0.0507455	0	1.033	0.0468403	-1
P18077	60S ribosomal protein L35a	RPL35A	1.0004	0.000576963	0	0.96878	-0.045759	0	0.99924	-0.00109687	0	0.98443	-0.0226395	-1
P18085	ADP-ribosylation factor 4	ARF4	1.0212	0.0302654	0	0.95077	-0.0728317	0	0.90932	-0.13714	0	0.90631	-0.141923	-1
P18124	60S ribosomal protein L7	RPL7	0.92442	-0.11338	0	1.0117	0.0167816	0	1.0143	0.0204844	0	0.95533	-0.0659289	-1
P18206	Vinculin	VCL	1.1034	0.141956	0	1.1258	0.170951	0	0.96007	-0.0587885	0	0.9999	-0.000144277	-1
P18583	Protein SON	SON	0.84641	-0.240571	0	0.91846	-0.122711	0	1.1772	0.235359	1	1.0816	0.113167	-1
P18669	Phosphoglycerate mutase 1	PGAM1	0.98604	-0.0202819	0	0.95441	-0.0673189	0	1.0329	0.0467006	0	1.0301	0.0427844	-1
P18754	Regulator of chromosome condensation	RCC1	1.104	0.14274	0	1.0685	0.0955869	0	1.0327	0.0464212	0	1.0095	0.0136409	-1
P18859	ATP synthase-coupling factor 6, mitochondrial	ATP5J	1.0157	0.0224743	0	1.0946	0.130404	0	1.042	0.0593553	0	1.007	0.0100637	-1
P19338	Nucleolin	NCL	1.1108	0.151599	0	1.108	0.147958	0	1.0845	0.11703	0	1.0487	0.068602	-1
P19367	Hexokinase-1	HK1	1.2184	0.284988	1	0.99181	-0.0118643	0	1.1637	0.218719	1	1.0016	0.00230647	-1
P19387	DNA-directed RNA polymerase II subunit RPB3	POLR2C	0.92364	-0.114597	0	0.8548	-0.226341	0	1.0511	0.0718999	0	0.87518	-0.192348	-1
P19525	Interferon-induced, double-stranded RNA-activated protein kinase	EIF2AK2	0.86049	-0.21677	0	0.85969	-0.218112	0	1.1582	0.211884	1	1.1244	0.169155	-1
P19623	Spermidine synthase	SRM	0.96316	-0.0541526	0	1.0443	0.0625362	0	0.94129	-0.0872888	0	1.0703	0.0980152	-1
P19784	Casein kinase II subunit alpha	CSNK2A2	1.0146	0.0209111	0	1.1795	0.238175	1	1.0935	0.128953	0	1.0037	0.00532812	-1
P20020	Plasma membrane calcium-transporting ATPase 1;Calcium-transporting ATPase	ATP2B1	1.1052	0.144307	0	1.1074	0.147176	0	0.9876	-0.0180013	0	1.0154	0.0220482	-1
P20042	Eukaryotic translation initiation factor 2 subunit 2	EIF2S2	0.9974	-0.00375589	0	0.95053	-0.0731959	0	1.0214	0.030548	0	1.0227	0.032383	-1
P20073	Annexin A7	ANXA7	0.97692	-0.0336877	0	0.94603	-0.0800422	0	1.1338	0.181166	1	0.92368	-0.114535	-1
P20290	Transcription factor BTF3	BTF3	1.0208	0.0297002	0	0.98545	-0.0211454	0	1.0235	0.0335111	0	1.038	0.0538064	-1
P20340	Ras-related protein Rab-6A	RAB6A	0.91179	-0.133227	0	0.90845	-0.138521	0	1.0256	0.0364682	0	0.89537	-0.159444	-1
P20618	Proteasome subunit beta type-1	PSMB1	0.98	-0.0291463	0	1.0319	0.0453032	0	1.0404	0.0571383	0	1.0285	0.0405418	-1
P20645	Cation-dependent mannose-6-phosphate receptor	M6PR	1.1504	0.202136	1	1.0533	0.0749164	0	1.0963	0.132643	0	1.0714	0.0994972	-1
P20674	Cytochrome c oxidase subunit 5A, mitochondrial	COX5A	1.0603	0.0844725	0	0.99526	-0.00685463	0	1.0807	0.111966	0	1.0066	0.0094905	-1
P20700	Lamin-B1	LMNB1	0.93444	-0.0978261	0	0.88367	-0.17842	0	1.1228	0.167101	0	1.0429	0.0606008	-1
P20839	Inosine-5-monophosphate dehydrogenase 1;Inosine-5-monophosphate dehydrogenase	IMPDH1	0.91294	-0.131408	0	0.92759	-0.108441	0	0.96046	-0.0582026	0	0.92265	-0.116145	-1
P20962	Parathymosin	PTMS	0.79081	-0.338597	-1	0.75898	-0.397866	-1	0.98116	-0.0274397	0	0.9209	-0.118884	-1
P21266	Glutathione S-transferase Mu 3	GSTM3	0.93535	-0.0964218	0	0.9828	-0.0250302	0	0.84585	-0.241526	-1	0.88909	-0.169599	-1
P21281	V-type proton ATPase subunit B, brain isoform	ATP6V1B2	1.0267	0.0380147	0	1.0647	0.090447	0	0.9439	-0.0832941	0	1.041	0.0579701	-1
P21283	V-type proton ATPase subunit C 1	ATP6V1C1	1.0516	0.072586	0	0.98717	-0.0186295	0	0.98522	-0.0214822	0	0.96408	-0.0527752	-1
P21291	Cysteine and glycine-rich protein 1	CSRP1	1.058	0.0813396	0	1.0416	0.0588014	0	0.99741	-0.00374143	0	1.0412	0.0582472	-1
P21333	Filamin-A	FLNA	0.86913	-0.202356	0	0.92876	-0.106622	0	0.8523	-0.230567	-1	0.89979	-0.15234	-1
P21399	Cytoplasmic aconitate hydratase	ACO1	1.1563	0.209516	1	1.0664	0.0927487	0	1.0251	0.0357647	0	1.0669	0.093425	-1
P21796	Voltage-dependent anion-selective channel protein 1	VDAC1	1.0845	0.11703	0	1.0208	0.0297002	0	1.1025	0.140779	0	1.031	0.0440443	-1
P21964	Catechol O-methyltransferase	COMT	1.1844	0.244156	1	1.1586	0.212383	1	1.1424	0.192068	1	1.0066	0.0094905	-1
P22059	Oxysterol-binding protein 1	OSBP	0.90651	-0.141605	0	0.86965	-0.201493	0	1.0353	0.0500489	0	0.90426	-0.14519	-1
P22087	rRNA 2-O-methyltransferase fibrillarin	FBL	0.94716	-0.0783199	0	0.97102	-0.0424271	0	0.89291	-0.163413	0	0.96289	-0.0545571	-1
P22102	Trifunctional purine biosynthetic protein adenosine-3;Phosphoribosylamine--glycine ligase;Phosphoribosylformylglycinamidine cyclo-ligase;Phosphoribosylglycinamide formyltransferase	GART	0.95922	-0.0600664	0	0.99945	-0.000793701	0	0.93925	-0.0904189	0	0.9351	-0.0968074	-1
P22234	Multifunctional protein ADE2;Phosphoribosylaminoimidazole-succinocarboxamide synthase;Phosphoribosylaminoimidazole carboxylase	PAICS	0.96694	-0.0485017	0	1.0123	0.0176369	0	0.9785	-0.0313562	0	0.9963	-0.00534787	-1
P22307	Non-specific lipid-transfer protein	SCP2	1.0117	0.0167816	0	1.0179	0.0255958	0	1.0881	0.121811	0	1.1046	0.143524	-1
P22314	Ubiquitin-like modifier-activating enzyme 1	UBA1	1.0085	0.0122111	0	0.96196	-0.0559512	0	0.96777	-0.0472639	0	0.92636	-0.110355	-1
Q32Q12	Nucleoside diphosphate kinase;Nucleoside diphosphate kinase B	NME1-NME2	0.97909	-0.0304866	0	0.97691	-0.0337024	0	0.97745	-0.0329052	0	1.054	0.0758749	-1
P22626	Heterogeneous nuclear ribonucleoproteins A2/B1	HNRNPA2B1	0.93506	-0.0968692	0	0.94612	-0.0799049	0	1.1356	0.183455	1	1.0962	0.132511	-1
P22695	Cytochrome b-c1 complex subunit 2, mitochondrial	UQCRC2	1.1961	0.258338	1	1.0348	0.049352	0	1.1179	0.160791	0	1.0473	0.0666748	-1
P23229	Integrin alpha-6;Integrin alpha-6 heavy chain;Integrin alpha-6 light chain;Processed integrin alpha-6	ITGA6	1.2879	0.365021	1	1.1383	0.186881	1	1.3492	0.432104	1	1.1135	0.155102	-1
P23246	Splicing factor, proline- and glutamine-rich	SFPQ	1.0174	0.024887	0	0.95114	-0.0722704	0	1.0898	0.124063	0	1.0084	0.012068	-1
P23258	Tubulin gamma-1 chain;Tubulin gamma-2 chain	TUBG1	0.75469	-0.406044	-1	0.70694	-0.50034	-1	0.96461	-0.0519823	0	0.94612	-0.0799049	-1
P23284	Peptidyl-prolyl cis-trans isomerase B	PPIB	1.0113	0.016211	0	1.0167	0.023894	0	1.0534	0.0750534	0	0.99618	-0.00552165	-1
P23381	Tryptophan--tRNA ligase, cytoplasmic;T1-TrpRS;T2-TrpRS	WARS	1.0292	0.0415234	0	0.94274	-0.0850682	0	1.0327	0.0464212	0	0.98442	-0.0226541	-1
P23396	40S ribosomal protein S3	RPS3	0.96252	-0.0551116	0	0.99836	-0.00236796	0	0.96611	-0.0497406	0	0.99443	-0.00805827	-1
P23526	Adenosylhomocysteinase	AHCY	0.95866	-0.0609089	0	0.99193	-0.0116898	0	1.0068	0.00977712	0	1.0275	0.0391384	-1
P23528	Cofilin-1	CFL1	0.96033	-0.0583978	0	0.98256	-0.0253826	0	1.0335	0.0475384	0	1.0113	0.016211	-1
P23919	Thymidylate kinase	DTYMK	0.79088	-0.338469	-1	0.83756	-0.255736	0	1.049	0.0690147	0	0.95311	-0.0692854	-1
P23921	Ribonucleoside-diphosphate reductase large subunit	RRM1	0.90202	-0.148769	0	0.85896	-0.219337	0	1.0228	0.0325241	0	1.059	0.0827026	-1
P24534	Elongation factor 1-beta	EEF1B2	0.93567	-0.0959283	0	0.99822	-0.00257029	0	0.92367	-0.114551	0	0.97455	-0.0371919	-1
P24539	ATP synthase F(0) complex subunit B1, mitochondrial	ATP5F1	1.0888	0.122739	0	1.0087	0.0124972	0	1.0917	0.126576	0	1.0452	0.063779	-1
P24666	Low molecular weight phosphotyrosine protein phosphatase	ACP1	1.0923	0.127369	0	1.0239	0.0340748	0	0.98884	-0.016191	0	1.0987	0.135798	-1
P24752	Acetyl-CoA acetyltransferase, mitochondrial	ACAT1	1.1087	0.148869	0	1.0242	0.0344975	0	1.1685	0.224658	1	1.0982	0.135141	-1
P25205	DNA replication licensing factor MCM3	MCM3	1.0588	0.0824301	0	0.95653	-0.0641179	0	1.0317	0.0450235	0	1.0433	0.0611541	-1
P25325	3-mercaptopyruvate sulfurtransferase;Sulfurtransferase	MPST	0.85272	-0.229856	0	0.82629	-0.27528	-1	0.96344	-0.0537333	0	0.76151	-0.393065	0
P25398	40S ribosomal protein S12	RPS12	0.98177	-0.026543	0	1.0195	0.0278618	0	1.0108	0.0154976	0	1.0356	0.0504669	-1
P25685	DnaJ homolog subfamily B member 1	DNAJB1	0.95346	-0.0687557	0	1.0486	0.0684645	0	0.92904	-0.106187	0	0.98577	-0.020677	-1
P25705	ATP synthase subunit alpha, mitochondrial	ATP5A1	1.0769	0.106884	0	1.026	0.0370307	0	1.0692	0.0965317	0	1.0363	0.0514417	-1
P25786	Proteasome subunit alpha type-1	PSMA1	0.99223	-0.0112535	0	1.0009	0.00129784	0	1.0431	0.0608775	0	1.014	0.0200577	-1
P25788	Proteasome subunit alpha type-3	PSMA3	0.96736	-0.0478752	0	0.99214	-0.0113844	0	1.02	0.0285692	0	1.0963	0.132643	-1
P25789	Proteasome subunit alpha type-4;Proteasome subunit alpha type;Proteasome subunit beta type	PSMA4	0.97486	-0.036733	0	0.98605	-0.0202673	0	0.99252	-0.0108319	0	1.0549	0.0771062	-1
P25815	Protein S100-P	S100P	1.4022	0.487692	1	1.2226	0.289952	1	0.95198	-0.0709968	0	0.82729	-0.273535	0
P26006	Integrin alpha-3;Integrin alpha-3 heavy chain;Integrin alpha-3 light chain	ITGA3	1.0607	0.0850167	0	1.0887	0.122606	0	0.64961	-0.622354	-1	0.83797	-0.255029	0
P26038	Moesin	MSN	1.0171	0.0244615	0	1.0343	0.0486547	0	0.97022	-0.0436162	0	0.99101	-0.0130285	-1
P26196	Probable ATP-dependent RNA helicase DDX6	DDX6	0.96658	-0.049039	0	0.99344	-0.00949526	0	0.99932	-0.000981366	0	1.0275	0.0391384	-1
P26358	DNA (cytosine-5)-methyltransferase 1	DNMT1	0.54206	-0.883476	-1	0.53225	-0.909824	-1	0.80946	-0.304968	-1	0.90535	-0.143452	-1
P26368	Splicing factor U2AF 65 kDa subunit	U2AF2	1.0639	0.0893626	0	0.96944	-0.0447765	0	1.087	0.120352	0	1.059	0.0827026	-1
P26373	60S ribosomal protein L13	RPL13	0.96452	-0.0521169	0	0.98708	-0.0187611	0	0.99046	-0.0138294	0	1.0021	0.00302648	-1
P26447	Protein S100-A4	S100A4	1.0689	0.0961269	0	1.1116	0.152638	0	0.88861	-0.170378	0	0.87509	-0.192497	-1
P26583	High mobility group protein B2	HMGB2	1.0288	0.0409625	0	1.0111	0.0159257	0	1.323	0.403813	1	1.0849	0.117562	-1
P26599	Polypyrimidine tract-binding protein 1	PTBP1	1.1168	0.159371	0	1.0838	0.116099	0	1.0557	0.0781999	0	1.0002	0.00028851	-1
P26639	Threonine--tRNA ligase, cytoplasmic	TARS	0.93402	-0.0984747	0	0.95604	-0.0648571	0	0.96142	-0.0567613	0	1.0128	0.0183493	-1
P26640	Valine--tRNA ligase	VARS	0.73815	-0.438014	-1	0.77836	-0.361491	-1	0.85699	-0.22265	-1	0.87637	-0.190388	-1
P26641	Elongation factor 1-gamma	EEF1G	0.97639	-0.0344706	0	1.0138	0.0197731	0	0.97972	-0.0295586	0	0.96753	-0.0476217	-1
P27144	Adenylate kinase 4, mitochondrial	AK4	1.1006	0.13829	0	1.0033	0.00475306	0	0.97234	-0.0404672	0	0.97324	-0.0391325	-1
P27348	14-3-3 protein theta	YWHAQ	1.0041	0.00590296	0	0.96264	-0.0549317	0	1.0358	0.0507455	0	1.0218	0.0311128	-1
P27635	60S ribosomal protein L10	RPL10	0.99672	-0.00473982	0	0.95419	-0.0676515	0	0.98279	-0.0250449	0	0.97576	-0.0354018	-1
P27694	Replication protein A 70 kDa DNA-binding subunit;Replication protein A 70 kDa DNA-binding subunit, N-terminally processed	RPA1	0.88651	-0.173791	0	0.84952	-0.23528	0	0.95102	-0.0724524	0	0.99162	-0.0121407	-1
P27695	DNA-(apurinic or apyrimidinic site) lyase;DNA-(apurinic or apyrimidinic site) lyase, mitochondrial	APEX1	1.0446	0.0629506	0	1.0235	0.0335111	0	1.04	0.0565835	0	0.95881	-0.0606831	-1
P27797	Calreticulin	CALR	1.0216	0.0308304	0	1.0047	0.00676478	0	0.96643	-0.0492629	0	0.88848	-0.170589	-1
P27824	Calnexin	CANX	0.99464	-0.00775364	0	1.0096	0.0137838	0	0.97485	-0.0367478	0	0.95193	-0.0710726	-1
P28066	Proteasome subunit alpha type-5	PSMA5	1.0266	0.0378742	0	1.0223	0.0318186	0	0.95942	-0.0597656	0	1.0024	0.00345832	-1
P28070	Proteasome subunit beta type-4	PSMB4	0.92656	-0.110044	0	1.002	0.00288251	0	0.97809	-0.0319609	0	1.0495	0.0697022	-1
P28072	Proteasome subunit beta type-6	PSMB6	0.90034	-0.151458	0	0.99265	-0.010643	0	1.0105	0.0150693	0	1.0448	0.0632268	-1
P28074	Proteasome subunit beta type-5	PSMB5	0.93819	-0.092048	0	1.024	0.0342157	0	1.0207	0.0295589	0	1.0536	0.0753273	-1
P28331	NADH-ubiquinone oxidoreductase 75 kDa subunit, mitochondrial	NDUFS1	1.1178	0.160662	0	1.1161	0.158466	0	1.1781	0.236462	1	1.0653	0.0912598	-1
P28482	Mitogen-activated protein kinase 1	MAPK1	1.1502	0.201885	1	1.0618	0.086512	0	1.0686	0.0957219	0	1.0104	0.0149265	-1
P28838	Cytosol aminopeptidase	LAP3	1.0641	0.0896337	0	0.98854	-0.0166288	0	1.0581	0.081476	0	1.1218	0.165815	-1
Q5VZU9	Tripeptidyl-peptidase 2	TPP2	0.84102	-0.249788	-1	1.0121	0.0173518	0	0.96859	-0.046042	0	0.97268	-0.0399628	-1
P29353	SHC-transforming protein 1	SHC1	0.82997	-0.268869	-1	0.76954	-0.377932	-1	1.0284	0.0404015	0	0.91841	-0.12279	-1
P29401	Transketolase	TKT	1.0571	0.0801119	0	1.0326	0.0462815	0	1.1977	0.260267	1	1.1455	0.195977	1
P29692	Elongation factor 1-delta	EEF1D	1.0457	0.064469	0	1.0846	0.117163	0	0.92841	-0.107166	0	0.96479	-0.0517131	-1
P29966	Myristoylated alanine-rich C-kinase substrate	MARCKS	1.011	0.015783	0	0.98456	-0.022449	0	0.94966	-0.074517	0	0.87811	-0.187526	-1
P30040	Endoplasmic reticulum resident protein 29	ERP29	1.0424	0.059909	0	0.99466	-0.00772463	0	0.99779	-0.00319188	0	0.9317	-0.102063	-1
P30041	Peroxiredoxin-6	PRDX6	1.0388	0.0549179	0	1.1534	0.205893	1	0.85363	-0.228317	-1	0.92158	-0.117819	-1
P30043	Flavin reductase (NADPH)	BLVRB	0.77328	-0.370937	-1	0.73937	-0.435632	-1	0.84402	-0.244651	-1	0.87003	-0.200863	-1
P30044	Peroxiredoxin-5, mitochondrial	PRDX5	0.87082	-0.199554	0	0.84727	-0.239106	0	0.98247	-0.0255147	0	0.83213	-0.265119	0
P30046	D-dopachrome decarboxylase;D-dopachrome decarboxylase-like protein	DDT	0.96312	-0.0542125	0	0.96821	-0.0466081	0	0.96159	-0.0565062	0	0.9705	-0.0431999	-1
P30048	Thioredoxin-dependent peroxide reductase, mitochondrial	PRDX3	1.1103	0.15095	0	0.98469	-0.0222585	0	1.1542	0.206893	1	0.98178	-0.0265283	-1
P30049	ATP synthase subunit delta, mitochondrial	ATP5D	1.0956	0.131721	0	1.0874	0.120883	0	1.0175	0.0250288	0	1.0129	0.0184917	-1
P30050	60S ribosomal protein L12	RPL12	0.96177	-0.0562362	0	1.0282	0.0401209	0	0.9486	-0.0761282	0	0.99243	-0.0109627	-1
P30084	Enoyl-CoA hydratase, mitochondrial	ECHS1	1.0098	0.0140696	0	1.0034	0.00489684	0	1.0593	0.0831112	0	0.95187	-0.0711635	-1
P30085	UMP-CMP kinase	CMPK1	0.93766	-0.0928632	0	0.91799	-0.12345	0	0.96361	-0.0534787	0	0.95294	-0.0695427	-1
P30086	Phosphatidylethanolamine-binding protein 1;Hippocampal cholinergic neurostimulating peptide	PEBP1	1.0573	0.0803848	0	1.0571	0.0801119	0	1.1068	0.146395	0	1.0742	0.103263	-1
P30101	Protein disulfide-isomerase A3	PDIA3	0.98928	-0.0155492	0	0.95248	-0.0702393	0	1.0623	0.0871912	0	0.95553	-0.0656269	-1
P30153	Serine/threonine-protein phosphatase 2A 65 kDa regulatory subunit A alpha isoform	PPP2R1A	1.0023	0.00331439	0	0.97315	-0.0392659	0	1.0123	0.0176369	0	1.0274	0.038998	-1
P30260	Cell division cycle protein 27 homolog	CDC27	0.88025	-0.184015	0	0.85083	-0.233057	0	0.95886	-0.0606079	0	0.96706	-0.0483227	-1
P30405	Peptidyl-prolyl cis-trans isomerase F, mitochondrial	PPIF	1.0712	0.0992279	0	1.0862	0.11929	0	1.0623	0.0871912	0	1.0516	0.072586	-1
P30419	Glycylpeptide N-tetradecanoyltransferase 1	NMT1	1.074	0.102994	0	0.9989	-0.00158784	0	1.0293	0.0416635	0	0.96665	-0.0489345	-1
P30520	Adenylosuccinate synthetase isozyme 2	ADSS	0.91556	-0.127274	0	0.89976	-0.152388	0	1.3099	0.389457	1	1.0203	0.0289934	-1
P30533	Alpha-2-macroglobulin receptor-associated protein	LRPAP1	0.97234	-0.0404672	0	0.9674	-0.0478156	0	0.86969	-0.201427	-1	0.89348	-0.162493	-1
P30837	Aldehyde dehydrogenase X, mitochondrial	ALDH1B1	0.91952	-0.121047	0	1.028	0.0398403	0	1.0674	0.0941009	0	1.0688	0.0959919	-1
P31040	Succinate dehydrogenase [ubiquinone] flavoprotein subunit, mitochondrial	SDHA	0.80238	-0.317642	-1	0.7847	-0.349787	-1	1.045	0.0635029	0	1.0732	0.101919	-1
P31150	Rab GDP dissociation inhibitor alpha	GDI1	0.90019	-0.151699	0	0.90451	-0.144792	0	0.71903	-0.475876	-1	0.77851	-0.361213	0
P31153	S-adenosylmethionine synthase isoform type-2	MAT2A	1.0531	0.0746424	0	1.0607	0.0850167	0	0.89077	-0.166875	0	0.9376	-0.0929555	-1
P31327	Carbamoyl-phosphate synthase [ammonia], mitochondrial	CPS1	1.1542	0.206893	1	1.1348	0.182438	0	1.1523	0.204516	1	1.0948	0.130667	-1
P31350	Ribonucleoside-diphosphate reductase subunit M2	RRM2	0.84688	-0.239771	0	0.80196	-0.318398	-1	0.73827	-0.43778	-1	0.83111	-0.266889	0
P31689	DnaJ homolog subfamily A member 1	DNAJA1	0.84955	-0.235229	0	0.88667	-0.173531	0	0.97454	-0.0372067	0	0.96176	-0.0562512	-1
P31930	Cytochrome b-c1 complex subunit 1, mitochondrial	UQCRC1	1.1291	0.175173	0	1.0632	0.088413	0	1.0583	0.0817487	0	0.98618	-0.0200771	-1
P31937	3-hydroxyisobutyrate dehydrogenase, mitochondrial	HIBADH	1.1642	0.219339	1	1.1478	0.198871	1	1.1085	0.148609	0	0.91705	-0.124928	-1
P31939	Bifunctional purine biosynthesis protein PURH;Phosphoribosylaminoimidazolecarboxamide formyltransferase;IMP cyclohydrolase	ATIC	0.88089	-0.182966	0	0.87067	-0.199802	0	0.88707	-0.17288	0	0.85322	-0.22901	-1
P31942	Heterogeneous nuclear ribonucleoprotein H3	HNRNPH3	1.5123	0.596744	1	1.4529	0.538935	1	1.0367	0.0519985	0	0.92228	-0.116723	-1
P31946	14-3-3 protein beta/alpha;14-3-3 protein beta/alpha, N-terminally processed	YWHAB	1.0031	0.00446544	0	0.96074	-0.057782	0	1.0716	0.0997665	0	1.0674	0.0941009	-1
P31947	14-3-3 protein sigma	SFN	0.87039	-0.200266	0	0.85262	-0.230025	0	0.84397	-0.244736	-1	0.81392	-0.297041	0
P31948	Stress-induced-phosphoprotein 1	STIP1	0.93765	-0.0928786	0	0.96295	-0.0544672	0	1.038	0.0538064	0	1.0202	0.028852	-1
P31949	Protein S100-A11;Protein S100-A11, N-terminally processed	S100A11	0.9585	-0.0611497	0	1.0007	0.00100953	0	1.009	0.0129262	0	0.94941	-0.0748968	-1
P32004	Neural cell adhesion molecule L1	L1CAM	1.2192	0.285935	1	1.2249	0.292664	1	1.0525	0.0738202	0	0.93715	-0.0936481	-1
P32119	Peroxiredoxin-2	PRDX2	0.97129	-0.042026	0	0.96545	-0.0507265	0	0.93232	-0.101103	0	0.95342	-0.0688162	-1
P32320	Cytidine deaminase	CDA	1.0305	0.0433445	0	1.0538	0.0756011	0	1.025	0.0356239	0	0.91236	-0.132325	-1
P32929	Cystathionine gamma-lyase	CTH	0.99144	-0.0124026	0	1.0653	0.0912598	0	0.85821	-0.220597	-1	0.89741	-0.156161	-1
P32969	60S ribosomal protein L9	RPL9	1.0191	0.0272956	0	0.99837	-0.00235351	0	0.99345	-0.00948074	0	1.0209	0.0298416	-1
P33176	Kinesin-1 heavy chain	KIF5B	1.01	0.0143553	0	0.99216	-0.0113553	0	0.98769	-0.0178698	0	0.98074	-0.0280574	-1
P33991	DNA replication licensing factor MCM4	MCM4	1.0365	0.0517201	0	1.0478	0.0673634	0	0.9978	-0.00317743	0	0.98622	-0.0200186	-1
P33992	DNA replication licensing factor MCM5;DNA helicase	MCM5	1.0481	0.0677764	0	0.97616	-0.0348105	0	1.0173	0.0247452	0	1.043	0.0607392	-1
P33993	DNA replication licensing factor MCM7	MCM7	1.0264	0.0375931	0	1.0176	0.0251706	0	1.0438	0.0618453	0	0.98558	-0.0209551	-1
P34896	Serine hydroxymethyltransferase, cytosolic	SHMT1	0.70947	-0.495186	-1	0.66992	-0.577939	-1	0.78452	-0.350118	-1	0.78624	-0.346958	0
P34897	Serine hydroxymethyltransferase, mitochondrial;Serine hydroxymethyltransferase	SHMT2	0.94584	-0.0803319	0	0.94053	-0.0884541	0	1.0257	0.0366088	0	0.97134	-0.0419517	-1
P34932	Heat shock 70 kDa protein 4	HSPA4	0.89919	-0.153302	0	0.93832	-0.0918481	0	1.0349	0.0494914	0	1.0351	0.0497702	-1
P35221	Catenin alpha-1	CTNNA1	1.0251	0.0357647	0	1.0077	0.0110662	0	1.0713	0.0993625	0	1.0084	0.012068	-1
P35232	Prohibitin	PHB	0.83365	-0.262486	-1	0.90289	-0.147378	0	1.0021	0.00302648	0	0.97789	-0.0322559	-1
P35237	Serpin B6	SERPINB6	0.89416	-0.161395	0	0.84313	-0.246173	0	0.88256	-0.180234	0	0.86766	-0.204798	-1
P35241	Radixin	RDX	0.85825	-0.22053	0	0.80152	-0.31919	-1	1.0536	0.0753273	0	1.067	0.0935602	-1
P35244	Replication protein A 14 kDa subunit	RPA3	0.95789	-0.0620681	0	0.95024	-0.0736362	0	0.99635	-0.00527547	0	0.98934	-0.0154617	-1
P35249	Replication factor C subunit 4	RFC4	0.72333	-0.467274	-1	0.74942	-0.416154	-1	0.91014	-0.13584	0	0.90614	-0.142194	-1
P35250	Replication factor C subunit 2	RFC2	0.88277	-0.17989	0	0.76967	-0.377688	-1	0.8377	-0.255494	-1	0.95114	-0.0722704	-1
P35251	Replication factor C subunit 1	RFC1	0.7867	-0.346115	-1	0.73751	-0.439265	-1	1.1033	0.141825	0	1.0928	0.128029	-1
P35268	60S ribosomal protein L22	RPL22	0.98466	-0.0223024	0	0.94676	-0.0789293	0	0.98182	-0.0264695	0	0.96565	-0.0504277	-1
P35269	General transcription factor IIF subunit 1	GTF2F1	1.0002	0.00028851	0	1.2858	0.362666	1	1.0114	0.0163537	0	1.1157	0.157949	-1
P35270	Sepiapterin reductase	SPR	1.1281	0.173895	0	1.029	0.041243	0	1.0936	0.129085	0	1.0921	0.127105	-1
P35573	Glycogen debranching enzyme;4-alpha-glucanotransferase;Amylo-alpha-1,6-glucosidase	AGL	0.96869	-0.045893	0	0.99068	-0.013509	0	1.0404	0.0571383	0	1.0286	0.0406821	-1
P35579	Myosin-9	MYH9	1.0215	0.0306892	0	0.96782	-0.0471893	0	1.0089	0.0127832	0	1.0032	0.00460925	-1
P35580	Myosin-10	MYH10	0.98653	-0.0195652	0	0.9479	-0.0771932	0	1.0339	0.0480967	0	0.96673	-0.0488151	-1
P35606	Coatomer subunit beta	COPB2	1.0009	0.00129784	0	1.0262	0.0373119	0	0.97247	-0.0402744	0	0.98262	-0.0252945	-1
P35613	Basigin	BSG	1.1382	0.186754	0	1.1532	0.205643	1	0.96359	-0.0535087	0	1.0155	0.0221902	-1
P35637	RNA-binding protein FUS	FUS	0.76084	-0.394335	-1	0.75833	-0.399102	-1	1.1639	0.218967	1	1.0902	0.124593	-1
P35998	26S protease regulatory subunit 7	PSMC2	1.0584	0.081885	0	1.0252	0.0359054	0	0.96122	-0.0570614	0	0.98458	-0.0224197	-1
P36405	ADP-ribosylation factor-like protein 3	ARL3	0.83039	-0.268139	-1	0.72414	-0.465659	-1	0.94421	-0.0828203	0	0.87262	-0.196575	-1
P36507	Dual specificity mitogen-activated protein kinase kinase 2	MAP2K2	0.77803	-0.362102	-1	0.76013	-0.395682	-1	0.92719	-0.109063	0	0.90884	-0.137902	-1
P36542	ATP synthase subunit gamma, mitochondrial	ATP5C1	1.1339	0.181293	0	1.0472	0.066537	0	1.1537	0.206268	1	0.95656	-0.0640726	-1
P36543	V-type proton ATPase subunit E 1	ATP6V1E1	1.2764	0.352081	1	1.0308	0.0437644	0	0.99811	-0.00272927	0	1.1009	0.138683	-1
P36578	60S ribosomal protein L4	RPL4	0.96769	-0.0473831	0	1.0011	0.00158609	0	0.99394	-0.00876933	0	1.0334	0.0473988	-1
P36871	Phosphoglucomutase-1	PGM1	0.71257	-0.488896	-1	0.71758	-0.478788	-1	0.94709	-0.0784266	0	0.9987	-0.00187672	-1
P36915	Guanine nucleotide-binding protein-like 1	GNL1	0.92461	-0.113083	0	0.84646	-0.240486	0	0.95331	-0.0689827	0	0.96752	-0.0476366	-1
P36952	Serpin B5	SERPINB5	1.0457	0.064469	0	0.97011	-0.0437798	0	1.036	0.051024	0	0.99875	-0.0018045	-1
P36954	DNA-directed RNA polymerase II subunit RPB9	POLR2I	1.0705	0.0982848	0	0.79471	-0.3315	-1	0.90856	-0.138346	0	1.0042	0.00604663	-1
P36957	Dihydrolipoyllysine-residue succinyltransferase component of 2-oxoglutarate dehydrogenase complex, mitochondrial	DLST	1.0044	0.00633393	0	0.89478	-0.160395	0	1.0372	0.0526941	0	0.9915	-0.0123153	-1
P37108	Signal recognition particle 14 kDa protein	SRP14	0.98299	-0.0247514	0	0.8832	-0.179188	0	1.1103	0.15095	0	1.0124	0.0177794	-1
P37198	Nuclear pore glycoprotein p62	NUP62	0.92544	-0.111789	0	0.90332	-0.146691	0	0.98714	-0.0186734	0	0.98364	-0.0237977	-1
P37235	Hippocalcin-like protein 1	HPCAL1	0.87284	-0.196211	0	0.76084	-0.394335	-1	1.1432	0.193078	1	1.0507	0.0713508	-1
P37268	Squalene synthase	FDFT1	1.4722	0.557974	1	1.4119	0.497638	1	1.0586	0.0821576	0	0.82619	-0.275454	0
P37802	Transgelin-2	TAGLN2	0.95195	-0.0710423	0	0.99681	-0.00460955	0	0.9793	-0.0301772	0	1.0279	0.0396999	-1
P37837	Transaldolase	TALDO1	1.1476	0.19862	1	1.1228	0.167101	0	0.94109	-0.0875954	0	0.88475	-0.176658	-1
P38117	Electron transfer flavoprotein subunit beta	ETFB	0.86896	-0.202638	0	0.90278	-0.147554	0	0.96582	-0.0501738	0	0.8967	-0.157303	-1
P38159	RNA-binding motif protein, X chromosome;RNA-binding motif protein, X chromosome, N-terminally processed	RBMX	0.76763	-0.381517	-1	0.76625	-0.384113	-1	1.033	0.0468403	0	1.002	0.00288251	-1
P38606	V-type proton ATPase catalytic subunit A	ATP6V1A	0.90257	-0.147889	0	0.93818	-0.0920633	0	1.0207	0.0295589	0	1.0312	0.0443242	-1
P38646	Stress-70 protein, mitochondrial	HSPA9	1.0867	0.119954	0	1.0835	0.115699	0	1.0751	0.104471	0	1.0544	0.0764223	-1
P38919	Eukaryotic initiation factor 4A-III;Eukaryotic initiation factor 4A-III, N-terminally processed	EIF4A3	1.0615	0.0861044	0	0.93452	-0.0977026	0	1.0732	0.101919	0	1.068	0.0949116	-1
P39019	40S ribosomal protein S19	RPS19	0.9687	-0.0458782	0	0.9915	-0.0123153	0	0.98829	-0.0169937	0	0.97875	-0.0309877	-1
P39023	60S ribosomal protein L3	RPL3	1.0152	0.021764	0	0.98314	-0.0245312	0	0.9922	-0.0112971	0	1.0003	0.000432744	-1
P39687	Acidic leucine-rich nuclear phosphoprotein 32 family member A	ANP32A	1.0797	0.110631	0	1.0291	0.0413832	0	1.1119	0.153027	0	1.1283	0.174151	-1
P39748	Flap endonuclease 1	FEN1	0.88263	-0.180119	0	0.8756	-0.191656	0	1.0427	0.0603241	0	0.97113	-0.0422637	-1
P40121	Macrophage-capping protein	CAPG	1.0377	0.0533894	0	0.99765	-0.00339432	0	1.0763	0.10608	0	1.0135	0.0193461	-1
P40222	Alpha-taxilin	TXLNA	1.0592	0.082975	0	1.0366	0.0518593	0	0.81312	-0.29846	-1	0.82756	-0.273064	0
P40227	T-complex protein 1 subunit zeta	CCT6A	0.96437	-0.0523413	0	0.97088	-0.0426351	0	1.0689	0.0961269	0	1.0618	0.086512	-1
P40261	Nicotinamide N-methyltransferase	NNMT	1.0015	0.00216242	0	0.91389	-0.129908	0	1.2012	0.264476	1	0.97909	-0.0304866	-1
P40429	60S ribosomal protein L13a	RPL13A	1.0736	0.102457	0	0.97901	-0.0306045	0	0.9896	-0.0150826	0	1.0612	0.0856966	-1
P40763	Signal transducer and activator of transcription 3;Signal transducer and activator of transcription	STAT3	1.0975	0.134221	0	1.036	0.051024	0	1.089	0.123004	0	1.0226	0.0322419	-1
P40855	Peroxisomal biogenesis factor 19	PEX19	0.94999	-0.0740158	0	0.81448	-0.296049	-1	0.88314	-0.179286	0	1.0377	0.0533894	-1
P40925	Malate dehydrogenase, cytoplasmic;Malate dehydrogenase	MDH1	0.97332	-0.0390139	0	0.95439	-0.0673492	0	0.96756	-0.047577	0	0.99	-0.0144996	-1
P40926	Malate dehydrogenase, mitochondrial;Malate dehydrogenase	MDH2	1.0444	0.0626744	0	0.99775	-0.00324972	0	1.1065	0.146003	0	1.0224	0.0319597	-1
P40938	Replication factor C subunit 3	RFC3	0.94708	-0.0784418	0	0.72865	-0.456702	-1	0.96701	-0.0483973	0	1.0207	0.0295589	-1
P41091	Eukaryotic translation initiation factor 2 subunit 3;Putative eukaryotic translation initiation factor 2 subunit 3-like protein	EIF2S3	1.0308	0.0437644	0	1.0616	0.0862403	0	1.0226	0.0322419	0	1.1594	0.213378	1
P41227	N-alpha-acetyltransferase 10	NAA10	0.94628	-0.079661	0	0.91815	-0.123198	0	0.9521	-0.070815	0	1.0535	0.0751903	-1
P41250	Glycine--tRNA ligase	GARS	1.0617	0.0863762	0	1.0425	0.0600474	0	1.0746	0.1038	0	1.0766	0.106482	-1
P41252	Isoleucine--tRNA ligase, cytoplasmic	IARS	1.0923	0.127369	0	1.0289	0.0411028	0	1.0739	0.10286	0	1.0587	0.0822938	-1
P41743	Protein kinase C iota type	PRKCI	1.1372	0.185486	0	1.2555	0.328262	1	1.0311	0.0441843	0	1.0393	0.0556122	-1
P42126	Enoyl-CoA delta isomerase 1, mitochondrial	ECI1	0.62565	-0.676572	-1	0.55648	-0.845598	-1	0.76643	-0.383774	-1	0.67123	-0.575121	0
P42166	Lamina-associated polypeptide 2, isoform alpha;Thymopoietin;Thymopentin	TMPO	1.2211	0.288181	1	1.2101	0.275126	1	1.3711	0.455334	1	1.3956	0.480886	1
P42167	Lamina-associated polypeptide 2, isoforms beta/gamma;Thymopoietin;Thymopentin	TMPO	0.93607	-0.0953117	0	0.92973	-0.105116	0	0.82341	-0.280317	-1	0.88739	-0.17236	-1
P42224	Signal transducer and activator of transcription 1-alpha/beta;Signal transducer and activator of transcription	STAT1	0.66917	-0.579555	-1	0.6872	-0.541198	-1	0.93716	-0.0936327	0	0.92838	-0.107213	-1
P42285	Superkiller viralicidic activity 2-like 2	SKIV2L2	0.96179	-0.0562062	0	1.3187	0.399116	1	1.0359	0.0508847	0	1.0519	0.0729976	-1
P42574	Caspase-3;Caspase-3 subunit p17;Caspase-3 subunit p12	CASP3	1.241	0.311503	1	1.0894	0.123534	0	1.2885	0.365693	1	0.92684	-0.109608	-1
P42575	Caspase-2;Caspase-2 subunit p18;Caspase-2 subunit p13;Caspase-2 subunit p12	CASP2	1.0262	0.0373119	0	0.93905	-0.0907261	0	1.1914	0.252658	1	1.1274	0.172999	-1
P42677	40S ribosomal protein S27	RPS27	0.95346	-0.0687557	0	0.91743	-0.12433	0	0.93669	-0.0943564	0	0.92902	-0.106218	-1
P42704	Leucine-rich PPR motif-containing protein, mitochondrial	LRPPRC	0.80219	-0.317984	-1	0.78513	-0.348997	-1	0.98579	-0.0206477	0	0.98822	-0.0170958	-1
P42765	3-ketoacyl-CoA thiolase, mitochondrial	ACAA2	1.0523	0.0735461	0	1.0517	0.0727232	0	0.99084	-0.013276	0	0.99911	-0.00128457	-1
P42766	60S ribosomal protein L35	RPL35	0.98488	-0.0219801	0	0.99673	-0.00472534	0	1.0631	0.0882773	0	1.0494	0.0695647	-1
P43034	Platelet-activating factor acetylhydrolase IB subunit alpha	PAFAH1B1	1.0378	0.0535284	0	0.98207	-0.0261022	0	1.036	0.051024	0	1.0432	0.0610158	-1
P43246	DNA mismatch repair protein Msh2	MSH2	0.87392	-0.194427	0	0.8173	-0.291062	-1	1.0529	0.0743684	0	0.92115	-0.118492	-1
P43304	Glycerol-3-phosphate dehydrogenase, mitochondrial	GPD2	1.0224	0.0319597	0	1.0298	0.0423642	0	1.0724	0.100843	0	0.95574	-0.0653099	-1
P43487	Ran-specific GTPase-activating protein	RANBP1	1.0181	0.0258793	0	0.99	-0.0144996	0	1.0189	0.0270125	0	1.0394	0.055751	-1
P43490	Nicotinamide phosphoribosyltransferase	NAMPT	0.95882	-0.0606681	0	1.0045	0.00647756	0	0.95188	-0.0711484	0	1.0073	0.0104934	-1
P43686	26S protease regulatory subunit 6B	PSMC4	0.97281	-0.03977	0	0.97631	-0.0345888	0	0.99608	-0.00566648	0	1.0228	0.0325241	-1
P43897	Elongation factor Ts, mitochondrial;Elongation factor Ts	TSFM	1.2923	0.369941	1	0.9888	-0.0162494	0	1.1392	0.188021	1	1.0721	0.100439	-1
P45877	Peptidyl-prolyl cis-trans isomerase C	PPIC	0.88926	-0.169323	0	0.74166	-0.43117	-1	1.0307	0.0436245	0	1.0021	0.00302648	-1
P45973	Chromobox protein homolog 5	CBX5	1.3251	0.406101	1	1.2491	0.320889	1	1.1131	0.154583	0	1.0496	0.0698396	-1
P45974	Ubiquitin carboxyl-terminal hydrolase 5	USP5	0.85882	-0.219572	0	0.87635	-0.190421	0	1.0678	0.0946415	0	1.0821	0.113834	-1
P46013	Antigen KI-67	MKI67	0.56377	-0.826821	-1	0.60087	-0.734875	-1	0.95752	-0.0626255	0	0.9872	-0.0185857	-1
P46060	Ran GTPase-activating protein 1	RANGAP1	0.96658	-0.049039	0	0.92395	-0.114113	0	0.97969	-0.0296028	0	0.90018	-0.151715	-1
P46063	ATP-dependent DNA helicase Q1	RECQL	0.78876	-0.342342	-1	0.88293	-0.179629	0	0.95952	-0.0596152	0	0.9649	-0.0515487	-1
P46087	Probable 28S rRNA (cytosine(4447)-C(5))-methyltransferase	NOP2	0.91998	-0.120326	0	0.97254	-0.0401705	0	0.96681	-0.0486957	0	0.86651	-0.206712	-1
P46108	Adapter molecule crk	CRK	0.92594	-0.111009	0	0.92736	-0.108799	0	1.0373	0.0528332	0	1.0208	0.0297002	-1
P46109	Crk-like protein	CRKL	1.0208	0.0297002	0	0.95965	-0.0594198	0	1.0313	0.0444641	0	1.0561	0.0787464	-1
P46776	60S ribosomal protein L27a	RPL27A	0.99458	-0.00784067	0	1.0003	0.000432744	0	0.94588	-0.0802709	0	1.0219	0.031254	-1
P46777	60S ribosomal protein L5	RPL5	0.96087	-0.0575868	0	0.98269	-0.0251917	0	1.0067	0.00963382	0	1.0391	0.0553345	-1
P46778	60S ribosomal protein L21	RPL21	0.9582	-0.0616013	0	0.98833	-0.0169353	0	0.98764	-0.0179428	0	1.0298	0.0423642	-1
P46779	60S ribosomal protein L28	RPL28	0.91818	-0.123151	0	0.92484	-0.112724	0	0.90261	-0.147825	0	0.93126	-0.102744	-1
P46781	40S ribosomal protein S9	RPS9	1.003	0.00432161	0	1.0056	0.00805655	0	0.97709	-0.0334366	0	0.94346	-0.0839667	-1
P46783	40S ribosomal protein S10;Putative 40S ribosomal protein S10-like	RPS10	0.89605	-0.158349	0	0.94664	-0.0791122	0	0.94202	-0.0861704	0	0.94119	-0.0874421	-1
P46926	Glucosamine-6-phosphate isomerase 1;Glucosamine-6-phosphate isomerase	GNPDA1	1.2342	0.303576	1	1.1403	0.189413	1	1.0201	0.0287106	0	0.95299	-0.069467	-1
P46937	Transcriptional coactivator YAP1	YAP1	1.0589	0.0825664	0	1.2279	0.296193	1	0.99527	-0.00684014	0	1.1489	0.200253	1
P46940	Ras GTPase-activating-like protein IQGAP1	IQGAP1	1.136	0.183963	0	1.1116	0.152638	0	1.0622	0.0870554	0	0.99567	-0.00626043	-1
P46977	Dolichyl-diphosphooligosaccharide--protein glycosyltransferase subunit STT3A	STT3A	1.0097	0.0139267	0	1.0585	0.0820213	0	1.0424	0.059909	0	1.04	0.0565835	-1
P47712	Cytosolic phospholipase A2;Phospholipase A2;Lysophospholipase	PLA2G4A	0.88395	-0.177963	0	0.96804	-0.0468614	0	1.0364	0.0515809	0	1.1019	0.139993	-1
P47755	F-actin-capping protein subunit alpha-2	CAPZA2	0.90616	-0.142162	0	0.91734	-0.124472	0	1.0384	0.0543623	0	0.98085	-0.0278956	-1
P47756	F-actin-capping protein subunit beta	CAPZB	0.87162	-0.198229	0	0.9399	-0.0894208	0	0.96044	-0.0582326	0	0.98583	-0.0205892	-1
P47813	Eukaryotic translation initiation factor 1A, X-chromosomal;Eukaryotic translation initiation factor 1A, Y-chromosomal	EIF1AX	0.90449	-0.144824	0	0.9906	-0.0136255	0	0.84358	-0.245403	-1	1.0432	0.0610158	-1
P47895	Aldehyde dehydrogenase family 1 member A3	ALDH1A3	1.0746	0.1038	0	1.1374	0.18574	1	0.95424	-0.0675759	0	0.93883	-0.0910642	-1
P47897	Glutamine--tRNA ligase	QARS	0.72956	-0.454901	-1	0.73311	-0.447898	-1	0.7974	-0.326624	-1	0.86483	-0.209512	-1
P47914	60S ribosomal protein L29	RPL29	0.94967	-0.0745018	0	0.90619	-0.142115	0	0.89603	-0.158381	0	1.0161	0.0230424	-1
P47985	Cytochrome b-c1 complex subunit Rieske, mitochondrial;Cytochrome b-c1 complex subunit 11;Putative cytochrome b-c1 complex subunit Rieske-like protein 1	UQCRFS1	0.99903	-0.00140009	0	1.1671	0.222928	1	1.0097	0.0139267	0	0.94418	-0.0828662	-1
P48047	ATP synthase subunit O, mitochondrial	ATP5O	1.0414	0.0585243	0	1.0389	0.0550568	0	1.0433	0.0611541	0	0.99121	-0.0127374	-1
P48059	LIM and senescent cell antigen-like-containing domain protein 1	LIMS1	1.0399	0.0564448	0	0.98254	-0.025412	0	1.0587	0.0822938	0	1.1372	0.185486	-1
P48147	Prolyl endopeptidase	PREP	0.90983	-0.136331	0	0.83534	-0.259565	0	1.1511	0.203013	1	1.1668	0.222557	1
P48163	NADP-dependent malic enzyme	ME1	1.1103	0.15095	0	1.0911	0.125783	0	0.94704	-0.0785027	0	1.0317	0.0450235	-1
P48444	Coatomer subunit delta	ARCN1	0.98806	-0.0173294	0	0.97338	-0.038925	0	0.93264	-0.100608	0	0.89258	-0.163947	-1
P48507	Glutamate--cysteine ligase regulatory subunit	GCLM	0.86867	-0.20312	0	0.92104	-0.118664	0	0.96293	-0.0544972	0	1.0901	0.12446	-1
R4GMR5	26S proteasome non-ATPase regulatory subunit 8	PSMD8	0.93022	-0.104356	0	0.93689	-0.0940484	0	0.97392	-0.0381248	0	1.0009	0.00129784	-1
P48634	Protein PRRC2A	PRRC2A	0.84123	-0.249428	-1	0.8782	-0.187379	0	0.84665	-0.240162	-1	0.88834	-0.170816	-1
P48637	Glutathione synthetase	GSS	0.88431	-0.177376	0	0.8837	-0.178371	0	0.97228	-0.0405562	0	0.87534	-0.192085	-1
P48643	T-complex protein 1 subunit epsilon	CCT5	0.95965	-0.0594198	0	1.0006	0.000865357	0	1.0491	0.0691522	0	1.0447	0.0630887	-1
P48681	Nestin	NES	0.78079	-0.356994	-1	0.7524	-0.410428	-1	0.82126	-0.284089	-1	0.60084	-0.734947	0
P48735	Isocitrate dehydrogenase [NADP], mitochondrial	IDH2	0.78544	-0.348427	-1	0.69564	-0.523587	-1	0.97788	-0.0322707	0	0.88615	-0.174377	-1
P48960	CD97 antigen;CD97 antigen subunit alpha;CD97 antigen subunit beta	CD97	0.78689	-0.345766	-1	0.74946	-0.416077	-1	0.7113	-0.49147	-1	0.84141	-0.249119	0
P49006	MARCKS-related protein	MARCKSL1	1.0581	0.081476	0	0.93575	-0.095805	0	1.0004	0.000576963	0	1.0765	0.106348	-1
P49189	4-trimethylaminobutyraldehyde dehydrogenase	ALDH9A1	1.1478	0.198871	1	1.0779	0.108223	0	1.1491	0.200504	1	1.0453	0.0639171	-1
P49257	Protein ERGIC-53	LMAN1	0.9635	-0.0536434	0	0.94162	-0.0867831	0	0.99586	-0.00598516	0	0.92191	-0.117302	-1
P49321	Nuclear autoantigenic sperm protein	NASP	1.0595	0.0833836	0	1.0263	0.0374525	0	1.0758	0.10541	0	1.0308	0.0437644	-1
P49327	Fatty acid synthase;[Acyl-carrier-protein] S-acetyltransferase;[Acyl-carrier-protein] S-malonyltransferase;3-oxoacyl-[acyl-carrier-protein] synthase;3-oxoacyl-[acyl-carrier-protein] reductase;3-hydroxyacyl-[acyl-carrier-protein] dehydratase;Enoyl-[acyl-carrier-protein] reductase;Oleoyl-[acyl-carrier-protein] hydrolase	FASN	1.0878	0.121413	0	1.1042	0.143002	0	0.80651	-0.310236	-1	0.83309	-0.263456	0
P49354	Protein farnesyltransferase/geranylgeranyltransferase type-1 subunit alpha	FNTA	1.0257	0.0366088	0	0.8253	-0.277009	-1	1.0614	0.0859685	0	0.80904	-0.305717	0
P49368	T-complex protein 1 subunit gamma	CCT3	0.92978	-0.105039	0	0.96093	-0.0574968	0	0.99191	-0.0117189	0	1.0169	0.0241778	-1
P49411	Elongation factor Tu, mitochondrial	TUFM	1.096	0.132248	0	1.0742	0.103263	0	1.0855	0.11836	0	1.0043	0.00619029	-1
P49419	Alpha-aminoadipic semialdehyde dehydrogenase	ALDH7A1	0.78639	-0.346683	-1	0.80354	-0.315558	-1	0.95031	-0.0735299	0	0.88379	-0.178224	-1
P49458	Signal recognition particle 9 kDa protein	SRP9	0.95782	-0.0621735	0	0.96664	-0.0489494	0	1.0121	0.0173518	0	1.1097	0.15017	-1
P49588	Alanine--tRNA ligase, cytoplasmic	AARS	0.98627	-0.0199454	0	0.95405	-0.0678632	0	1.0021	0.00302648	0	0.97578	-0.0353722	-1
Q5T5C7	Serine--tRNA ligase, cytoplasmic	SARS	0.91054	-0.135206	0	0.9077	-0.139713	0	0.88551	-0.175419	0	0.91756	-0.124126	-1
P49720	Proteasome subunit beta type-3	PSMB3	1.037	0.0524159	0	0.93359	-0.099139	0	1.1045	0.143393	0	1.1065	0.146003	-1
P49721	Proteasome subunit beta type-2	PSMB2	1.0215	0.0306892	0	1.0674	0.0941009	0	1.1016	0.1396	0	1.0578	0.0810669	-1
P49736	DNA replication licensing factor MCM2	MCM2	1.0939	0.129481	0	1.0102	0.0146409	0	1.0665	0.092884	0	1.0218	0.0311128	-1
P49748	Very long-chain specific acyl-CoA dehydrogenase, mitochondrial	ACADVL	0.90553	-0.143166	0	0.94751	-0.0777869	0	0.74941	-0.416173	-1	0.74442	-0.425811	0
P49755	Transmembrane emp24 domain-containing protein 10	TMED10	0.96226	-0.0555013	0	0.98468	-0.0222731	0	0.96271	-0.0548268	0	1.0203	0.0289934	-1
P49756	RNA-binding protein 25	RBM25	0.92505	-0.112397	0	0.94581	-0.0803777	0	0.9939	-0.00882739	0	1.0071	0.0102069	-1
P49770	Translation initiation factor eIF-2B subunit beta	EIF2B2	0.93807	-0.0922325	0	0.86825	-0.203818	0	0.82325	-0.280597	-1	0.83863	-0.253894	0
P49773	Histidine triad nucleotide-binding protein 1	HINT1	1.124	0.168642	0	1.0995	0.136848	0	1.1308	0.177344	1	1.0844	0.116897	-1
P49790	Nuclear pore complex protein Nup153	NUP153	1.027	0.0384362	0	0.92991	-0.104837	0	1.0958	0.131985	0	0.94908	-0.0753984	-1
P49792	E3 SUMO-protein ligase RanBP2	RANBP2	0.95993	-0.0589989	0	0.91732	-0.124503	0	1.1821	0.241352	1	1.0441	0.0622599	-1
P49902	Cytosolic purine 5-nucleotidase	NT5C2	1.286	0.362891	1	1.1228	0.167101	0	1.0832	0.1153	0	1.1564	0.209641	1
P49903	Selenide, water dikinase 1	SEPHS1	1.0002	0.00028851	0	1.0388	0.0549179	0	1.0501	0.0705267	0	1.0197	0.0281448	-1
P49915	GMP synthase [glutamine-hydrolyzing]	GMPS	0.86705	-0.205813	0	0.82684	-0.27432	-1	0.93502	-0.0969309	0	1.0052	0.00748258	-1
P50213	Isocitrate dehydrogenase [NAD] subunit alpha, mitochondrial	IDH3A	1.087	0.120352	0	1.034	0.0482362	0	1.1004	0.138028	0	1.0494	0.0695647	-1
P50395	Rab GDP dissociation inhibitor beta	GDI2	0.97835	-0.0315774	0	0.93196	-0.10166	0	0.9355	-0.0961904	0	0.95665	-0.0639369	-1
P50402	Emerin	EMD	1.056	0.0786098	0	0.97033	-0.0434526	0	1.0079	0.0113525	0	0.95538	-0.0658534	-1
P50416	Carnitine O-palmitoyltransferase 1, liver isoform	CPT1A	0.88354	-0.178633	0	0.8018	-0.318686	-1	0.97584	-0.0352835	0	0.87077	-0.199636	-1
P50454	Serpin H1	SERPINH1	0.99772	-0.0032931	0	1.0716	0.0997665	0	0.96468	-0.0518776	0	0.9127	-0.131787	-1
P50502	Hsc70-interacting protein	ST13	0.87483	-0.192925	0	0.92919	-0.105954	0	1.0063	0.00906047	0	1.0105	0.0150693	-1
P50552	Vasodilator-stimulated phosphoprotein	VASP	0.99917	-0.00119793	0	1.0453	0.0639171	0	0.99045	-0.0138439	0	1.0855	0.11836	-1
P50570	Dynamin-2	DNM2	1.0623	0.0871912	0	1.0551	0.0773797	0	1.0669	0.093425	0	1.0602	0.0843364	-1
P50579	Methionine aminopeptidase 2	METAP2	0.86965	-0.201493	0	0.88637	-0.174019	0	0.96712	-0.0482332	0	1.0567	0.0795658	-1
P50914	60S ribosomal protein L14	RPL14	0.96371	-0.053329	0	1.004	0.00575927	0	0.9762	-0.0347513	0	0.93953	-0.0899889	-1
P50990	T-complex protein 1 subunit theta	CCT8	0.98442	-0.0226541	0	0.99498	-0.00726057	0	1.0024	0.00345832	0	1.0184	0.0263043	-1
P50991	T-complex protein 1 subunit delta	CCT4	0.95919	-0.0601115	0	0.97351	-0.0387323	0	1.0404	0.0571383	0	1.0587	0.0822938	-1
P50995	Annexin A11	ANXA11	1.0499	0.0702519	0	1.1549	0.207768	1	1.0691	0.0963968	0	1.1135	0.155102	-1
P51114	Fragile X mental retardation syndrome-related protein 1	FXR1	0.97854	-0.0312973	0	0.96437	-0.0523413	0	1.023	0.0328061	0	0.94469	-0.0820871	-1
P51116	Fragile X mental retardation syndrome-related protein 2	FXR2	1.1693	0.225645	1	0.92516	-0.112225	0	1.1013	0.139208	0	0.85475	-0.226426	-1
P51148	Ras-related protein Rab-5C	RAB5C	0.91809	-0.123293	0	0.8865	-0.173807	0	1.0191	0.0272956	0	0.96974	-0.0443301	-1
P51149	Ras-related protein Rab-7a	RAB7A	1.0979	0.134747	0	1.0187	0.0267293	0	1.0195	0.0278618	0	0.99528	-0.00682564	-1
P51151	Ras-related protein Rab-9A	RAB9A	1.108	0.147958	0	1.0192	0.0274372	0	1.0043	0.00619029	0	0.90945	-0.136934	-1
P51153	Ras-related protein Rab-13	RAB13	1.1375	0.185867	0	1.1128	0.154194	0	0.92341	-0.114957	0	0.85322	-0.22901	-1
P51397	Death-associated protein 1	DAP	0.40991	-1.28662	-1	0.87217	-0.197319	0	0.94237	-0.0856345	0	0.48107	-1.05568	0
P51398	28S ribosomal protein S29, mitochondrial	DAP3	0.98067	-0.0281604	0	1.0262	0.0373119	0	1.0202	0.028852	0	1.299	0.377401	1
P51570	Galactokinase	GALK1	0.66733	-0.583528	-1	0.66514	-0.58827	-1	0.64189	-0.639602	-1	0.63931	-0.645412	0
P51571	Translocon-associated protein subunit delta	SSR4	1.0729	0.101516	0	0.9519	-0.0711181	0	1.0029	0.00417776	0	1.0072	0.0103502	-1
P51572	B-cell receptor-associated protein 31	BCAP31	1.0483	0.0680516	0	1.0896	0.123799	0	0.95763	-0.0624597	0	0.98835	-0.0169061	-1
P51610	Host cell factor 1;HCF N-terminal chain 1;HCF N-terminal chain 2;HCF N-terminal chain 3;HCF N-terminal chain 4;HCF N-terminal chain 5;HCF N-terminal chain 6;HCF C-terminal chain 1;HCF C-terminal chain 2;HCF C-terminal chain 3;HCF C-terminal chain 4;HCF C-terminal chain 5;HCF C-terminal chain 6	HCFC1	0.90416	-0.14535	0	0.89755	-0.155936	0	0.96522	-0.0510703	0	0.95421	-0.0676213	-1
P51665	26S proteasome non-ATPase regulatory subunit 7	PSMD7	1.1221	0.166201	0	1.0465	0.0655723	0	1.052	0.0731347	0	1.056	0.0786098	-1
P51812	Ribosomal protein S6 kinase alpha-3	RPS6KA3	1.1223	0.166458	0	1.0841	0.116498	0	0.94039	-0.0886689	0	1.0136	0.0194884	-1
P51858	Hepatoma-derived growth factor	HDGF	0.9513	-0.0720277	0	1.0025	0.00360224	0	0.99177	-0.0119225	0	1.0573	0.0803848	-1
P51970	NADH dehydrogenase [ubiquinone] 1 alpha subcomplex subunit 8	NDUFA8	1.1866	0.246834	1	1.1845	0.244278	1	1.1767	0.234747	1	1.0574	0.0805212	-1
P51991	Heterogeneous nuclear ribonucleoprotein A3	HNRNPA3	0.9213	-0.118257	0	0.95547	-0.0657175	0	1.1205	0.164143	0	1.0825	0.114367	-1
P52209	6-phosphogluconate dehydrogenase, decarboxylating	PGD	0.98389	-0.0234311	0	0.95461	-0.0670166	0	0.97373	-0.0384063	0	0.92655	-0.110059	-1
P52272	Heterogeneous nuclear ribonucleoprotein M	HNRNPM	0.97823	-0.0317544	0	0.91665	-0.125557	0	1.119	0.16221	0	1.0276	0.0392788	-1
P52292	Importin subunit alpha-1	KPNA2	0.75071	-0.413672	-1	0.75632	-0.402931	-1	0.90096	-0.150465	0	0.89666	-0.157367	-1
P52294	Importin subunit alpha-5;Importin subunit alpha-5, N-terminally processed	KPNA1	0.7722	-0.372954	-1	0.884	-0.177882	0	1.1503	0.20201	1	1.1561	0.209266	1
P52298	Nuclear cap-binding protein subunit 2	NCBP2	1.1438	0.193835	1	0.97078	-0.0427837	0	1.2127	0.278223	1	1.0844	0.116897	-1
P52306	Rap1 GTPase-GDP dissociation stimulator 1	RAP1GDS1	0.76626	-0.384094	-1	0.80198	-0.318362	-1	0.91288	-0.131503	0	0.89574	-0.158848	-1
P52597	Heterogeneous nuclear ribonucleoprotein F;Heterogeneous nuclear ribonucleoprotein F, N-terminally processed	HNRNPF	0.90506	-0.143915	0	0.94457	-0.0822704	0	1.1672	0.223052	1	1.0643	0.0899049	-1
P52701	DNA mismatch repair protein Msh6	MSH6	0.96522	-0.0510703	0	0.89747	-0.156064	0	1.0884	0.122209	0	1.0001	0.000144262	-1
P52732	Kinesin-like protein KIF11	KIF11	0.7808	-0.356975	-1	0.73501	-0.444164	-1	0.94147	-0.087013	0	1.0095	0.0136409	-1
P52735	Guanine nucleotide exchange factor VAV2	VAV2	0.91438	-0.129134	0	0.87308	-0.195814	0	1.0878	0.121413	0	1.1362	0.184217	-1
P52788	Spermine synthase	SMS	1.0785	0.109026	0	1.0435	0.0614306	0	0.97714	-0.0333628	0	1.0058	0.00834346	-1
P52888	Thimet oligopeptidase	THOP1	0.78913	-0.341665	-1	0.86509	-0.209078	0	1.0288	0.0409625	0	0.98002	-0.0291169	-1
P52907	F-actin-capping protein subunit alpha-1	CAPZA1	0.94509	-0.0814764	0	0.95207	-0.0708604	0	0.96942	-0.0448062	0	1.0065	0.00934717	-1
P52948	Nuclear pore complex protein Nup98-Nup96;Nuclear pore complex protein Nup98;Nuclear pore complex protein Nup96	NUP98	0.89074	-0.166924	0	0.95765	-0.0624296	0	0.91304	-0.13125	0	0.93165	-0.10214	-1
P53004	Biliverdin reductase A	BLVRA	0.91074	-0.134889	0	0.92833	-0.10729	0	0.99517	-0.0069851	0	1.0177	0.0253123	-1
P53007	Tricarboxylate transport protein, mitochondrial	SLC25A1	1.0706	0.0984196	0	1.1126	0.153935	0	1.1903	0.251325	1	1.0353	0.0500489	-1
P53367	Arfaptin-1	ARFIP1	1.2055	0.269632	1	1.0543	0.0762854	0	1.1191	0.162339	0	1.0487	0.068602	-1
P53396	ATP-citrate synthase	ACLY	1.0208	0.0297002	0	0.93119	-0.102853	0	0.94882	-0.0757937	0	0.9088	-0.137965	-1
P53582	Methionine aminopeptidase 1	METAP1	1.1176	0.160404	0	1.066	0.0922074	0	1.0083	0.0119249	0	1.0831	0.115166	-1
P53618	Coatomer subunit beta	COPB1	0.98739	-0.0183081	0	0.98713	-0.018688	0	0.92913	-0.106048	0	0.89069	-0.167005	-1
P53621	Coatomer subunit alpha;Xenin;Proxenin	COPA	0.98386	-0.0234751	0	1.0049	0.00705194	0	0.89998	-0.152035	0	0.89886	-0.153832	-1
P53701	Cytochrome c-type heme lyase	HCCS	0.89242	-0.164205	0	1.0094	0.013498	0	1.038	0.0538064	0	1.005	0.0071955	-1
P53985	Monocarboxylate transporter 1	SLC16A1	1.2536	0.326077	1	1.3374	0.419431	1	1.0035	0.00504062	0	0.96381	-0.0531793	-1
P53999	Activated RNA polymerase II transcriptional coactivator p15	SUB1	0.90968	-0.136569	0	0.97614	-0.03484	0	0.96231	-0.0554264	0	1.0202	0.028852	-1
P54105	Methylosome subunit pICln	CLNS1A	1.0212	0.0302654	0	1.0747	0.103934	0	1.0216	0.0308304	0	1.0123	0.0176369	-1
P54136	Arginine--tRNA ligase, cytoplasmic	RARS	1.0132	0.018919	0	1.0388	0.0549179	0	0.99261	-0.0107011	0	0.97267	-0.0399777	-1
P54289	Voltage-dependent calcium channel subunit alpha-2/delta-1;Voltage-dependent calcium channel subunit alpha-2-1;Voltage-dependent calcium channel subunit delta-1	CACNA2D1	1.5562	0.638027	1	1.383	0.467801	1	1.1463	0.196985	1	1.438	0.524064	1
P54577	Tyrosine--tRNA ligase, cytoplasmic;Tyrosine--tRNA ligase, cytoplasmic, N-terminally processed;Tyrosine--tRNA ligase	YARS	1.1307	0.177216	0	1.0615	0.0861044	0	1.0317	0.0450235	0	0.98561	-0.0209112	-1
P54578	Ubiquitin carboxyl-terminal hydrolase 14;Ubiquitin carboxyl-terminal hydrolase	USP14	0.97136	-0.041922	0	0.97483	-0.0367774	0	0.85531	-0.225481	-1	0.91538	-0.127557	-1
P54709	Sodium/potassium-transporting ATPase subunit beta-3	ATP1B3	1.0548	0.0769695	0	1.067	0.0935602	0	0.99766	-0.00337986	0	0.92762	-0.108394	-1
P54725	UV excision repair protein RAD23 homolog A	RAD23A	0.87854	-0.18682	0	0.85894	-0.219371	0	0.97422	-0.0376805	0	1.0015	0.00216242	-1
P54727	UV excision repair protein RAD23 homolog B	RAD23B	1.1007	0.138421	0	1.083	0.115033	0	0.97704	-0.0335105	0	1.0158	0.0226164	-1
P54886	Delta-1-pyrroline-5-carboxylate synthase;Glutamate 5-kinase;Gamma-glutamyl phosphate reductase	ALDH18A1	1.1072	0.146916	0	1.0529	0.0743684	0	1.1438	0.193835	1	1.0658	0.0919367	-1
P54920	Alpha-soluble NSF attachment protein	NAPA	1.03	0.0426443	0	1.0494	0.0695647	0	1.0313	0.0444641	0	0.98215	-0.0259847	-1
P55010	Eukaryotic translation initiation factor 5	EIF5	0.99165	-0.0120971	0	1.0015	0.00216242	0	0.90863	-0.138235	0	0.94477	-0.0819649	-1
P55036	26S proteasome non-ATPase regulatory subunit 4	PSMD4	0.96505	-0.0513244	0	0.98849	-0.0167017	0	0.99669	-0.00478324	0	0.95023	-0.0736513	-1
P55060	Exportin-2	CSE1L	0.79247	-0.335572	-1	0.77716	-0.363716	-1	0.95219	-0.0706786	0	0.92591	-0.111056	-1
P55072	Transitional endoplasmic reticulum ATPase	VCP	1.0184	0.0263043	0	0.9917	-0.0120243	0	0.9555	-0.0656722	0	0.95565	-0.0654458	-1
P55081	Microfibrillar-associated protein 1	MFAP1	0.96167	-0.0563862	0	0.91458	-0.128819	0	0.98031	-0.0286901	0	0.88731	-0.17249	-1
P55084	Trifunctional enzyme subunit beta, mitochondrial;3-ketoacyl-CoA thiolase	HADHB	1.115	0.157044	0	1.0543	0.0762854	0	1.0783	0.108759	0	1.0398	0.0563061	-1
P55265	Double-stranded RNA-specific adenosine deaminase	ADAR	1.0088	0.0126402	0	0.98313	-0.0245459	0	0.97429	-0.0375768	0	1.0032	0.00460925	-1
P55327	Tumor protein D52	TPD52	1.0343	0.0486547	0	0.97139	-0.0418775	0	0.92274	-0.116004	0	0.93094	-0.10324	-1
P55735	Protein SEC13 homolog	SEC13	0.97512	-0.0363483	0	0.99691	-0.00446483	0	0.9732	-0.0391918	0	0.97658	-0.0341899	-1
P55769	NHP2-like protein 1;NHP2-like protein 1, N-terminally processed	NHP2L1	1.032	0.045443	0	1.0176	0.0251706	0	1.0103	0.0147838	0	0.99556	-0.00641983	-1
P55786	Puromycin-sensitive aminopeptidase	NPEPPS	0.93127	-0.102729	0	0.89167	-0.165418	0	1.0573	0.0803848	0	1.0118	0.0169241	-1
P55795	Heterogeneous nuclear ribonucleoprotein H2	HNRNPH2	1.0267	0.0380147	0	0.99847	-0.00220901	0	1.0889	0.122871	0	0.9671	-0.048263	-1
P55809	Succinyl-CoA:3-ketoacid coenzyme A transferase 1, mitochondrial	OXCT1	1.0154	0.0220482	0	1.0246	0.0350608	0	0.96478	-0.0517281	0	0.92621	-0.110589	-1
[truncated: 961 more rows]

## Sheet: Significantly reg. Interface
Protein IDs	Protein names	Gene names	Ratio M/L Interface FWD	LOG2	Modulation	Ratio H/L Interface REV	LOG2	Modulation	Ratio M/L Interface REV	LOG2	Modulation	Ratio H/L Interface FWD	LOG2	Modulation
[truncated: 420 more rows]

[truncated: 2 more sheets: Interface normalized on WCE, Relaxed Interface]
